# Supplementary material for: VGEA: an RNA viral assembly toolkit
Source: PeerJ journal article supplement (doi:10.7717/peerj.12129), 2021-09-06
Supplement: Supplementary_File_2.zip [file Supplementary_File_2.zip]

# Report

|                             | CV29_velvet_contigs |
|-----------------------------|---------------------|
| # contigs (>= 0 bp)         | 541                 |
| # contigs (>= 1000 bp)      | 16                  |
| # contigs (>= 5000 bp)      | 0                   |
| # contigs (>= 10000 bp)     | 0                   |
| # contigs (>= 25000 bp)     | 0                   |
| # contigs (>= 50000 bp)     | 0                   |
| Total length (>= 0 bp)      | 163765              |
| Total length (>= 1000 bp)   | 24443               |
| Total length (>= 5000 bp)   | 0                   |
| Total length (>= 10000 bp)  | 0                   |
| Total length (>= 25000 bp)  | 0                   |
| Total length (>= 50000 bp)  | 0                   |
| # contigs                   | 66                  |
| Largest contig              | 2877                |
| Total length                | 59242               |
| Reference length            | 29903               |
| GC (%)                      | 46.83               |
| Reference GC (%)            | 37.97               |
| N50                         | 942                 |
| NG50                        | 1380                |
| N75                         | 680                 |
| NG75                        | 1093                |
| L50                         | 22                  |
| LG50                        | 9                   |
| L75                         | 41                  |
| LG75                        | 15                  |
| # misassemblies             | 0                   |
| # misassembled contigs      | 0                   |
| Misassembled contigs length | 0                   |
| # local misassemblies       | 0                   |
| # scaffold gap ext. mis.    | 0                   |
| # scaffold gap loc. mis.    | 0                   |
| # unaligned mis. contigs    | 0                   |
| # unaligned contigs         | 65 + 0 part         |
| Unaligned length            | 58650               |
| Genome fraction (%)         | 1.729               |
| Duplication ratio           | 1.145               |
| # N's per 100 kbp           | 126.60              |
| # mismatches per 100 kbp    | 0.00                |
| # indels per 100 kbp        | 0.00                |
| # genomic features          | 0 + 6 part          |
| Largest alignment           | 517                 |
| Total aligned length        | 517                 |
| NGA50                       | -                   |

All statistics are based on contigs of size >= 500 bp, unless otherwise noted (e.g., "# contigs (>= 0 bp)" and "Total length (>= 0 bp)" include all contigs).

## Misassemblies report

|                             | CV29_velvet_contigs |
|-----------------------------|---------------------|
| # misassemblies             | 0                   |
| # contig misassemblies      | 0                   |
| # c. relocations            | 0                   |
| # c. translocations         | 0                   |
| # c. inversions             | 0                   |
| # scaffold misassemblies    | 0                   |
| # s. relocations            | 0                   |
| # s. translocations         | 0                   |
| # s. inversions             | 0                   |
| # misassembled contigs      | 0                   |
| Misassembled contigs length | 0                   |
| # local misassemblies       | 0                   |
| # scaffold gap ext. mis.    | 0                   |
| # scaffold gap loc. mis.    | 0                   |
| # unaligned mis. contigs    | 0                   |
| # mismatches                | 0                   |
| # indels                    | 0                   |
| # indels (<= 5 bp)          | 0                   |
| # indels (> 5 bp)           | 0                   |
| Indels length               | 0                   |

All statistics are based on contigs of size  $\geq 500$  bp, unless otherwise noted (e.g., "# contigs ( $\geq 0$  bp)" and "Total length ( $\geq 0$  bp)" include all contigs).

## Unaligned report

|                               | CV29_velvet_contigs |
|-------------------------------|---------------------|
| # fully unaligned contigs     | 65                  |
| Fully unaligned length        | 58650               |
| # partially unaligned contigs | 0                   |
| Partially unaligned length    | 0                   |
| # N's                         | 75                  |

All statistics are based on contigs of size  $\geq 500$  bp, unless otherwise noted (e.g., "# contigs ( $\geq 0$  bp)" and "Total length ( $\geq 0$  bp)" include all contigs).

Nx

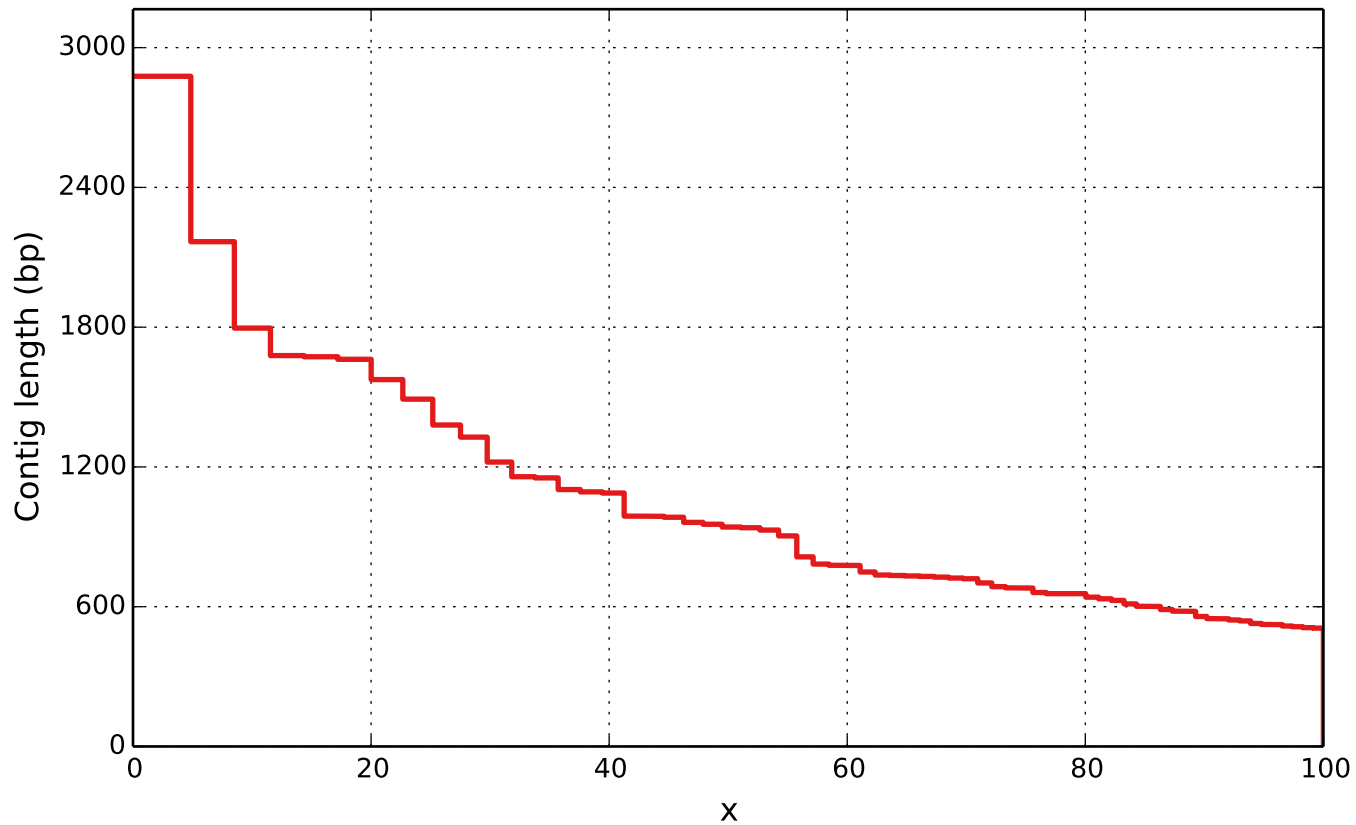

CV29\_velvet\_contigs

NGx

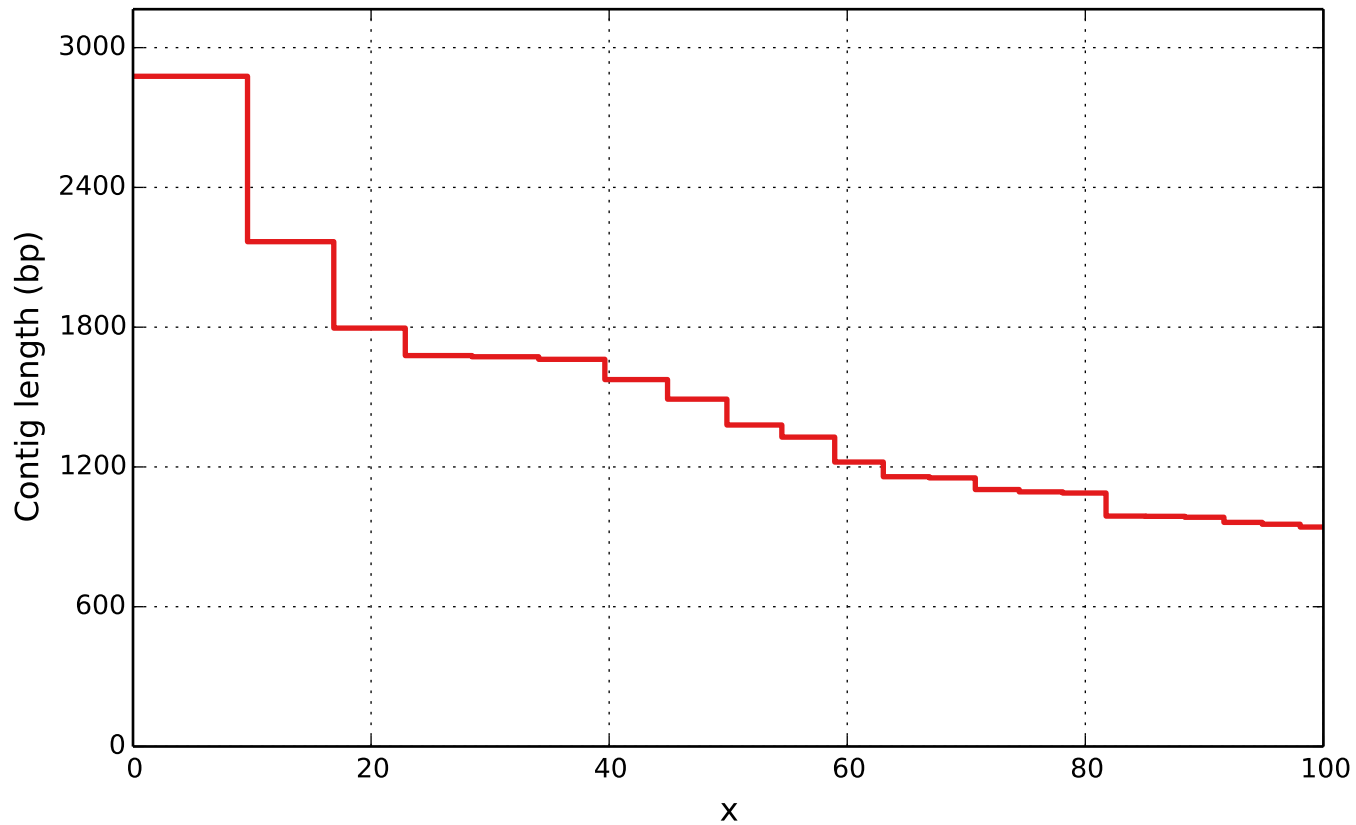

CV29\_velvet\_contigs

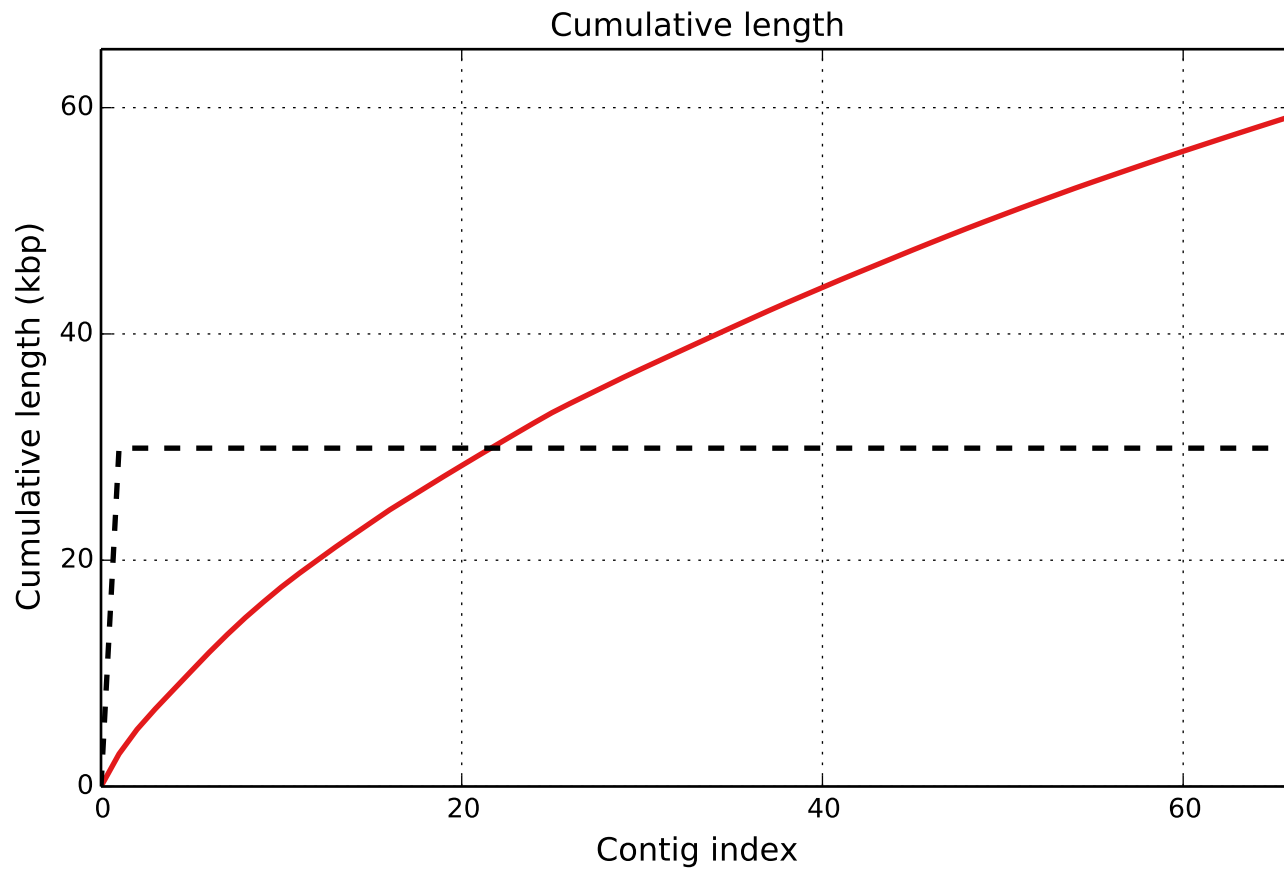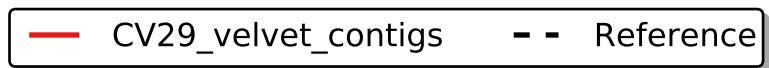

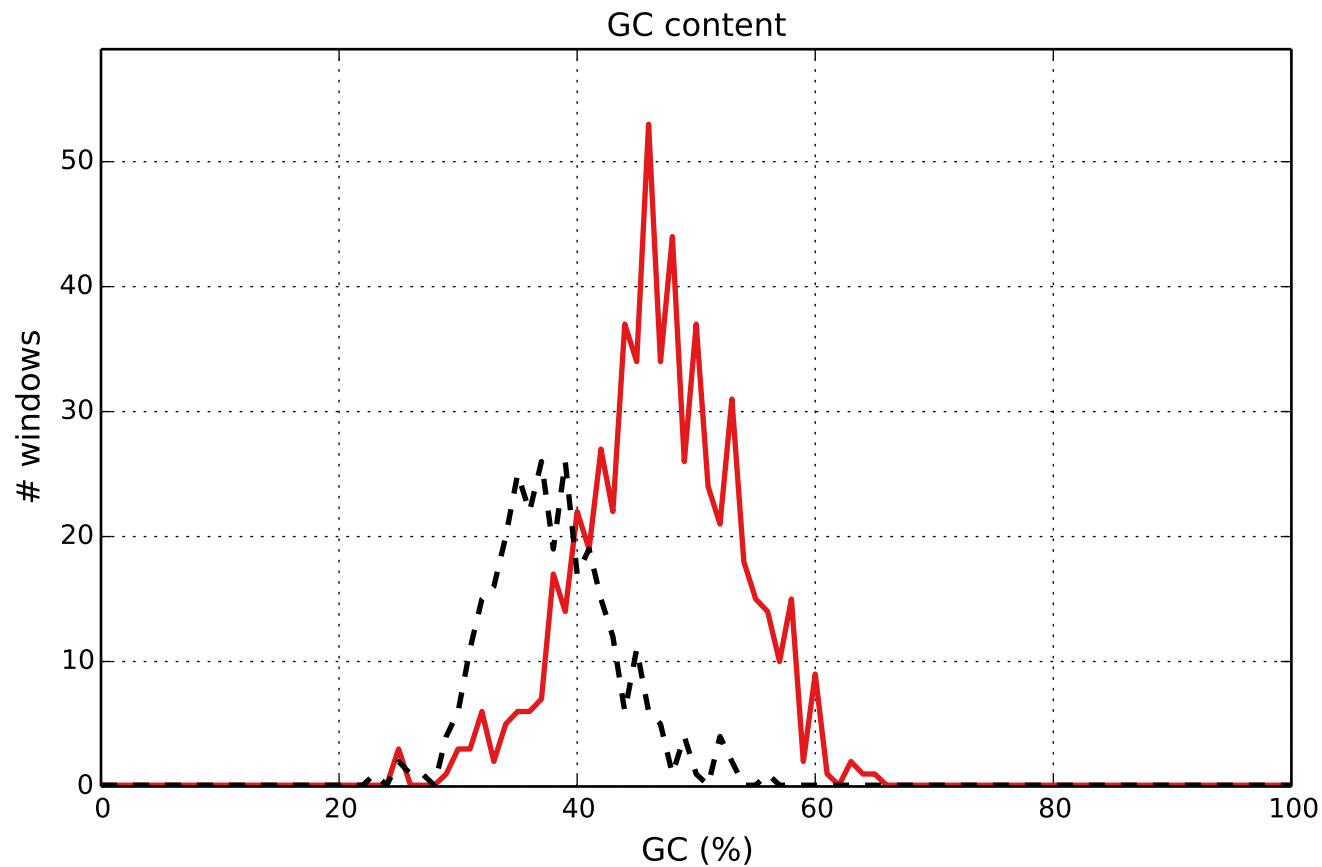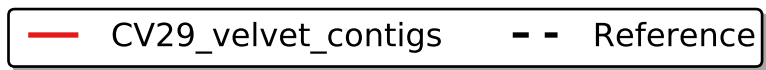

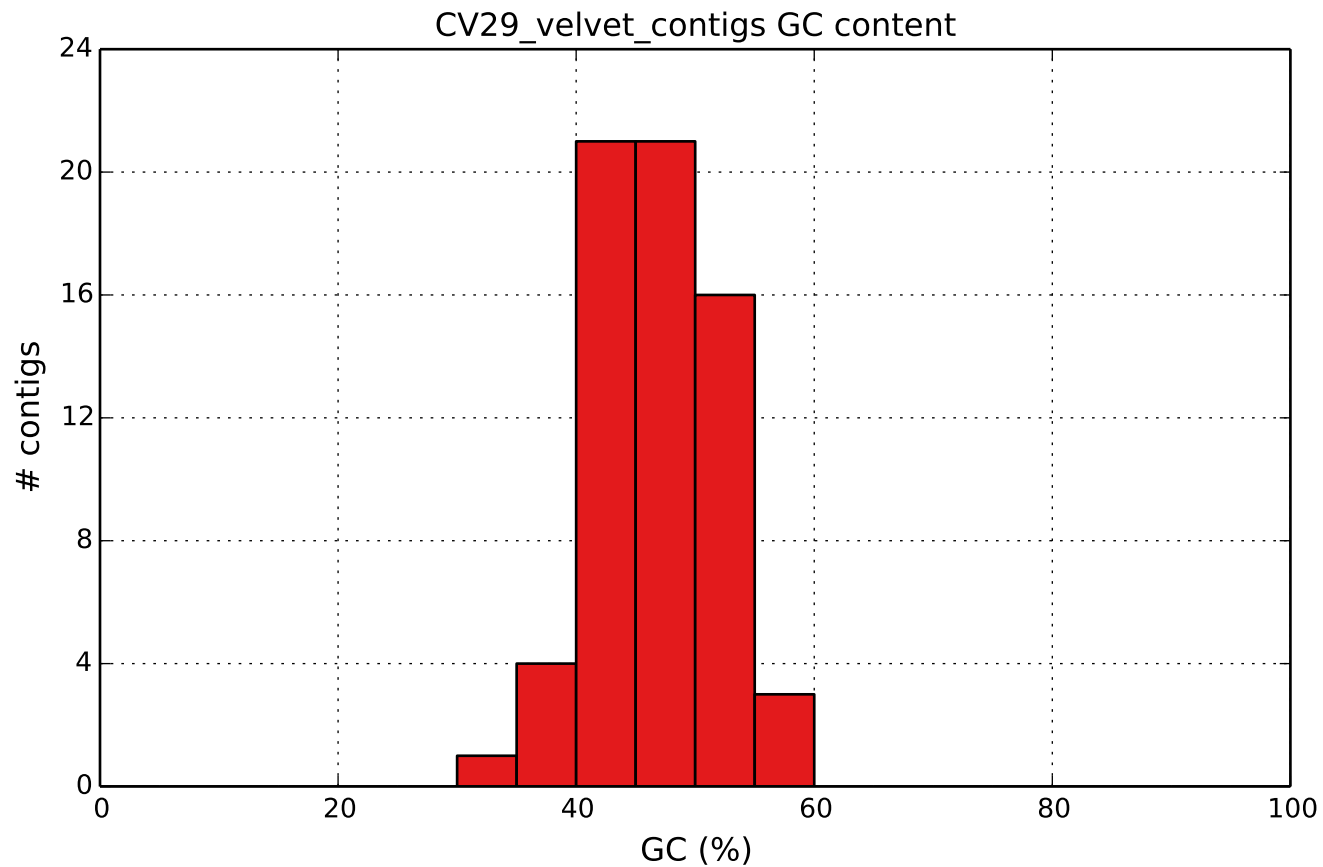

CV29\_velvet\_contigs



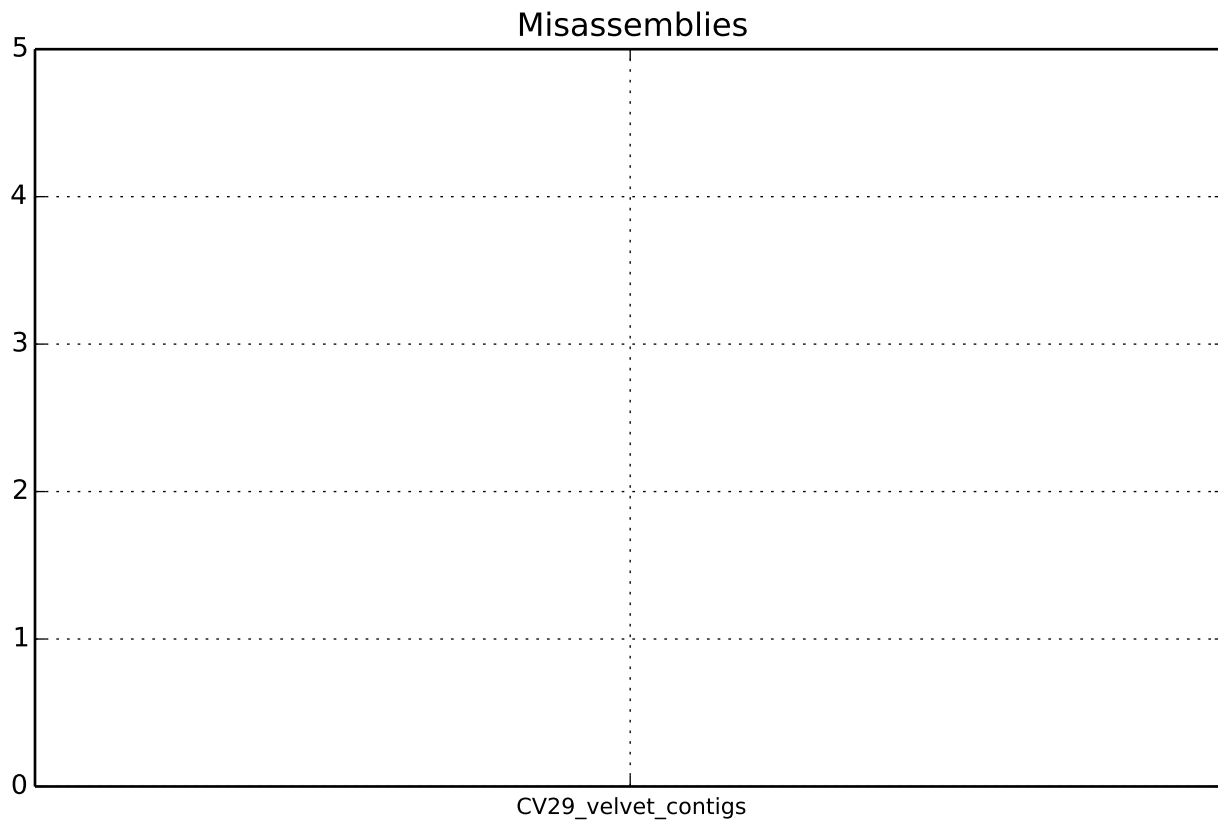

FRCurve (misassemblies)

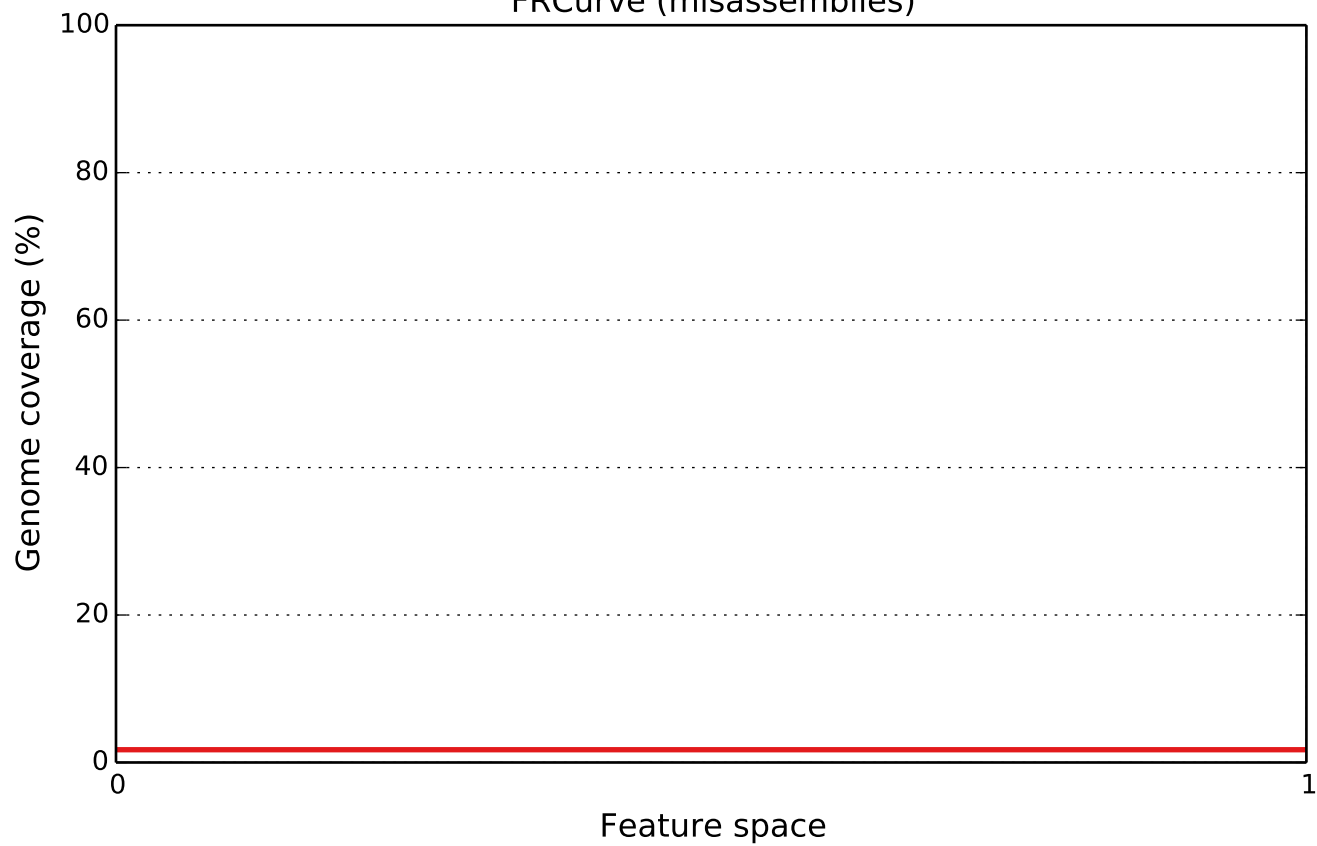

CV29\_velvet\_contigs

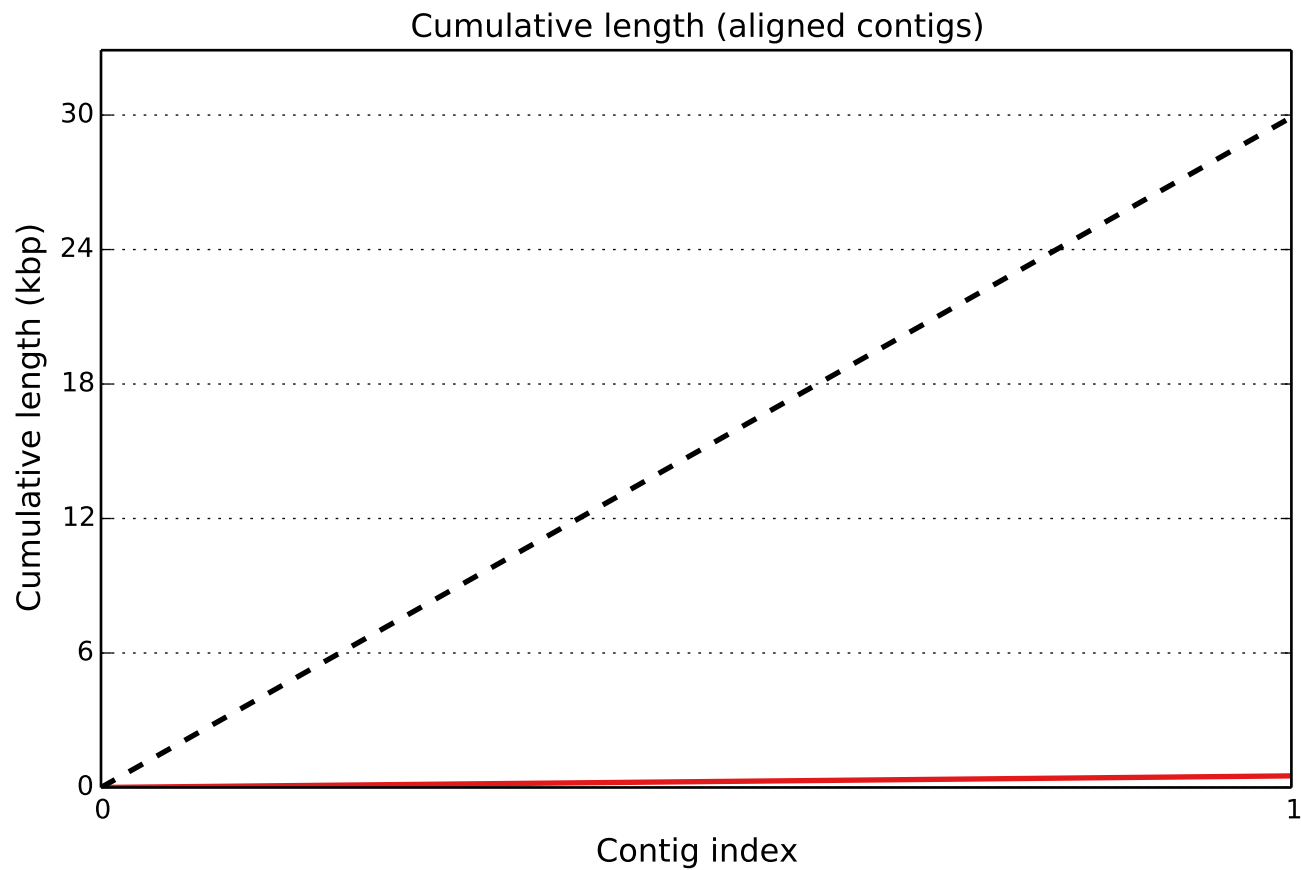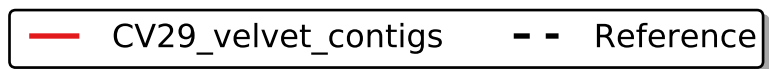

NAx

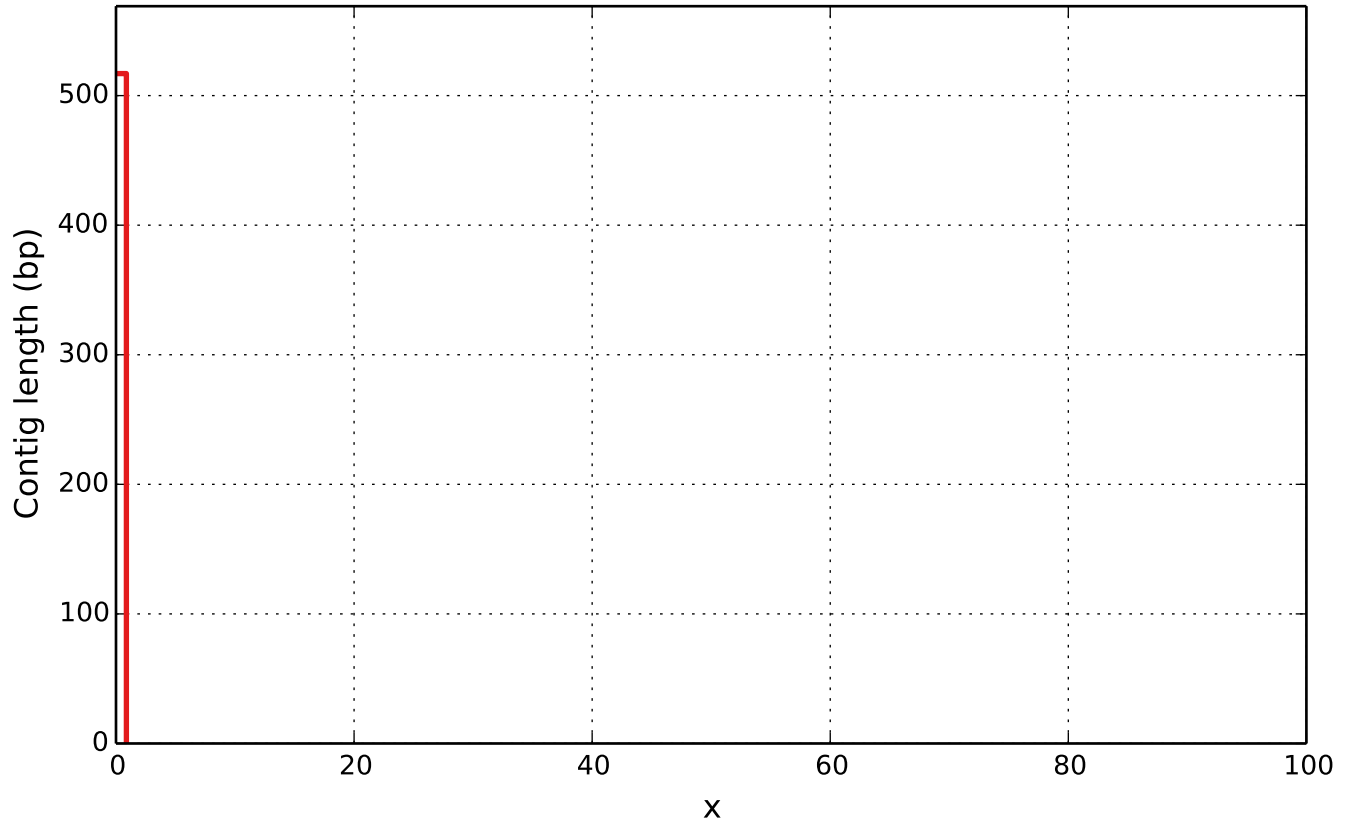

CV29\_velvet\_contigs

NGAx

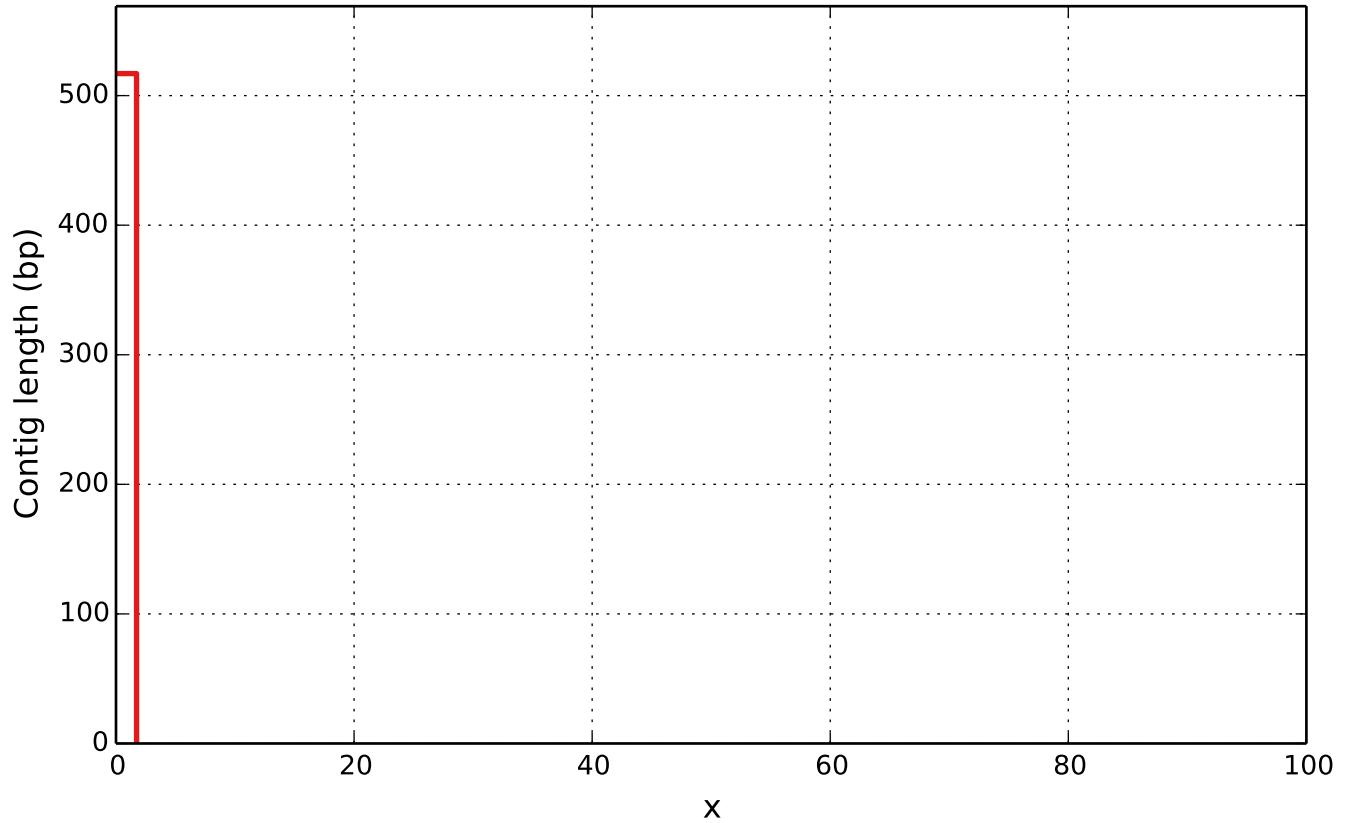

— CV29\_velvet\_contigs

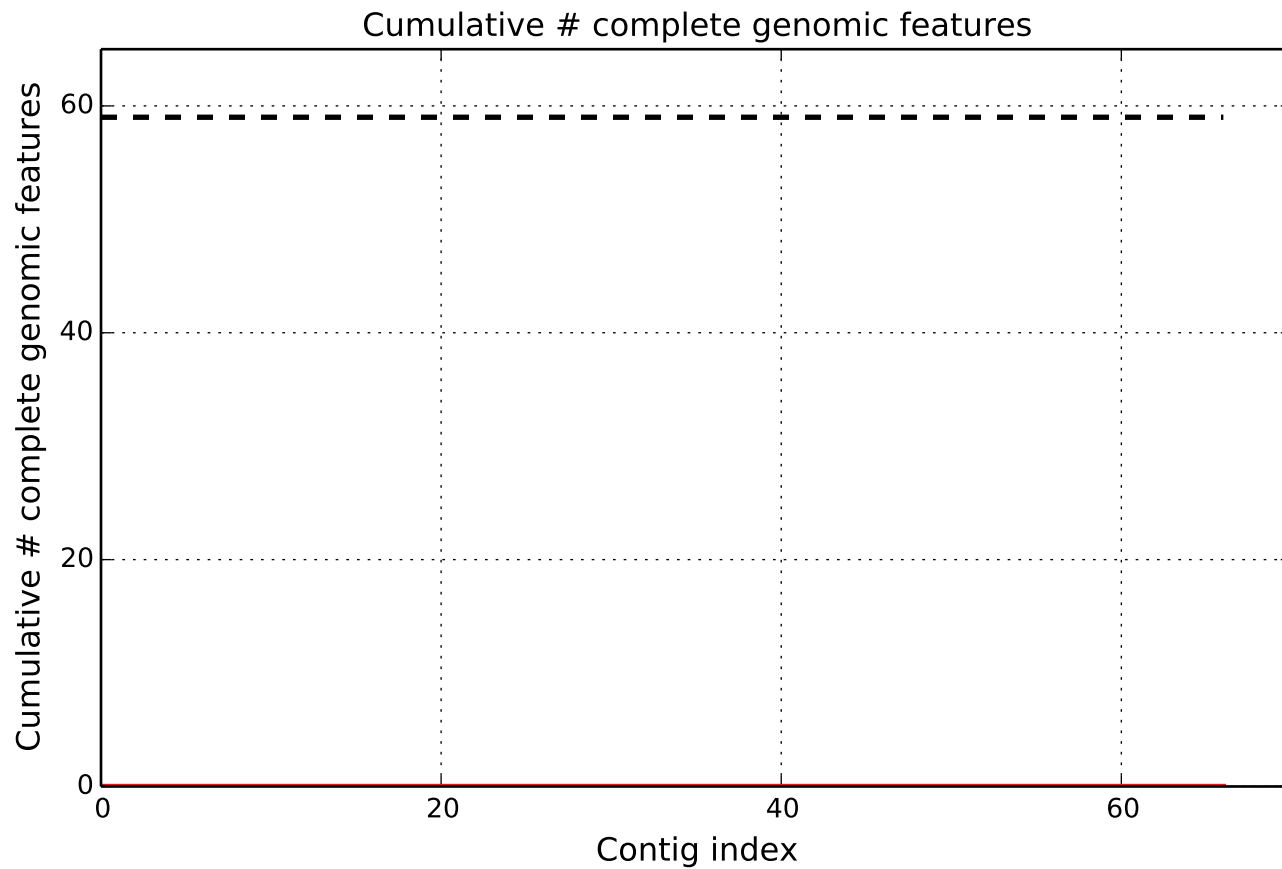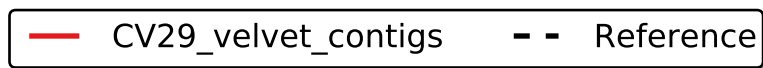

FRCurve (genomic features)

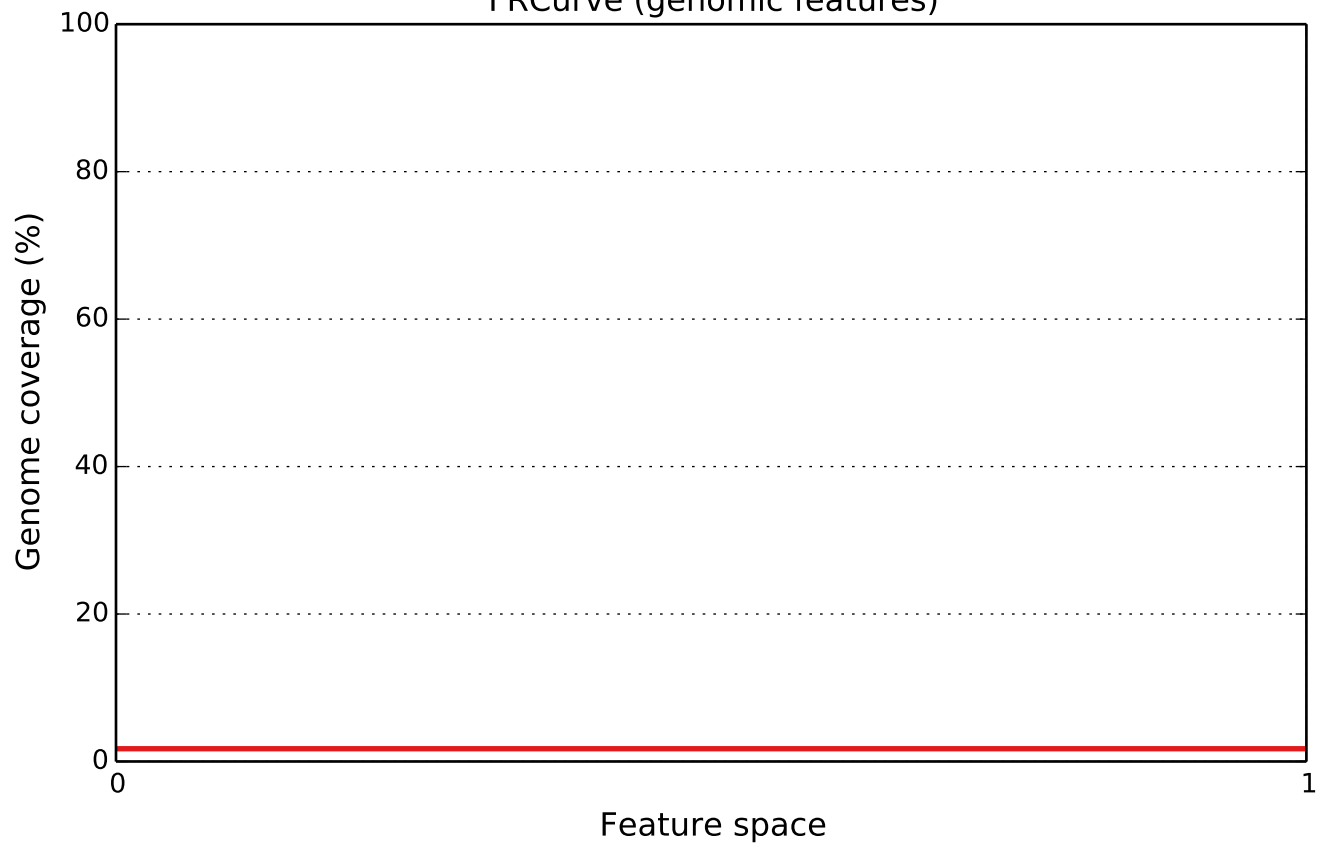

CV29\_velvet\_contigs
