# Supplementary material for: VGEA: an RNA viral assembly toolkit
Source: PeerJ journal article supplement (doi:10.7717/peerj.12129), 2021-09-06
Supplement: Supplementary_File_2.zip [file Supplementary_File_2.zip]

# Report

|                             | CV18_spades_contigs |
|-----------------------------|---------------------|
| # contigs (>= 0 bp)         | 1198                |
| # contigs (>= 1000 bp)      | 190                 |
| # contigs (>= 5000 bp)      | 4                   |
| # contigs (>= 10000 bp)     | 1                   |
| # contigs (>= 25000 bp)     | 0                   |
| # contigs (>= 50000 bp)     | 0                   |
| Total length (>= 0 bp)      | 614425              |
| Total length (>= 1000 bp)   | 353433              |
| Total length (>= 5000 bp)   | 44723               |
| Total length (>= 10000 bp)  | 22141               |
| Total length (>= 25000 bp)  | 0                   |
| Total length (>= 50000 bp)  | 0                   |
| # contigs                   | 384                 |
| Largest contig              | 22141               |
| Total length                | 493639              |
| Reference length            | 29903               |
| GC (%)                      | 50.68               |
| Reference GC (%)            | 37.97               |
| N50                         | 1435                |
| NG50                        | 22141               |
| N75                         | 940                 |
| NG75                        | 9089                |
| L50                         | 101                 |
| LG50                        | 1                   |
| L75                         | 208                 |
| LG75                        | 2                   |
| # misassemblies             | 1                   |
| # misassembled contigs      | 1                   |
| Misassembled contigs length | 9089                |
| # local misassemblies       | 0                   |
| # scaffold gap ext. mis.    | 0                   |
| # scaffold gap loc. mis.    | 0                   |
| # unaligned mis. contigs    | 0                   |
| # unaligned contigs         | 381 + 0 part        |
| Unaligned length            | 454716              |
| Genome fraction (%)         | 99.652              |
| Duplication ratio           | 1.306               |
| # N's per 100 kbp           | 0.00                |
| # mismatches per 100 kbp    | 60.40               |
| # indels per 100 kbp        | 3.36                |
| # genomic features          | 54 + 5 part         |
| Largest alignment           | 22069               |
| Total aligned length        | 38746               |
| NGA50                       | 22069               |
| NGA75                       | 7689                |
| LGA50                       | 1                   |
| LGA75                       | 2                   |

All statistics are based on contigs of size >= 500 bp, unless otherwise noted (e.g., "# contigs (>= 0 bp)" and "Total length (>= 0 bp)" include all contigs).

## Misassemblies report

|                             | CV18_spades_contigs |
|-----------------------------|---------------------|
| # misassemblies             | 1                   |
| # contig misassemblies      | 1                   |
| # c. relocations            | 1                   |
| # c. translocations         | 0                   |
| # c. inversions             | 0                   |
| # scaffold misassemblies    | 0                   |
| # s. relocations            | 0                   |
| # s. translocations         | 0                   |
| # s. inversions             | 0                   |
| # misassembled contigs      | 1                   |
| Misassembled contigs length | 9089                |
| # local misassemblies       | 0                   |
| # scaffold gap ext. mis.    | 0                   |
| # scaffold gap loc. mis.    | 0                   |
| # unaligned mis. contigs    | 0                   |
| # mismatches                | 18                  |
| # indels                    | 1                   |
| # indels (<= 5 bp)          | 0                   |
| # indels (> 5 bp)           | 1                   |
| Indels length               | 41                  |

All statistics are based on contigs of size  $\geq 500$  bp, unless otherwise noted (e.g., "# contigs ( $\geq 0$  bp)" and "Total length ( $\geq 0$  bp)" include all contigs).

## Unaligned report

|                               | CV18_spades_contigs |
|-------------------------------|---------------------|
| # fully unaligned contigs     | 381                 |
| Fully unaligned length        | 454716              |
| # partially unaligned contigs | 0                   |
| Partially unaligned length    | 0                   |
| # N's                         | 0                   |

All statistics are based on contigs of size  $\geq 500$  bp, unless otherwise noted (e.g., "# contigs ( $\geq 0$  bp)" and "Total length ( $\geq 0$  bp)" include all contigs).

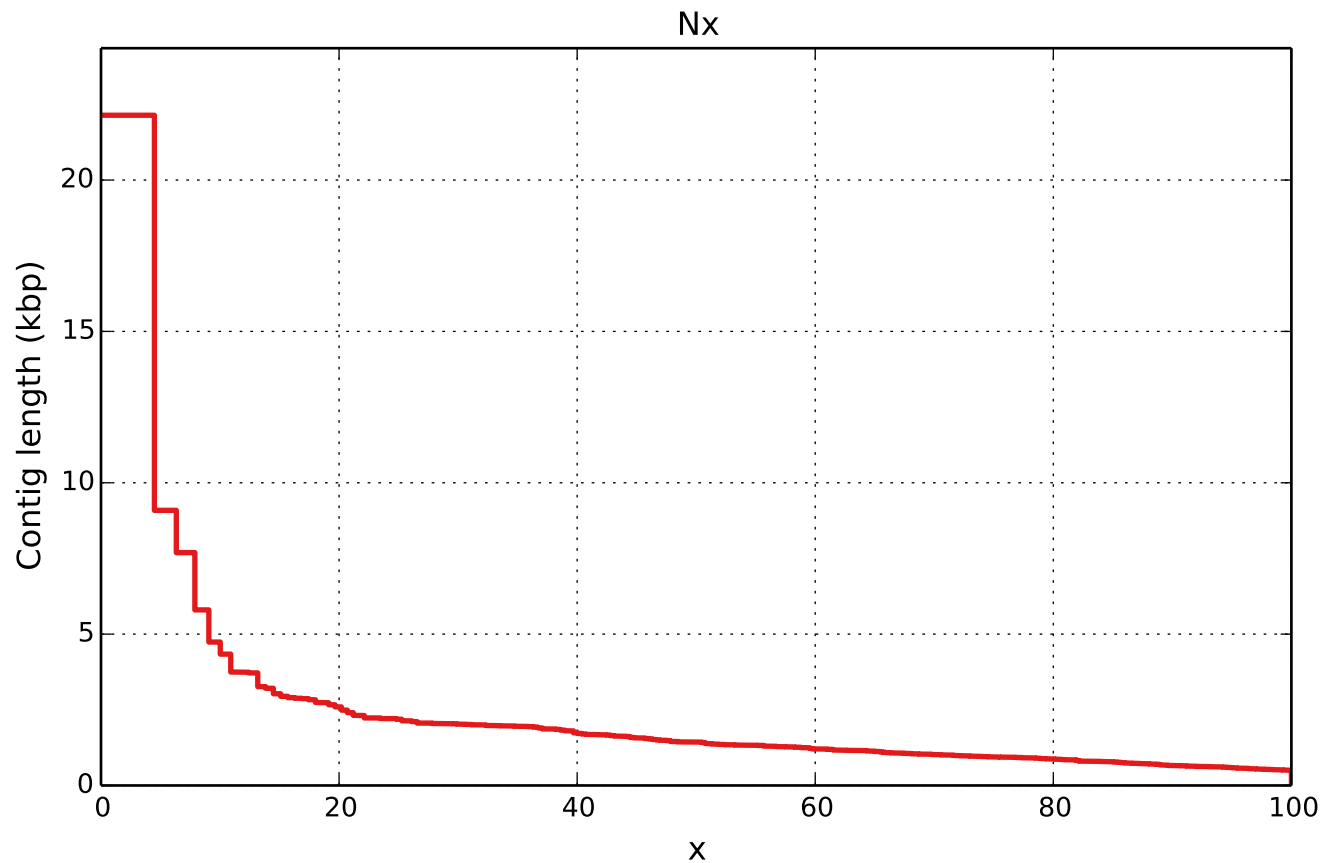

— CV18\_spades\_contigs

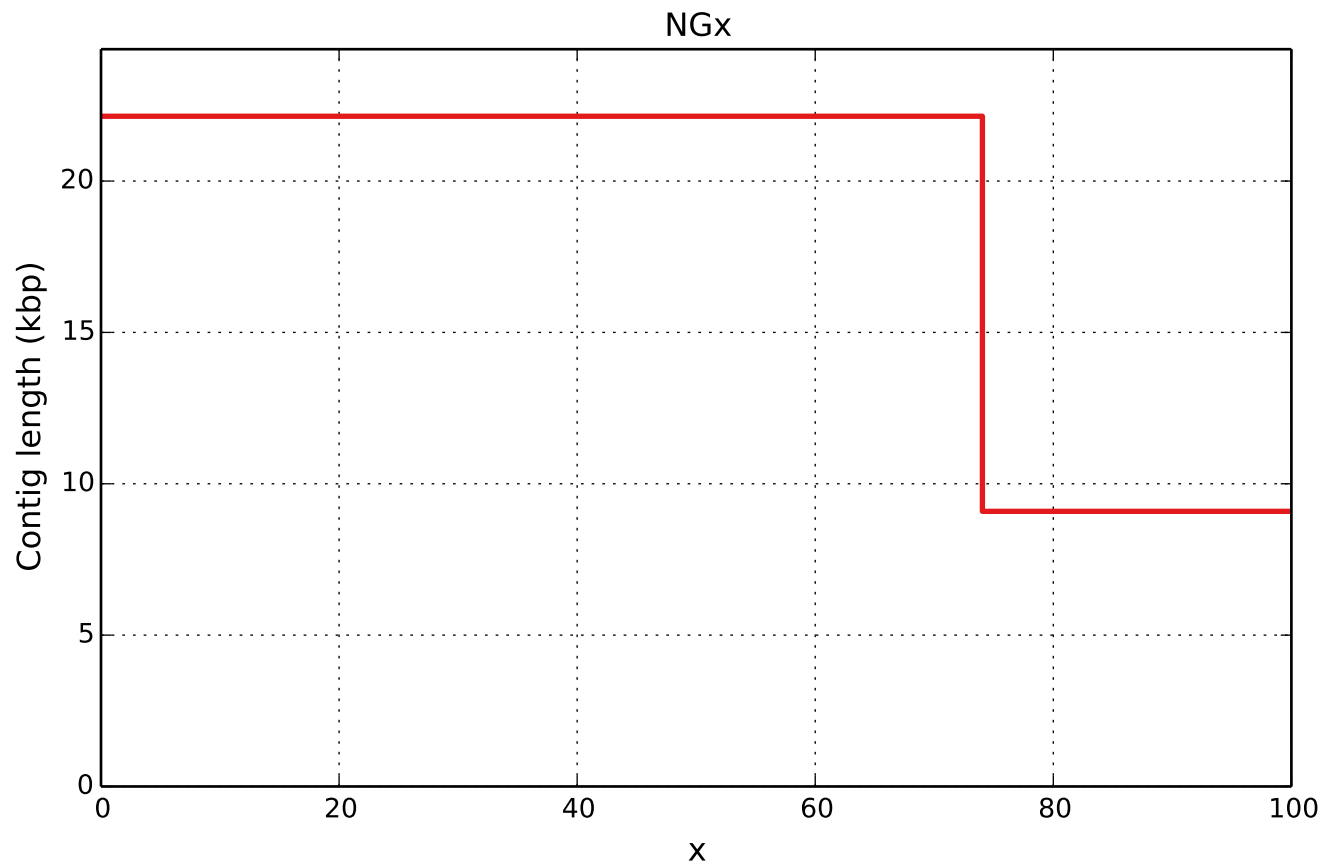

— CV18\_spades\_contigs

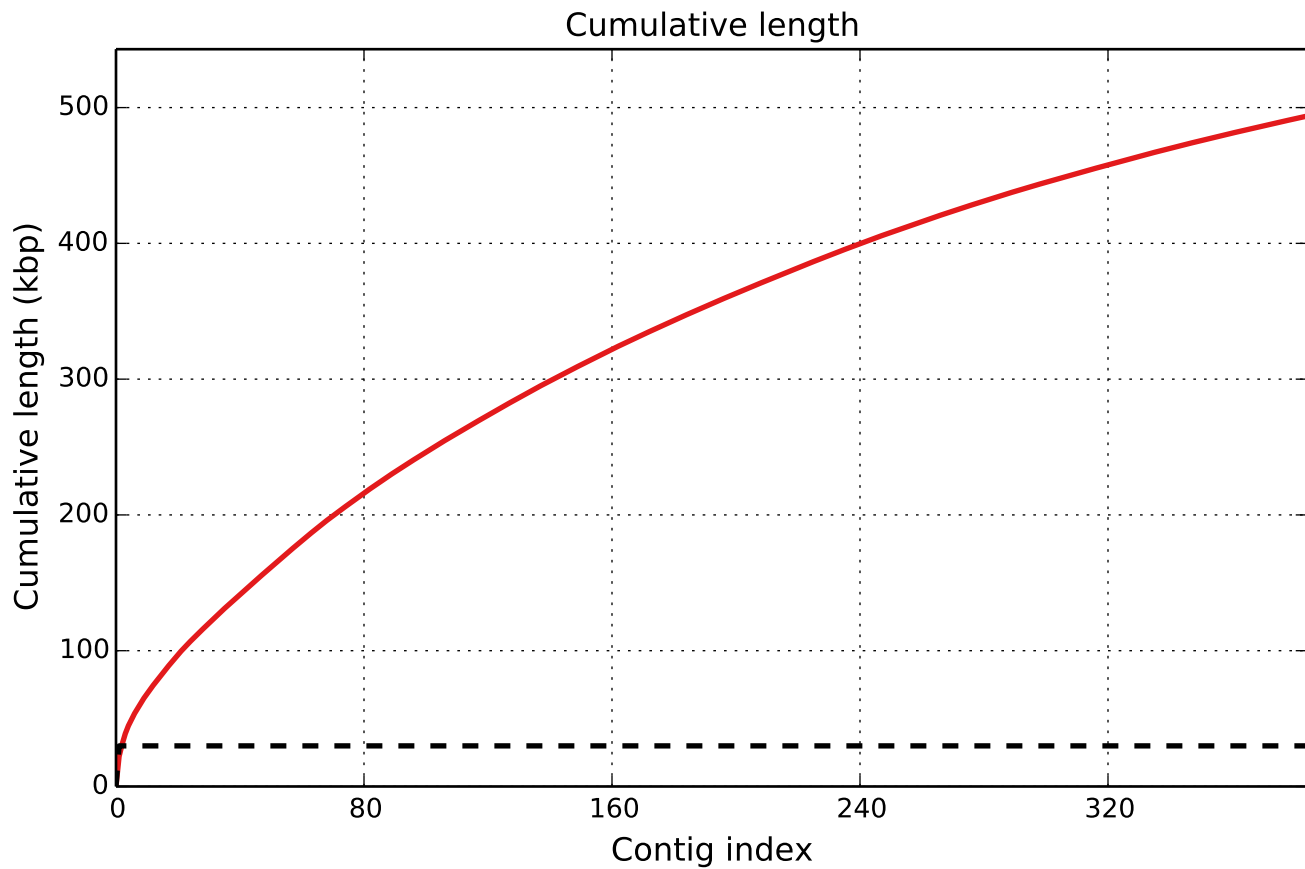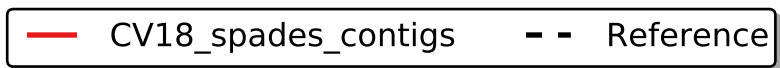

GC content

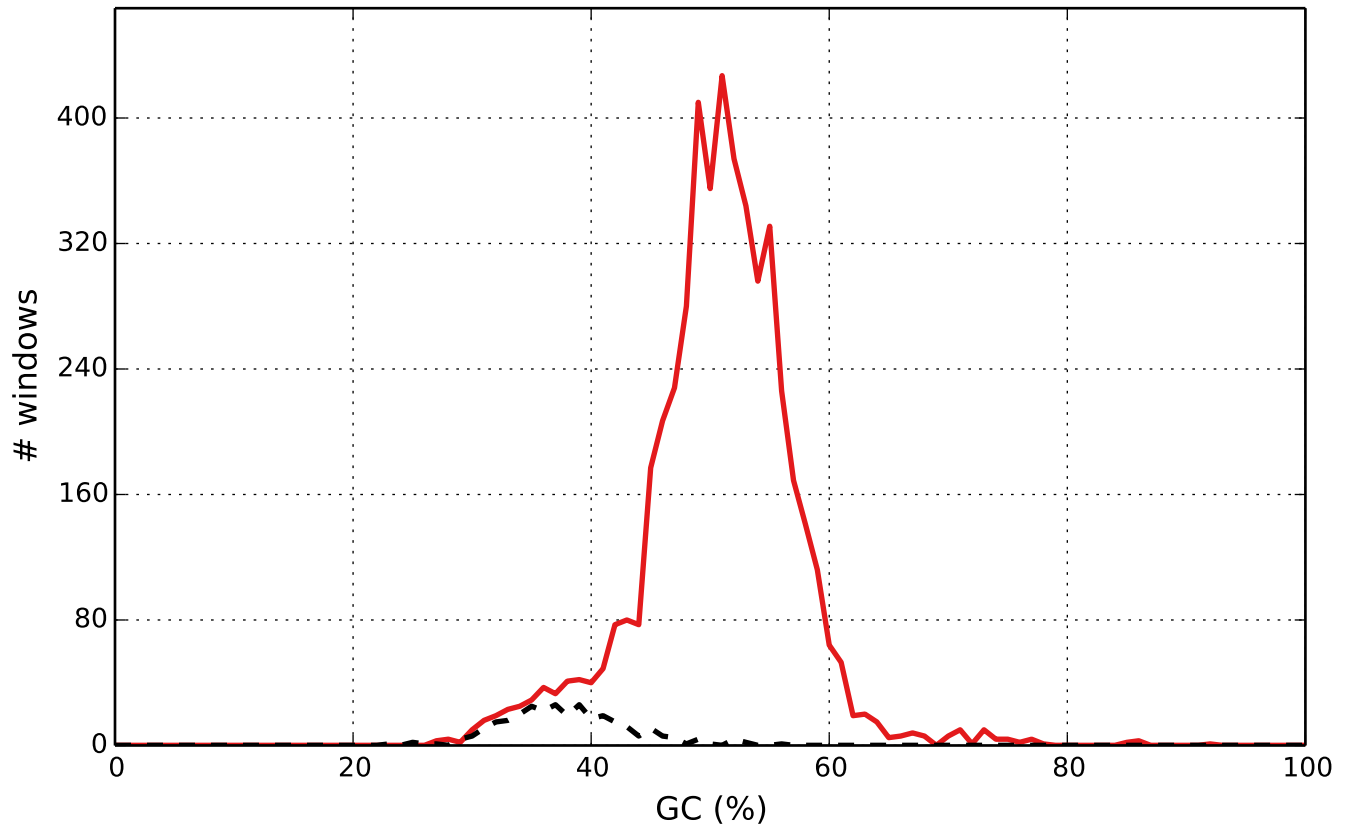

— CV18\_spades\_contigs    - - Reference

CV18\_spades\_contigs GC content

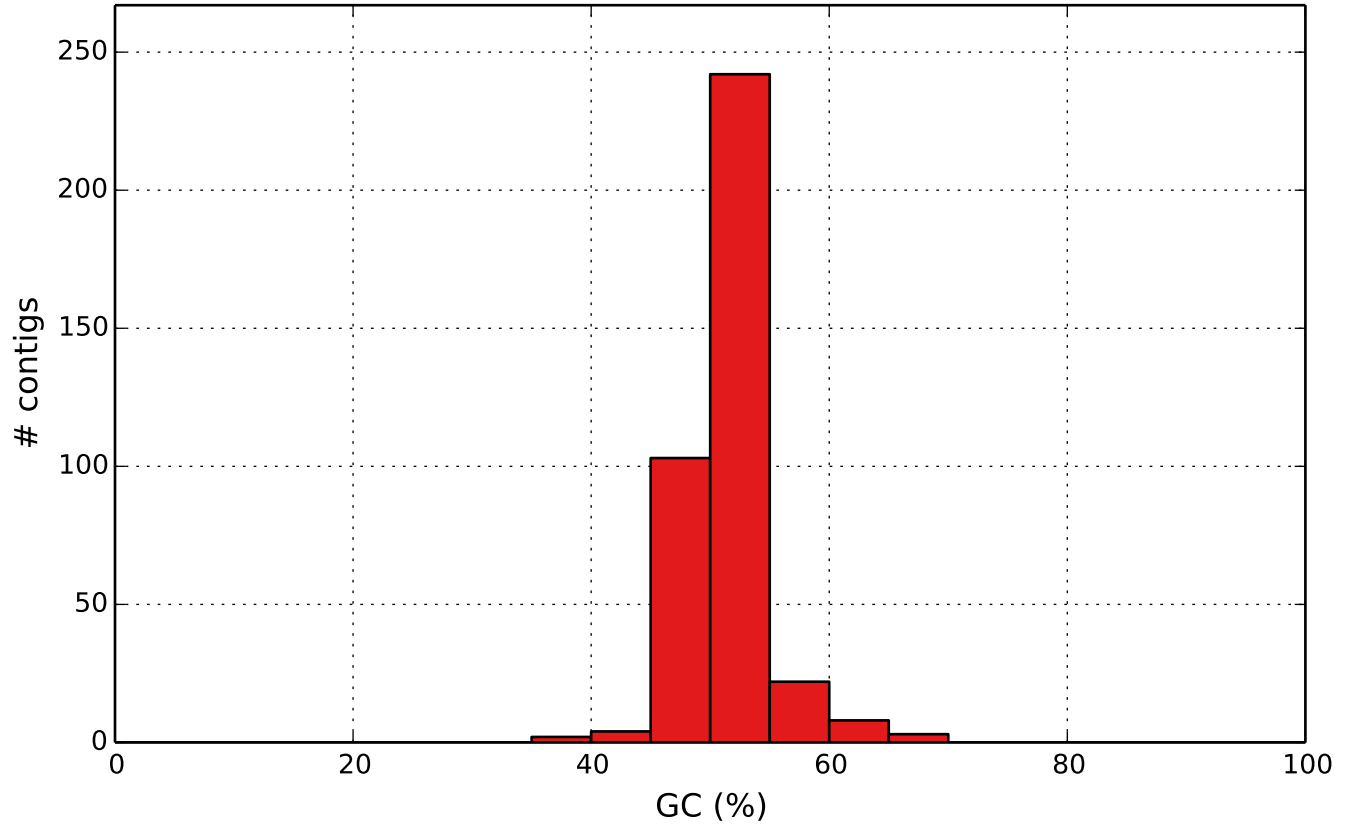

CV18\_spades\_contigs



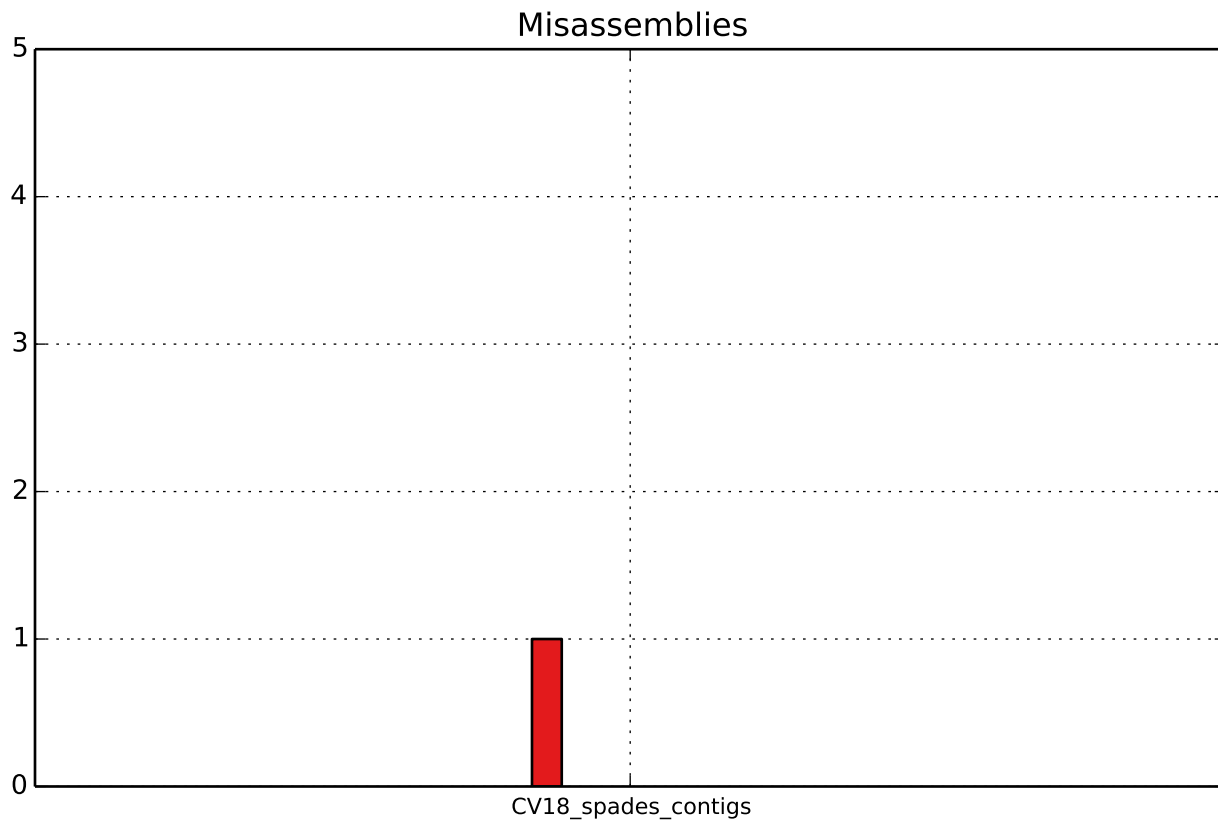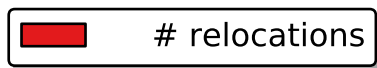

FRCurve (misassemblies)

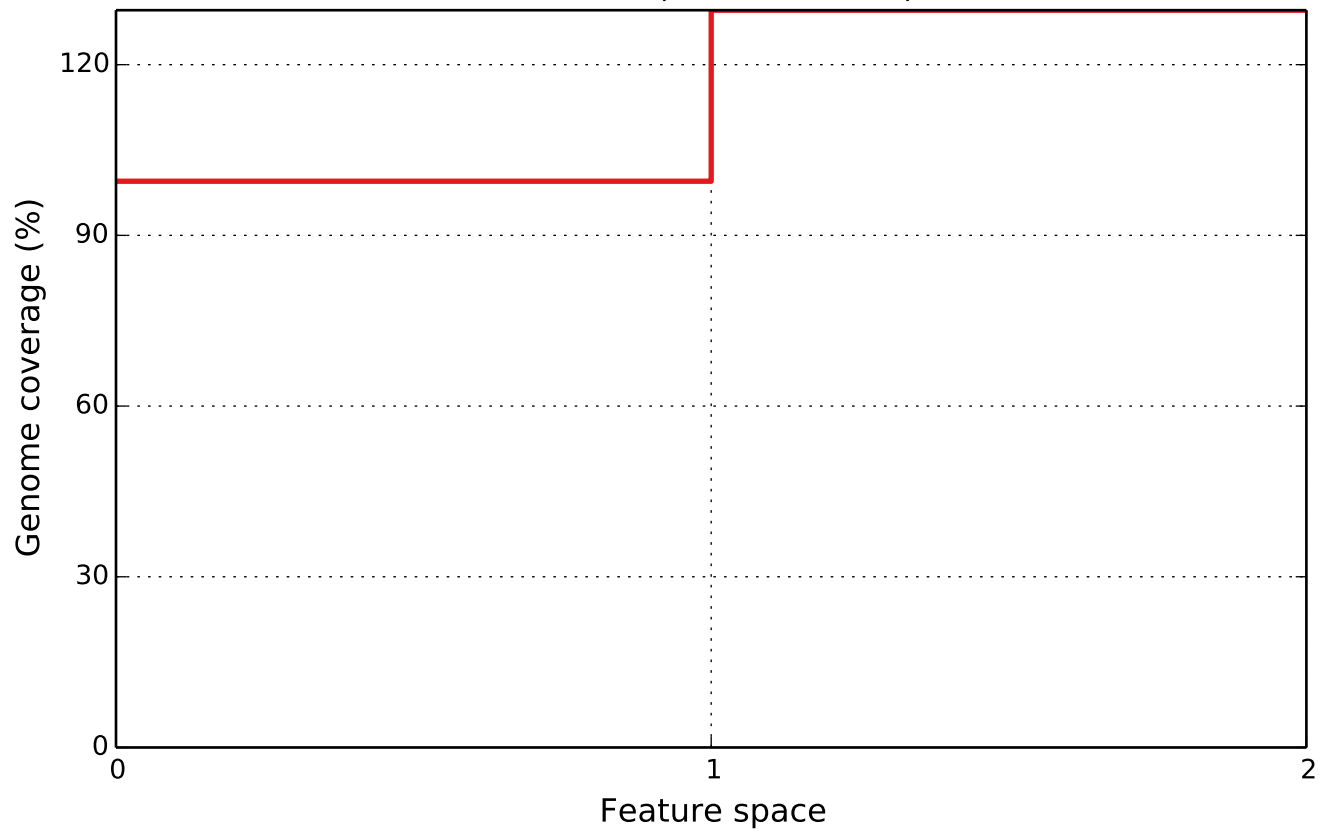

— CV18\_spades\_contigs

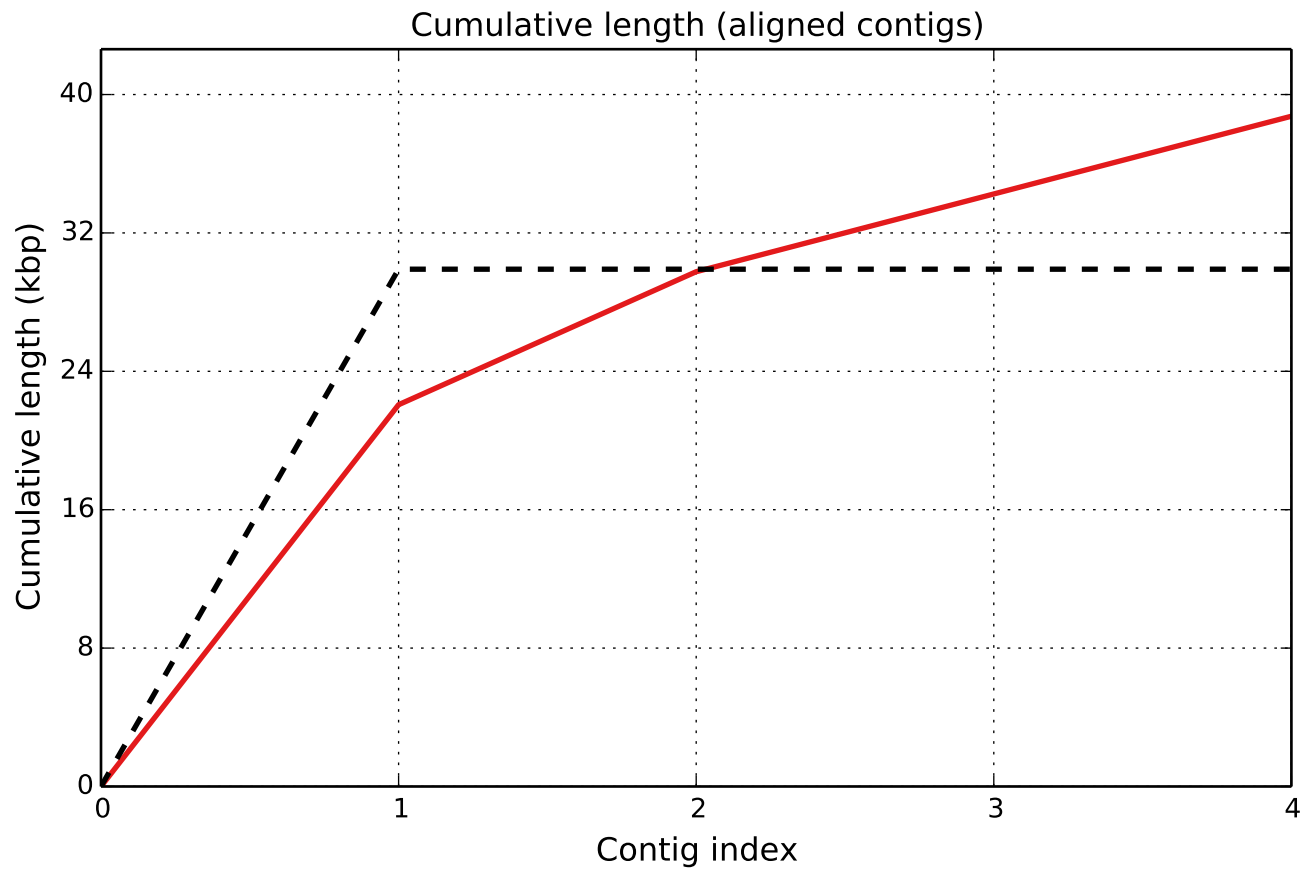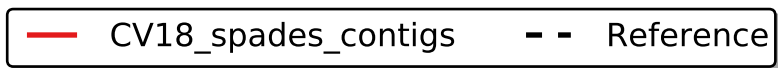

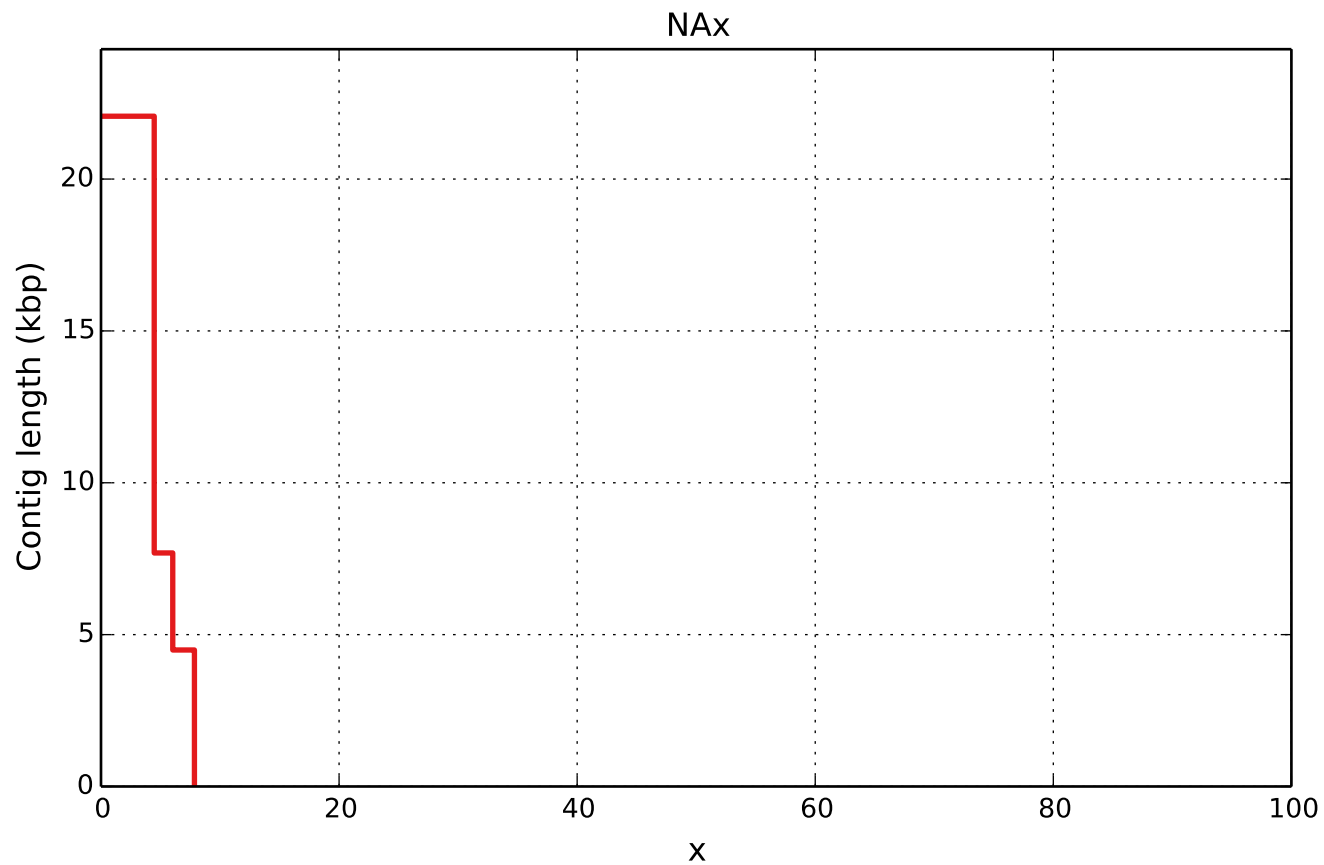

— CV18\_spades\_contigs

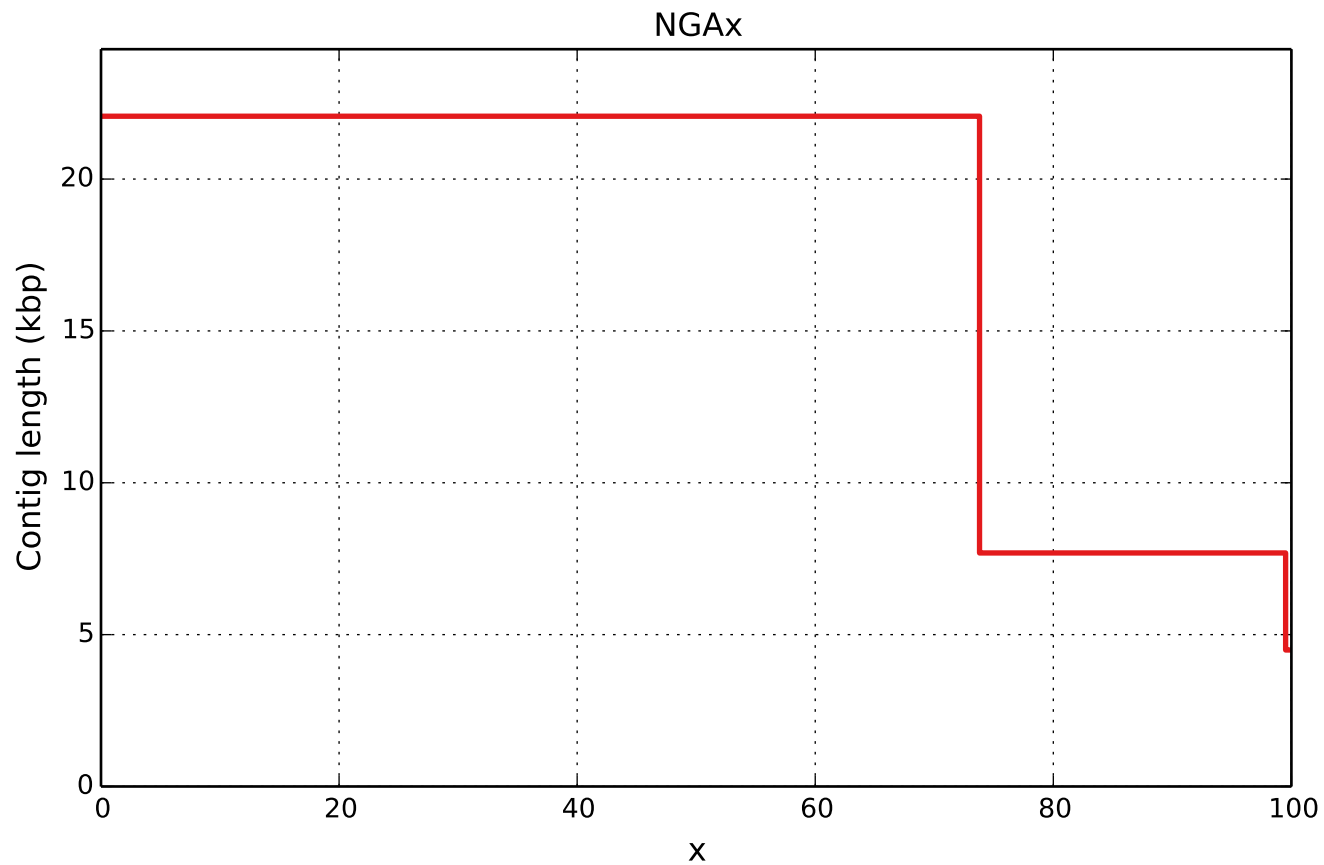

— CV18\_spades\_contigs

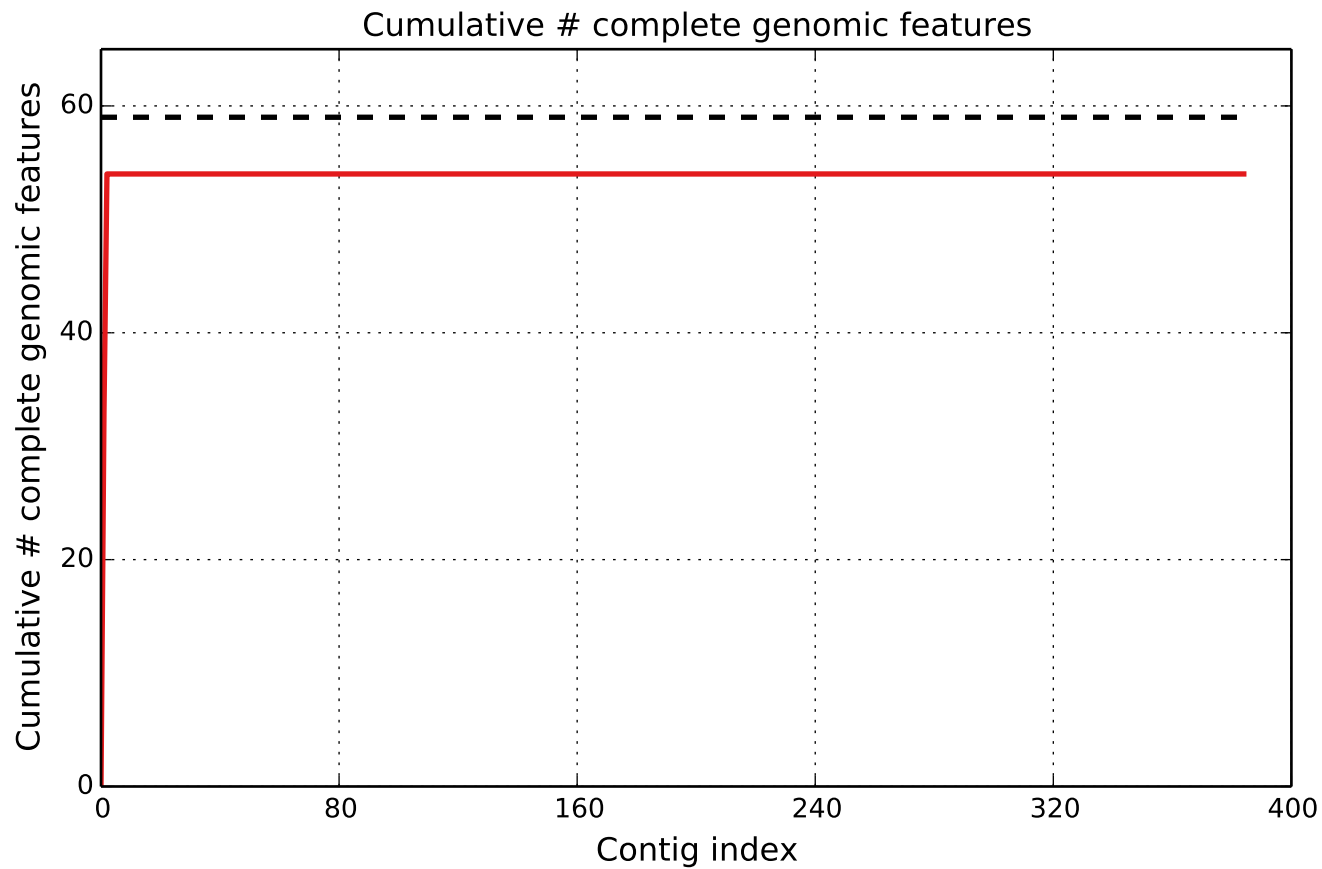

FRCurve (genomic features)

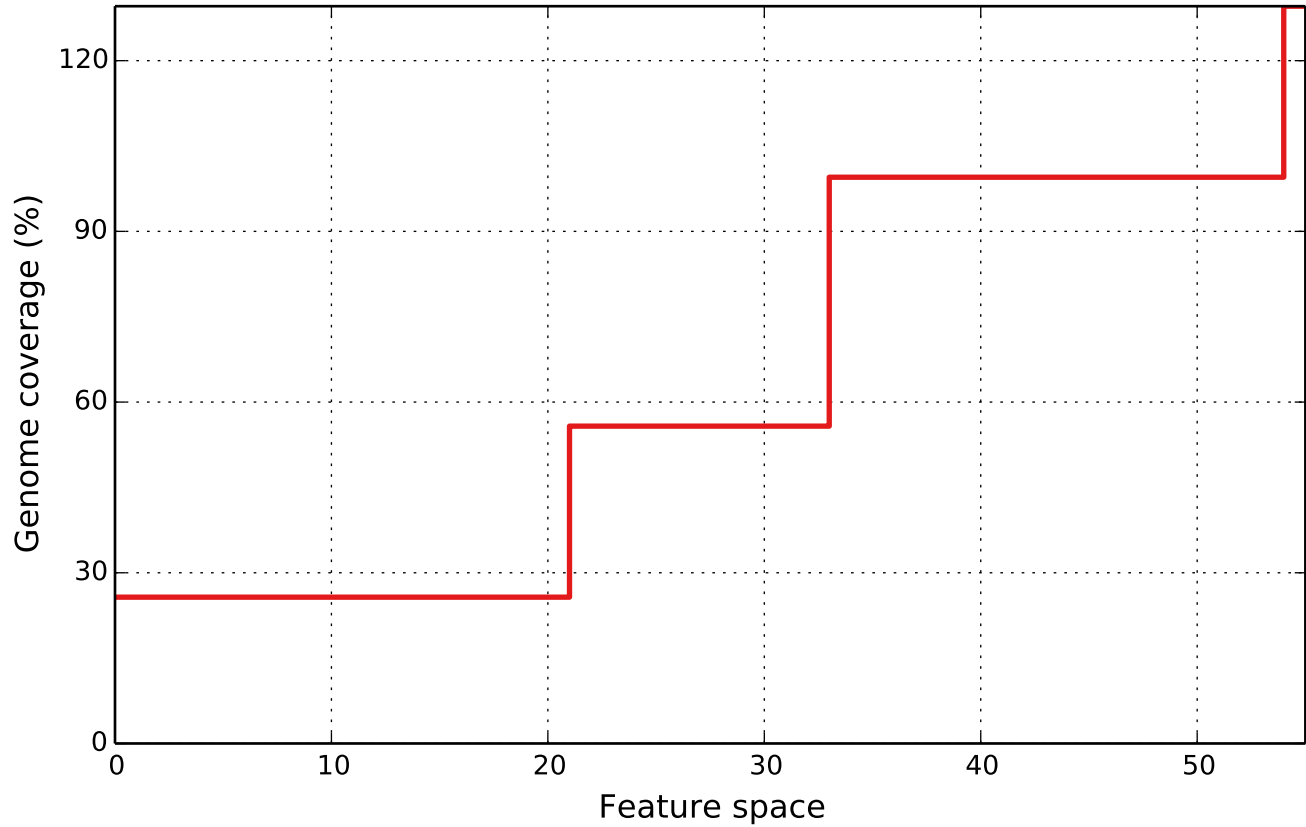

— CV18\_spades\_contigs
