# Supplementary material for: VGEA: an RNA viral assembly toolkit
Source: PeerJ journal article supplement (doi:10.7717/peerj.12129), 2021-09-06
Supplement: Supplementary_File_2.zip [file Supplementary_File_2.zip]

# Report

|                             | CV145_contigs |
|-----------------------------|---------------|
| # contigs (>= 0 bp)         | 28            |
| # contigs (>= 1000 bp)      | 20            |
| # contigs (>= 5000 bp)      | 1             |
| # contigs (>= 10000 bp)     | 0             |
| # contigs (>= 25000 bp)     | 0             |
| # contigs (>= 50000 bp)     | 0             |
| Total length (>= 0 bp)      | 51614         |
| Total length (>= 1000 bp)   | 44724         |
| Total length (>= 5000 bp)   | 6807          |
| Total length (>= 10000 bp)  | 0             |
| Total length (>= 25000 bp)  | 0             |
| Total length (>= 50000 bp)  | 0             |
| # contigs                   | 28            |
| Largest contig              | 6807          |
| Total length                | 51614         |
| Reference length            | 29903         |
| GC (%)                      | 45.65         |
| Reference GC (%)            | 37.97         |
| N50                         | 2049          |
| NG50                        | 4214          |
| N75                         | 1213          |
| NG75                        | 2413          |
| L50                         | 7             |
| LG50                        | 3             |
| L75                         | 15            |
| LG75                        | 6             |
| # misassemblies             | 0             |
| # misassembled contigs      | 0             |
| Misassembled contigs length | 0             |
| # local misassemblies       | 0             |
| # scaffold gap ext. mis.    | 0             |
| # scaffold gap loc. mis.    | 0             |
| # unaligned mis. contigs    | 0             |
| # unaligned contigs         | 22 + 0 part   |
| Unaligned length            | 29418         |
| Genome fraction (%)         | 73.093        |
| Duplication ratio           | 1.016         |
| # N's per 100 kbp           | 0.00          |
| # mismatches per 100 kbp    | 64.05         |
| # indels per 100 kbp        | 0.00          |
| # genomic features          | 29 + 17 part  |
| Largest alignment           | 6734          |
| Total aligned length        | 21984         |
| NGA50                       | 4214          |
| LGA50                       | 3             |

All statistics are based on contigs of size >= 500 bp, unless otherwise noted (e.g., "# contigs (>= 0 bp)" and "Total length (>= 0 bp)" include all contigs).

## Misassemblies report

|                             | CV145_contigs |
|-----------------------------|---------------|
| # misassemblies             | 0             |
| # contig misassemblies      | 0             |
| # c. relocations            | 0             |
| # c. translocations         | 0             |
| # c. inversions             | 0             |
| # scaffold misassemblies    | 0             |
| # s. relocations            | 0             |
| # s. translocations         | 0             |
| # s. inversions             | 0             |
| # misassembled contigs      | 0             |
| Misassembled contigs length | 0             |
| # local misassemblies       | 0             |
| # scaffold gap ext. mis.    | 0             |
| # scaffold gap loc. mis.    | 0             |
| # unaligned mis. contigs    | 0             |
| # mismatches                | 14            |
| # indels                    | 0             |
| # indels (<= 5 bp)          | 0             |
| # indels (> 5 bp)           | 0             |
| Indels length               | 0             |

All statistics are based on contigs of size  $\geq 500$  bp, unless otherwise noted (e.g., "# contigs ( $\geq 0$  bp)" and "Total length ( $\geq 0$  bp)" include all contigs).

## Unaligned report

|                               | CV145_contigs |
|-------------------------------|---------------|
| # fully unaligned contigs     | 22            |
| Fully unaligned length        | 29418         |
| # partially unaligned contigs | 0             |
| Partially unaligned length    | 0             |
| # N's                         | 0             |

All statistics are based on contigs of size  $\geq 500$  bp, unless otherwise noted (e.g., "# contigs ( $\geq 0$  bp)" and "Total length ( $\geq 0$  bp)" include all contigs).

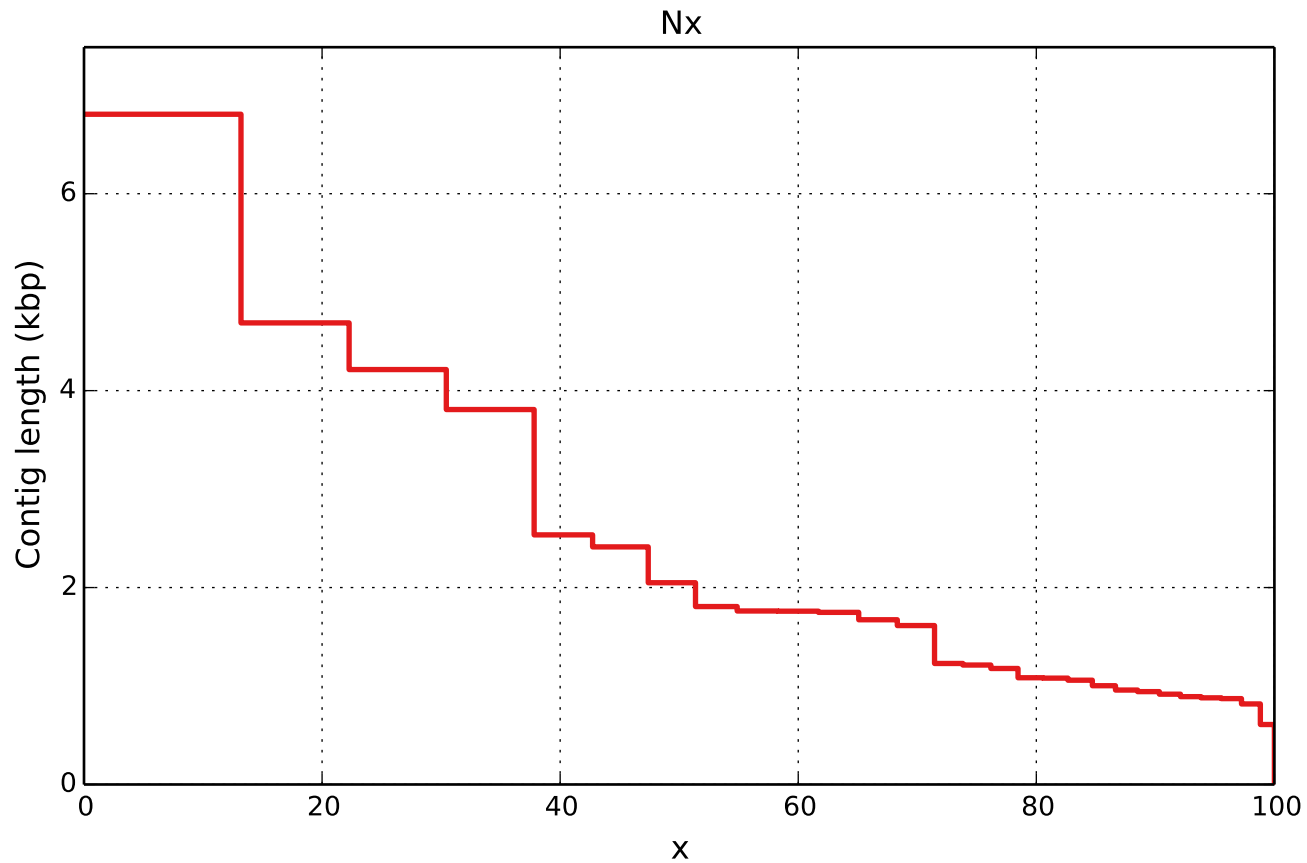

— CV145\_contigs

NGx

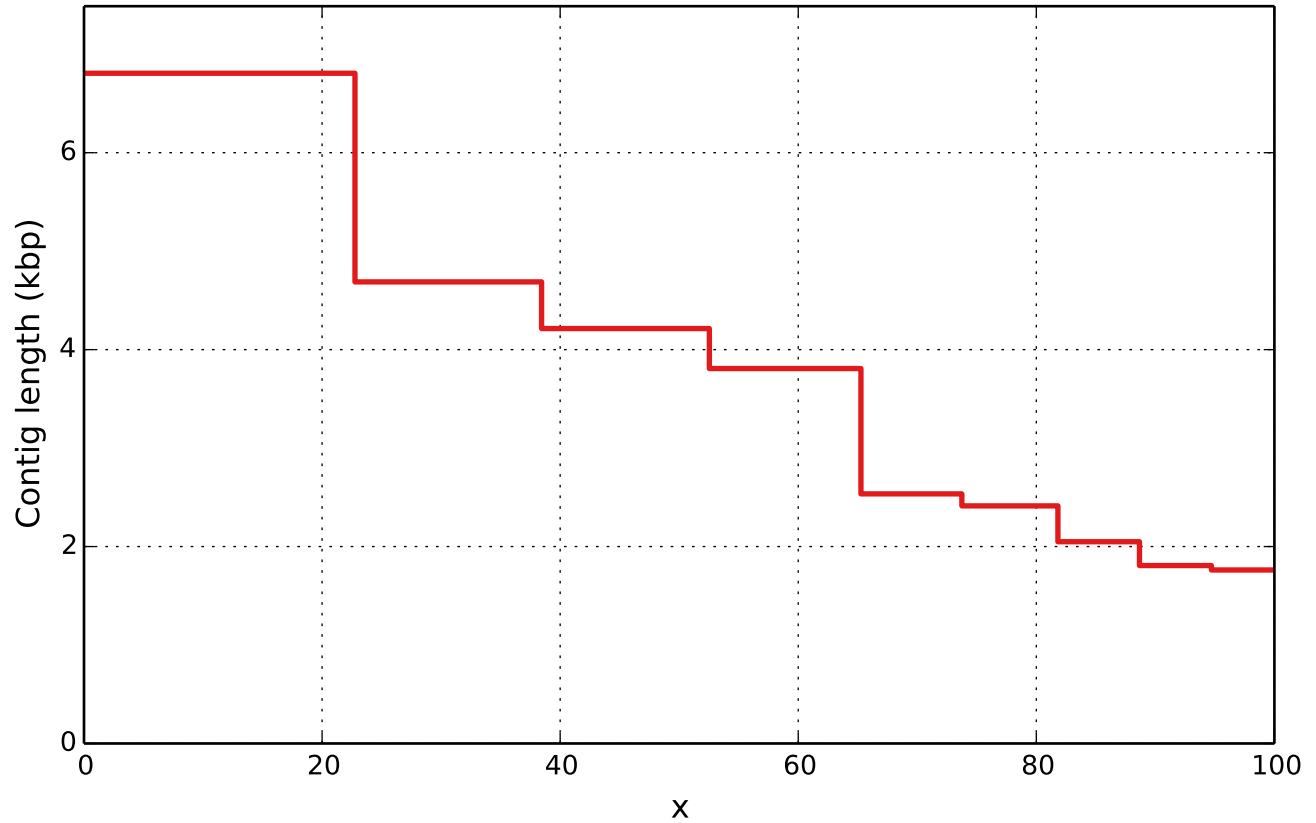

— CV145\_contigs

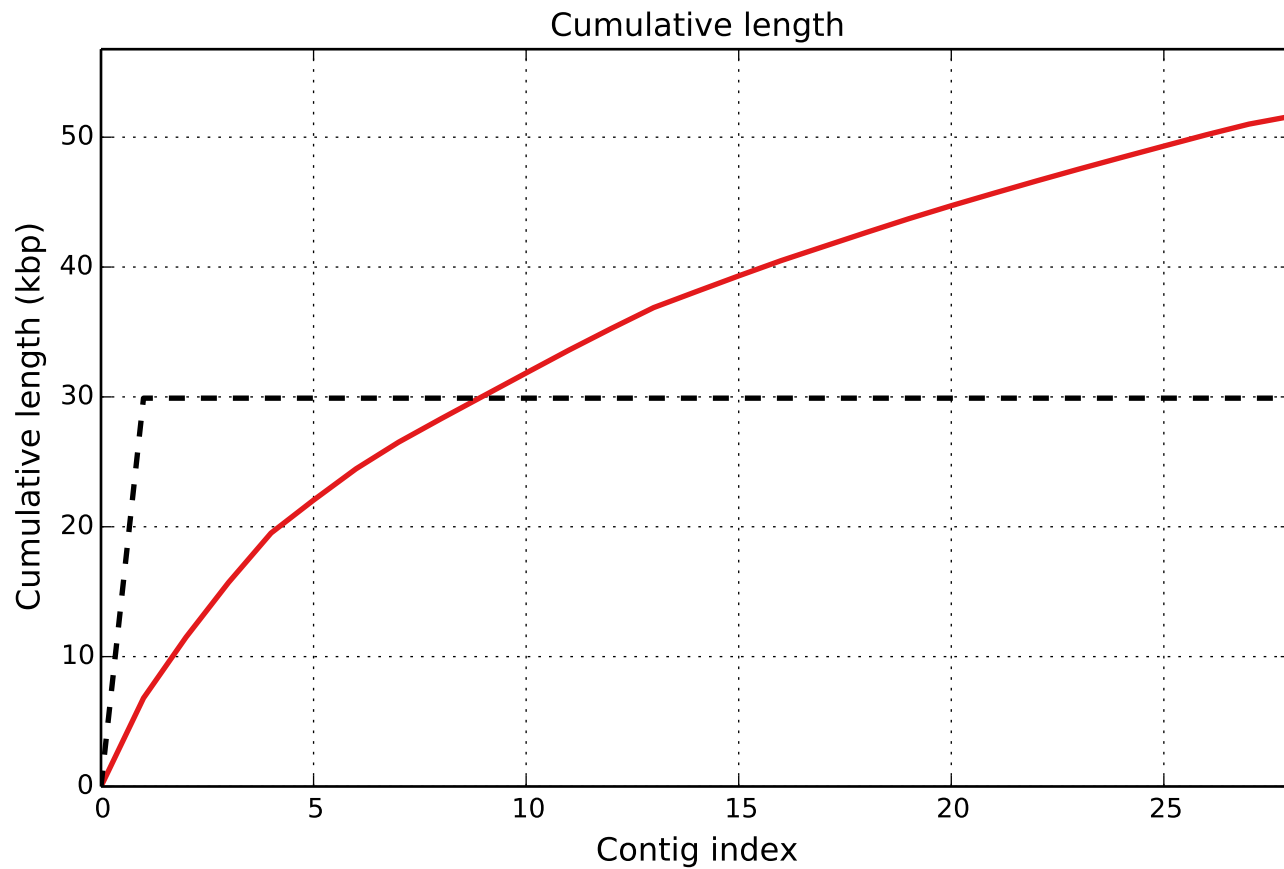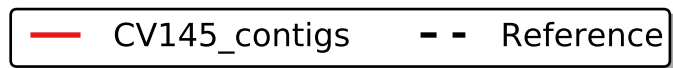

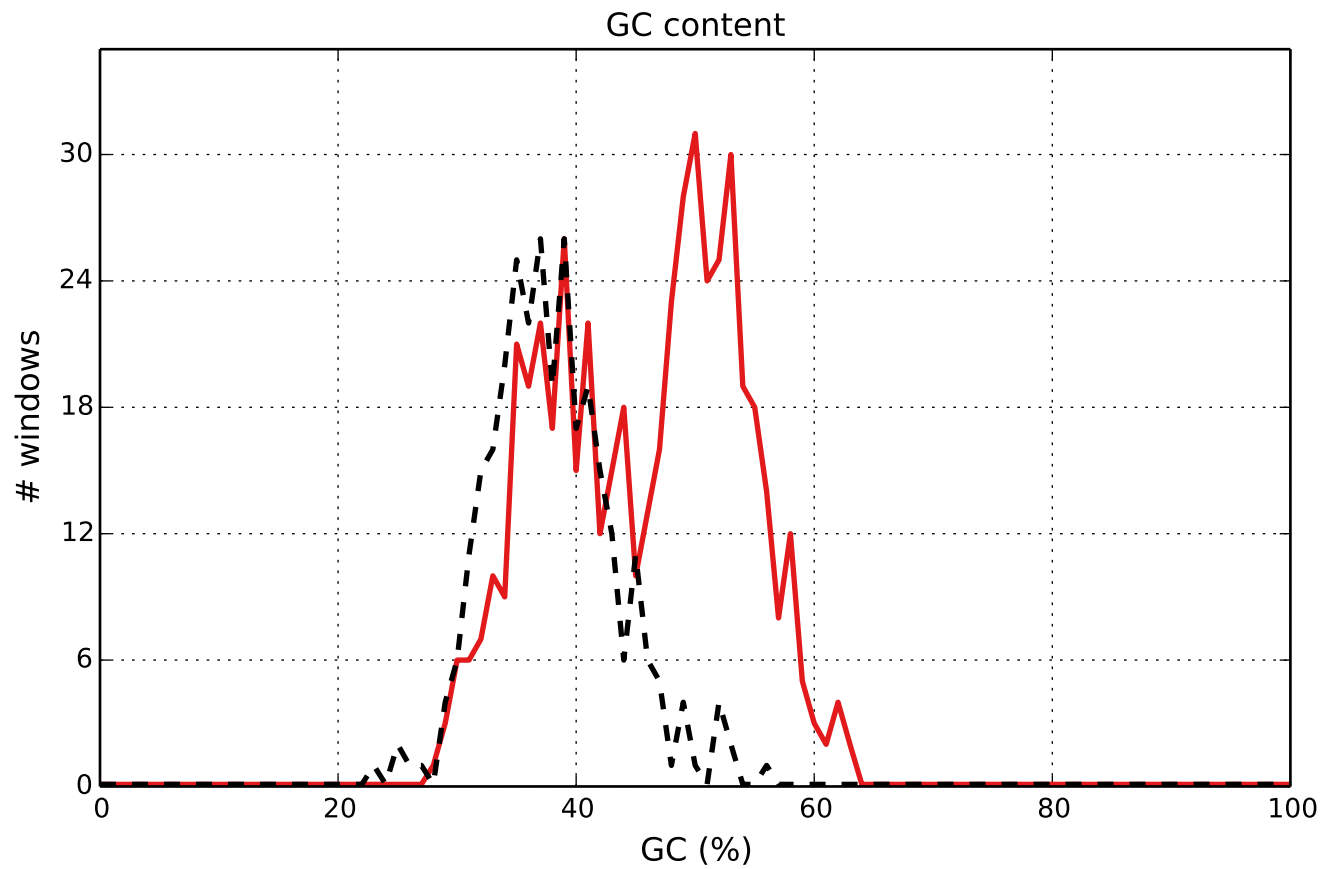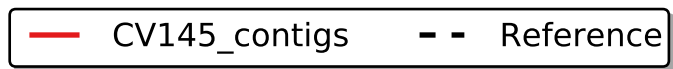

CV145\_contigs GC content

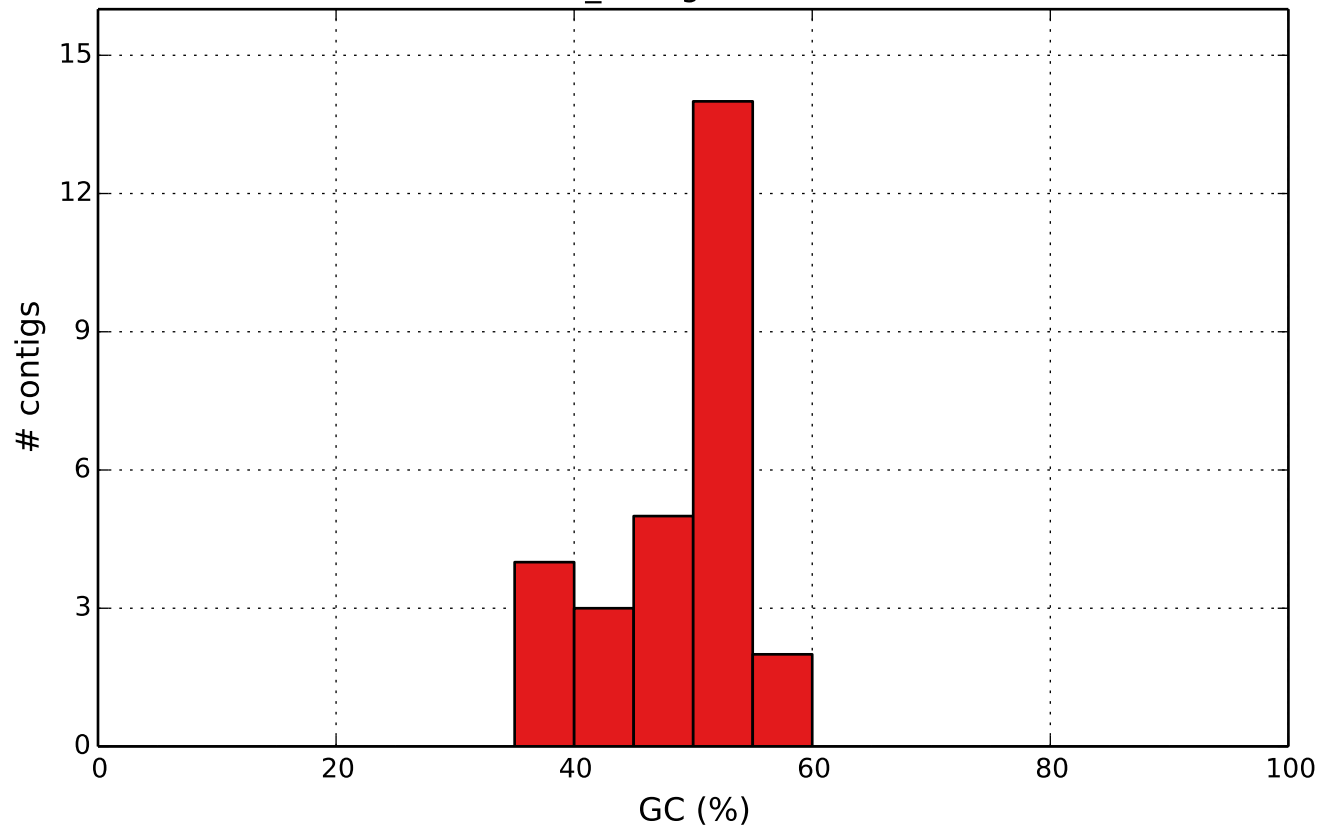

CV145\_contigs



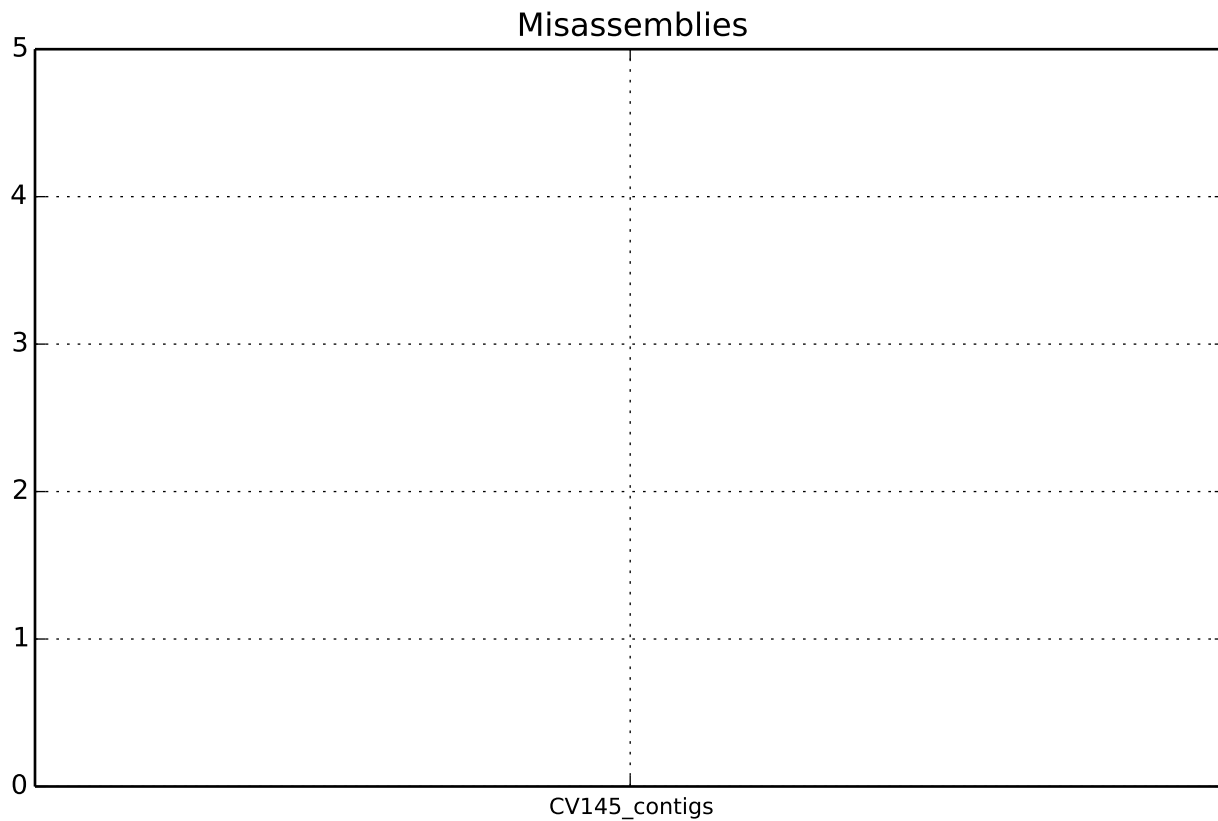

FRCurve (misassemblies)

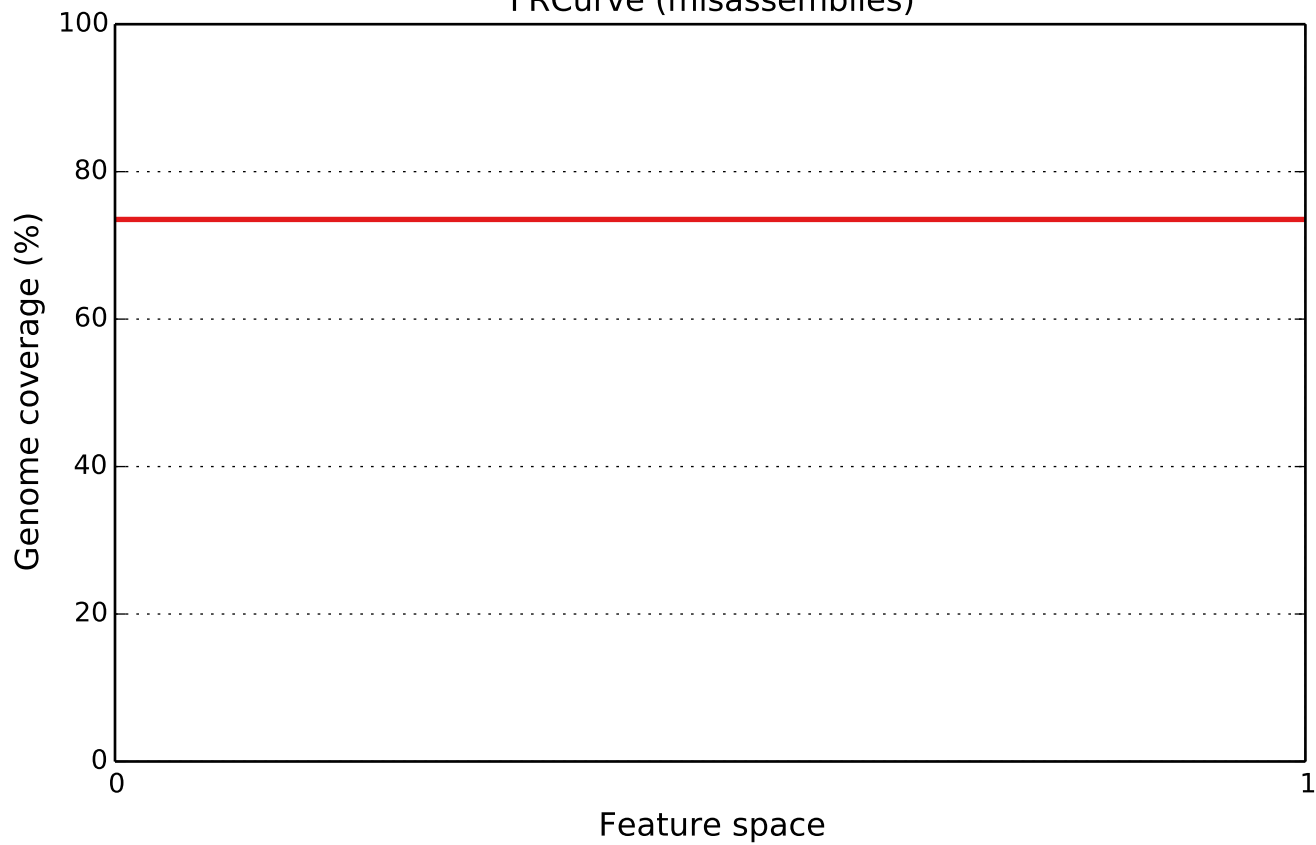

— CV145\_contigs

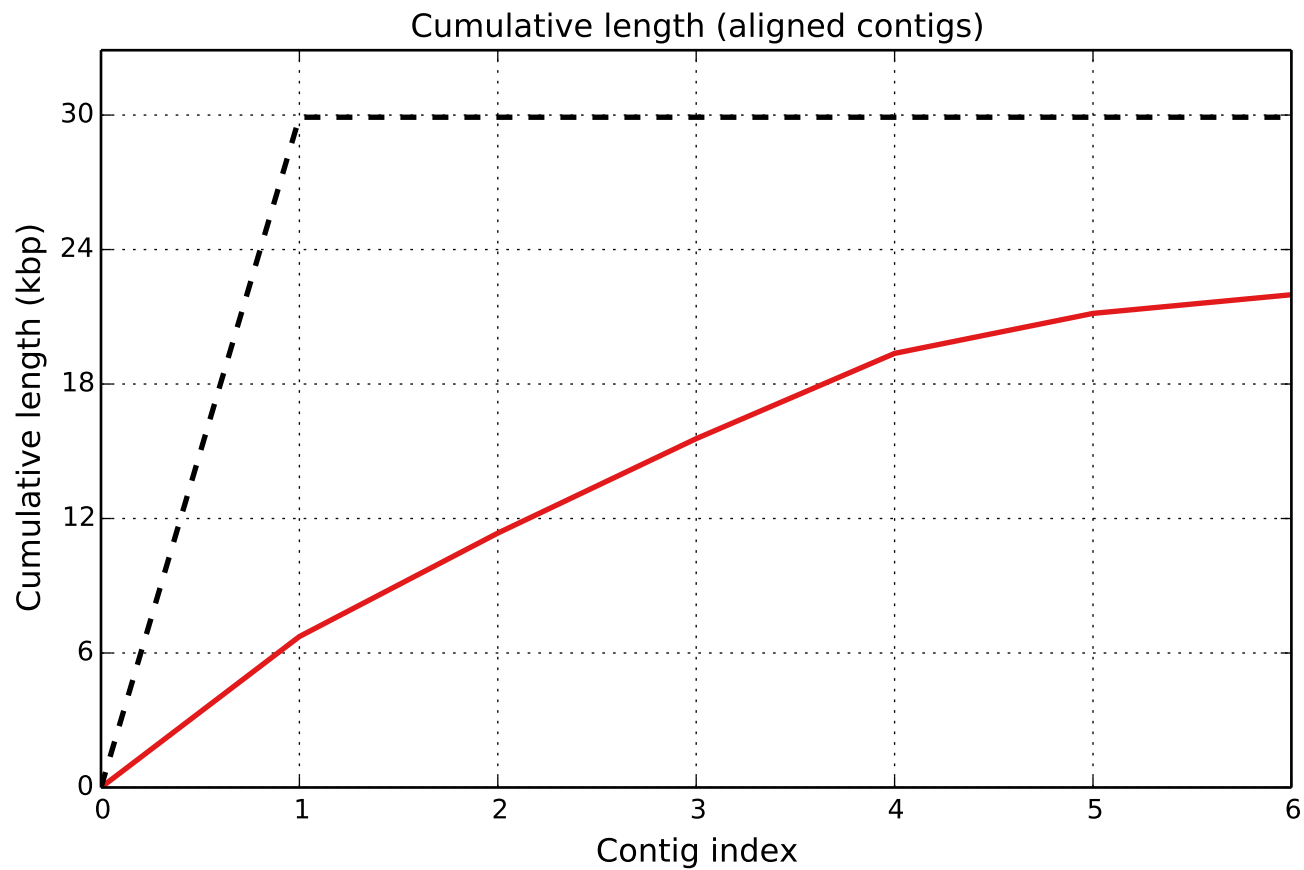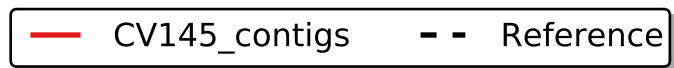

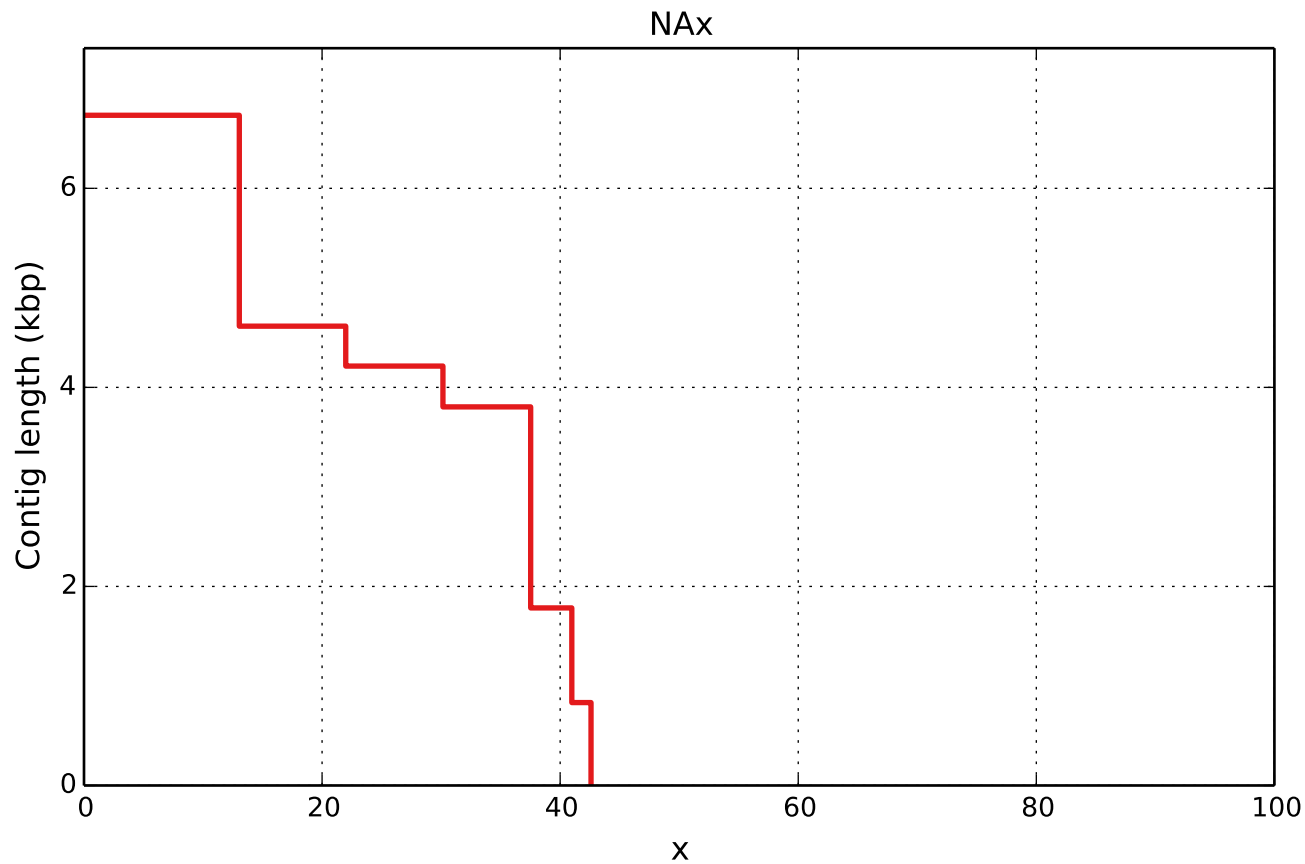

— CV145\_contigs

NGAx

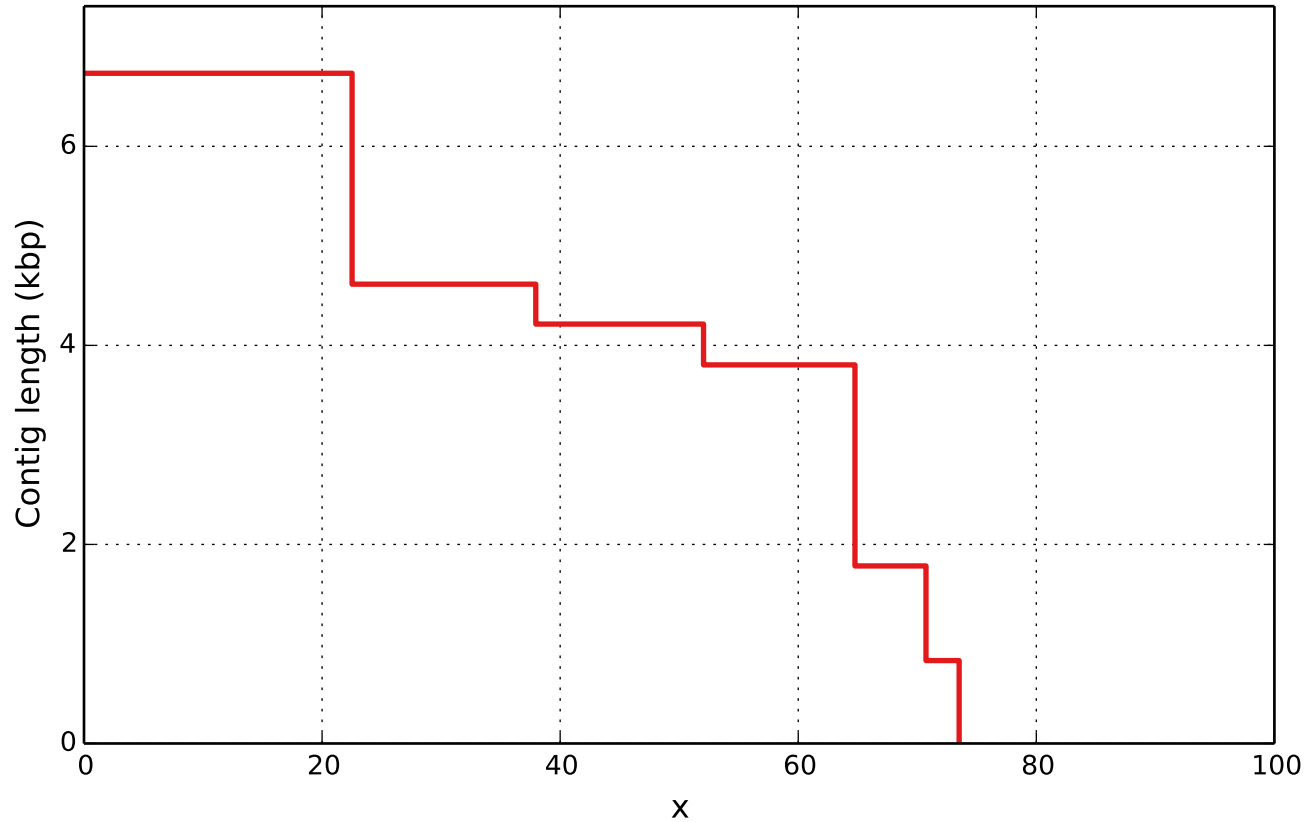

— CV145\_contigs

Cumulative # complete genomic features

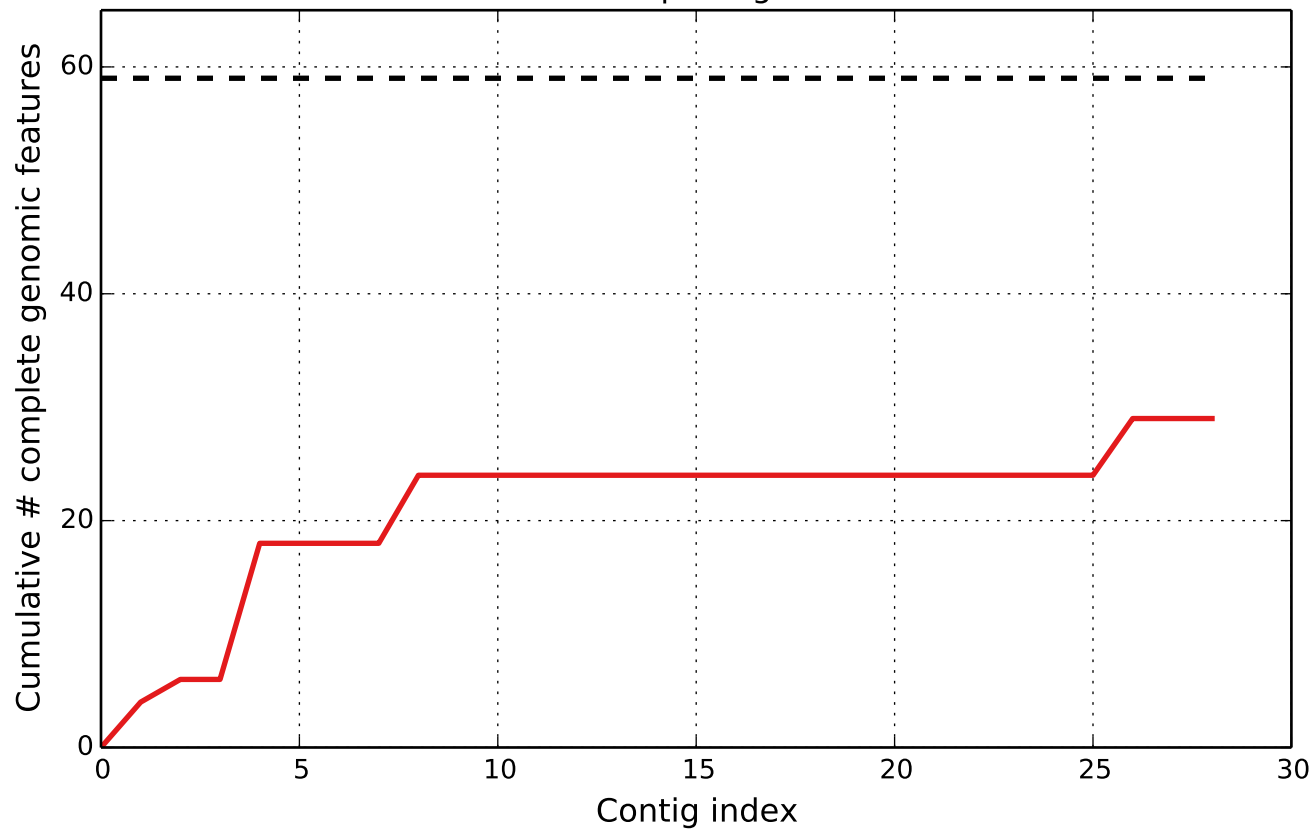

FRCurve (genomic features)

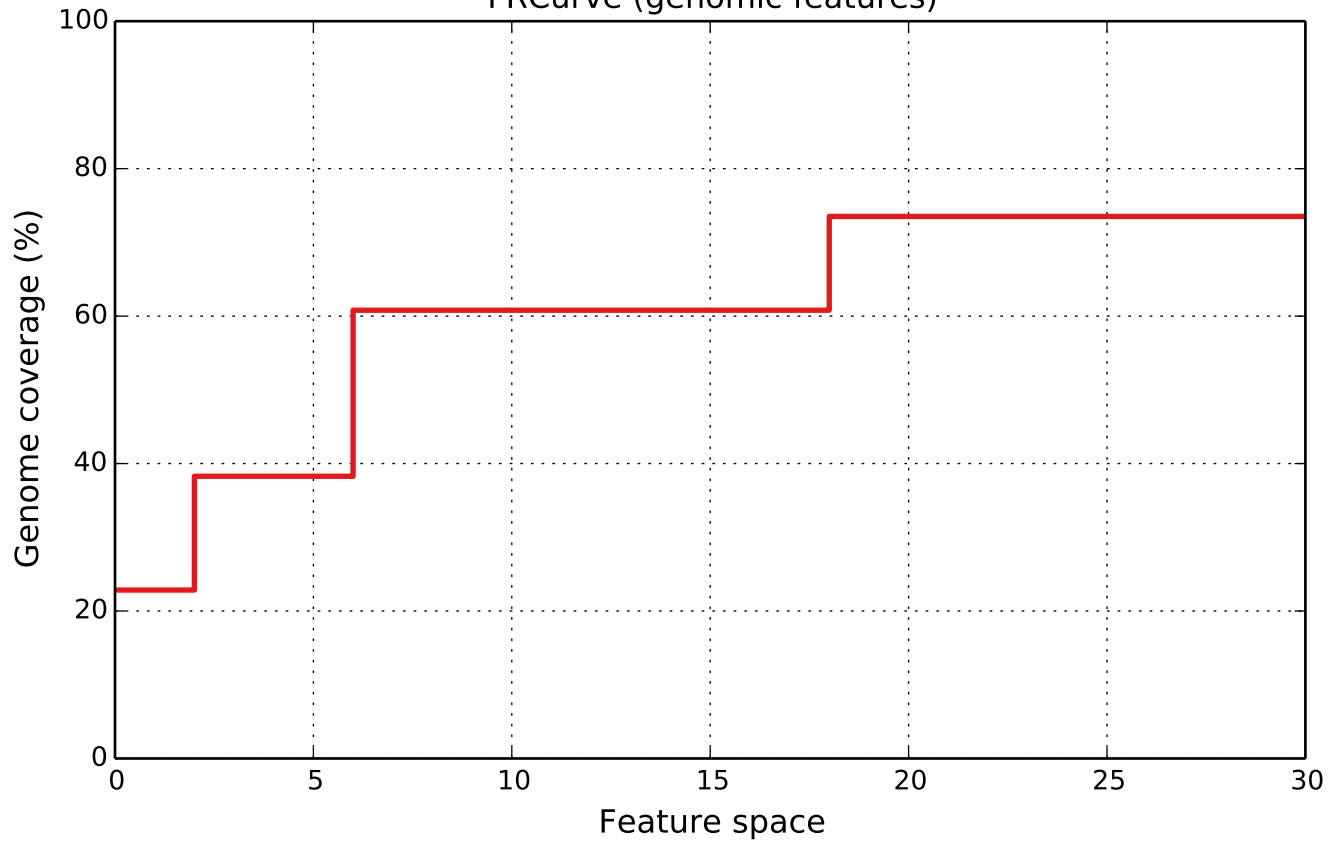

— CV145\_contigs
