# Supplementary material for: VGEA: an RNA viral assembly toolkit
Source: PeerJ journal article supplement (doi:10.7717/peerj.12129), 2021-09-06
Supplement: Supplementary_File_2.zip [file Supplementary_File_2.zip]

# Report

|                             | CV29_spades_contigs |
|-----------------------------|---------------------|
| # contigs (>= 0 bp)         | 2165                |
| # contigs (>= 1000 bp)      | 144                 |
| # contigs (>= 5000 bp)      | 2                   |
| # contigs (>= 10000 bp)     | 2                   |
| # contigs (>= 25000 bp)     | 0                   |
| # contigs (>= 50000 bp)     | 0                   |
| Total length (>= 0 bp)      | 961507              |
| Total length (>= 1000 bp)   | 283492              |
| Total length (>= 5000 bp)   | 42733               |
| Total length (>= 10000 bp)  | 42733               |
| Total length (>= 25000 bp)  | 0                   |
| Total length (>= 50000 bp)  | 0                   |
| # contigs                   | 478                 |
| Largest contig              | 24904               |
| Total length                | 511049              |
| Reference length            | 29903               |
| GC (%)                      | 43.71               |
| Reference GC (%)            | 37.97               |
| N50                         | 1136                |
| NG50                        | 24904               |
| N75                         | 716                 |
| NG75                        | 24904               |
| L50                         | 118                 |
| LG50                        | 1                   |
| L75                         | 262                 |
| LG75                        | 1                   |
| # misassemblies             | 0                   |
| # misassembled contigs      | 0                   |
| Misassembled contigs length | 0                   |
| # local misassemblies       | 0                   |
| # scaffold gap ext. mis.    | 0                   |
| # scaffold gap loc. mis.    | 0                   |
| # unaligned mis. contigs    | 0                   |
| # unaligned contigs         | 476 + 0 part        |
| Unaligned length            | 481208              |
| Genome fraction (%)         | 99.632              |
| Duplication ratio           | 1.002               |
| # N's per 100 kbp           | 0.00                |
| # mismatches per 100 kbp    | 23.50               |
| # indels per 100 kbp        | 0.00                |
| # genomic features          | 54 + 5 part         |
| Largest alignment           | 24904               |
| Total aligned length        | 29793               |
| NGA50                       | 24904               |
| NGA75                       | 24904               |
| LGA50                       | 1                   |
| LGA75                       | 1                   |

All statistics are based on contigs of size >= 500 bp, unless otherwise noted (e.g., "# contigs (>= 0 bp)" and "Total length (>= 0 bp)" include all contigs).

## Misassemblies report

|                             | CV29_spades_contigs |
|-----------------------------|---------------------|
| # misassemblies             | 0                   |
| # contig misassemblies      | 0                   |
| # c. relocations            | 0                   |
| # c. translocations         | 0                   |
| # c. inversions             | 0                   |
| # scaffold misassemblies    | 0                   |
| # s. relocations            | 0                   |
| # s. translocations         | 0                   |
| # s. inversions             | 0                   |
| # misassembled contigs      | 0                   |
| Misassembled contigs length | 0                   |
| # local misassemblies       | 0                   |
| # scaffold gap ext. mis.    | 0                   |
| # scaffold gap loc. mis.    | 0                   |
| # unaligned mis. contigs    | 0                   |
| # mismatches                | 7                   |
| # indels                    | 0                   |
| # indels (<= 5 bp)          | 0                   |
| # indels (> 5 bp)           | 0                   |
| Indels length               | 0                   |

All statistics are based on contigs of size  $\geq 500$  bp, unless otherwise noted (e.g., "# contigs ( $\geq 0$  bp)" and "Total length ( $\geq 0$  bp)" include all contigs).

## Unaligned report

|                               | CV29_spades_contigs |
|-------------------------------|---------------------|
| # fully unaligned contigs     | 476                 |
| Fully unaligned length        | 481208              |
| # partially unaligned contigs | 0                   |
| Partially unaligned length    | 0                   |
| # N's                         | 0                   |

All statistics are based on contigs of size  $\geq 500$  bp, unless otherwise noted (e.g., "# contigs ( $\geq 0$  bp)" and "Total length ( $\geq 0$  bp)" include all contigs).

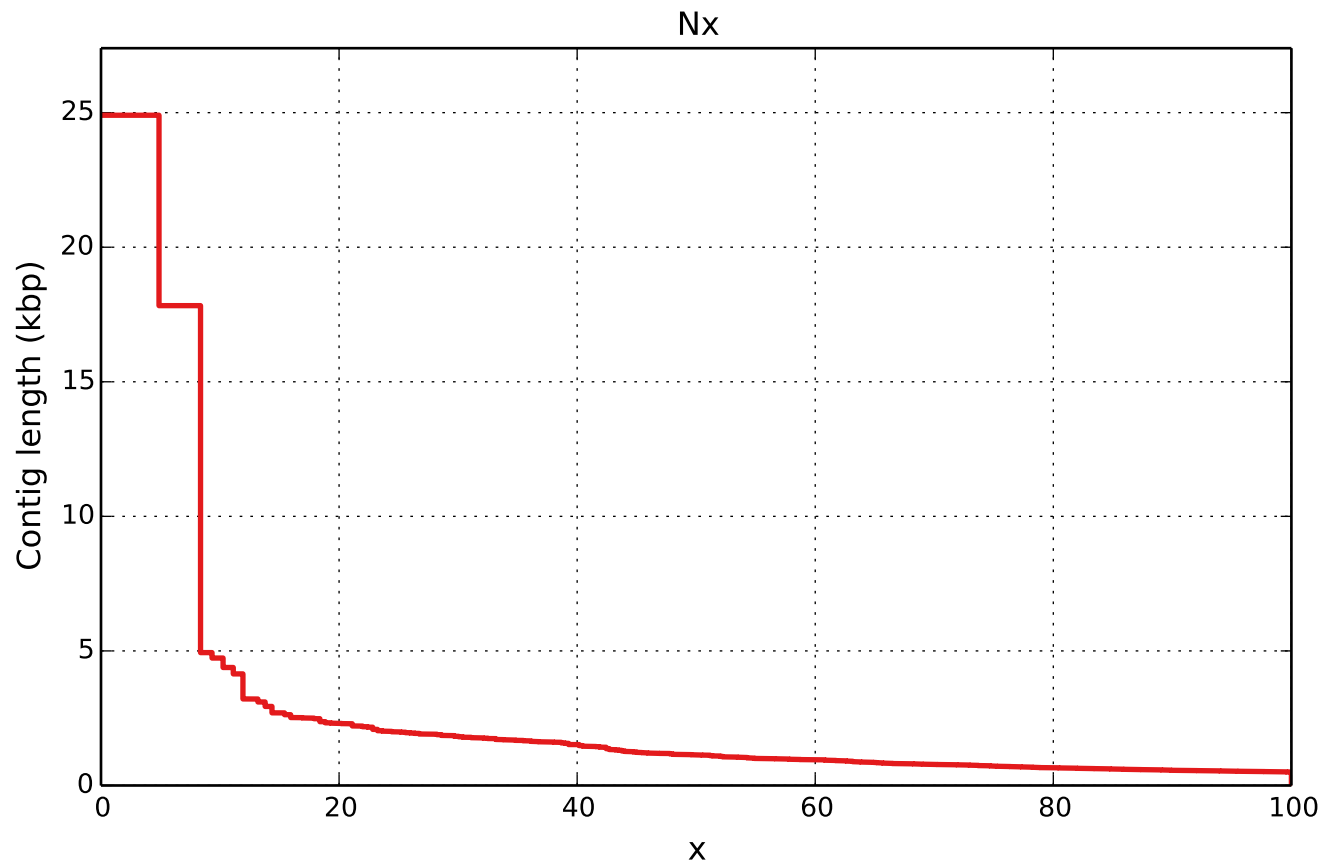

— CV29\_spades\_contigs

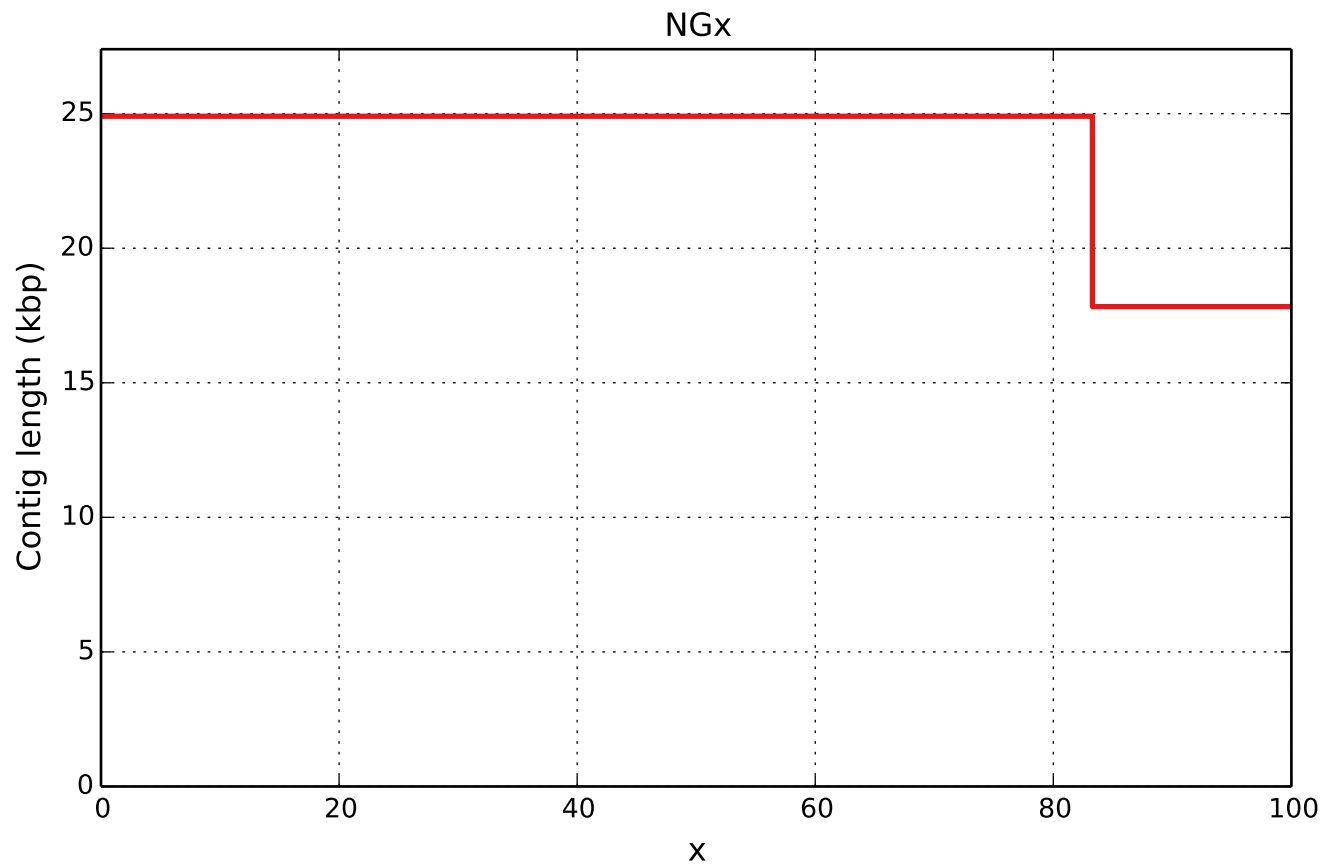

— CV29\_spades\_contigs

Cumulative length

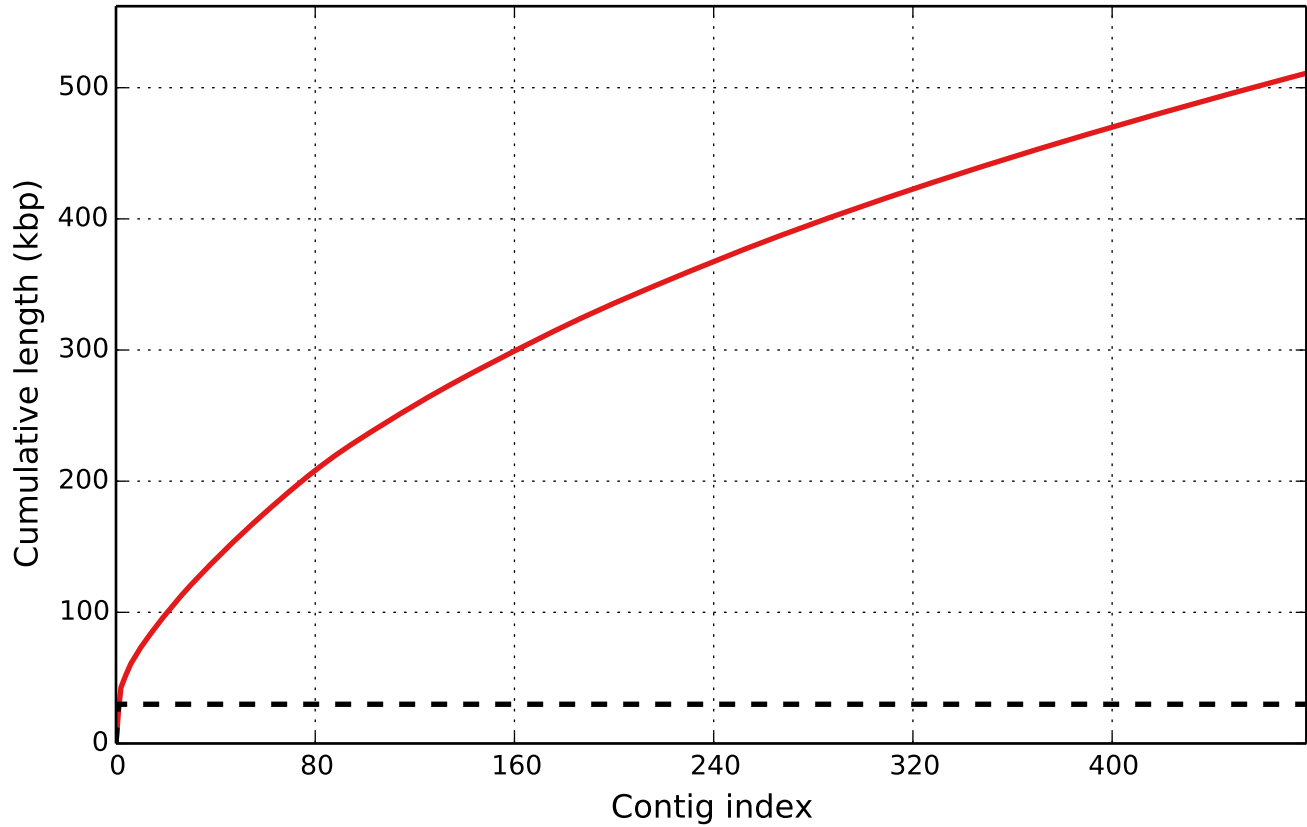

— CV29\_spades\_contigs    - - Reference

# GC content

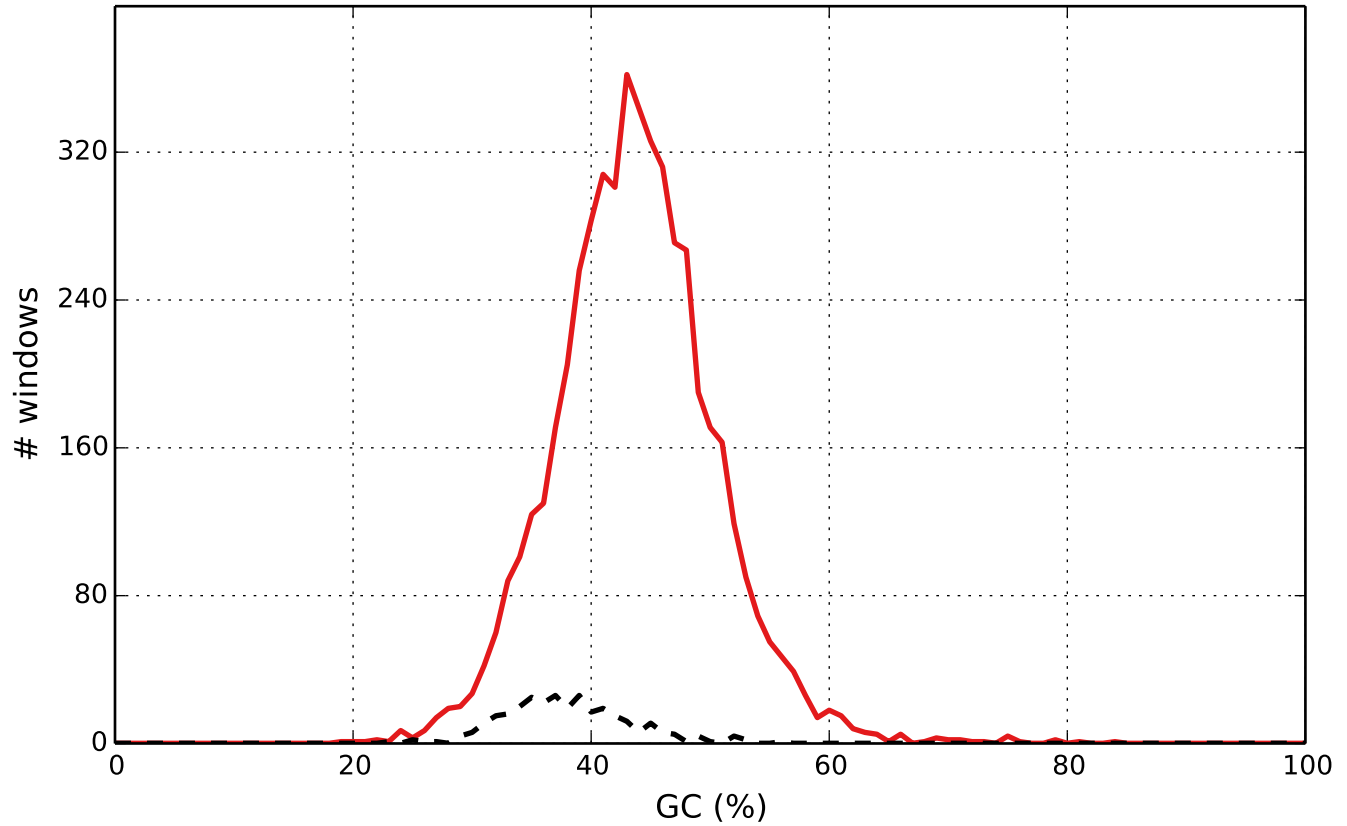

— CV29\_spades\_contigs    - - Reference

CV29\_spades\_contigs GC content

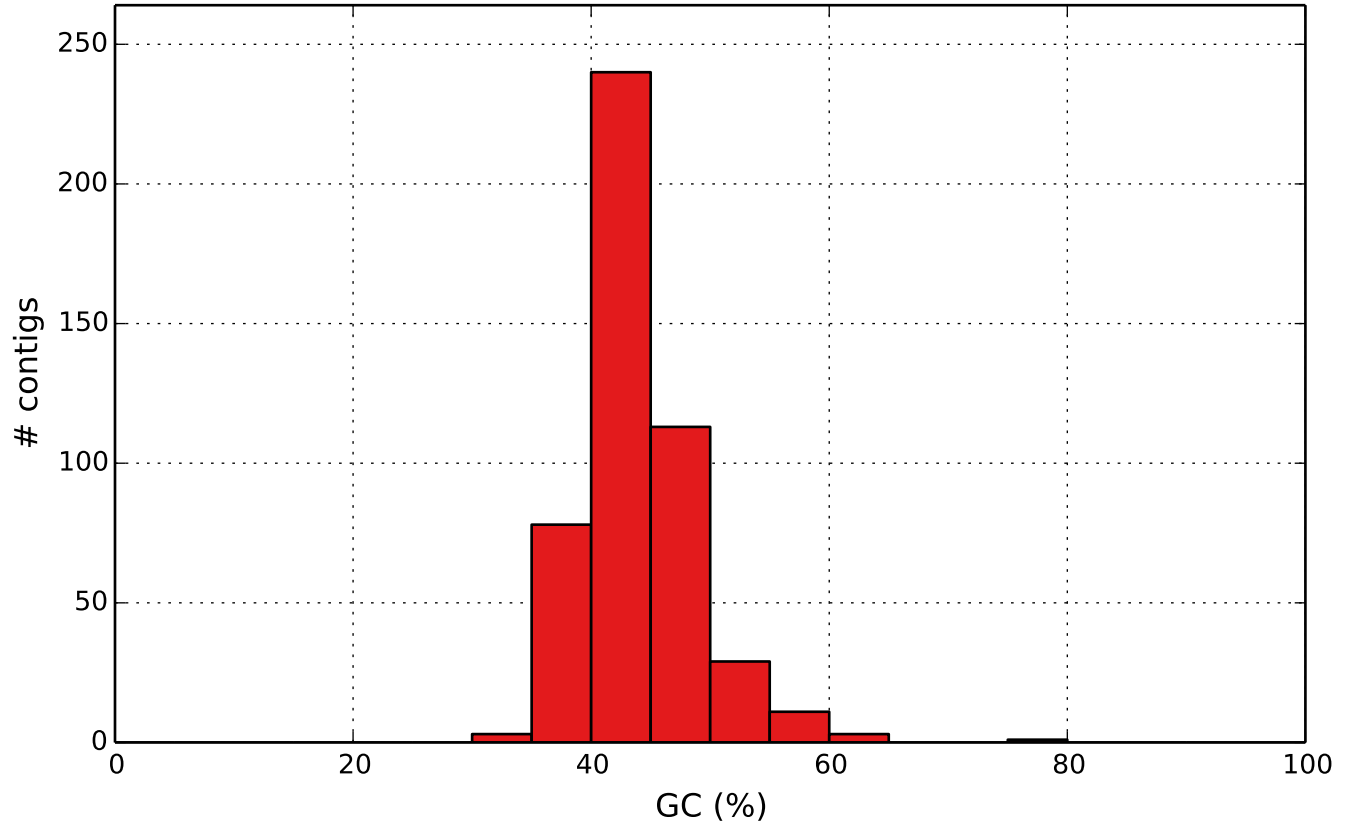

CV29\_spades\_contigs



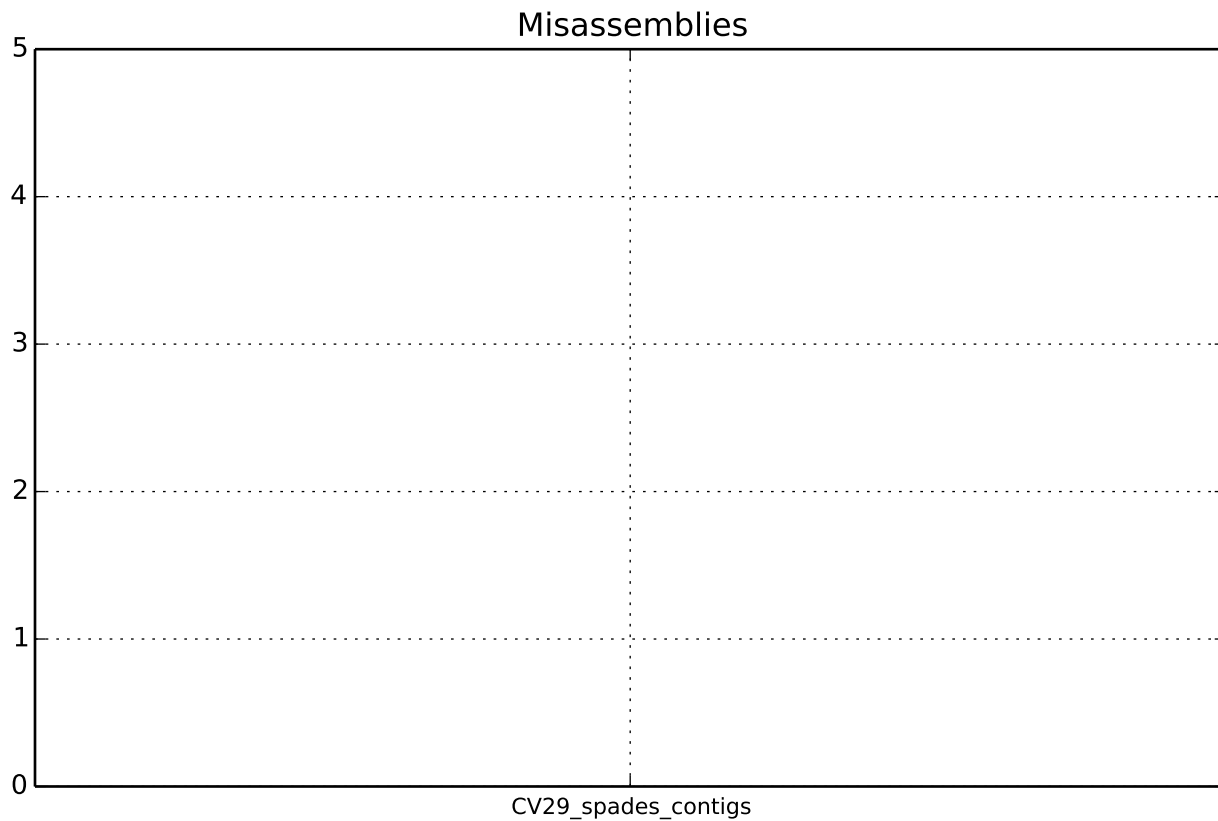

FRCurve (misassemblies)

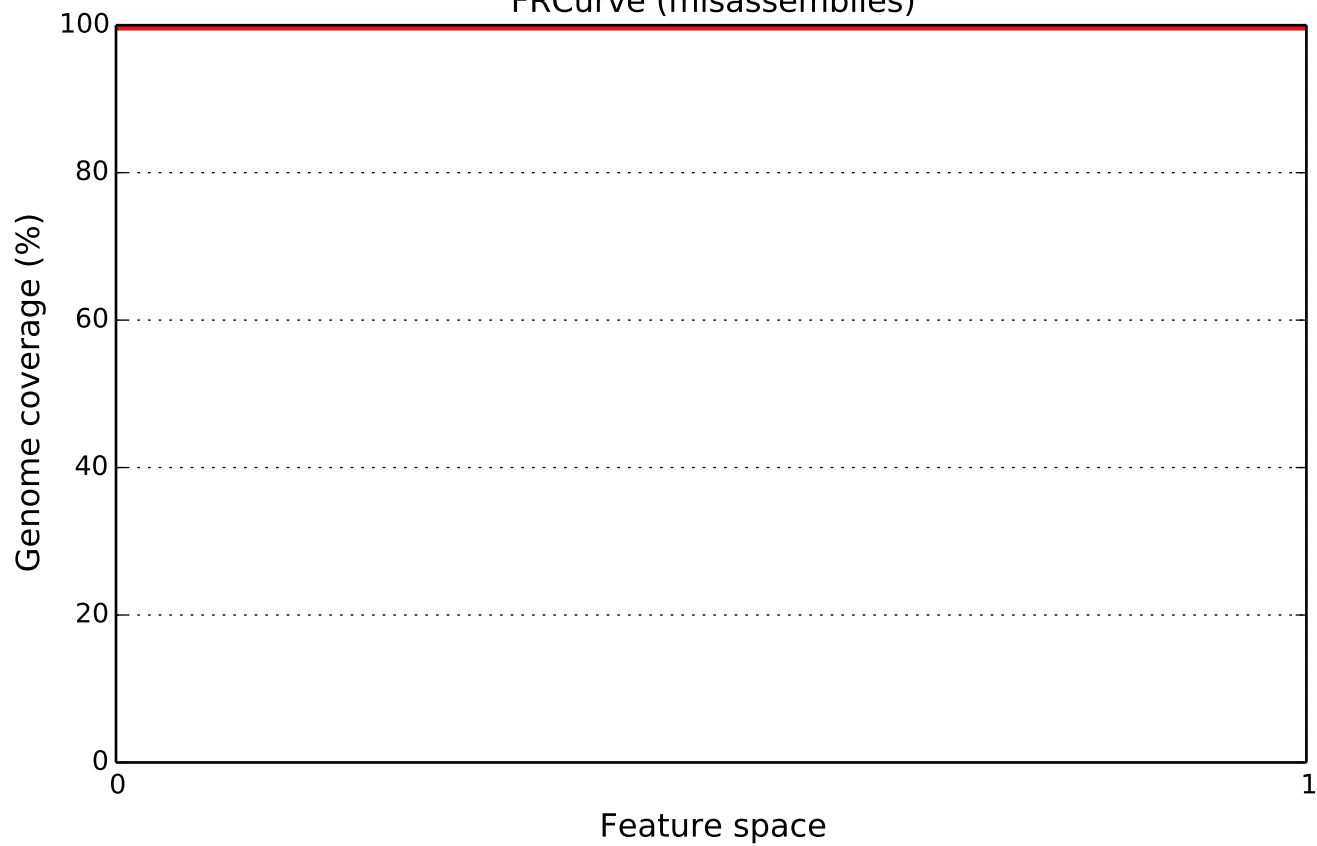

— CV29\_spades\_contigs

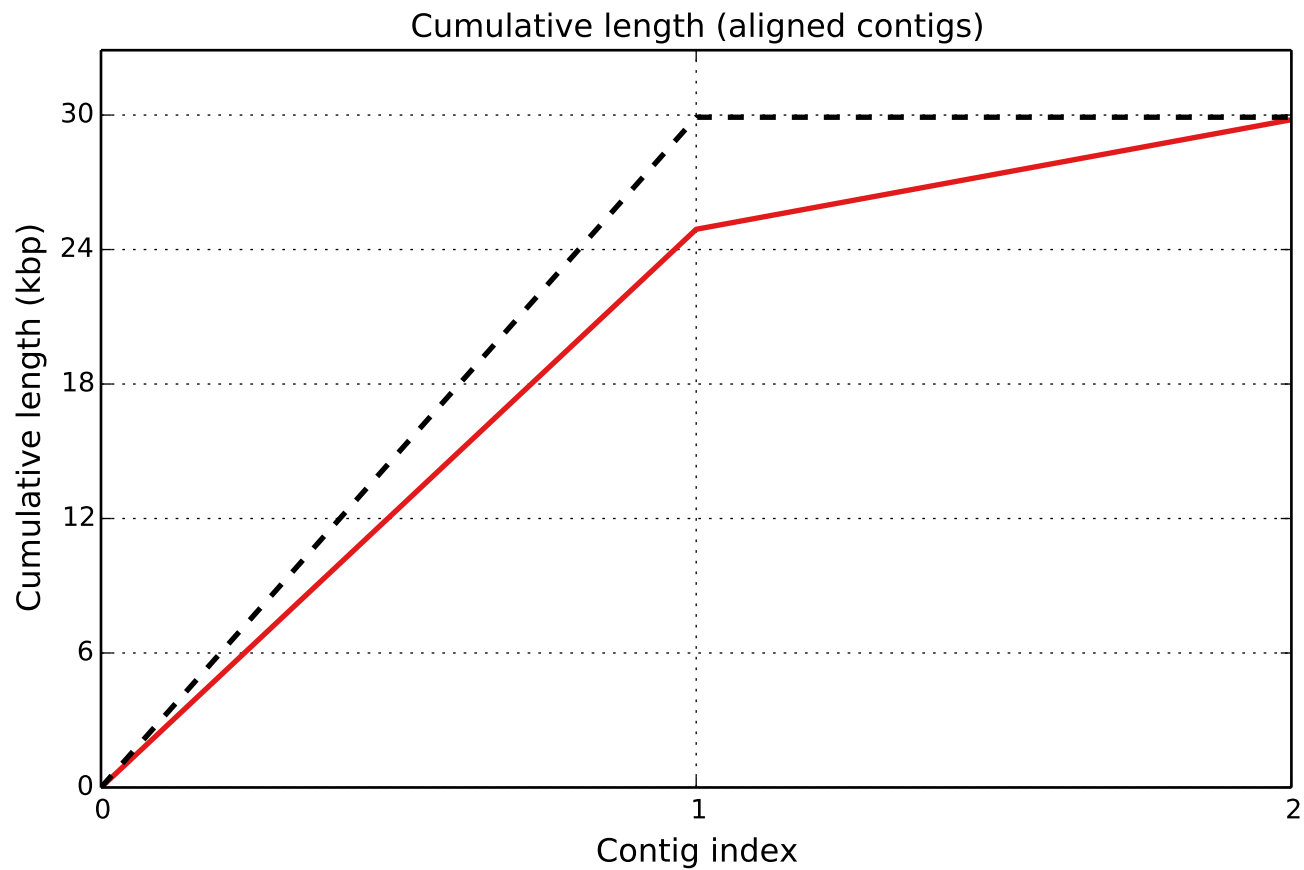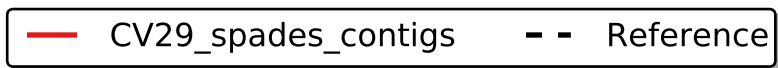

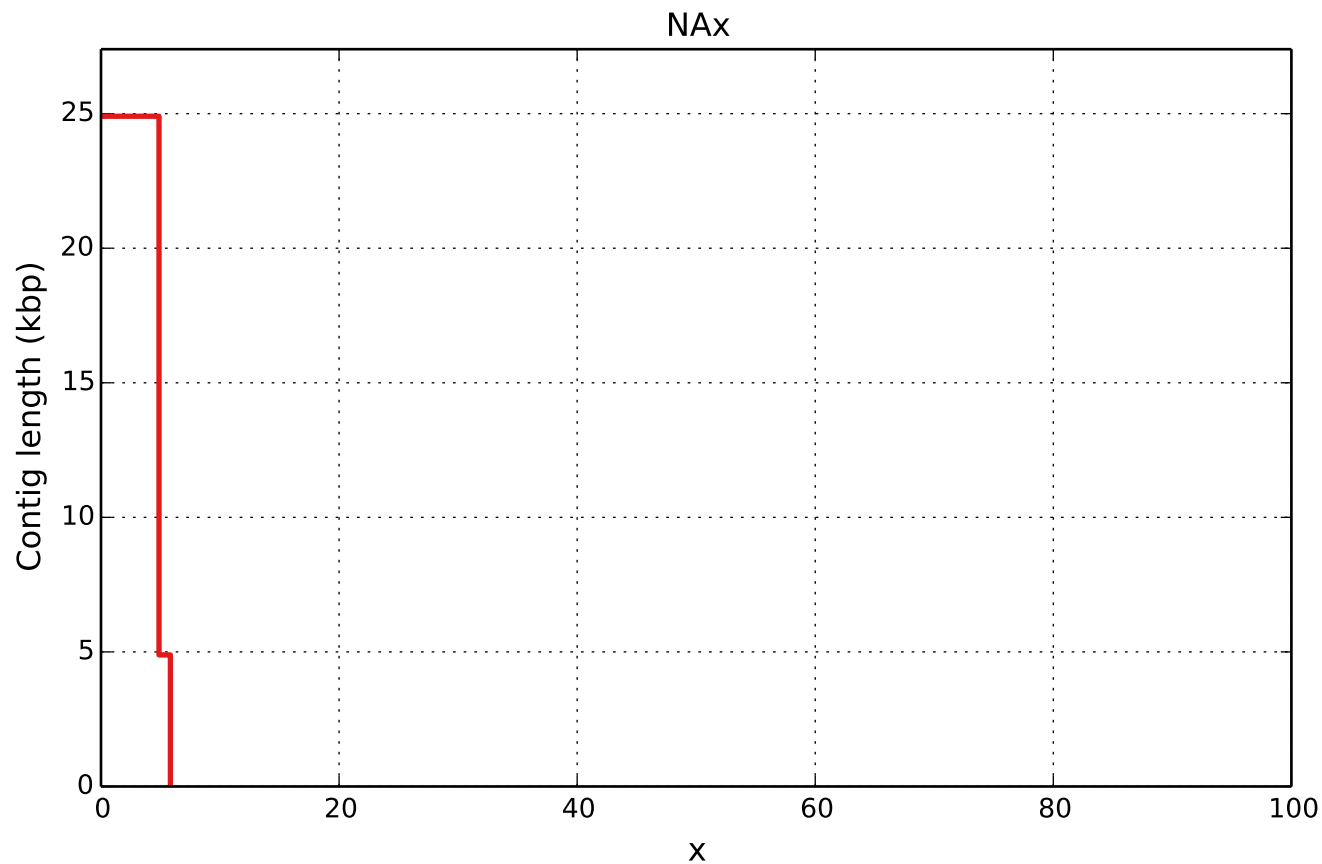

— CV29\_spades\_contigs

NGAx

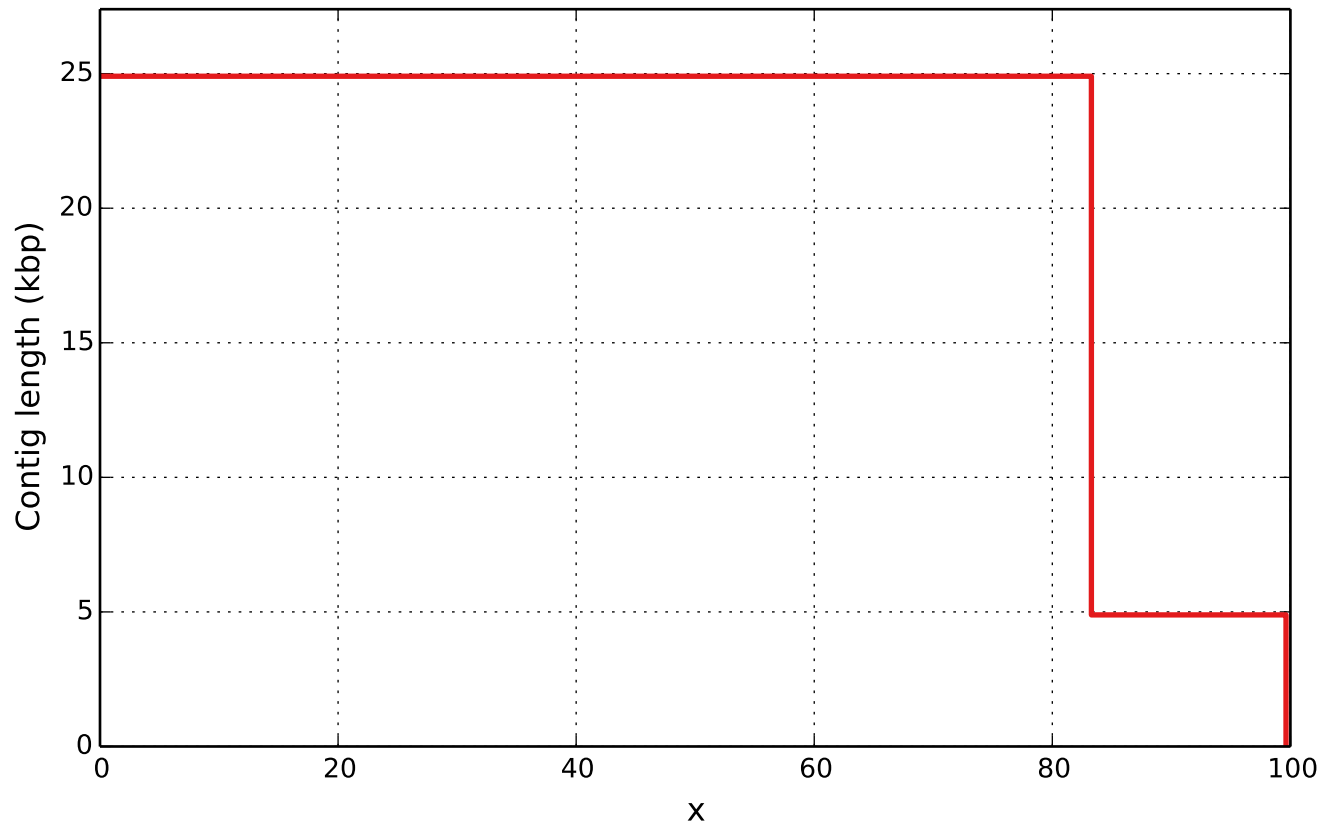

— CV29\_spades\_contigs

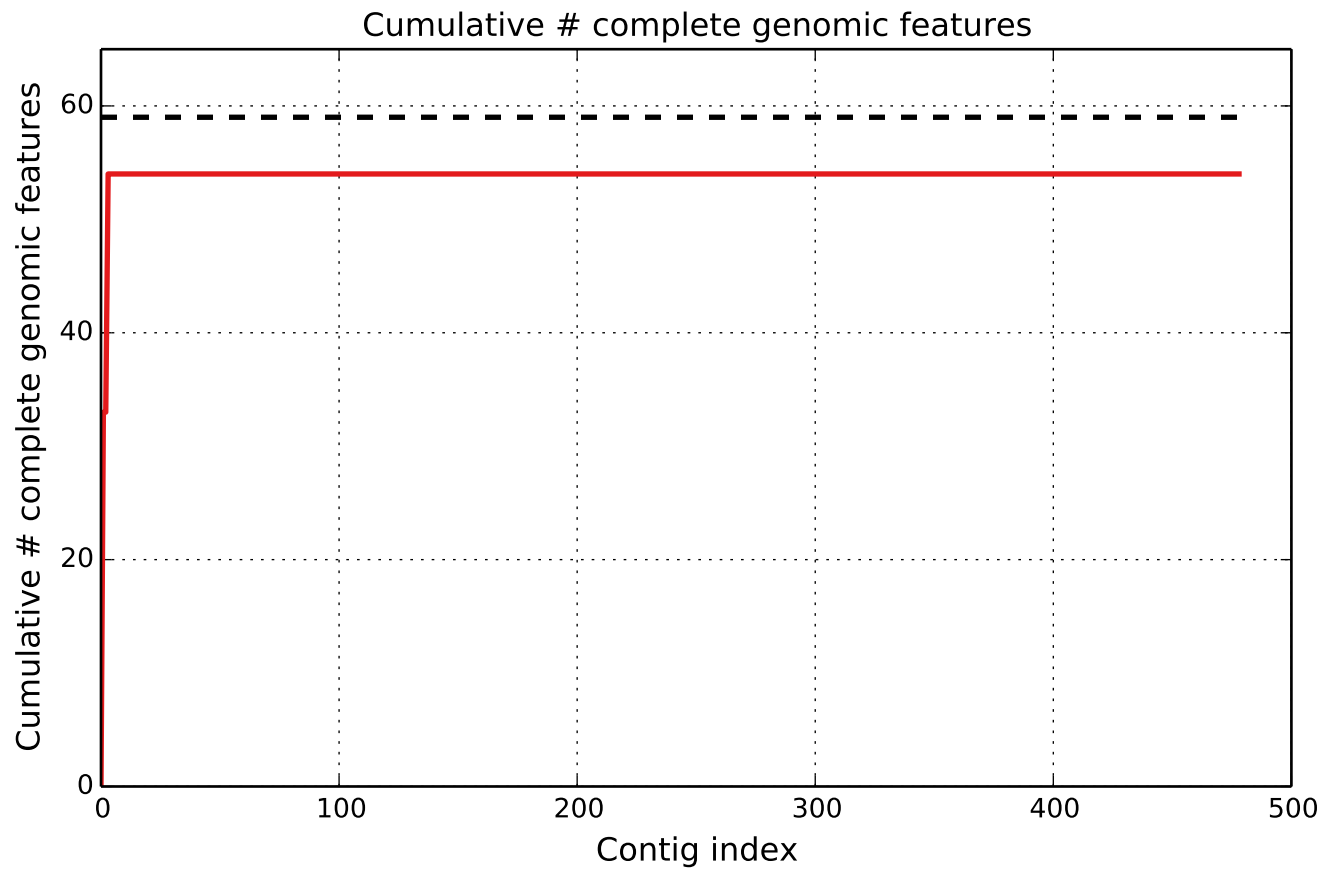

FRCurve (genomic features)

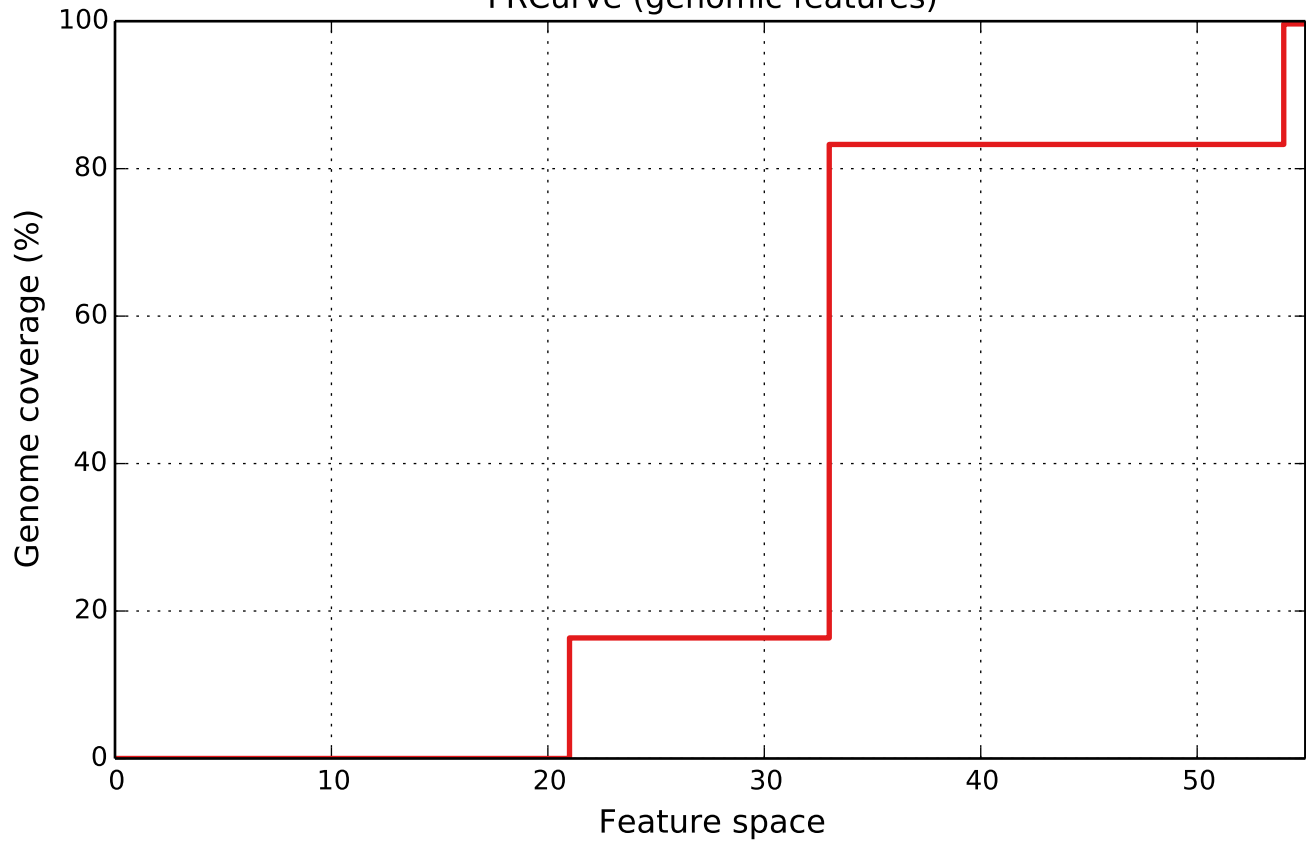

— CV29\_spades\_contigs
