# Supplementary material for: VGEA: an RNA viral assembly toolkit
Source: PeerJ journal article supplement (doi:10.7717/peerj.12129), 2021-09-06
Supplement: Supplementary_File_2.zip [file Supplementary_File_2.zip]

# Report

|                             | CV29_contigs |
|-----------------------------|--------------|
| # contigs (>= 0 bp)         | 31           |
| # contigs (>= 1000 bp)      | 24           |
| # contigs (>= 5000 bp)      | 3            |
| # contigs (>= 10000 bp)     | 0            |
| # contigs (>= 25000 bp)     | 0            |
| # contigs (>= 50000 bp)     | 0            |
| Total length (>= 0 bp)      | 66226        |
| Total length (>= 1000 bp)   | 60605        |
| Total length (>= 5000 bp)   | 22178        |
| Total length (>= 10000 bp)  | 0            |
| Total length (>= 25000 bp)  | 0            |
| Total length (>= 50000 bp)  | 0            |
| # contigs                   | 31           |
| Largest contig              | 7731         |
| Total length                | 66226        |
| Reference length            | 29903        |
| GC (%)                      | 45.10        |
| Reference GC (%)            | 37.97        |
| N50                         | 3065         |
| NG50                        | 7534         |
| N75                         | 1433         |
| NG75                        | 4428         |
| L50                         | 7            |
| LG50                        | 2            |
| L75                         | 15           |
| LG75                        | 4            |
| # misassemblies             | 0            |
| # misassembled contigs      | 0            |
| Misassembled contigs length | 0            |
| # local misassemblies       | 0            |
| # scaffold gap ext. mis.    | 0            |
| # scaffold gap loc. mis.    | 0            |
| # unaligned mis. contigs    | 0            |
| # unaligned contigs         | 25 + 0 part  |
| Unaligned length            | 33568        |
| Genome fraction (%)         | 99.786       |
| Duplication ratio           | 1.094        |
| # N's per 100 kbp           | 0.00         |
| # mismatches per 100 kbp    | 30.16        |
| # indels per 100 kbp        | 0.00         |
| # genomic features          | 49 + 10 part |
| Largest alignment           | 7598         |
| Total aligned length        | 32041        |
| NGA50                       | 7459         |
| NGA75                       | 4321         |
| LGA50                       | 2            |
| LGA75                       | 4            |

All statistics are based on contigs of size >= 500 bp, unless otherwise noted (e.g., "# contigs (>= 0 bp)" and "Total length (>= 0 bp)" include all contigs).

## Misassemblies report

|                             | CV29_contigs |
|-----------------------------|--------------|
| # misassemblies             | 0            |
| # contig misassemblies      | 0            |
| # c. relocations            | 0            |
| # c. translocations         | 0            |
| # c. inversions             | 0            |
| # scaffold misassemblies    | 0            |
| # s. relocations            | 0            |
| # s. translocations         | 0            |
| # s. inversions             | 0            |
| # misassembled contigs      | 0            |
| Misassembled contigs length | 0            |
| # local misassemblies       | 0            |
| # scaffold gap ext. mis.    | 0            |
| # scaffold gap loc. mis.    | 0            |
| # unaligned mis. contigs    | 0            |
| # mismatches                | 9            |
| # indels                    | 0            |
| # indels (<= 5 bp)          | 0            |
| # indels (> 5 bp)           | 0            |
| Indels length               | 0            |

All statistics are based on contigs of size  $\geq 500$  bp, unless otherwise noted (e.g., "# contigs ( $\geq 0$  bp)" and "Total length ( $\geq 0$  bp)" include all contigs).

## Unaligned report

|                               | CV29_contigs |
|-------------------------------|--------------|
| # fully unaligned contigs     | 25           |
| Fully unaligned length        | 33568        |
| # partially unaligned contigs | 0            |
| Partially unaligned length    | 0            |
| # N's                         | 0            |

All statistics are based on contigs of size  $\geq 500$  bp, unless otherwise noted (e.g., "# contigs ( $\geq 0$  bp)" and "Total length ( $\geq 0$  bp)" include all contigs).

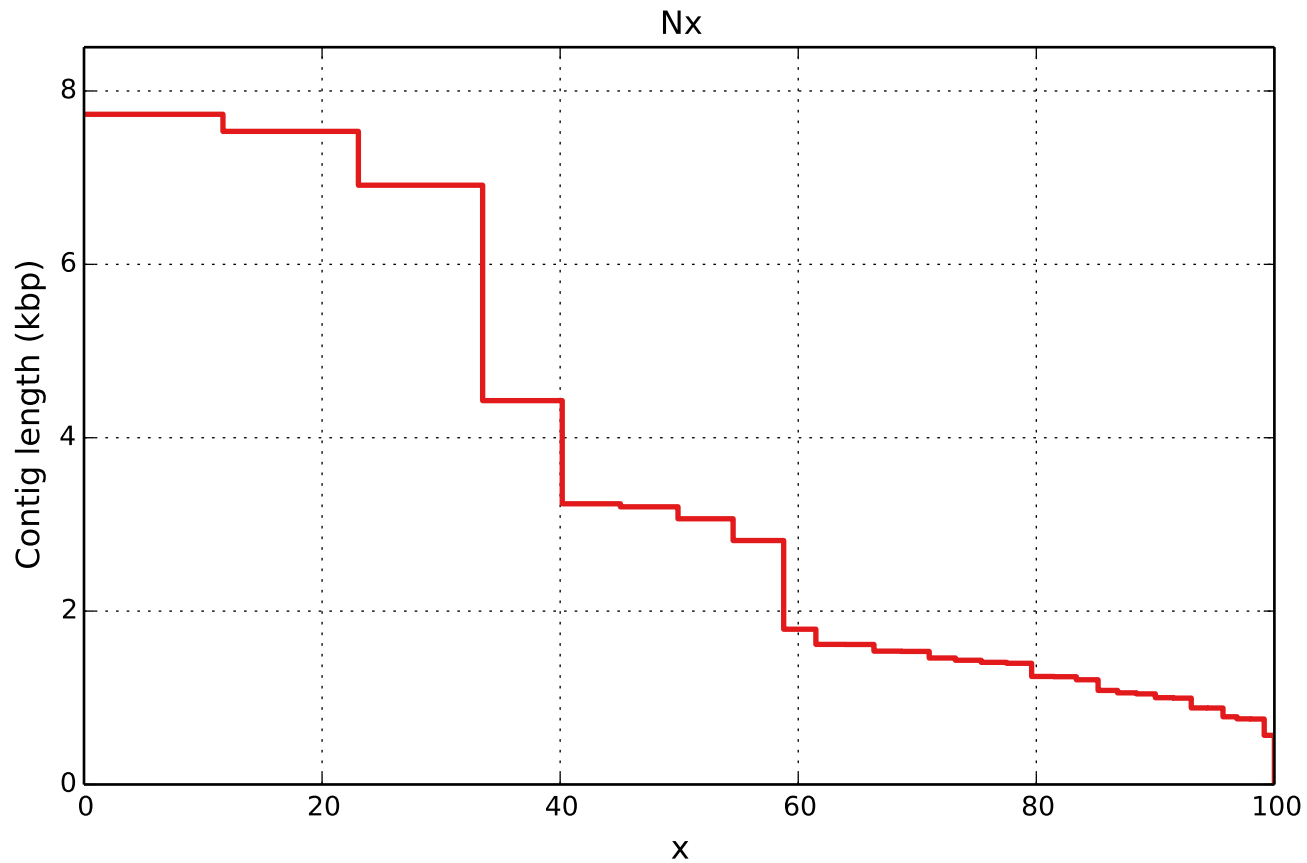

— CV29\_contigs

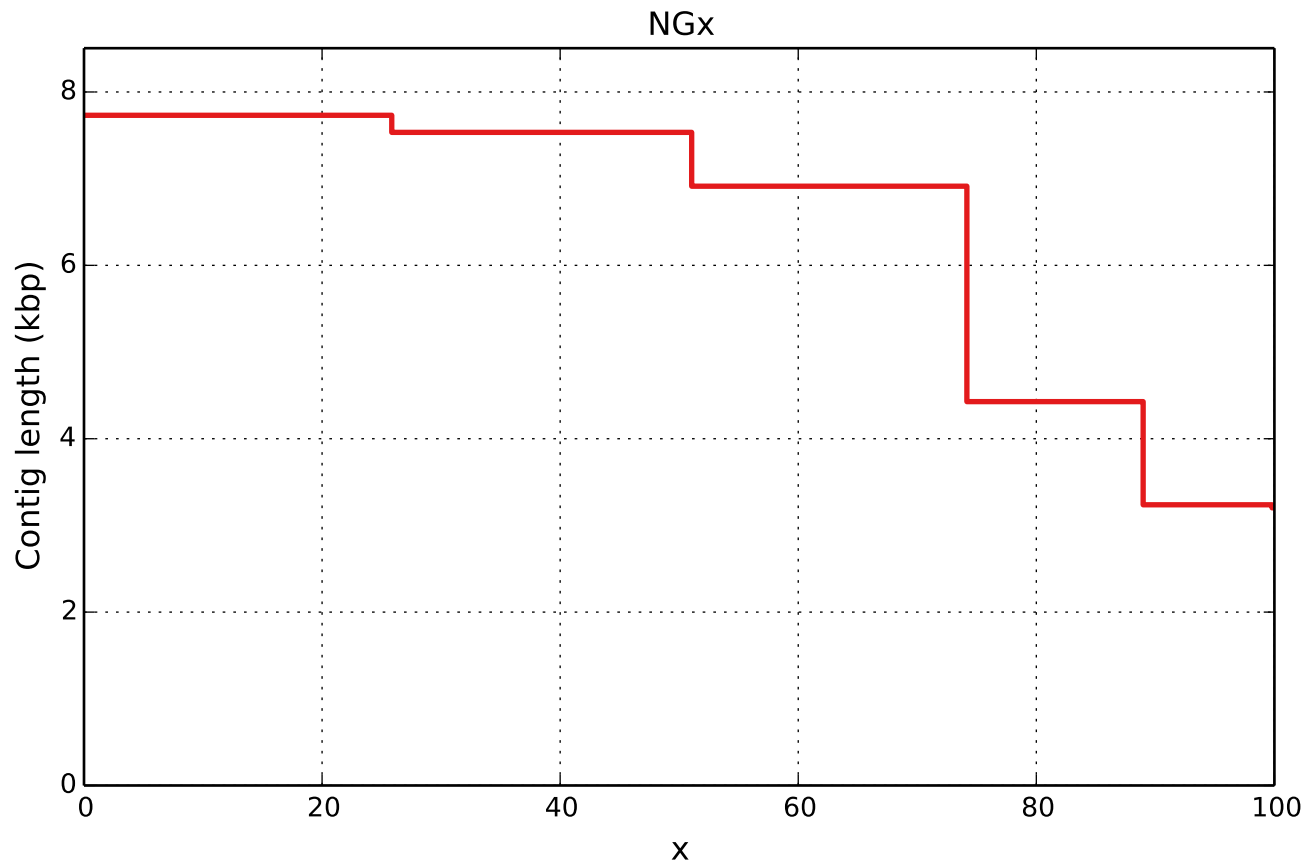

— CV29\_contigs

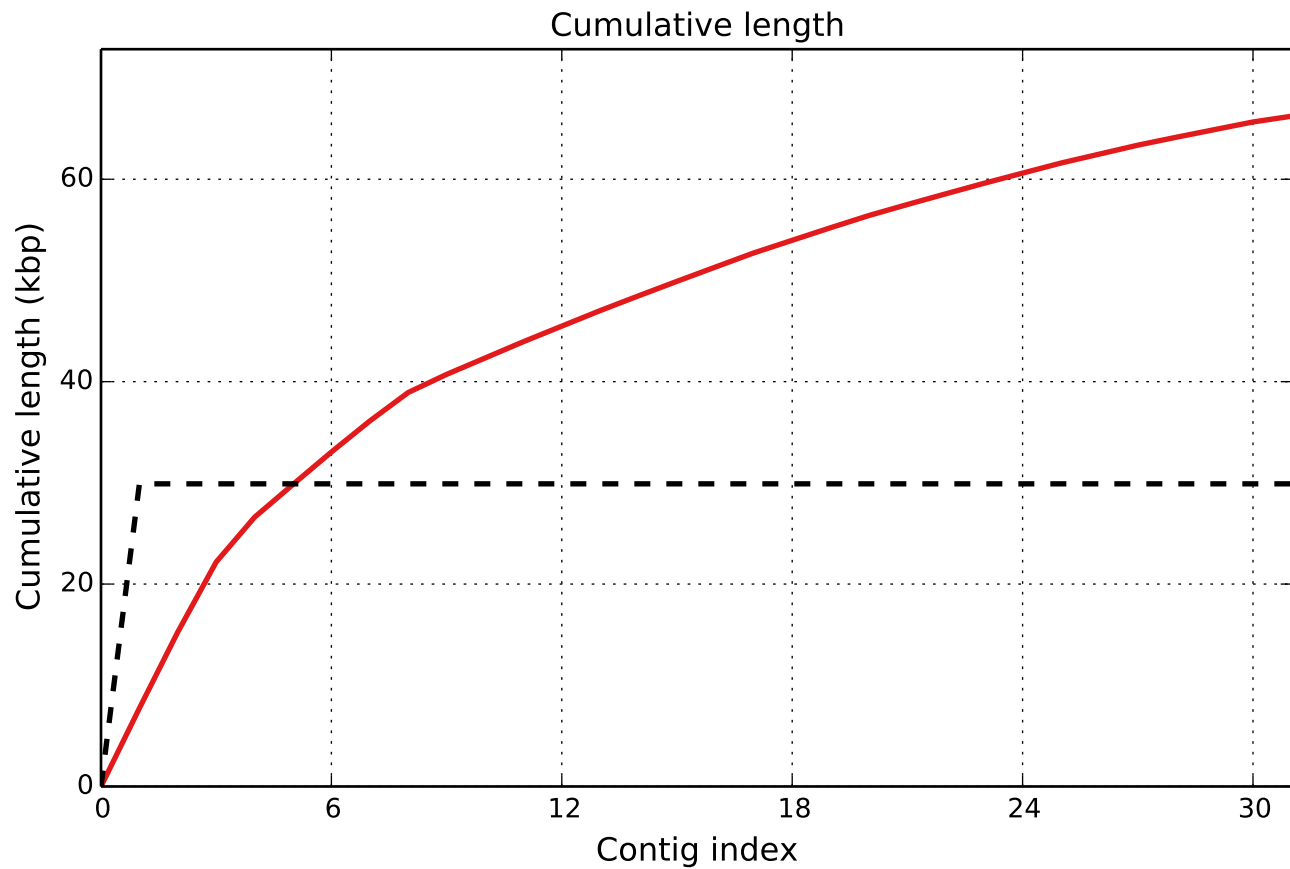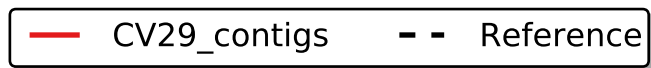

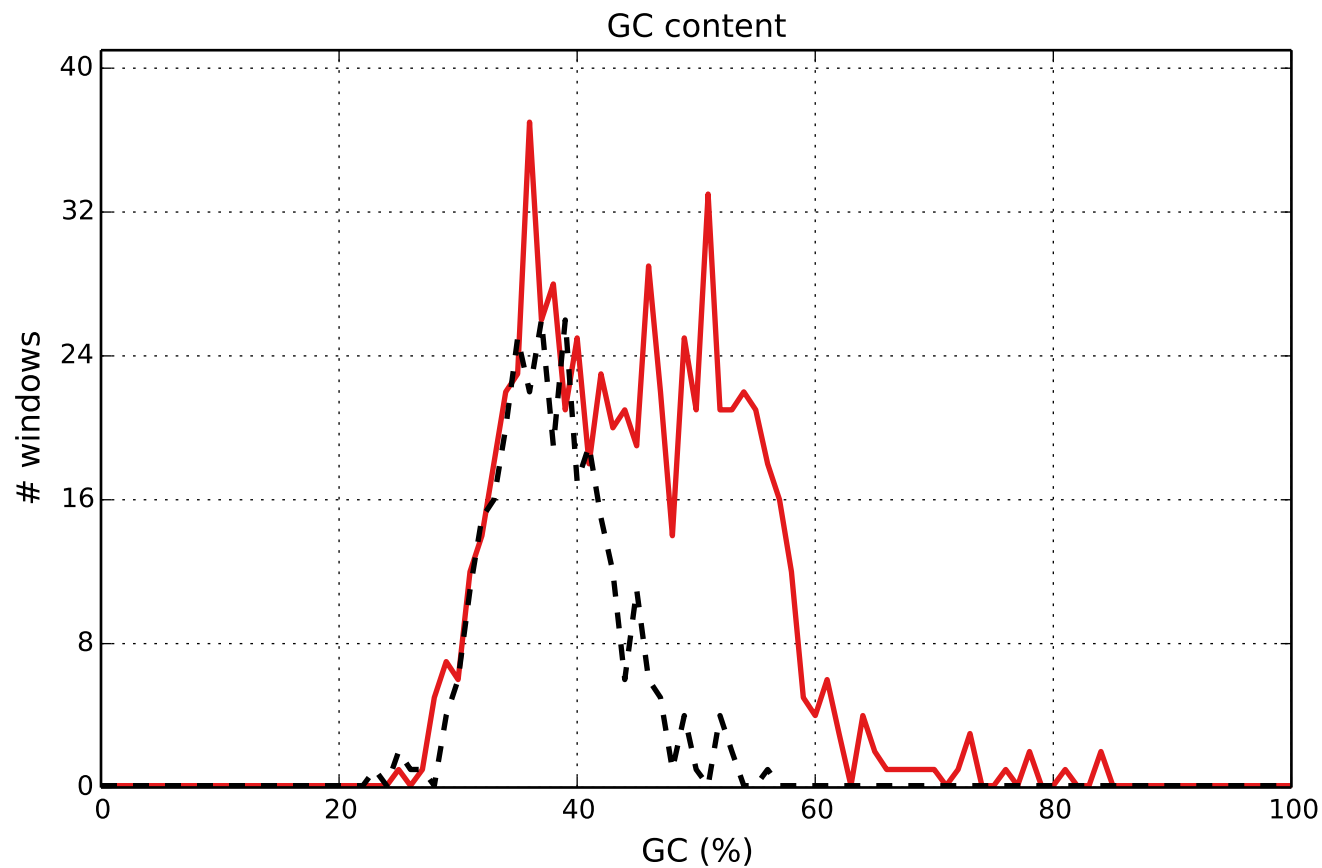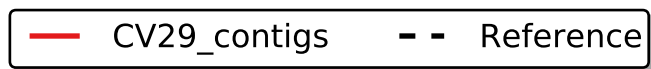

CV29\_contigs GC content

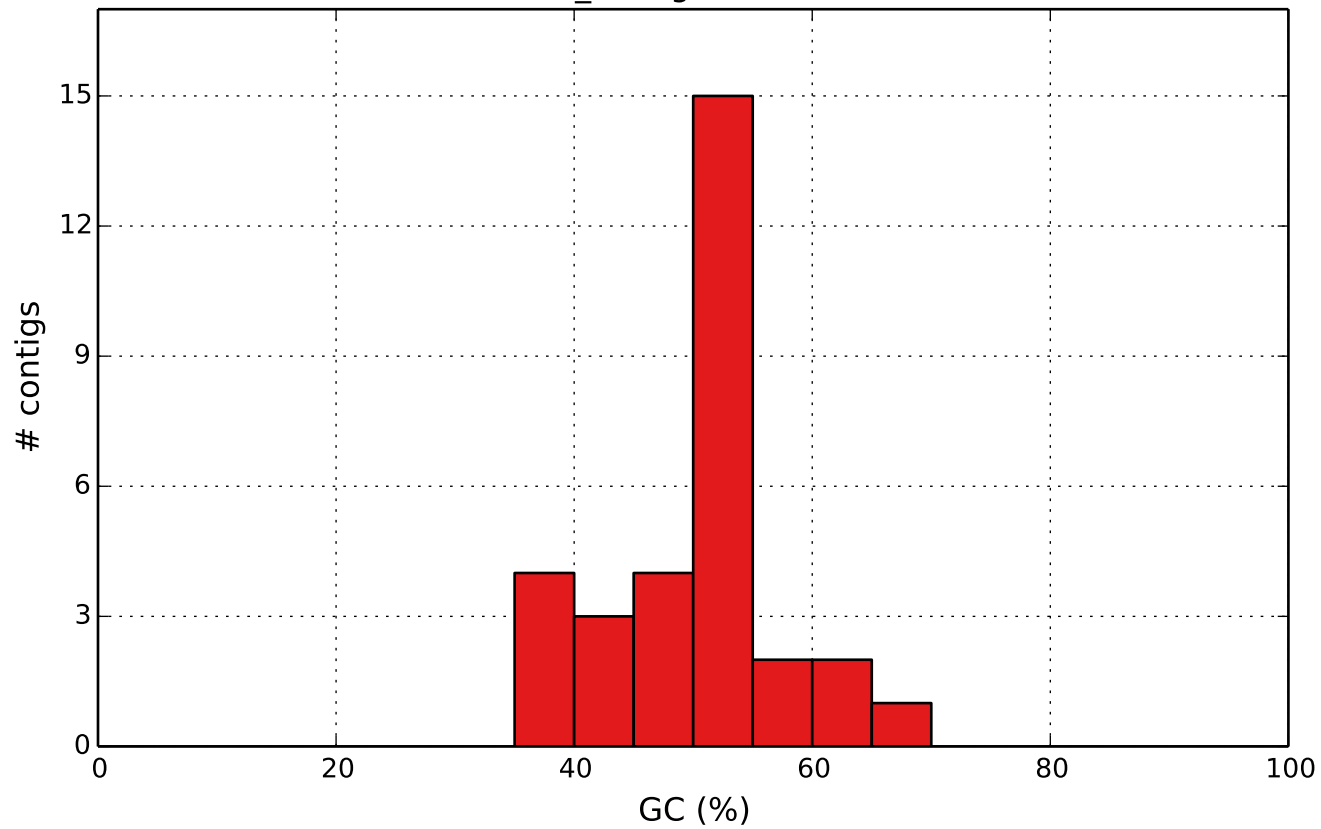

CV29\_contigs



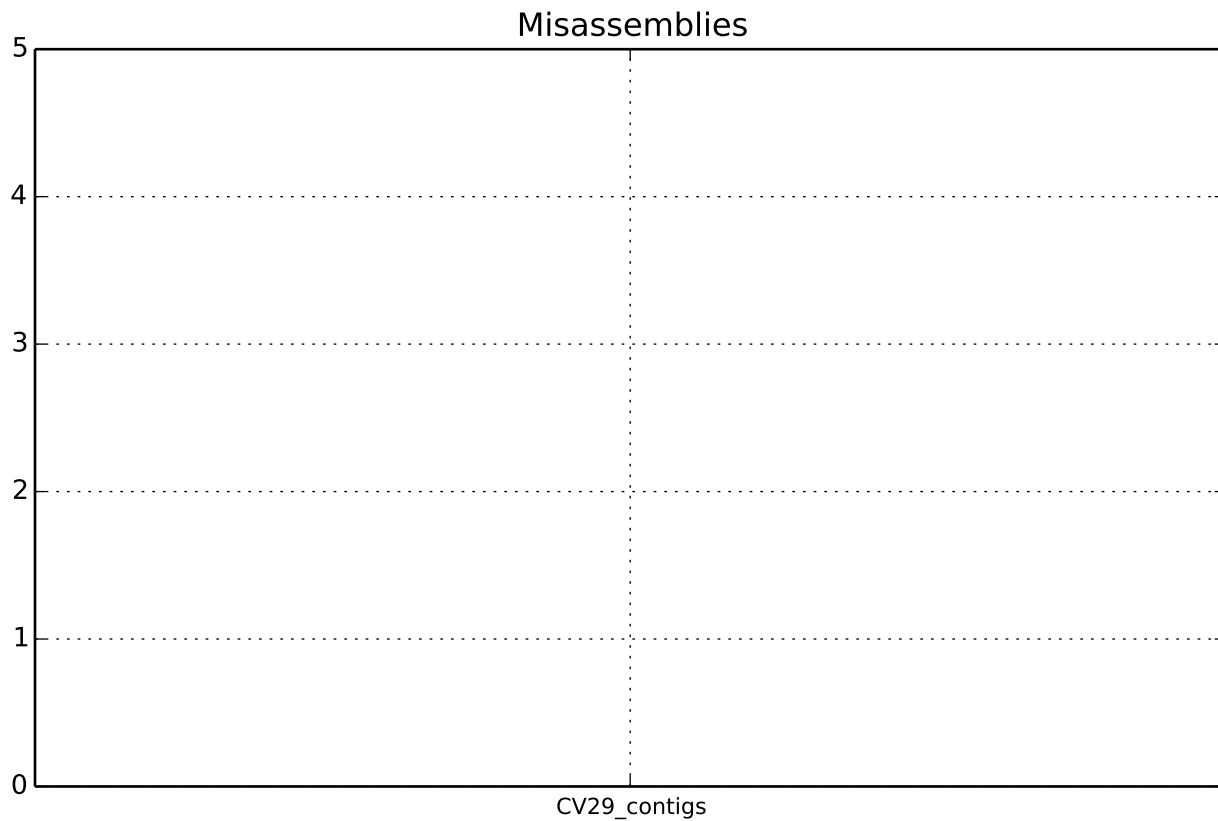

FRCurve (misassemblies)

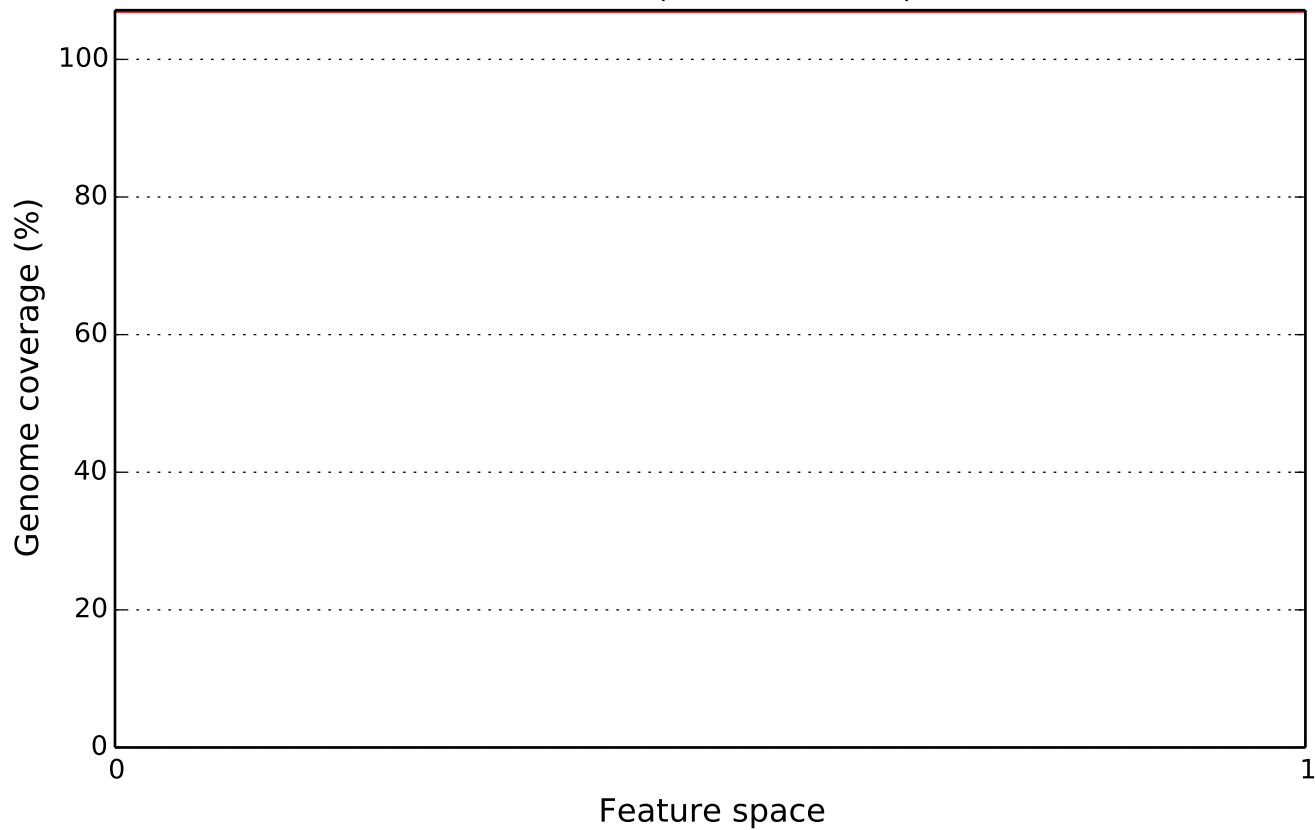

CV29\_contigs

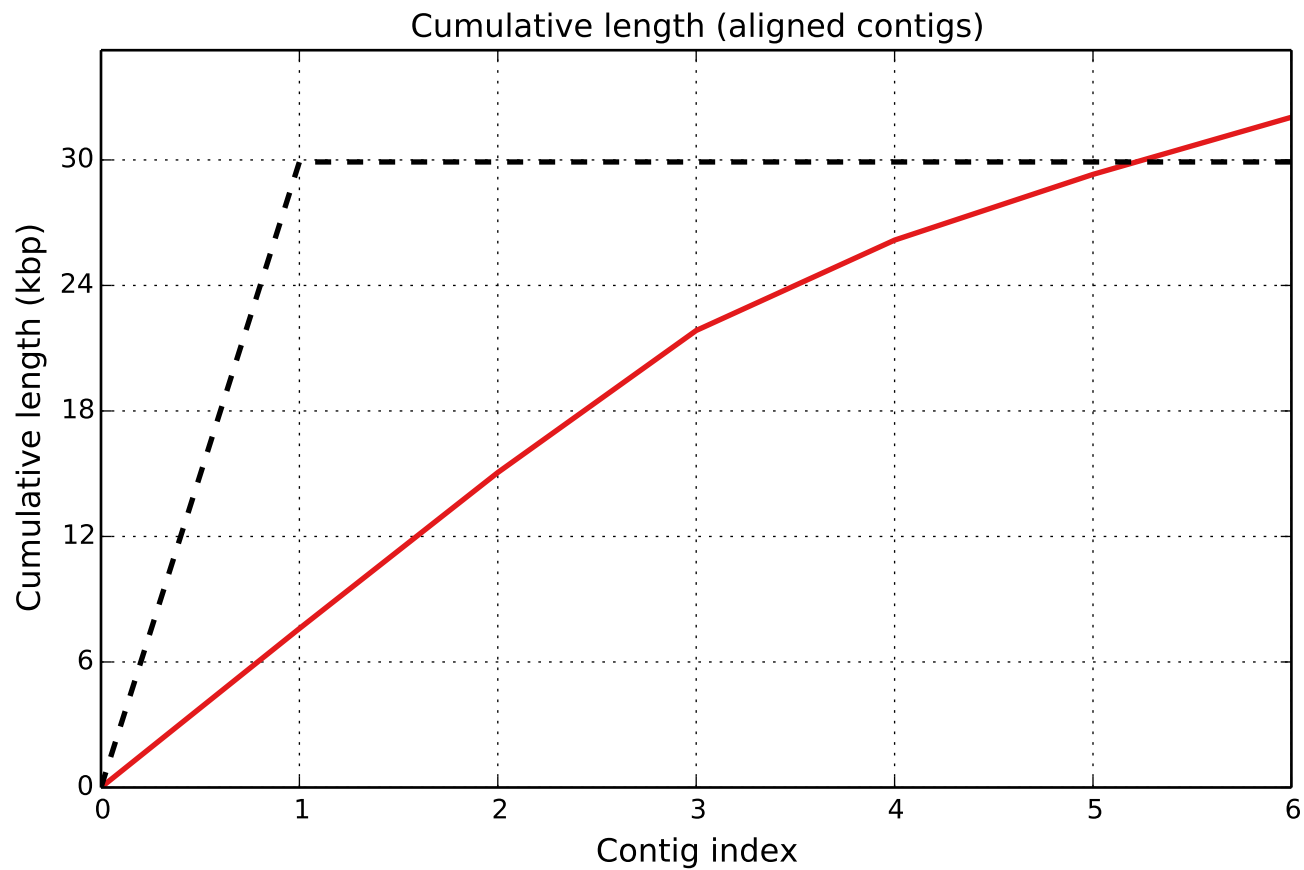

— CV29\_contigs    - - Reference

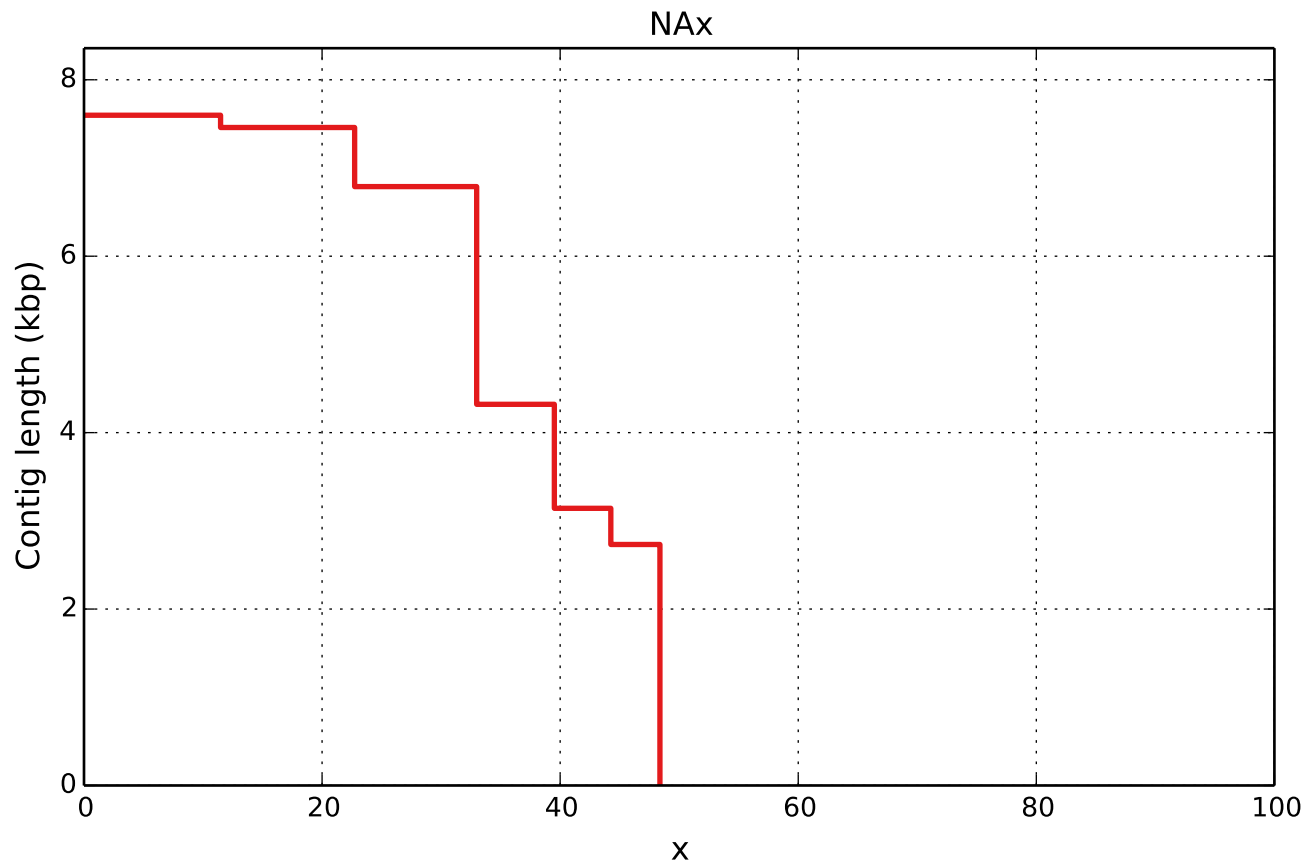

— CV29\_contigs

NGAx

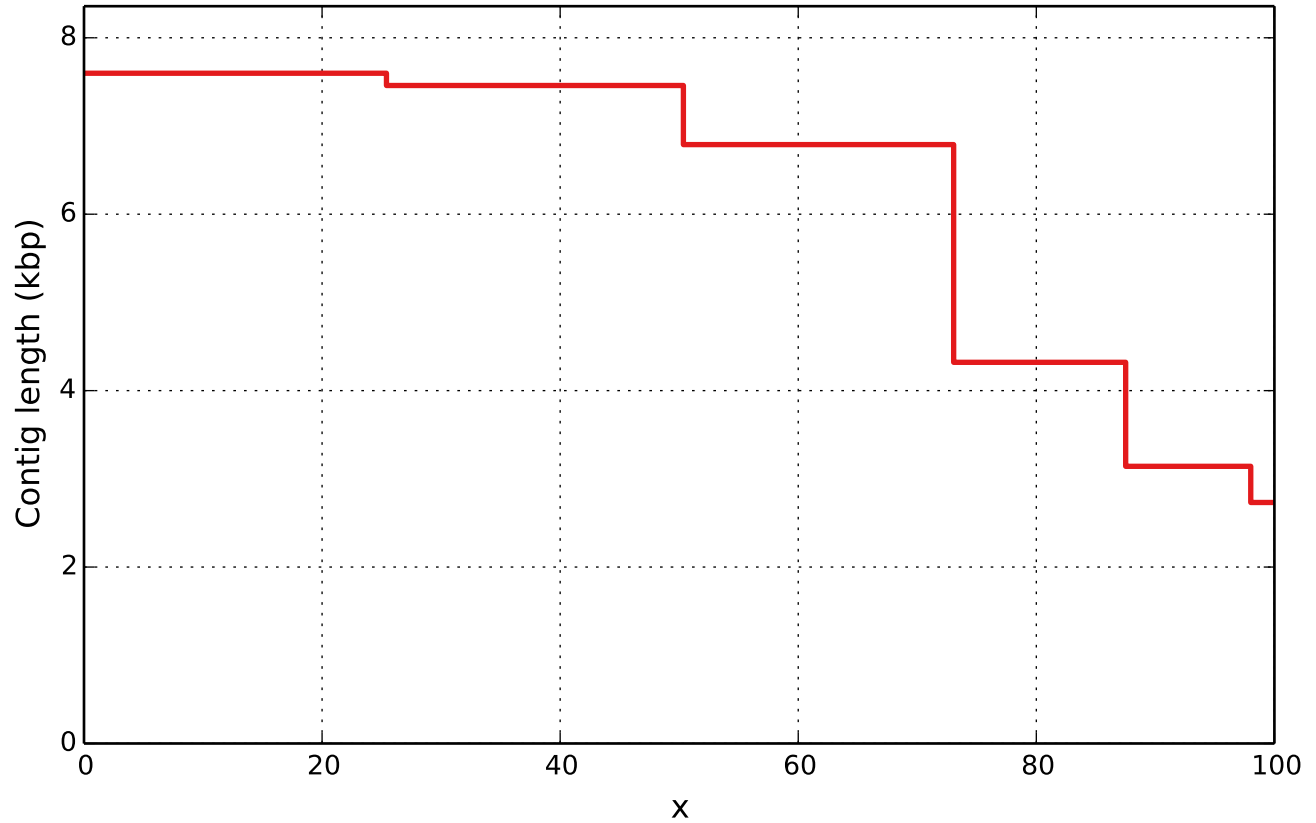

— CV29\_contigs

Cumulative # complete genomic features

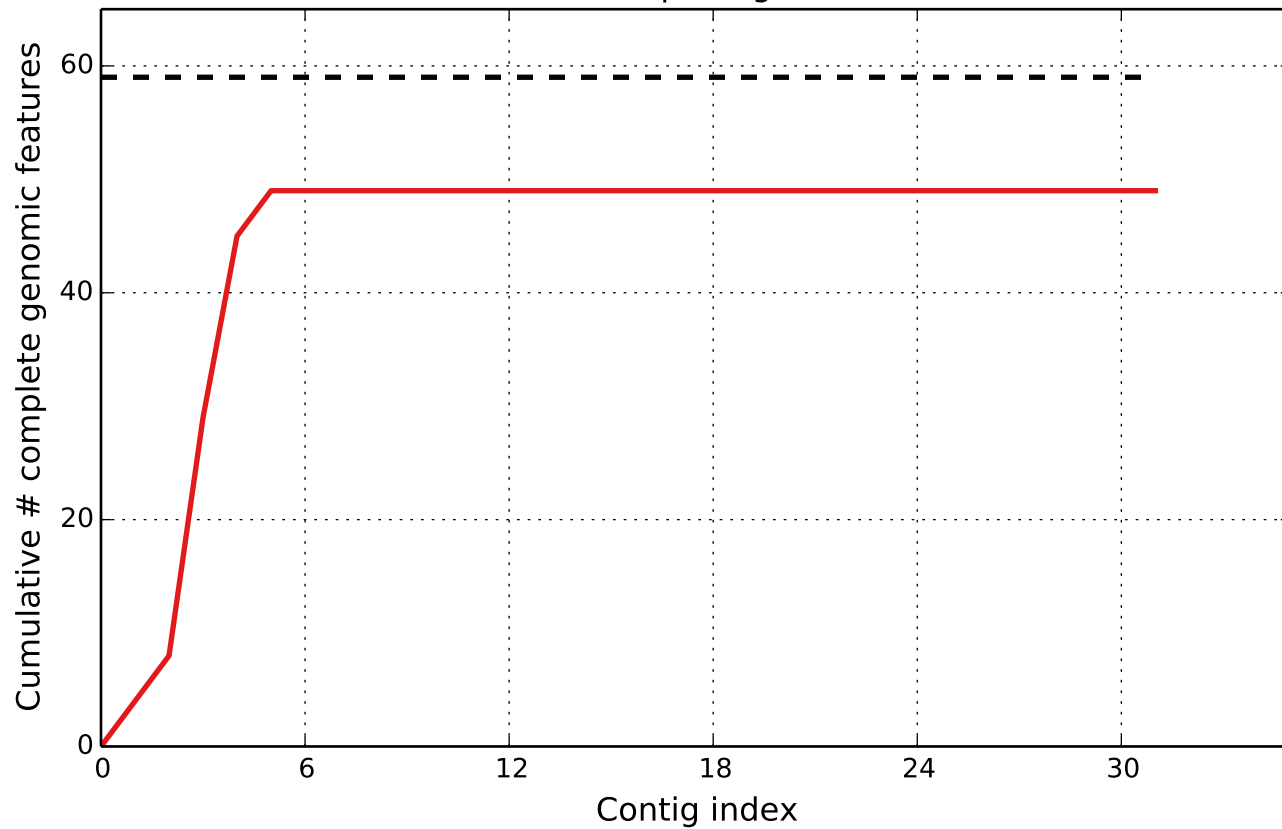

FRCurve (genomic features)

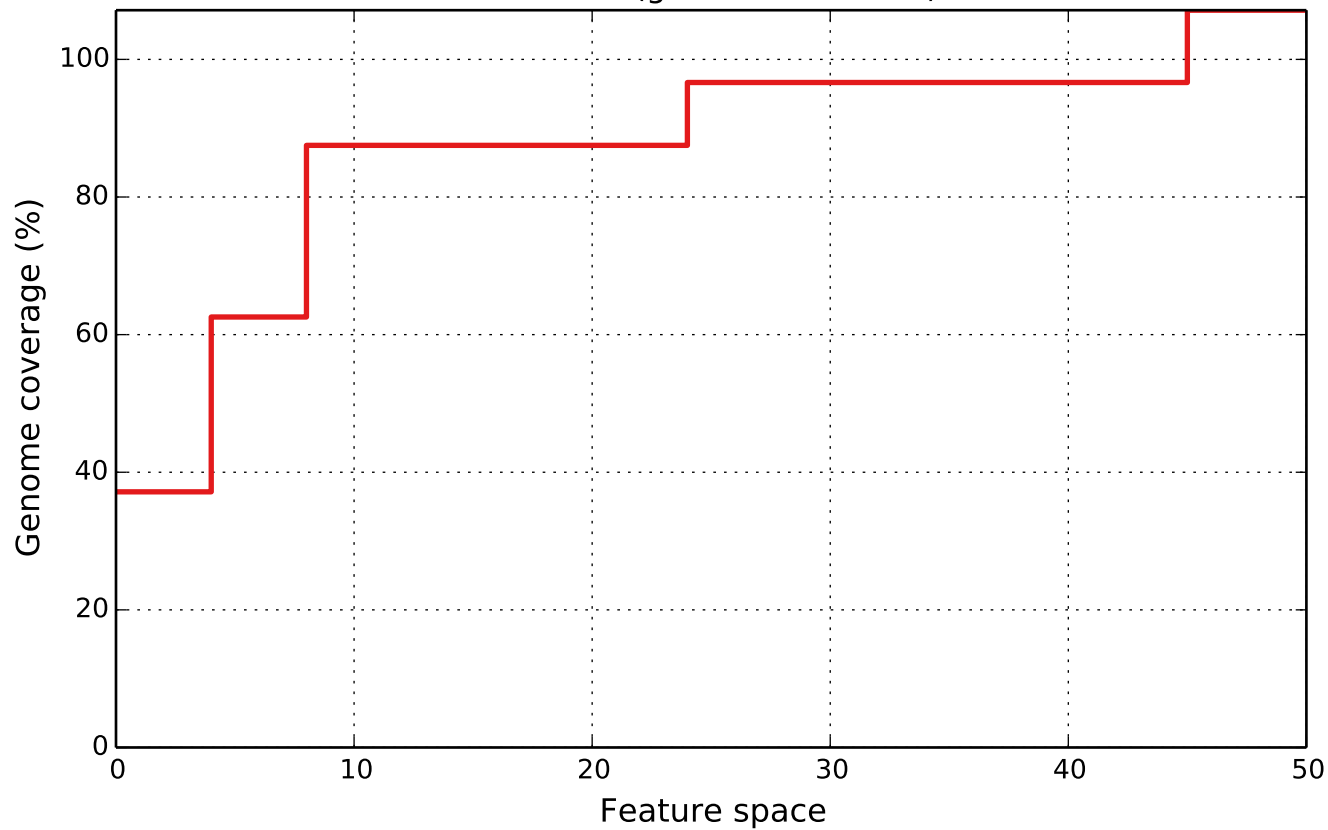

— CV29\_contigs
