# Supplementary material for: VGEA: an RNA viral assembly toolkit
Source: PeerJ journal article supplement (doi:10.7717/peerj.12129), 2021-09-06
Supplement: Supplementary_File_2.zip [file Supplementary_File_2.zip]

# Report

|                             | CV115_contigs |
|-----------------------------|---------------|
| # contigs (>= 0 bp)         | 28            |
| # contigs (>= 1000 bp)      | 15            |
| # contigs (>= 5000 bp)      | 1             |
| # contigs (>= 10000 bp)     | 0             |
| # contigs (>= 25000 bp)     | 0             |
| # contigs (>= 50000 bp)     | 0             |
| Total length (>= 0 bp)      | 44340         |
| Total length (>= 1000 bp)   | 33480         |
| Total length (>= 5000 bp)   | 5225          |
| Total length (>= 10000 bp)  | 0             |
| Total length (>= 25000 bp)  | 0             |
| Total length (>= 50000 bp)  | 0             |
| # contigs                   | 28            |
| Largest contig              | 5225          |
| Total length                | 44340         |
| Reference length            | 29903         |
| GC (%)                      | 43.55         |
| Reference GC (%)            | 37.97         |
| N50                         | 2258          |
| NG50                        | 3060          |
| N75                         | 1013          |
| NG75                        | 2258          |
| L50                         | 7             |
| LG50                        | 4             |
| L75                         | 15            |
| LG75                        | 7             |
| # misassemblies             | 0             |
| # misassembled contigs      | 0             |
| Misassembled contigs length | 0             |
| # local misassemblies       | 0             |
| # scaffold gap ext. mis.    | 0             |
| # scaffold gap loc. mis.    | 0             |
| # unaligned mis. contigs    | 0             |
| # unaligned contigs         | 16 + 0 part   |
| Unaligned length            | 14595         |
| Genome fraction (%)         | 96.957        |
| Duplication ratio           | 1.026         |
| # N's per 100 kbp           | 0.00          |
| # mismatches per 100 kbp    | 41.39         |
| # indels per 100 kbp        | 0.00          |
| # genomic features          | 38 + 21 part  |
| Largest alignment           | 5152          |
| Total aligned length        | 29438         |
| NA50                        | 2179          |
| NGA50                       | 3060          |
| NGA75                       | 2179          |
| LA50                        | 7             |
| LGA50                       | 4             |
| LGA75                       | 7             |

All statistics are based on contigs of size >= 500 bp, unless otherwise noted (e.g., "# contigs (>= 0 bp)" and "Total length (>= 0 bp)" include all contigs).

## Misassemblies report

|                             | CV115_contigs |
|-----------------------------|---------------|
| # misassemblies             | 0             |
| # contig misassemblies      | 0             |
| # c. relocations            | 0             |
| # c. translocations         | 0             |
| # c. inversions             | 0             |
| # scaffold misassemblies    | 0             |
| # s. relocations            | 0             |
| # s. translocations         | 0             |
| # s. inversions             | 0             |
| # misassembled contigs      | 0             |
| Misassembled contigs length | 0             |
| # local misassemblies       | 0             |
| # scaffold gap ext. mis.    | 0             |
| # scaffold gap loc. mis.    | 0             |
| # unaligned mis. contigs    | 0             |
| # mismatches                | 12            |
| # indels                    | 0             |
| # indels (<= 5 bp)          | 0             |
| # indels (> 5 bp)           | 0             |
| Indels length               | 0             |

All statistics are based on contigs of size  $\geq 500$  bp, unless otherwise noted (e.g., "# contigs ( $\geq 0$  bp)" and "Total length ( $\geq 0$  bp)" include all contigs).

## Unaligned report

|                               | CV115_contigs |
|-------------------------------|---------------|
| # fully unaligned contigs     | 16            |
| Fully unaligned length        | 14595         |
| # partially unaligned contigs | 0             |
| Partially unaligned length    | 0             |
| # N's                         | 0             |

All statistics are based on contigs of size  $\geq 500$  bp, unless otherwise noted (e.g., "# contigs ( $\geq 0$  bp)" and "Total length ( $\geq 0$  bp)" include all contigs).

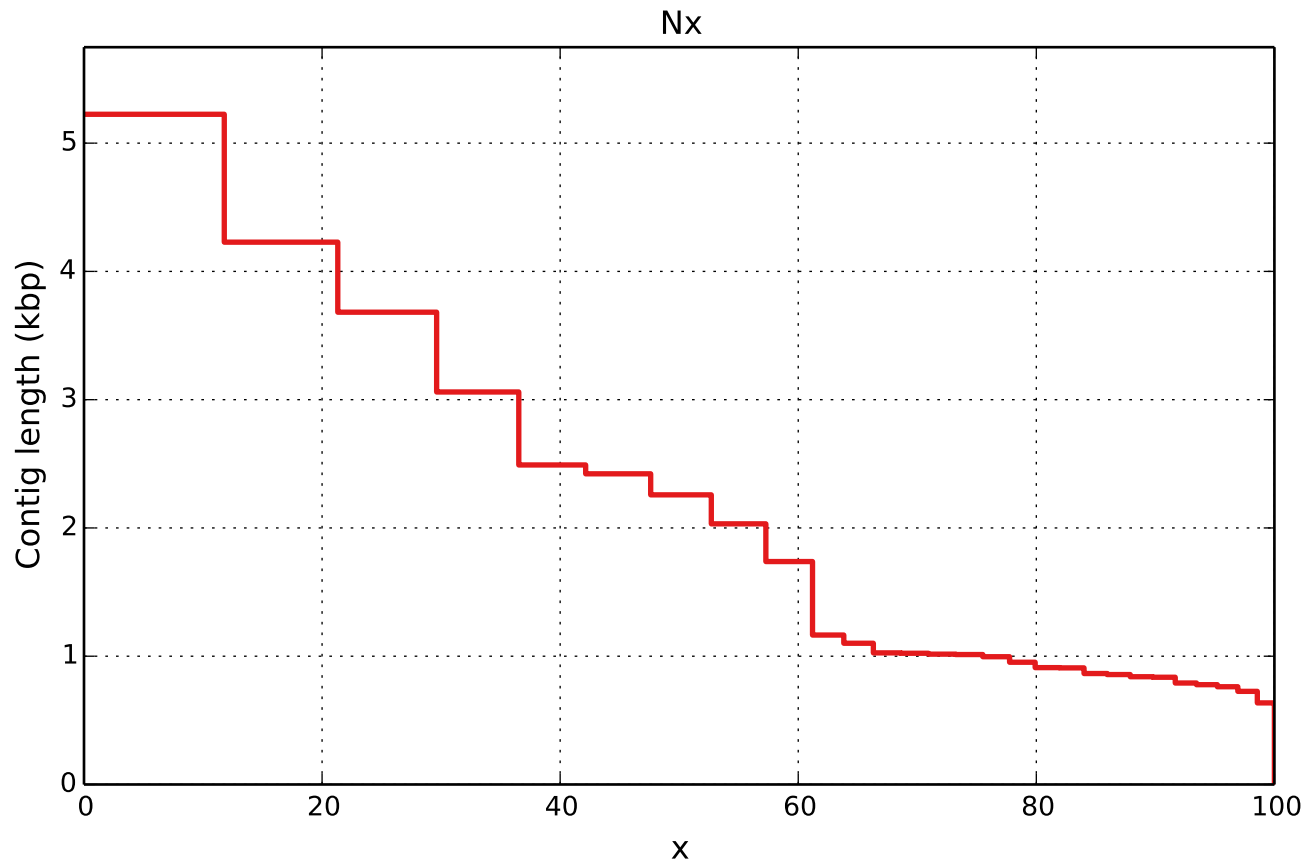

— CV115\_contigs

NGx

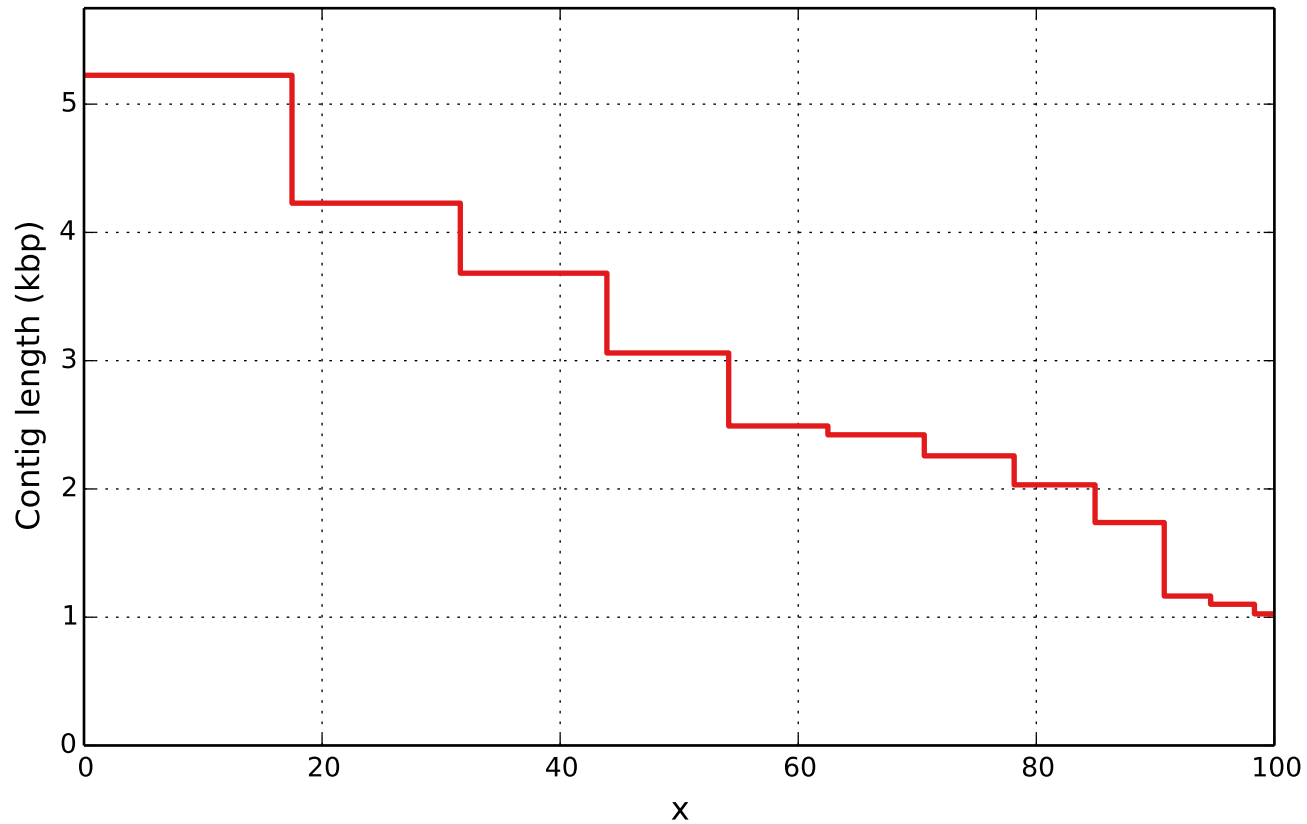

— CV115\_contigs

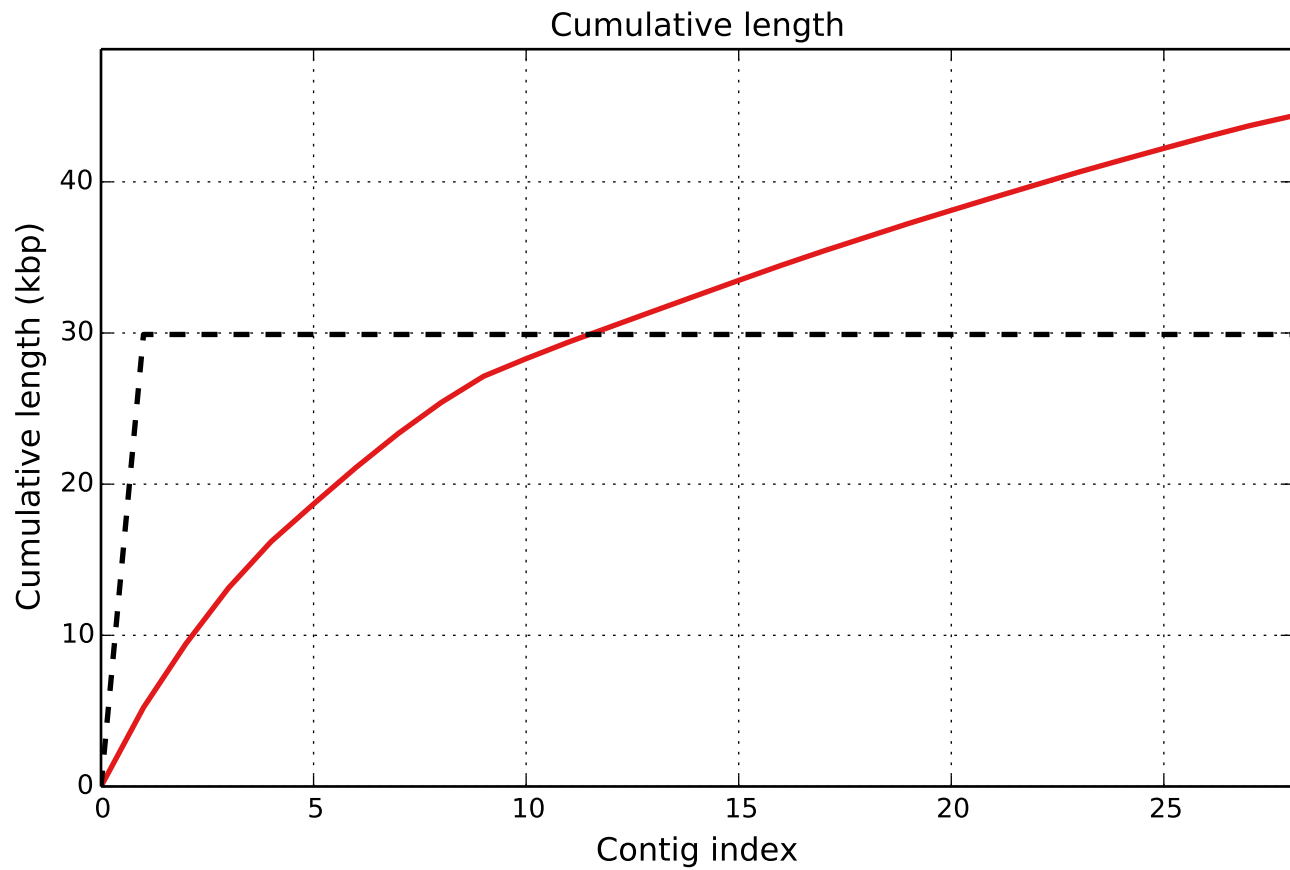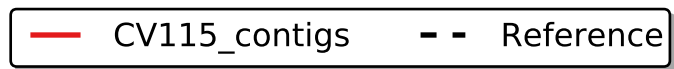

GC content

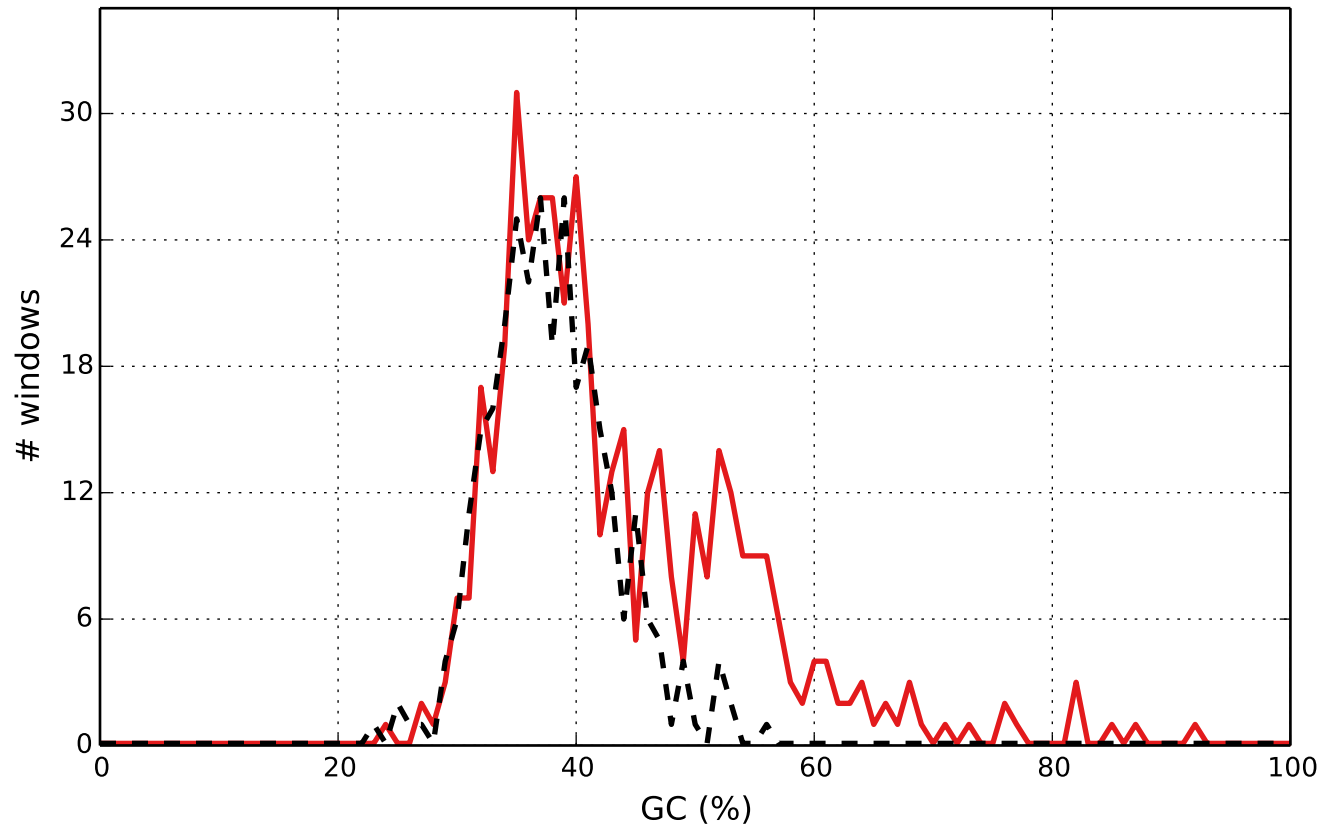

— CV115\_contigs    - - Reference

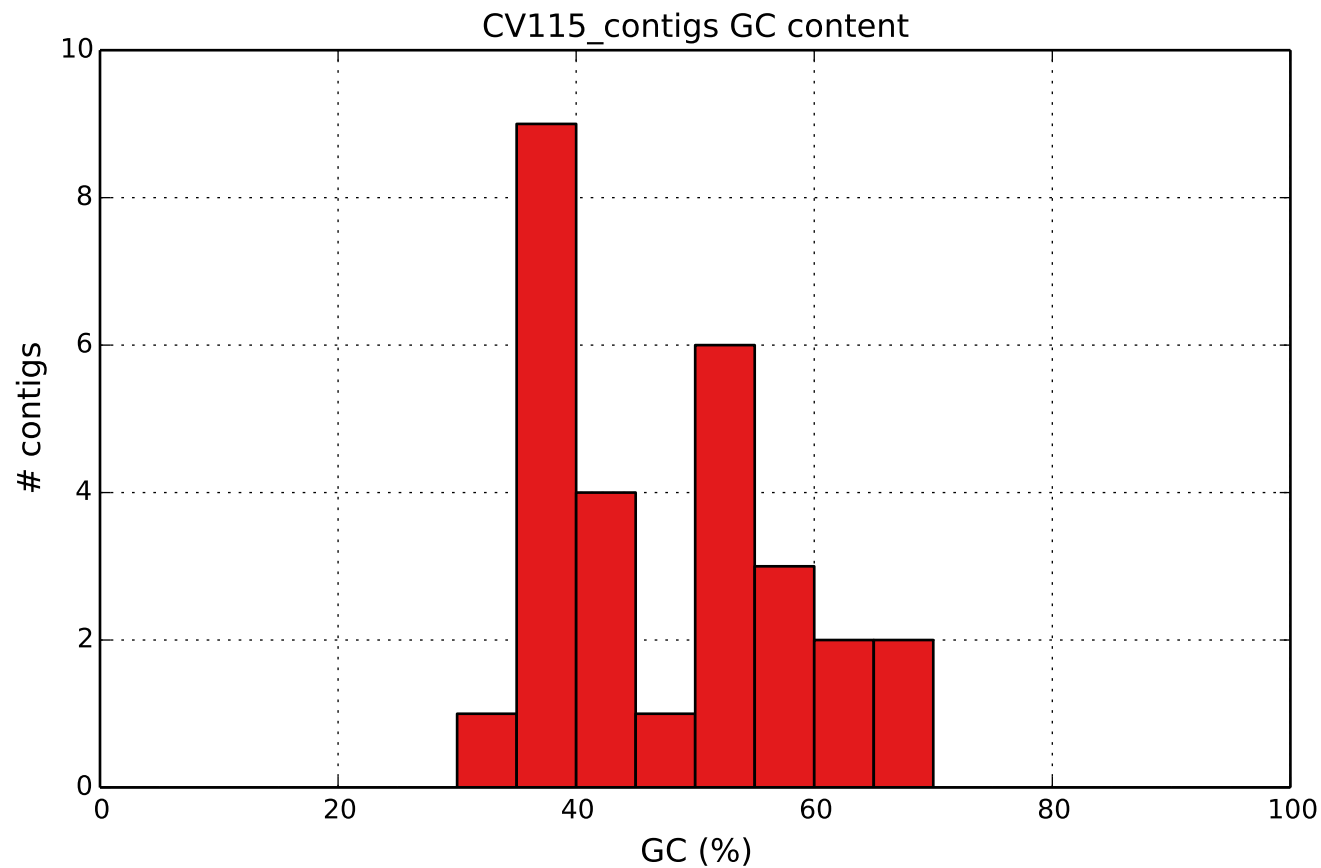

CV115\_contigs



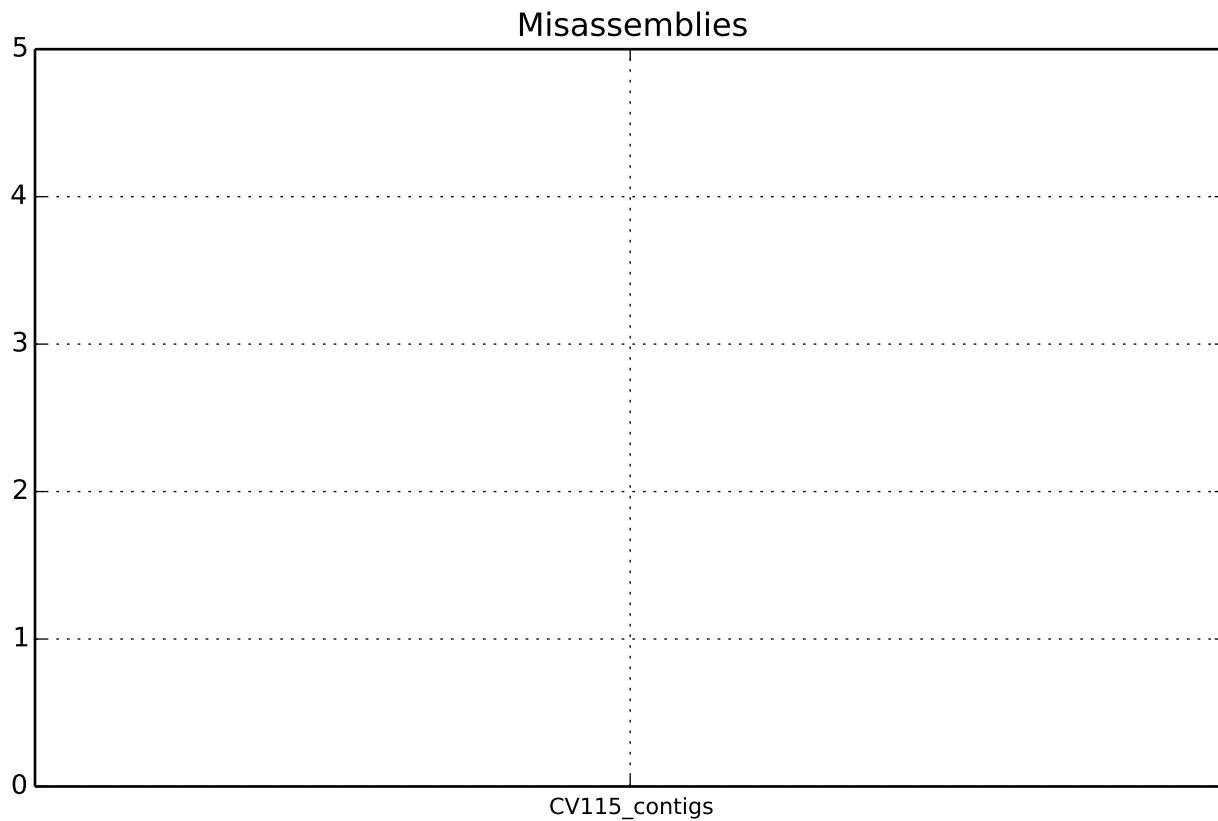

FRCurve (misassemblies)

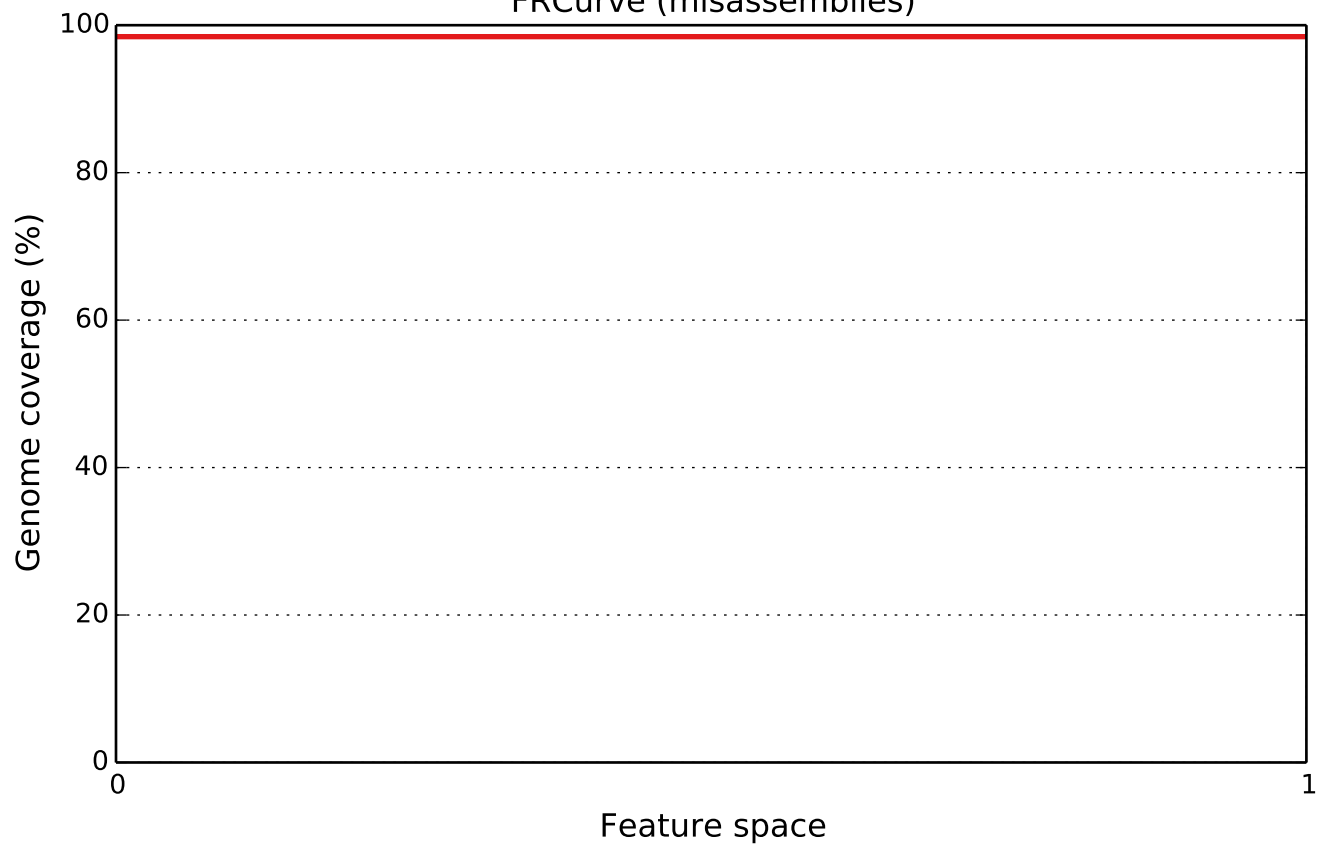

— CV115\_contigs

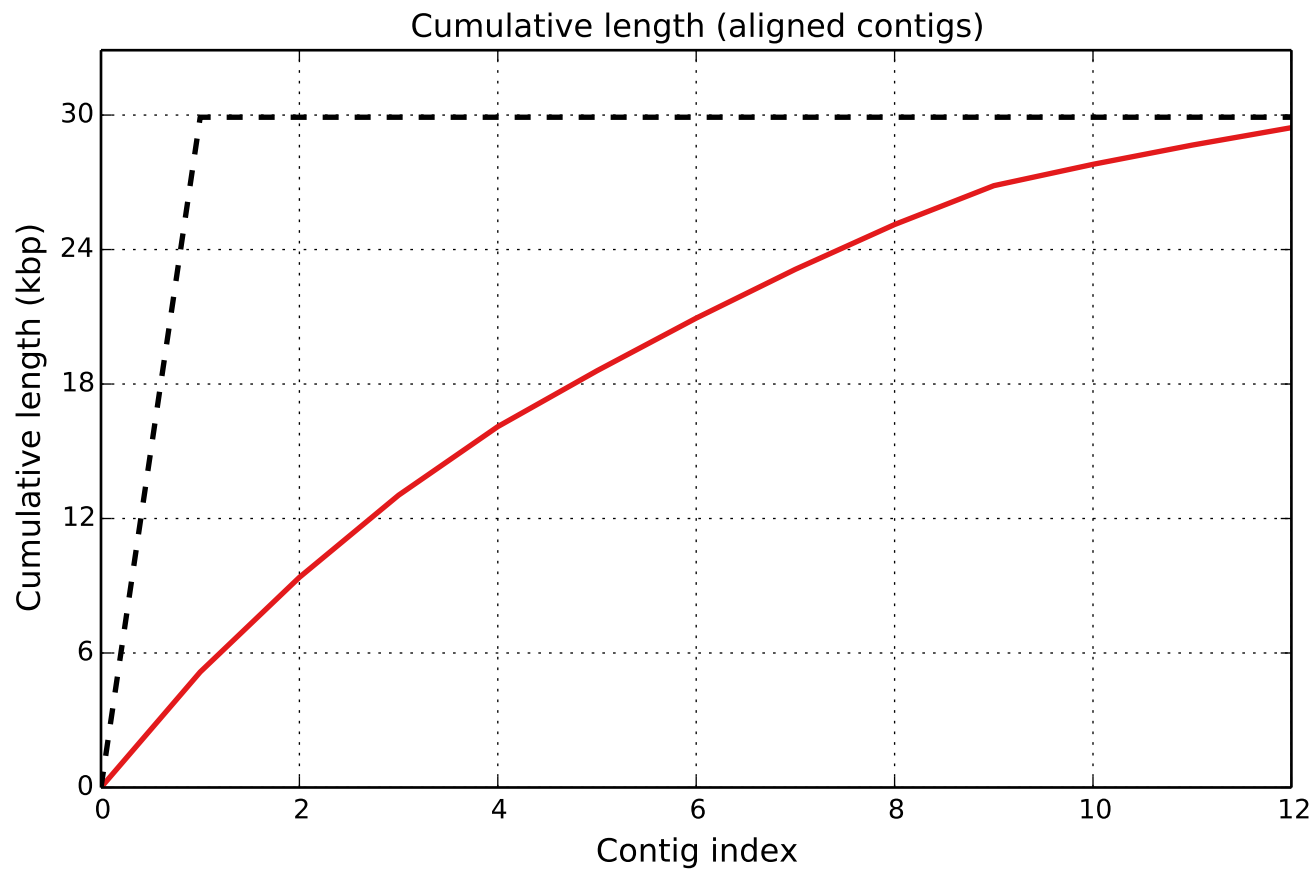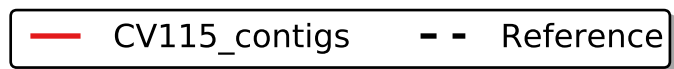

NAx

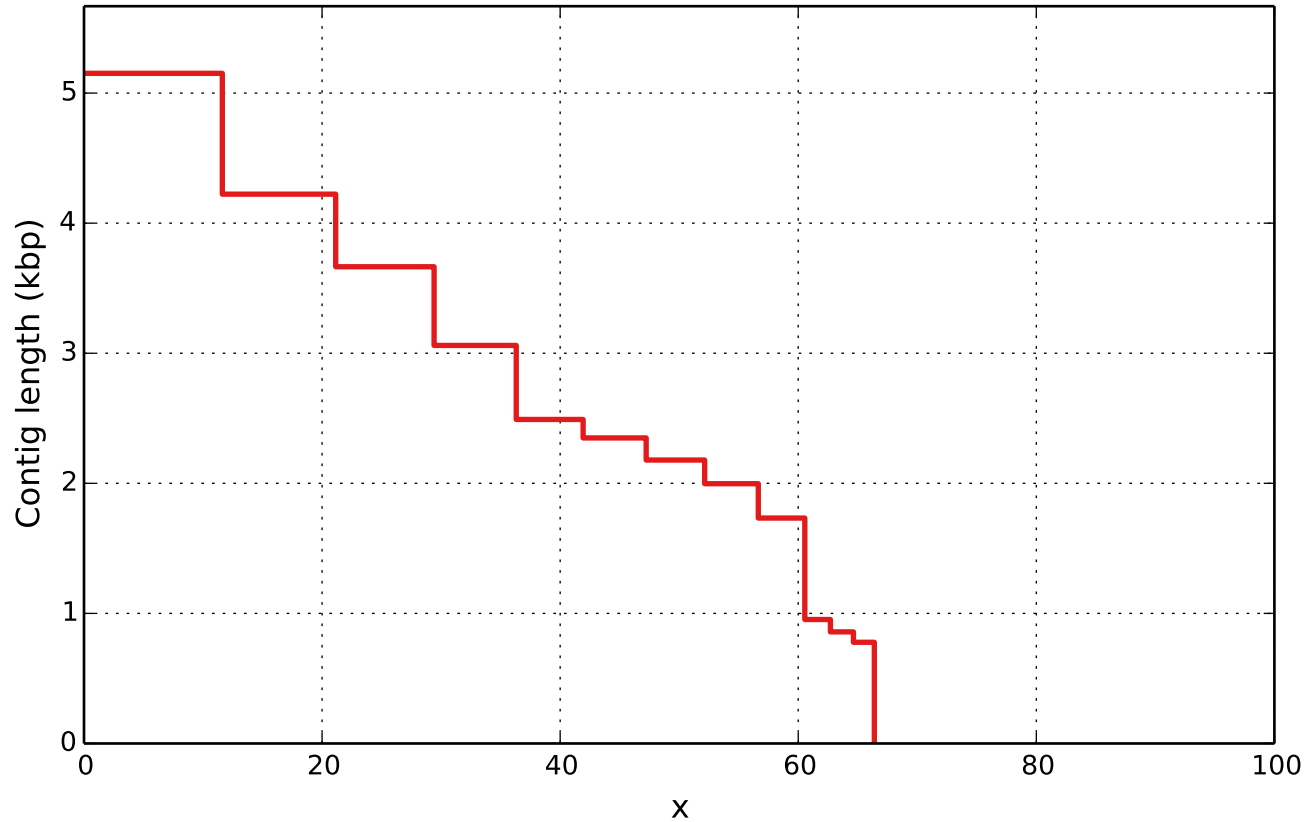

— CV115\_contigs

NGAx

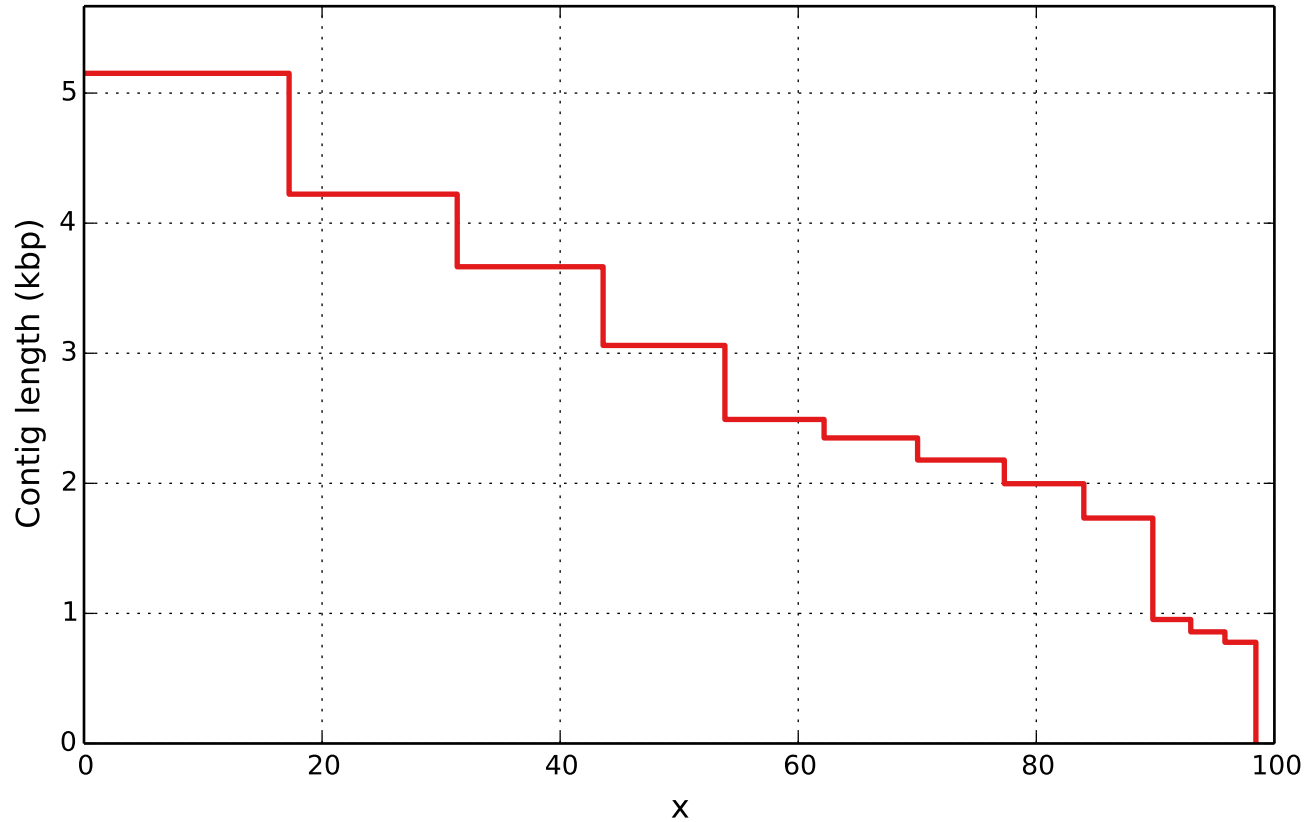

— CV115\_contigs

Cumulative # complete genomic features

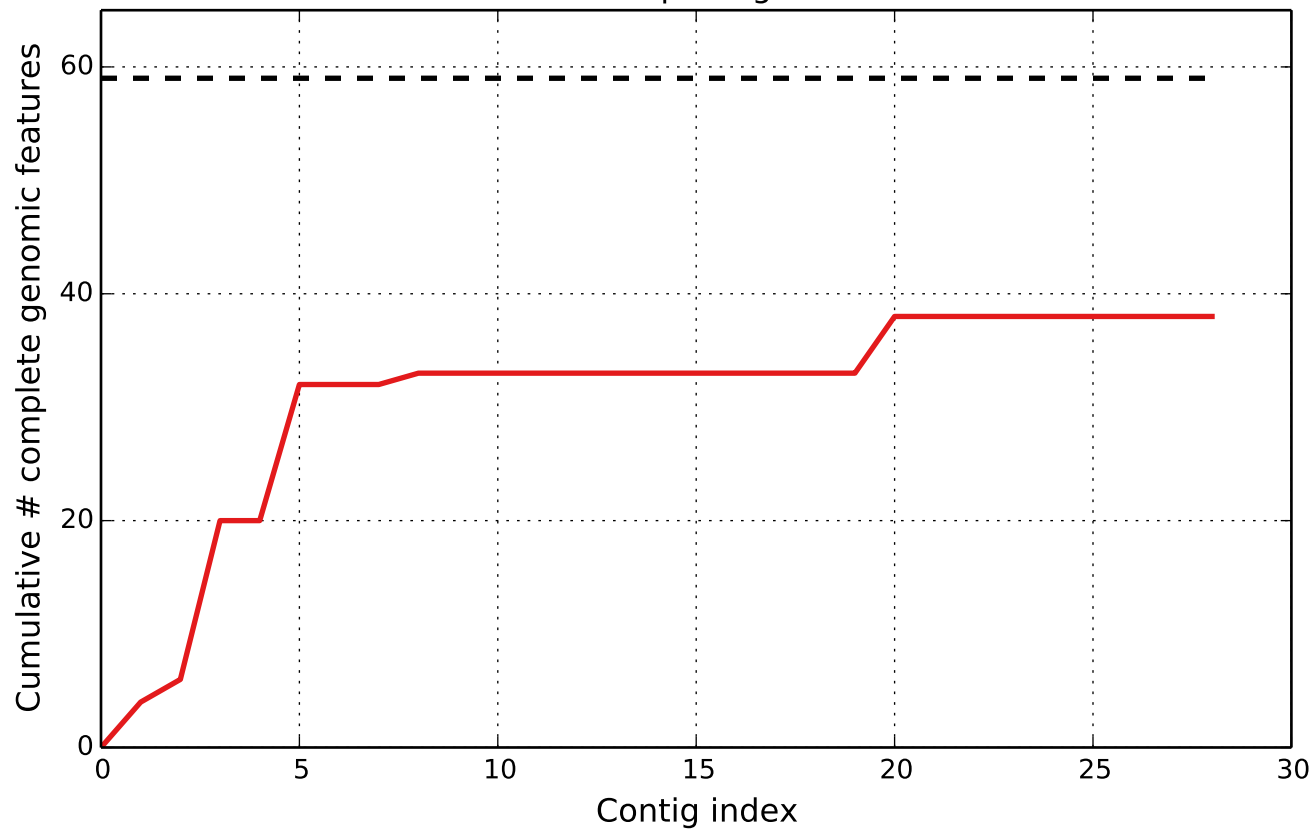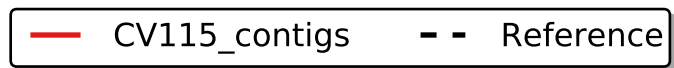

FRCurve (genomic features)

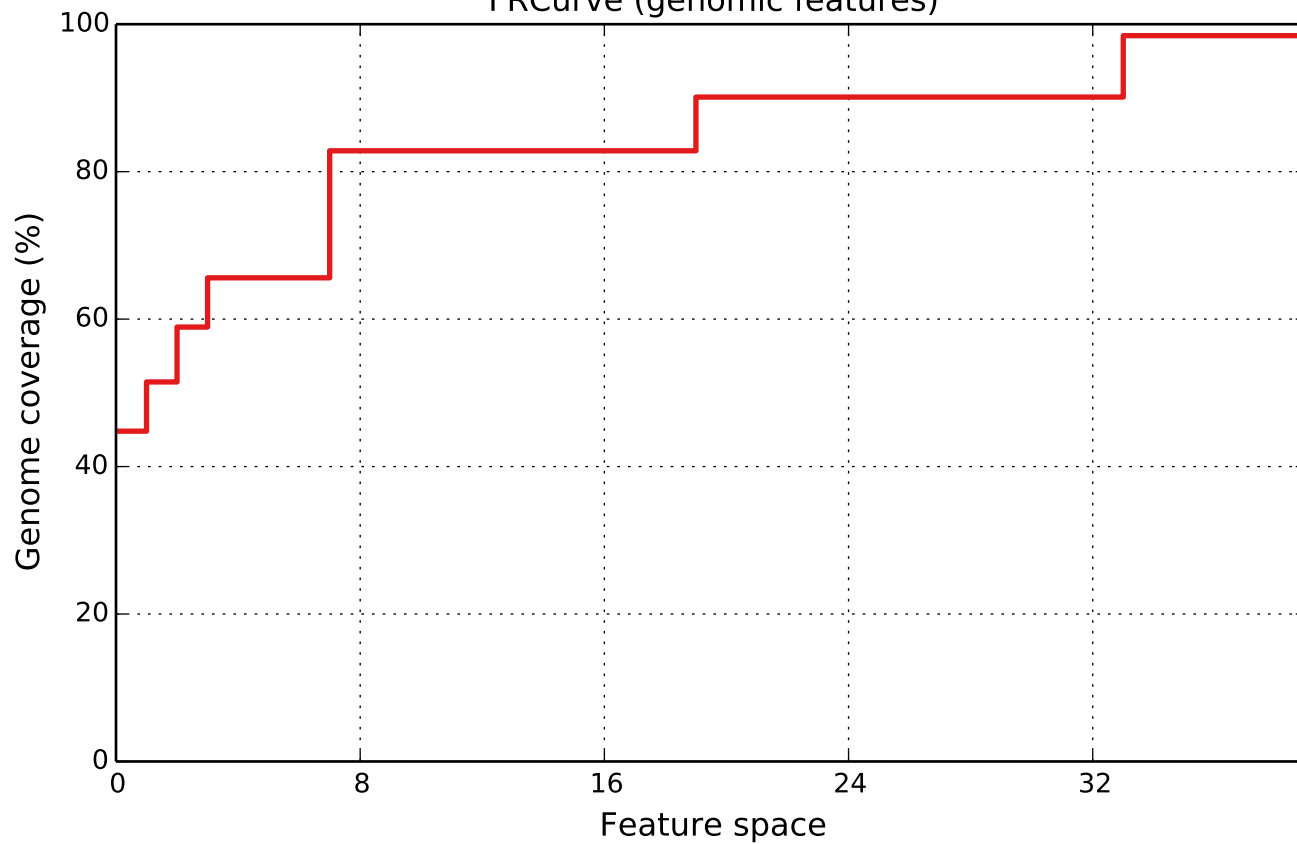

— CV115\_contigs
