# Supplementary figures and images for: VGEA: an RNA viral assembly toolkit (part 1 of 2)
Source: PeerJ journal article supplement (doi:10.7717/peerj.12129), 2021-09-06

Nx

Contig length (bp)

3000  
2400  
1800  
1200  
600  
0

0

20

40

60

80

100

x

— CV29\_velvet\_contigs

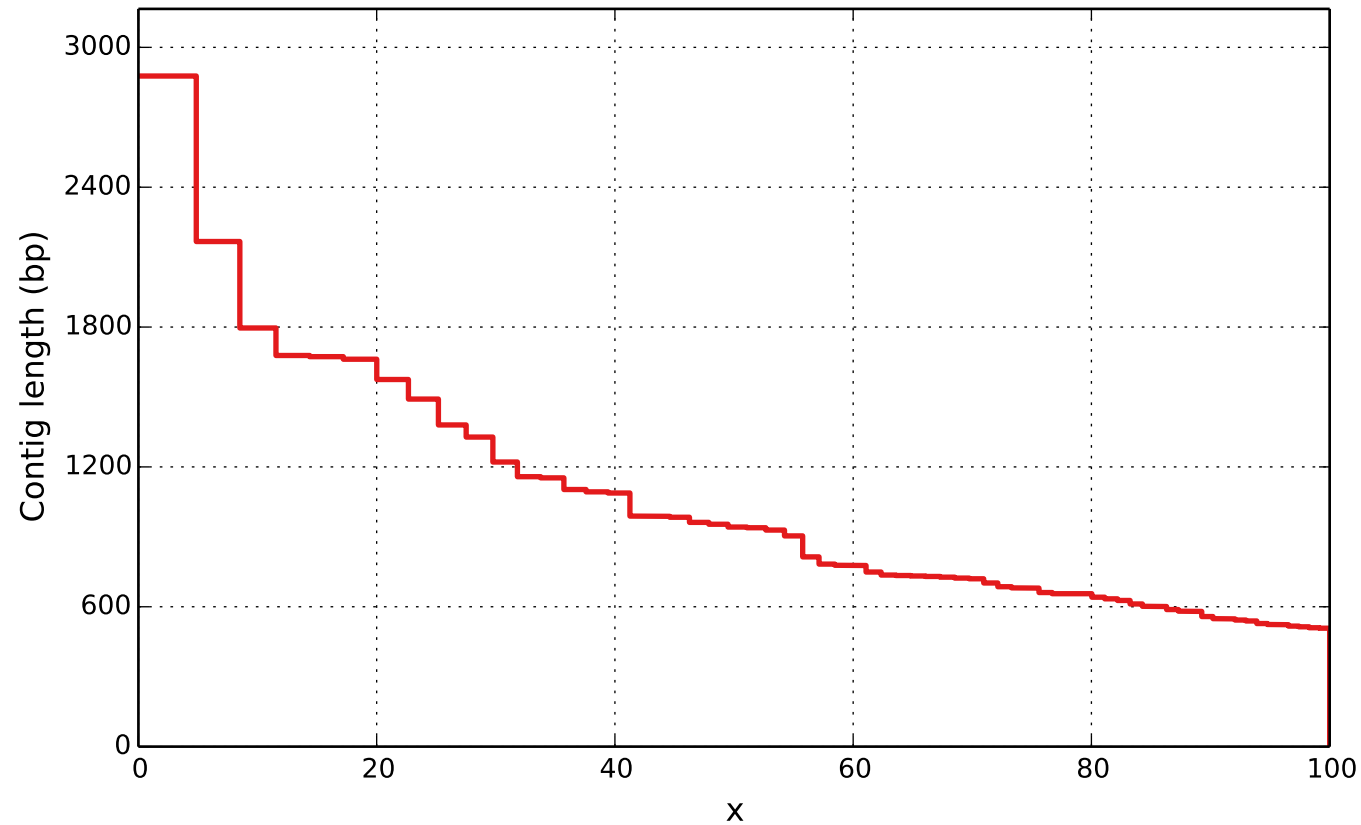

Supplement: Supplementary_File_2.zip [file Supplementary_File_2.zip]

NAx

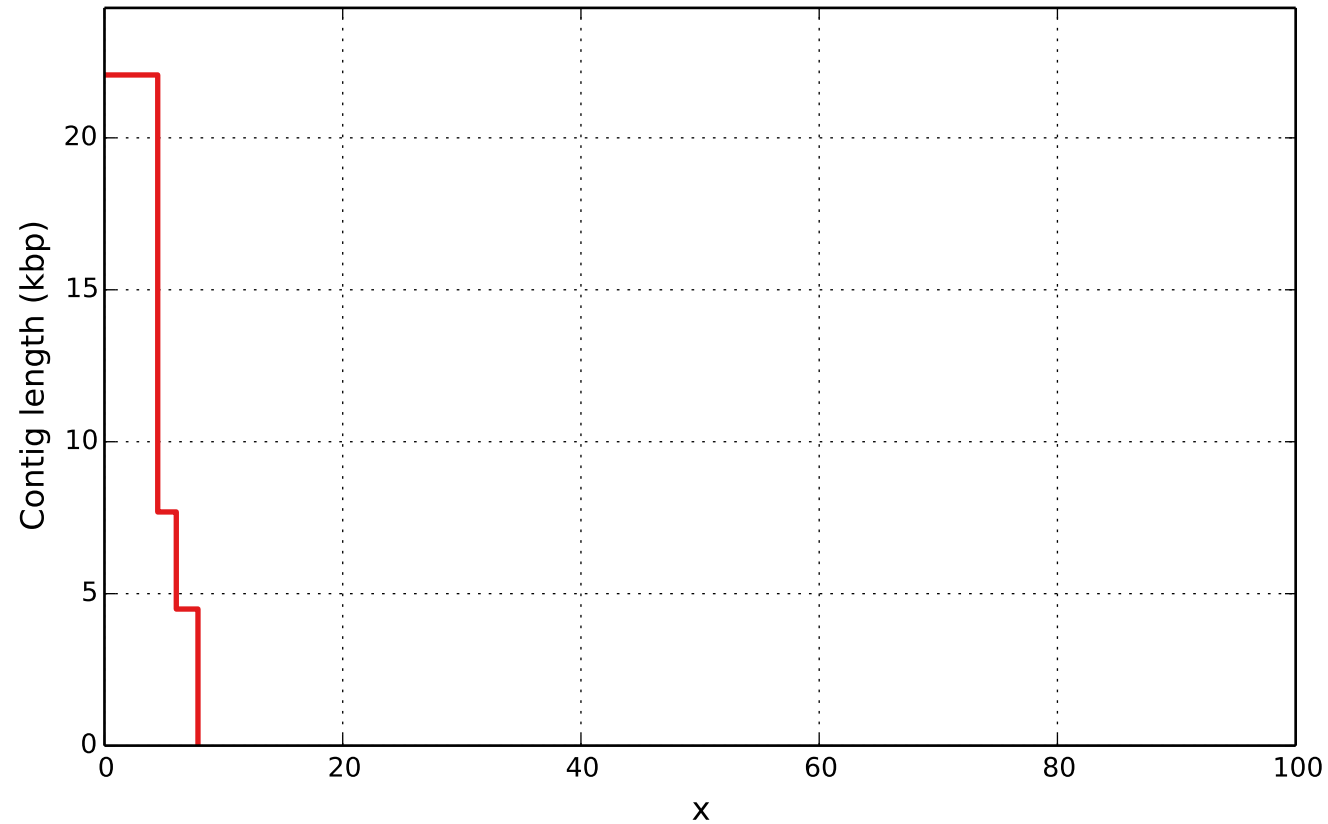

CV18\_spades\_contigs

Supplement: Supplementary_File_2.zip [file Supplementary_File_2.zip]

FRCurve (genomic features)

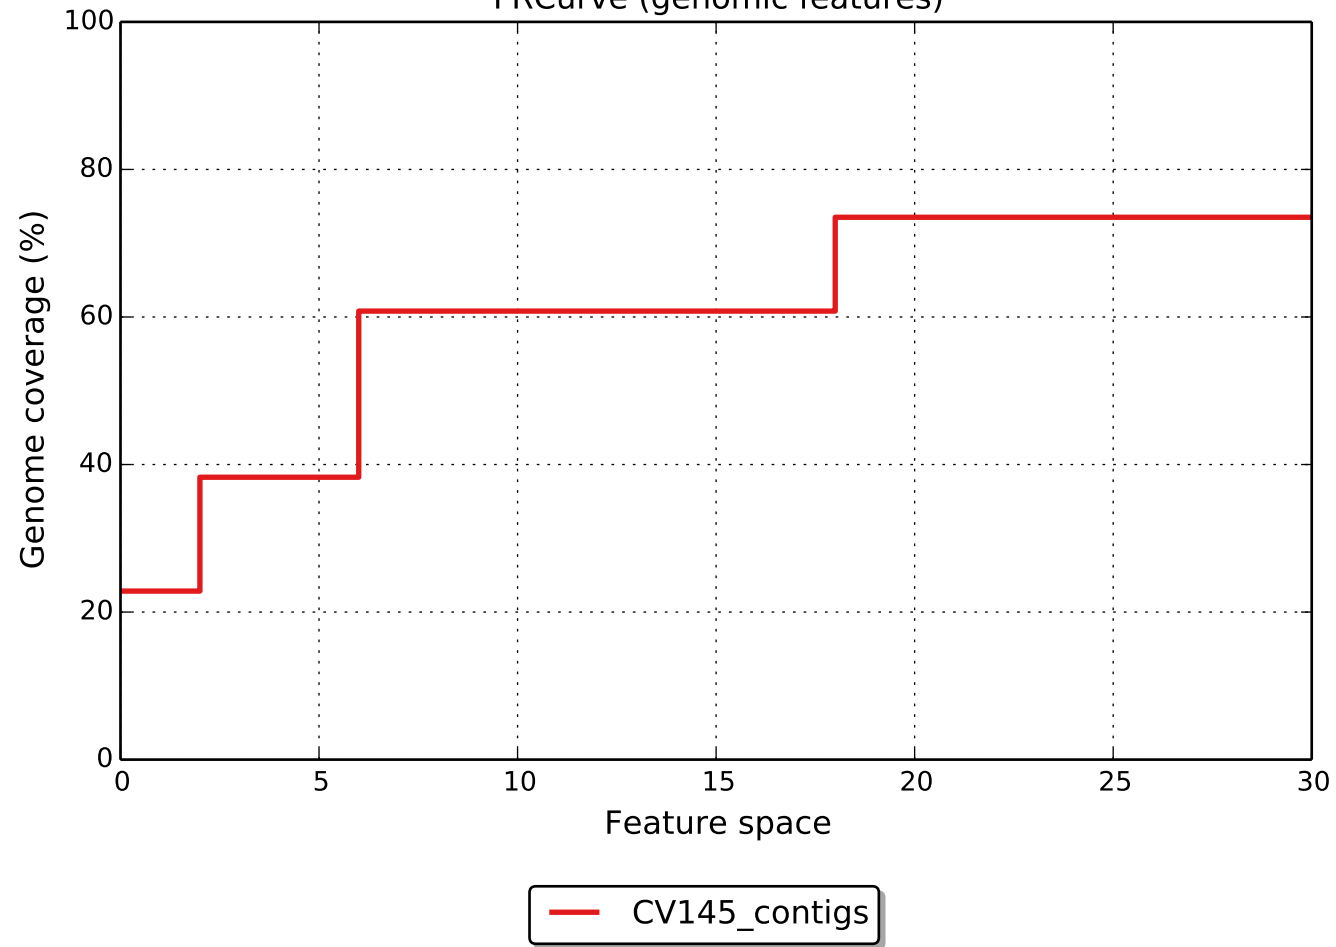

Supplement: Supplementary_File_2.zip [file Supplementary_File_2.zip]

FRCurve (misassemblies)

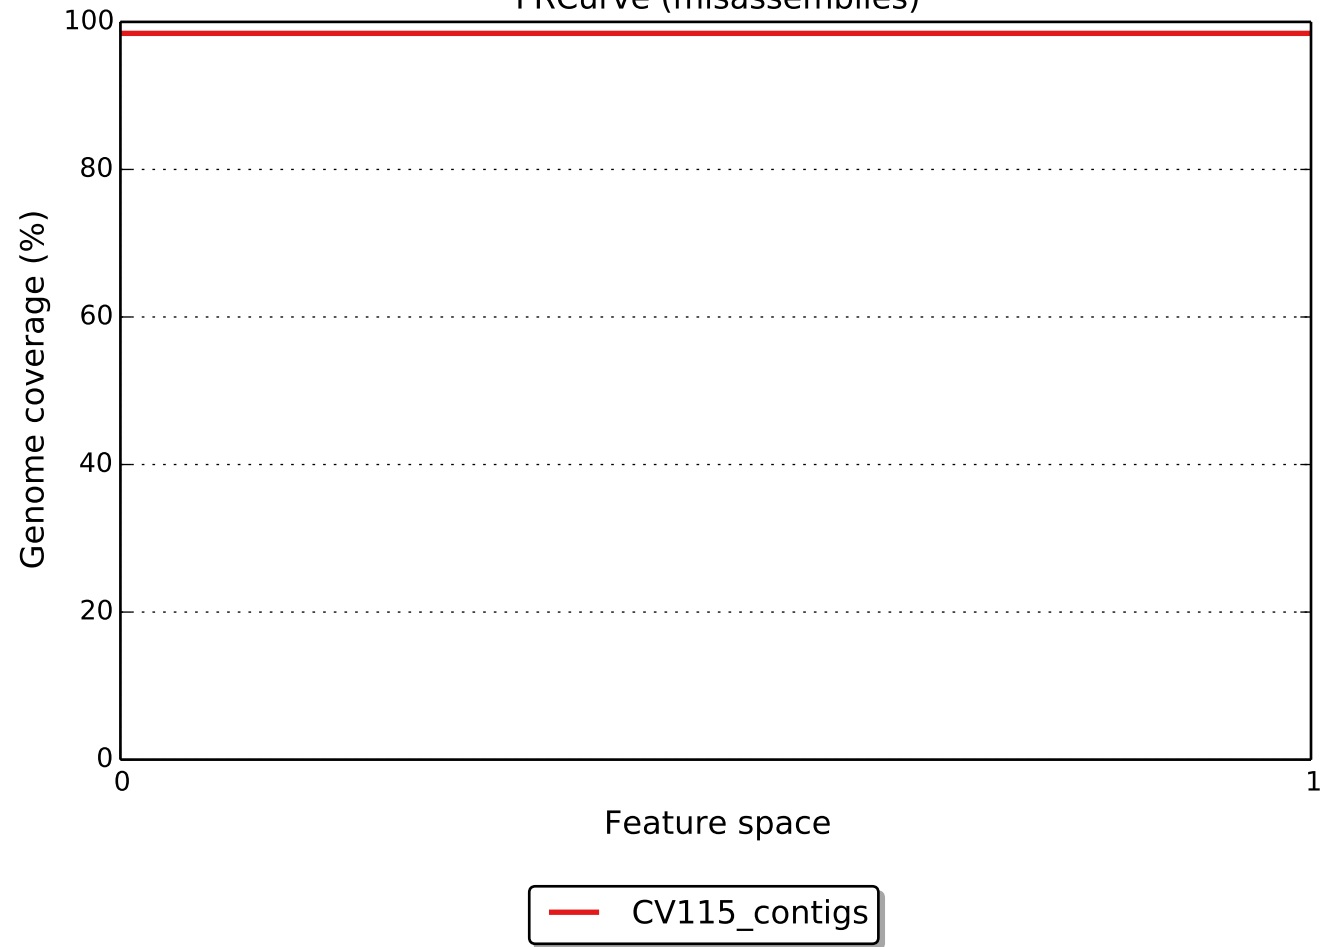

Supplement: Supplementary_File_2.zip [file Supplementary_File_2.zip]

NGx

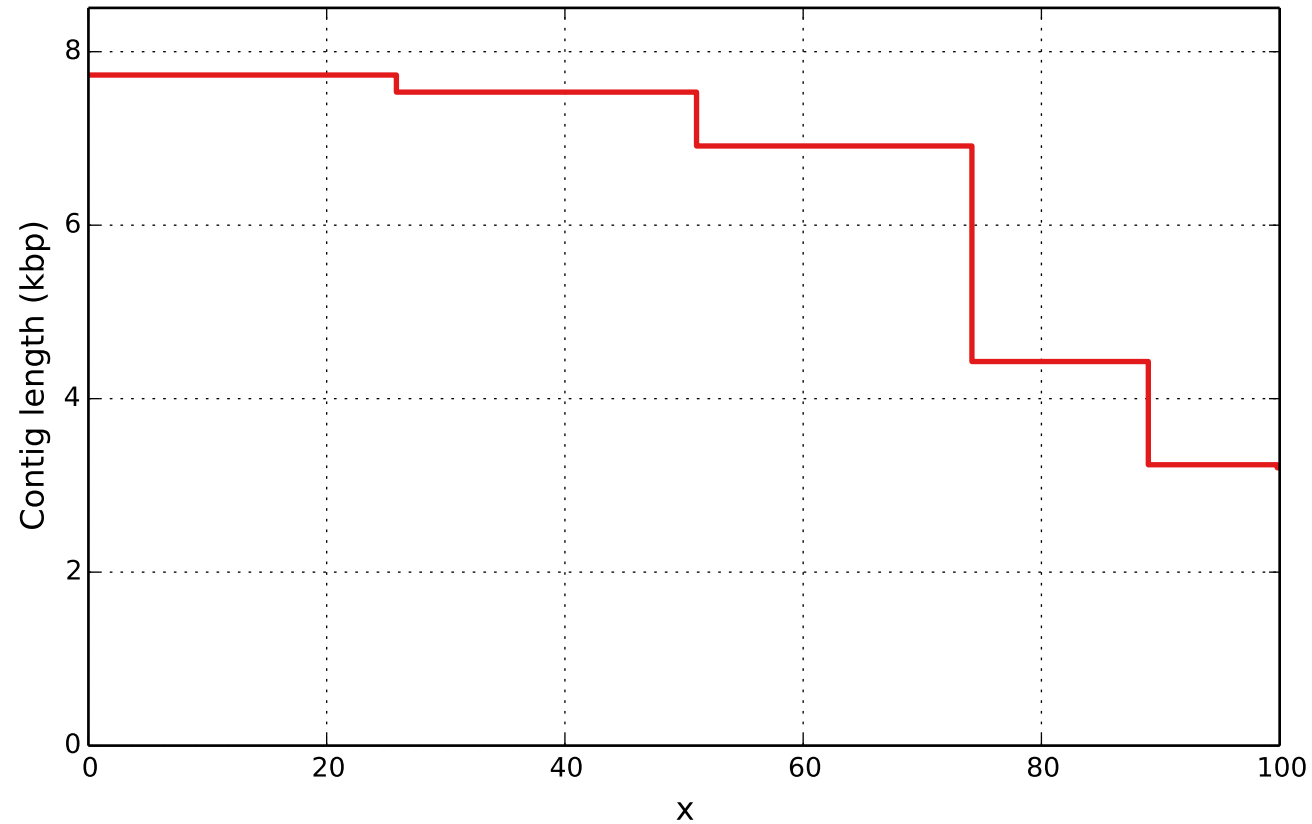

— CV29\_contigs

Supplement: Supplementary_File_2.zip [file Supplementary_File_2.zip]

CV29\_contigs GC content

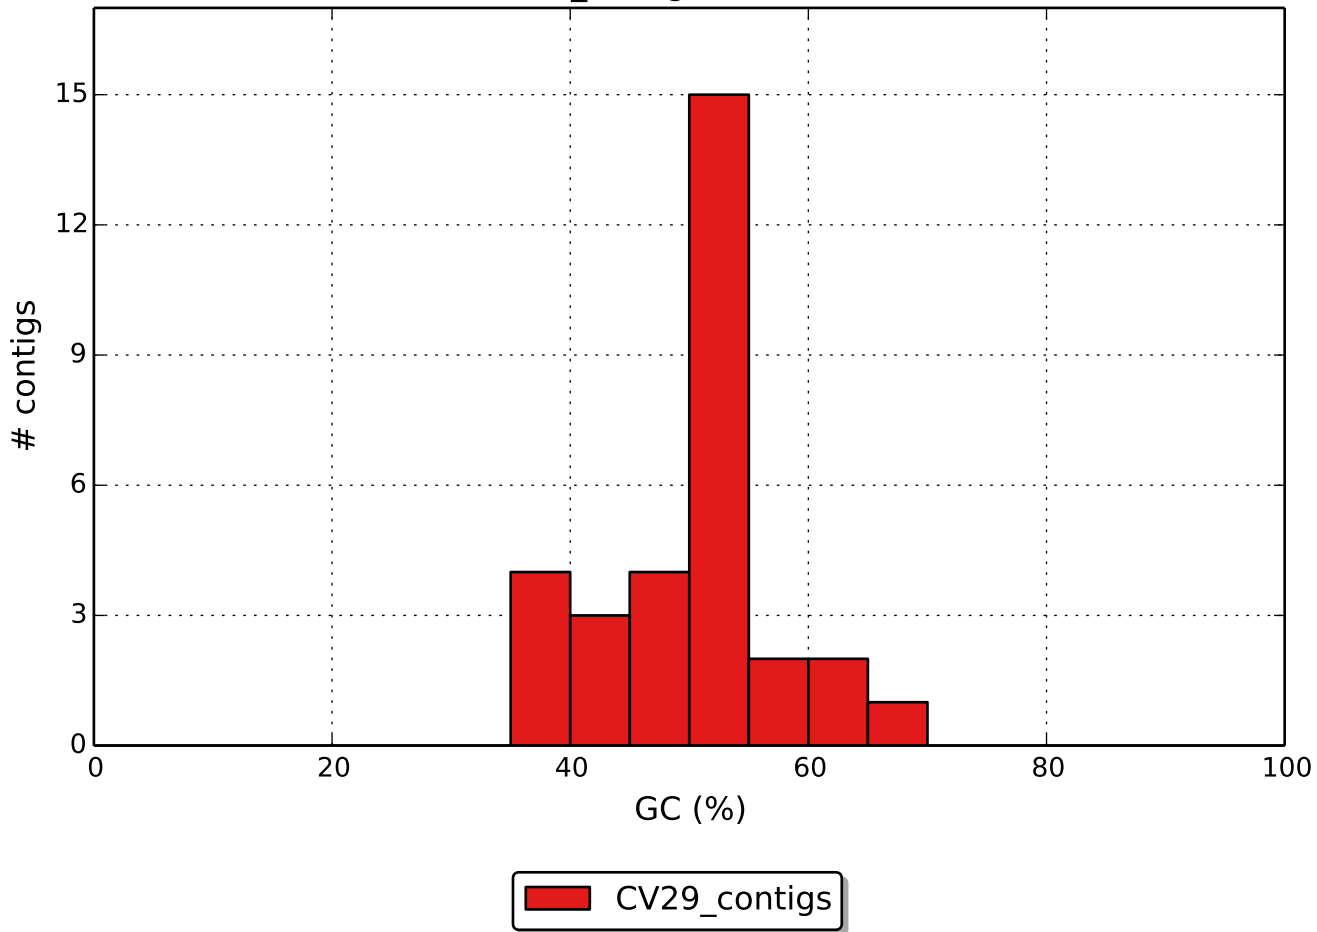

Supplement: Supplementary_File_2.zip [file Supplementary_File_2.zip]

NGAx

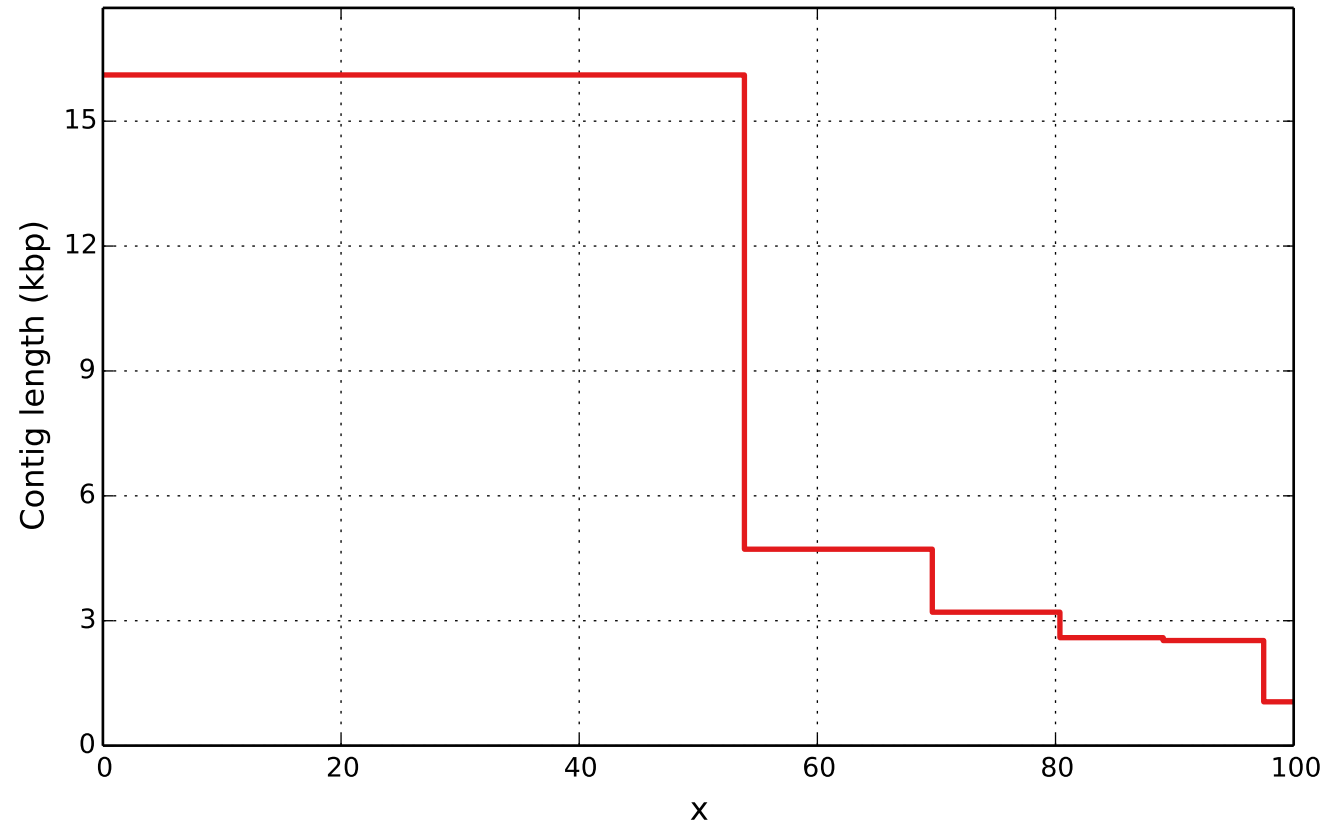

— CV45\_contigs

Supplement: Supplementary_File_2.zip [file Supplementary_File_2.zip]

Cumulative # complete genomic features

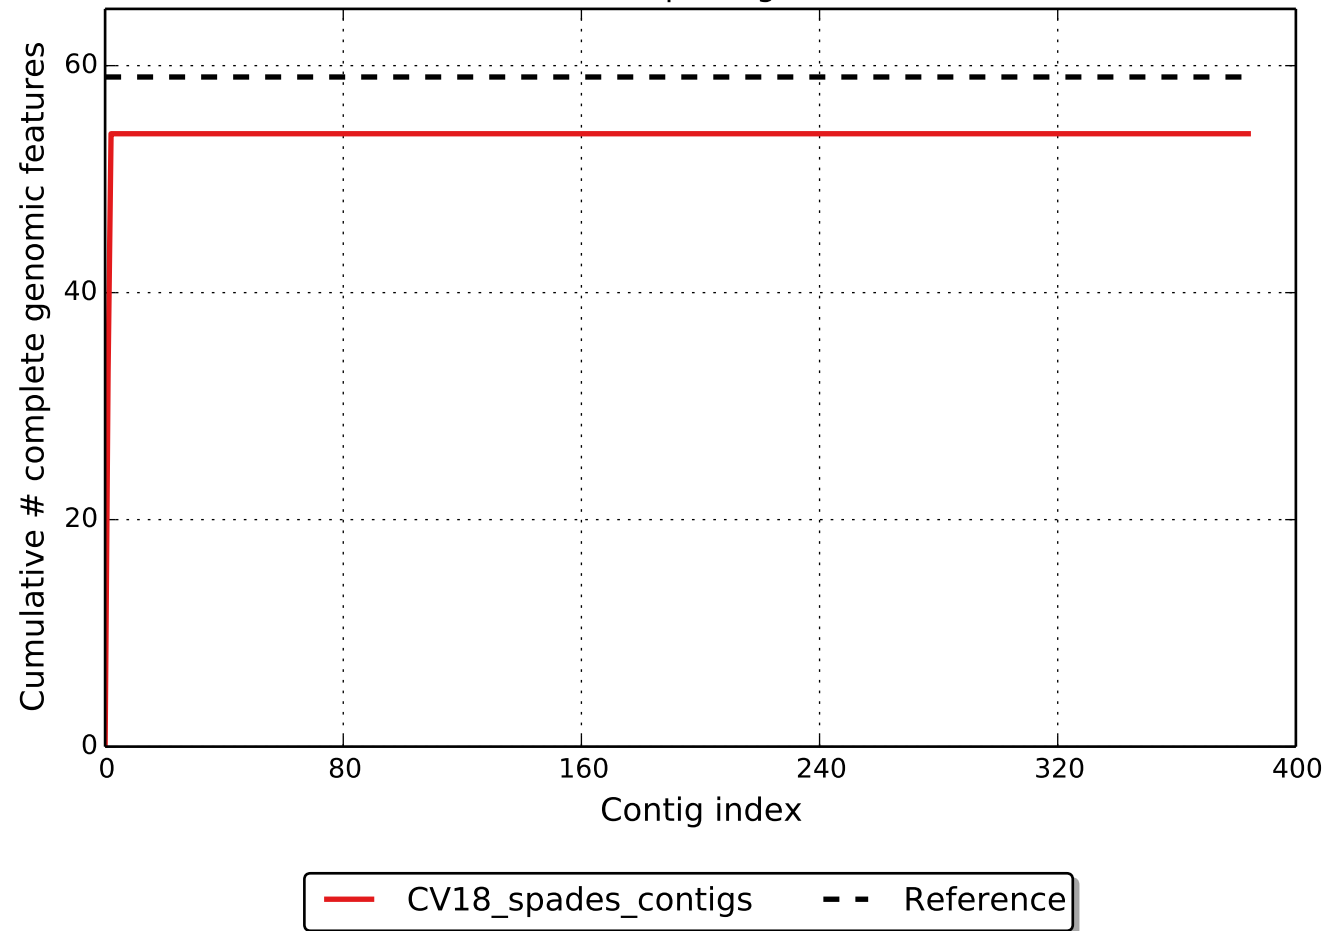

Supplement: Supplementary_File_2.zip [file Supplementary_File_2.zip]

Cumulative # complete genomic features

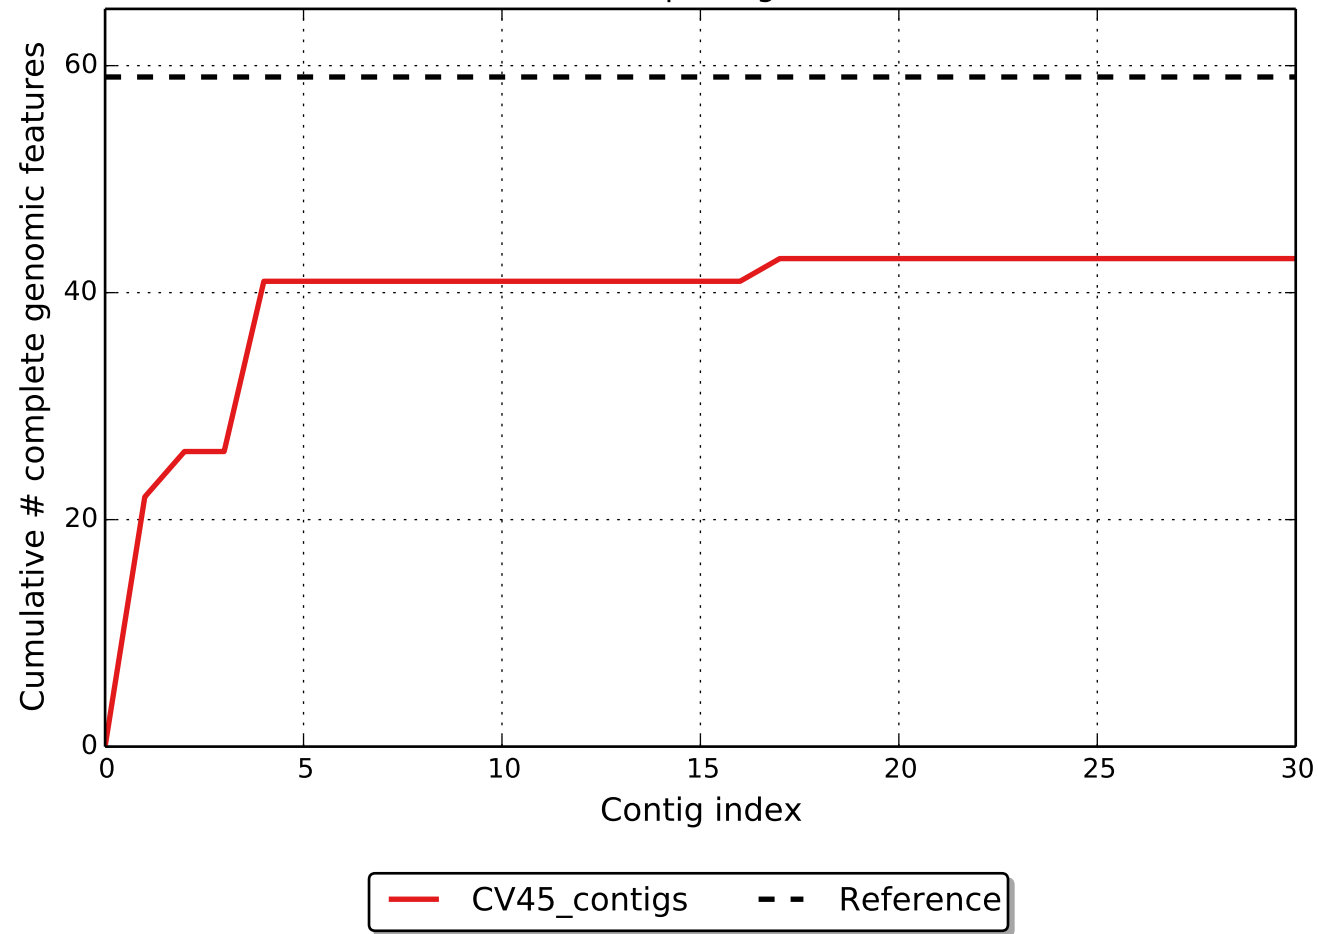

Supplement: Supplementary_File_2.zip [file Supplementary_File_2.zip]

NGx

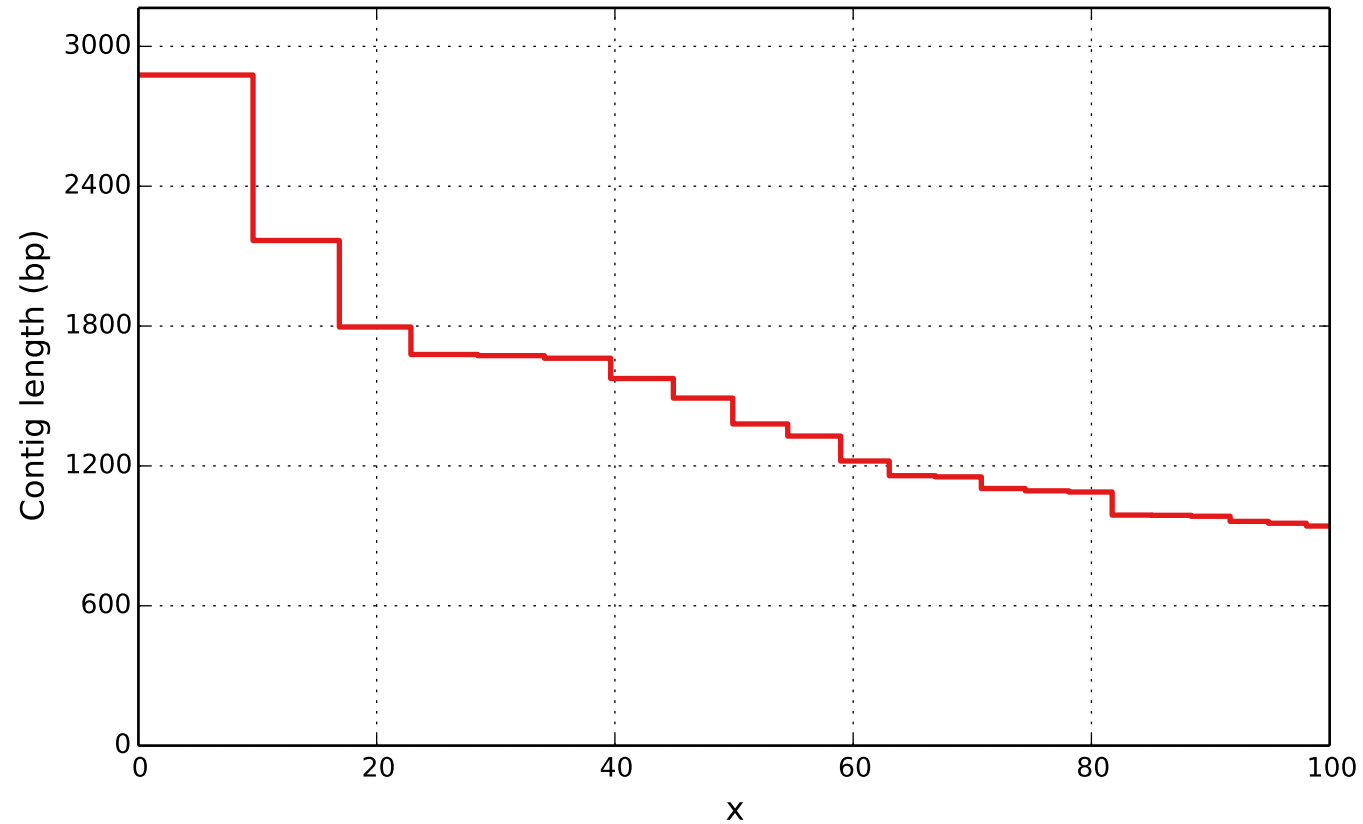

— CV29\_velvet\_contigs

Supplement: Supplementary_File_2.zip [file Supplementary_File_2.zip]

NGx

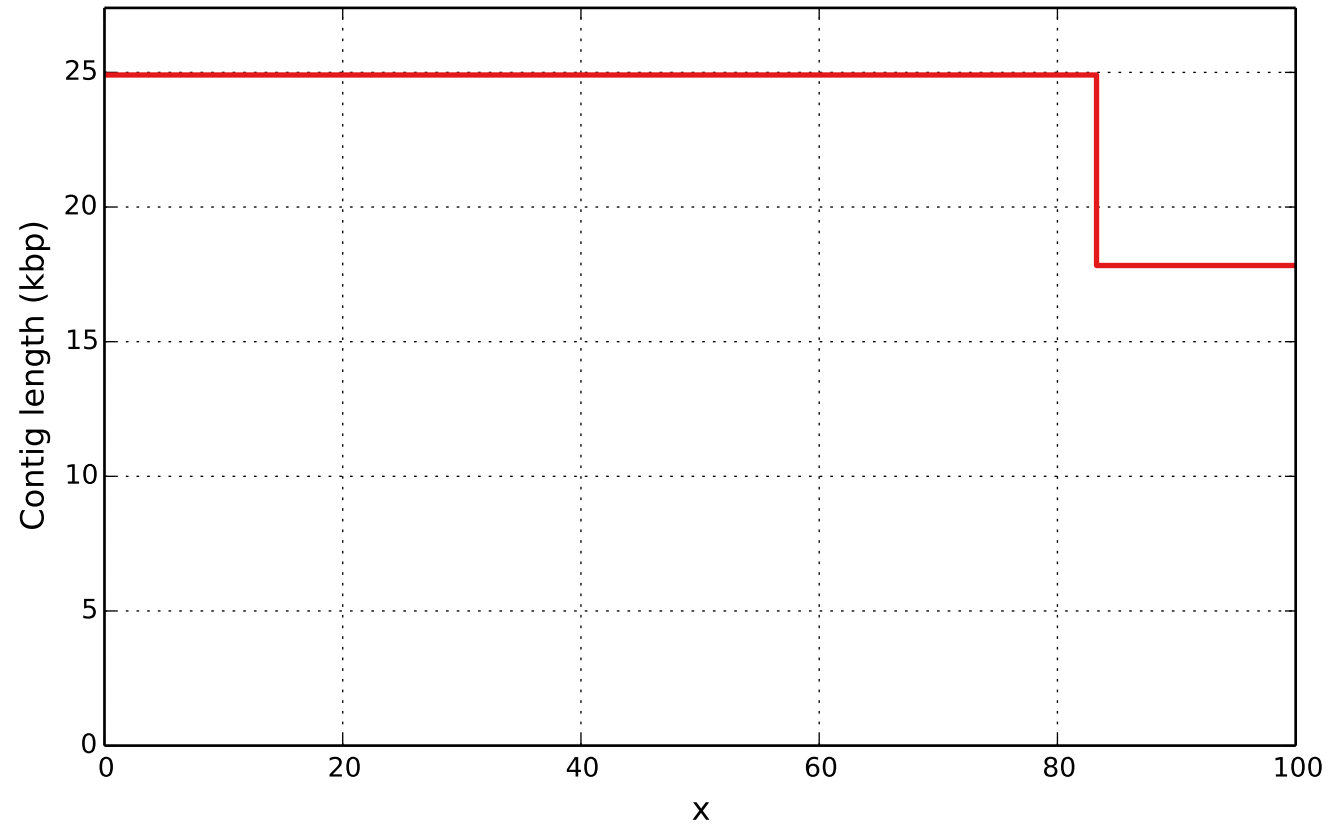

— CV29\_spades\_contigs

Supplement: Supplementary_File_2.zip [file Supplementary_File_2.zip]

FRCurve (genomic features)

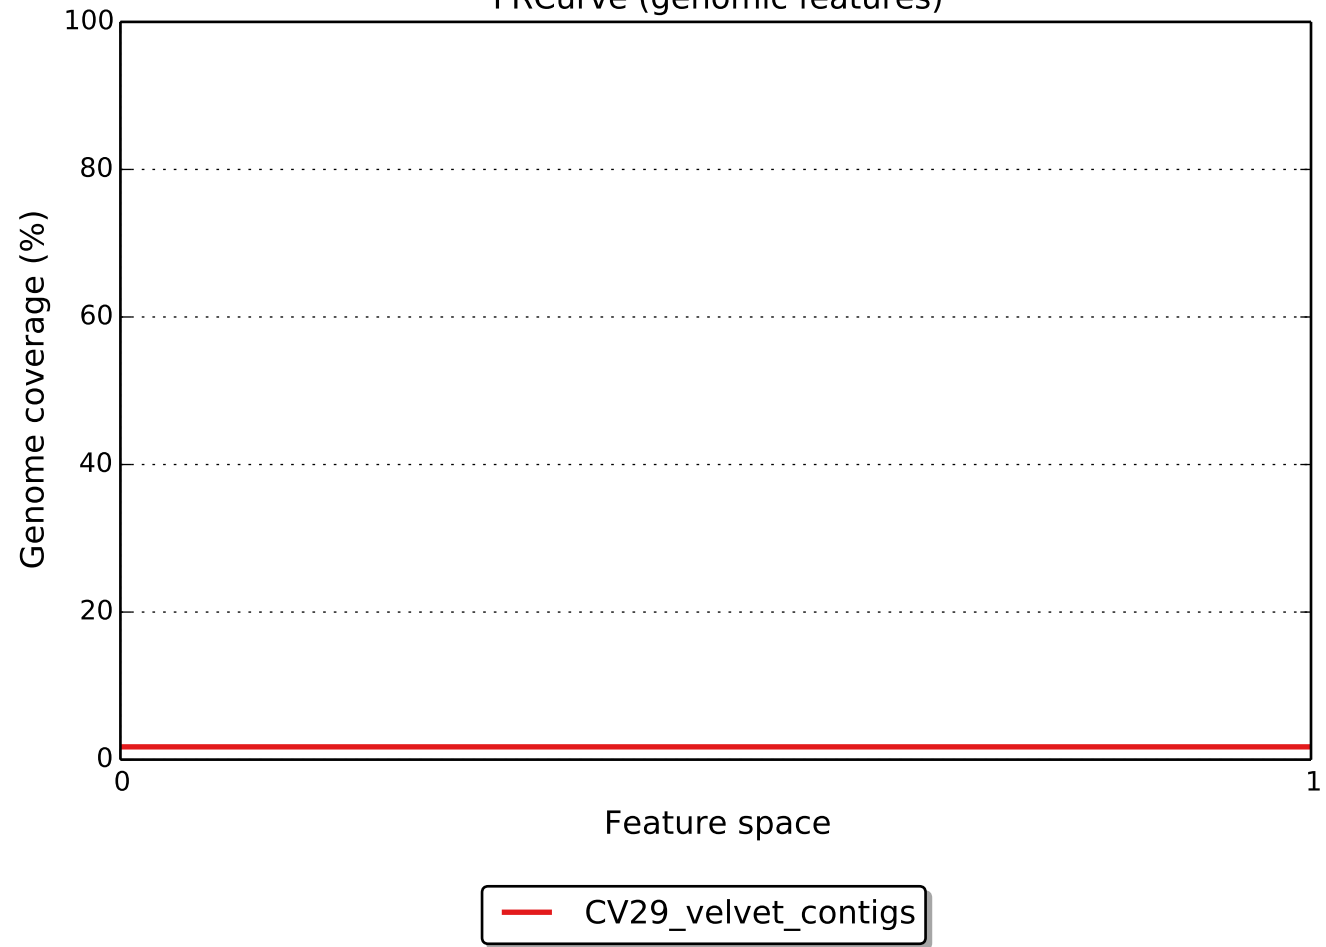

Supplement: Supplementary_File_2.zip [file Supplementary_File_2.zip]

Cumulative length (aligned contigs)

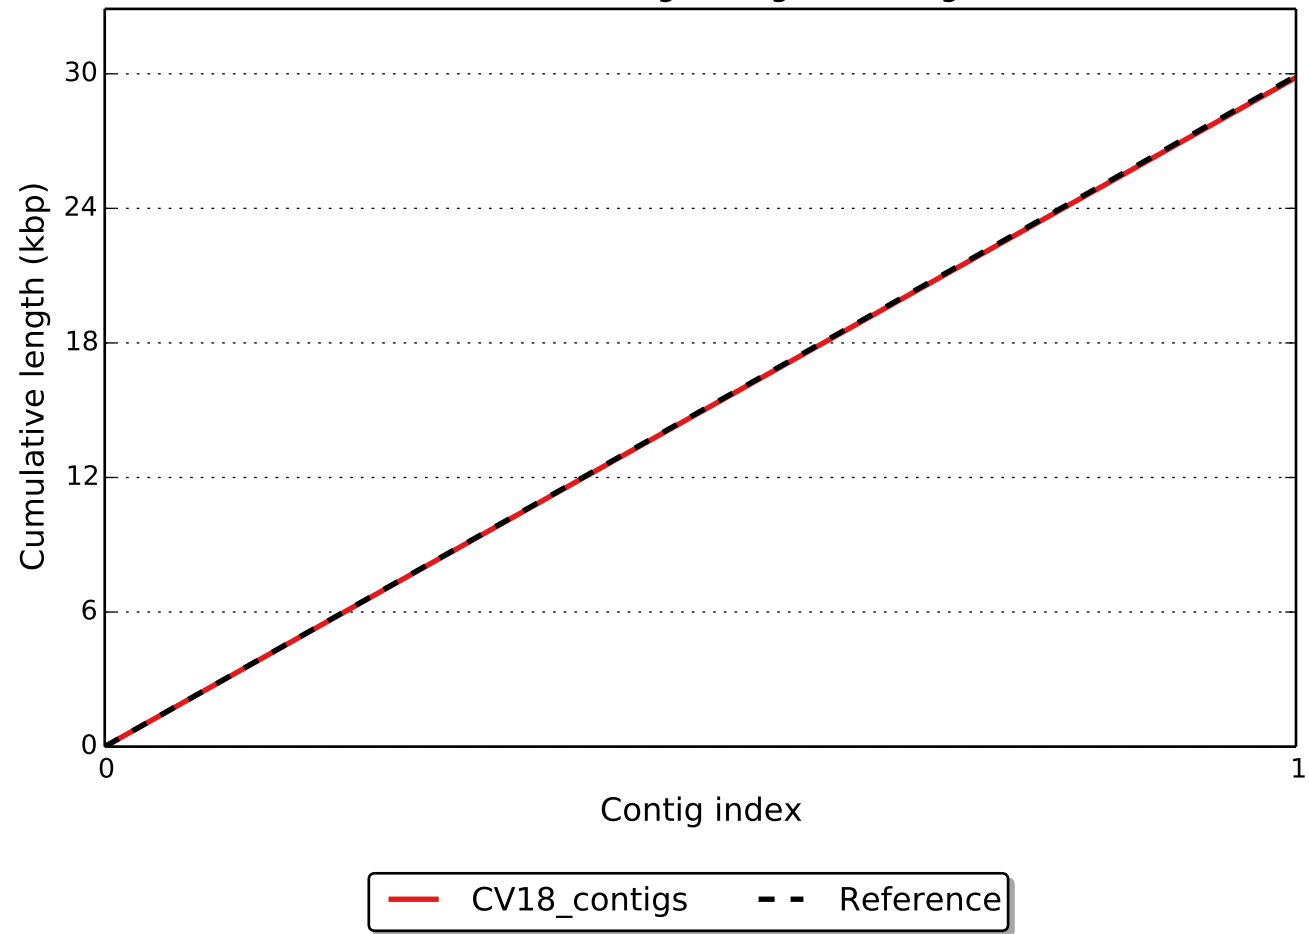

Supplement: Supplementary_File_2.zip [file Supplementary_File_2.zip]

FRCurve (misassemblies)

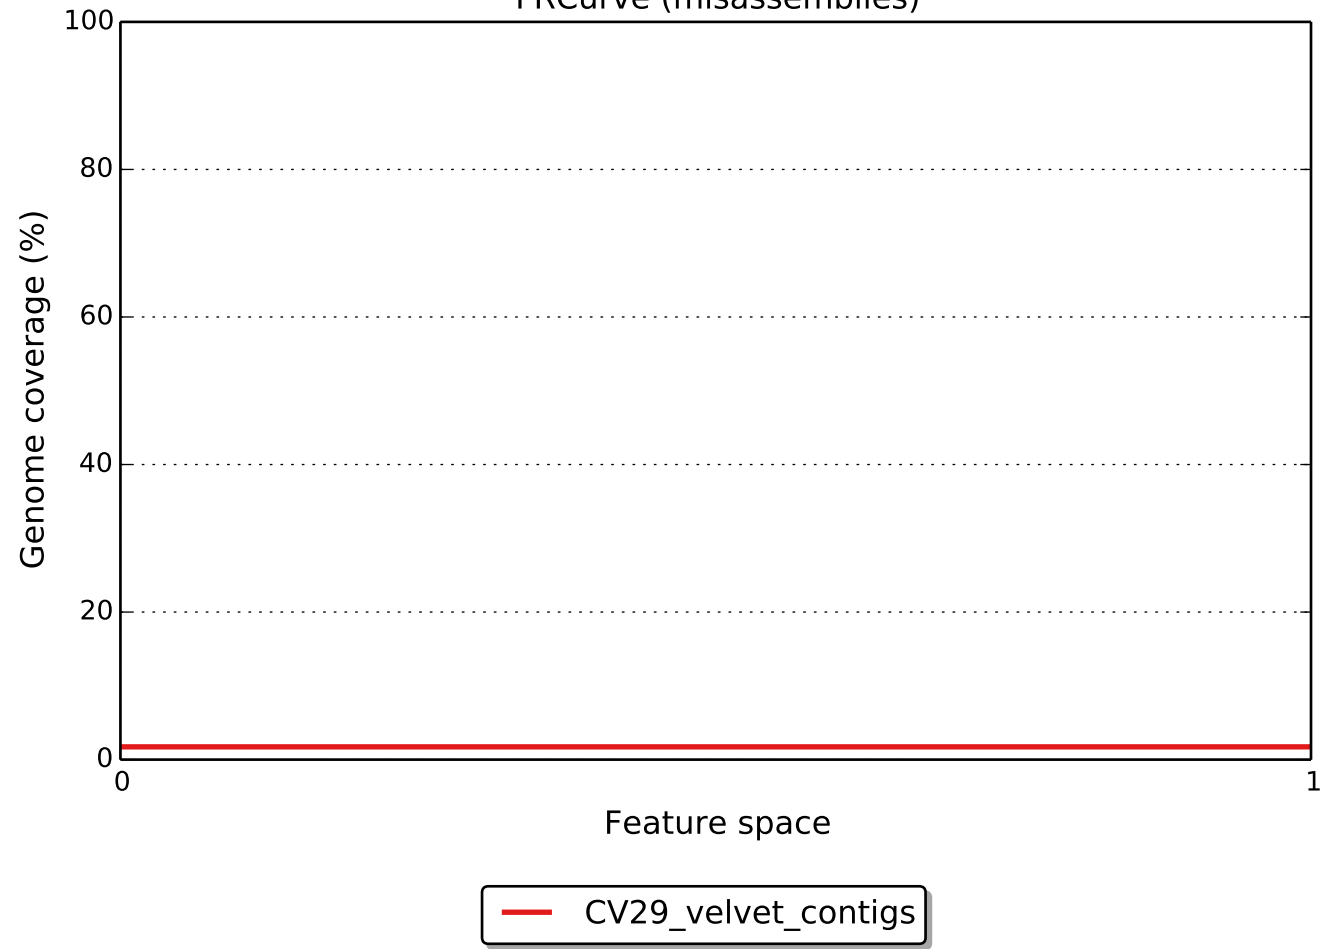

Supplement: Supplementary_File_2.zip [file Supplementary_File_2.zip]

# NGAx

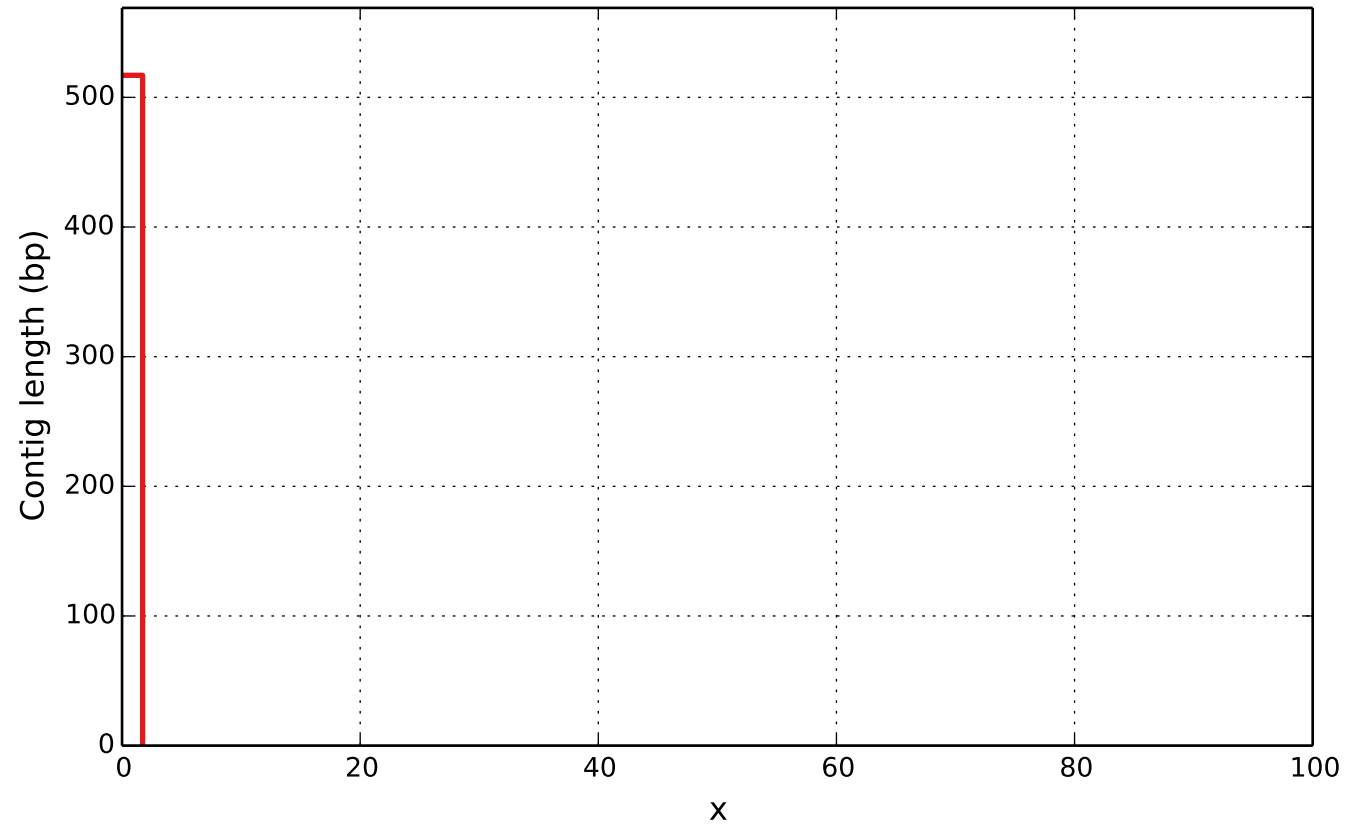

— CV29\_velvet\_contigs

Supplement: Supplementary_File_2.zip [file Supplementary_File_2.zip]

# NGAx

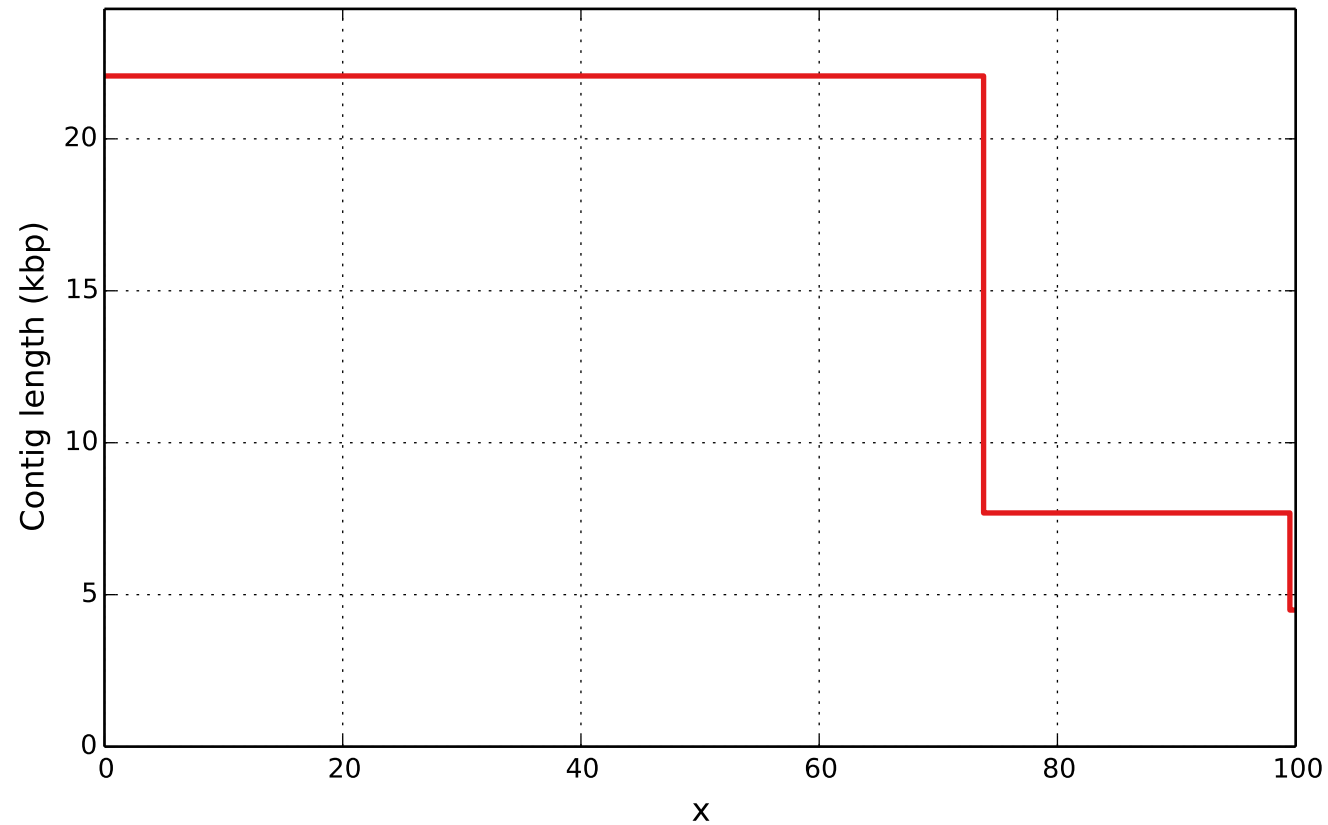

— CV18\_spades\_contigs

Supplement: Supplementary_File_2.zip [file Supplementary_File_2.zip]

FRCurve (genomic features)

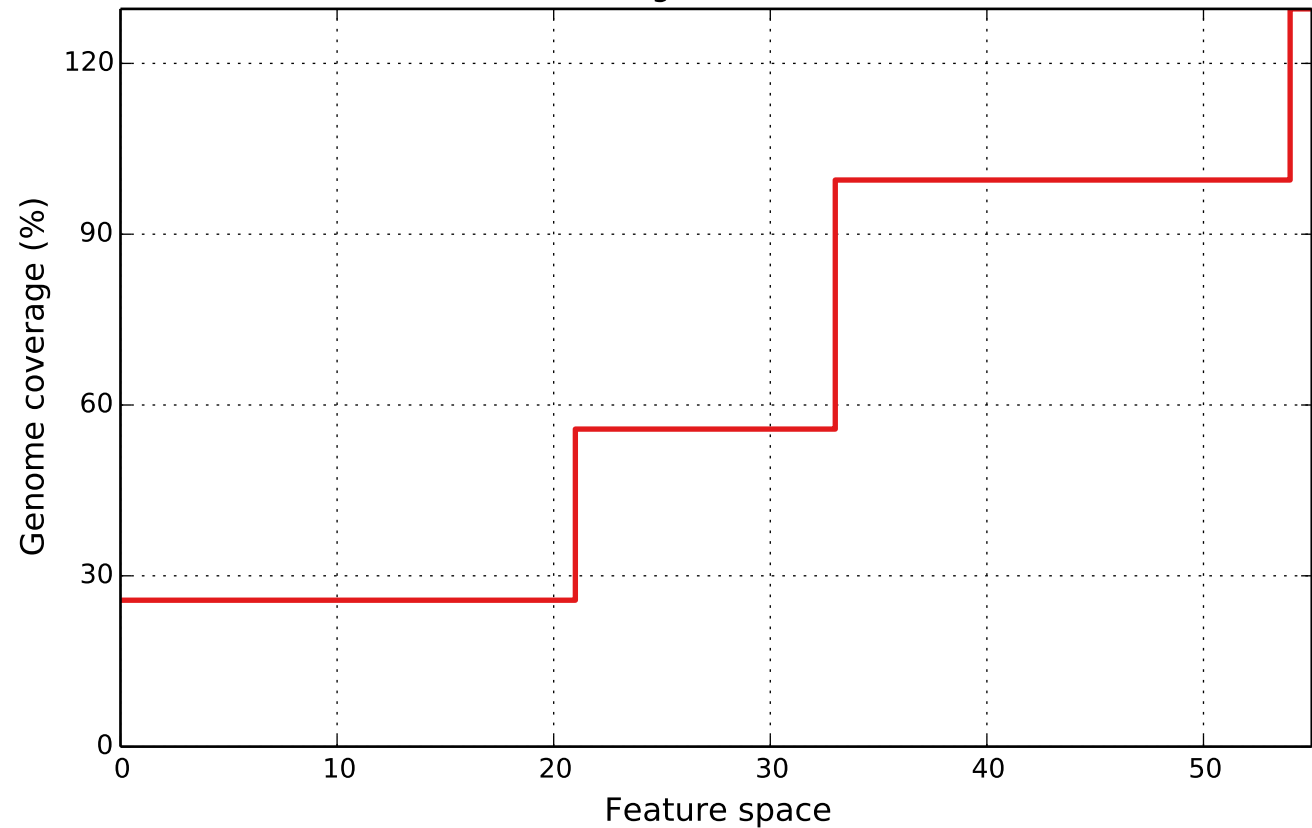

— CV18\_spades\_contigs

Supplement: Supplementary_File_2.zip [file Supplementary_File_2.zip]

Cumulative # complete genomic features

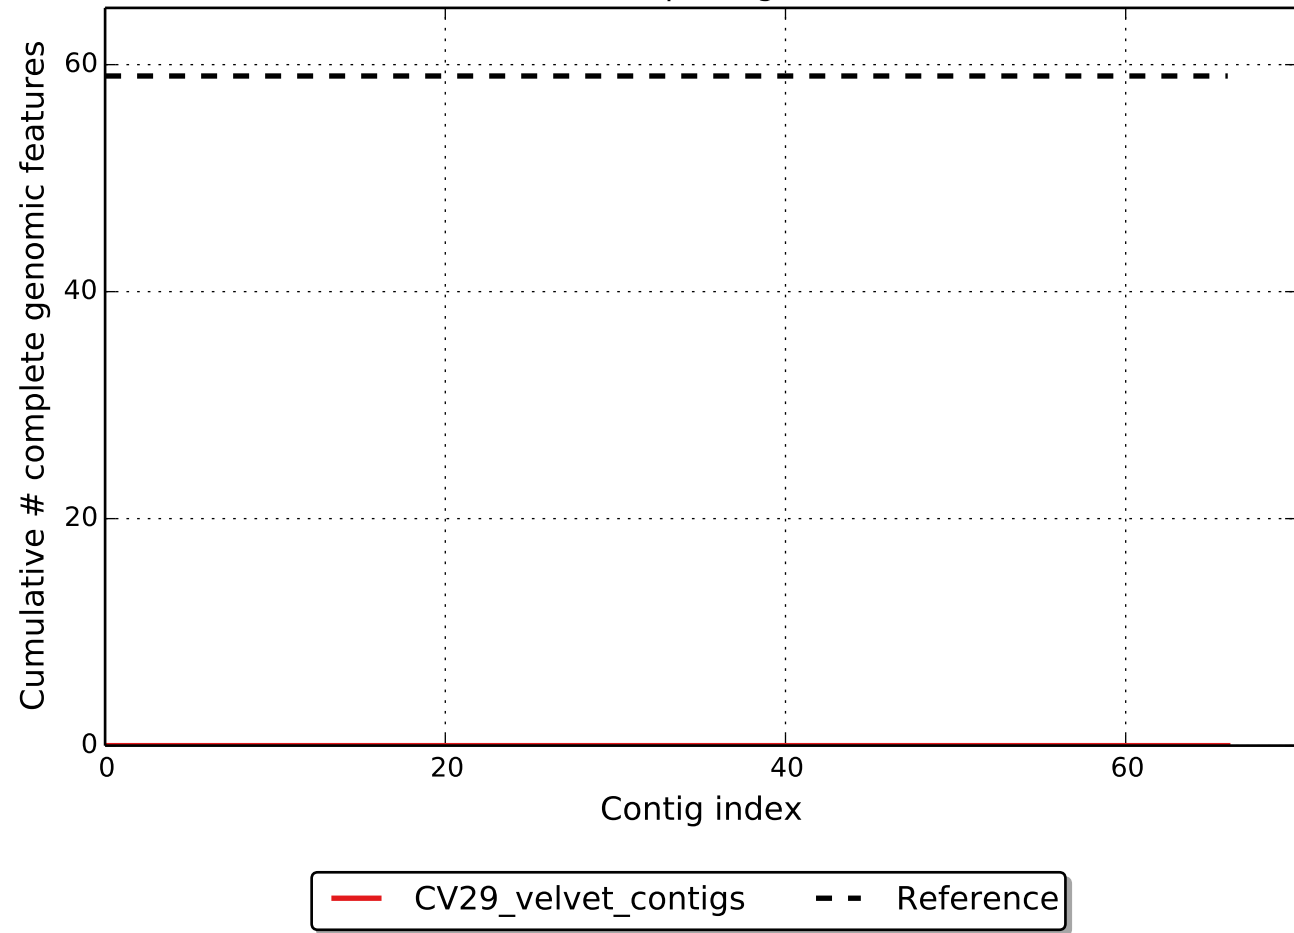

Supplement: Supplementary_File_2.zip [file Supplementary_File_2.zip]

Cumulative length

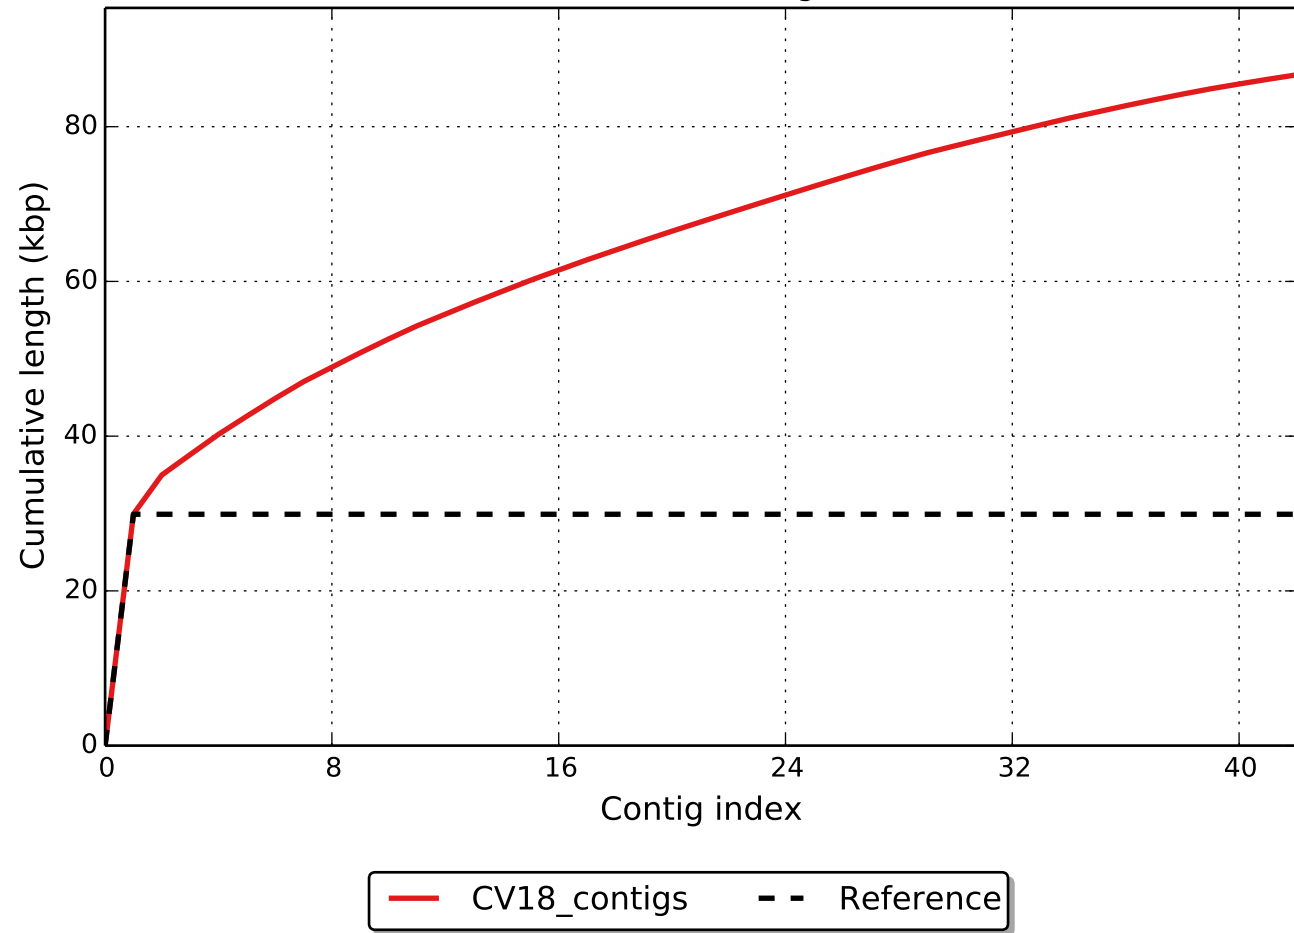

Supplement: Supplementary_File_2.zip [file Supplementary_File_2.zip]

Nx

Contig length (kbp)

15

12

9

6

3

0

0

20

40

60

80

100

x

CV45\_contigs

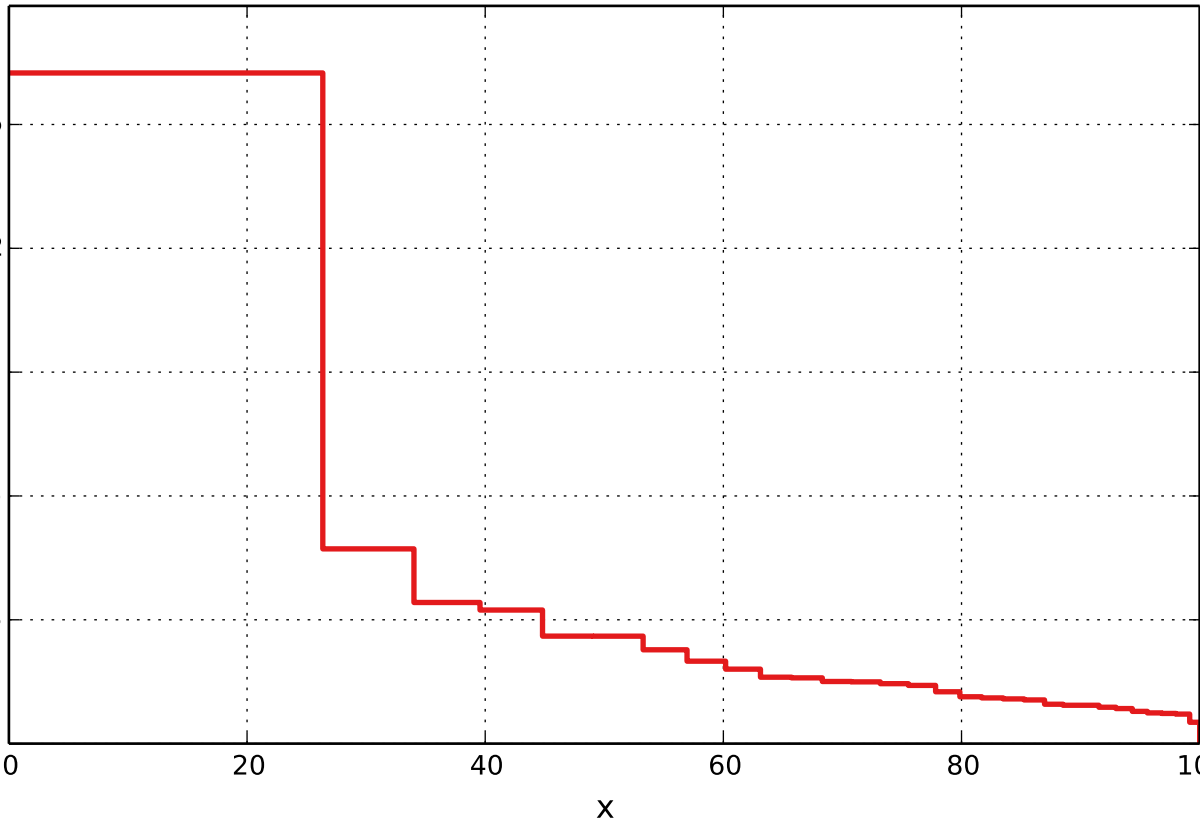

Supplement: Supplementary_File_2.zip [file Supplementary_File_2.zip]

NGx

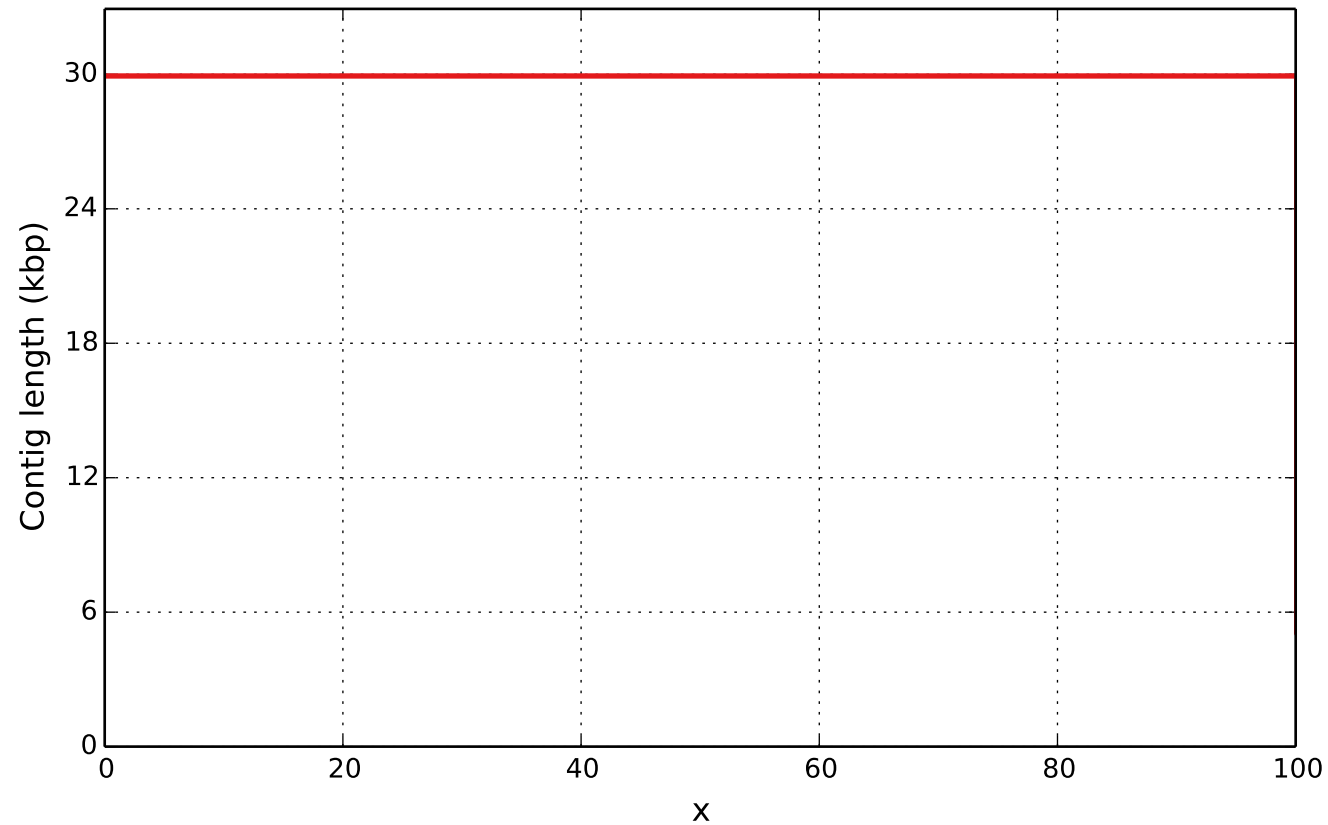

— CV18\_contigs

Supplement: Supplementary_File_2.zip [file Supplementary_File_2.zip]

Cumulative length (aligned contigs)

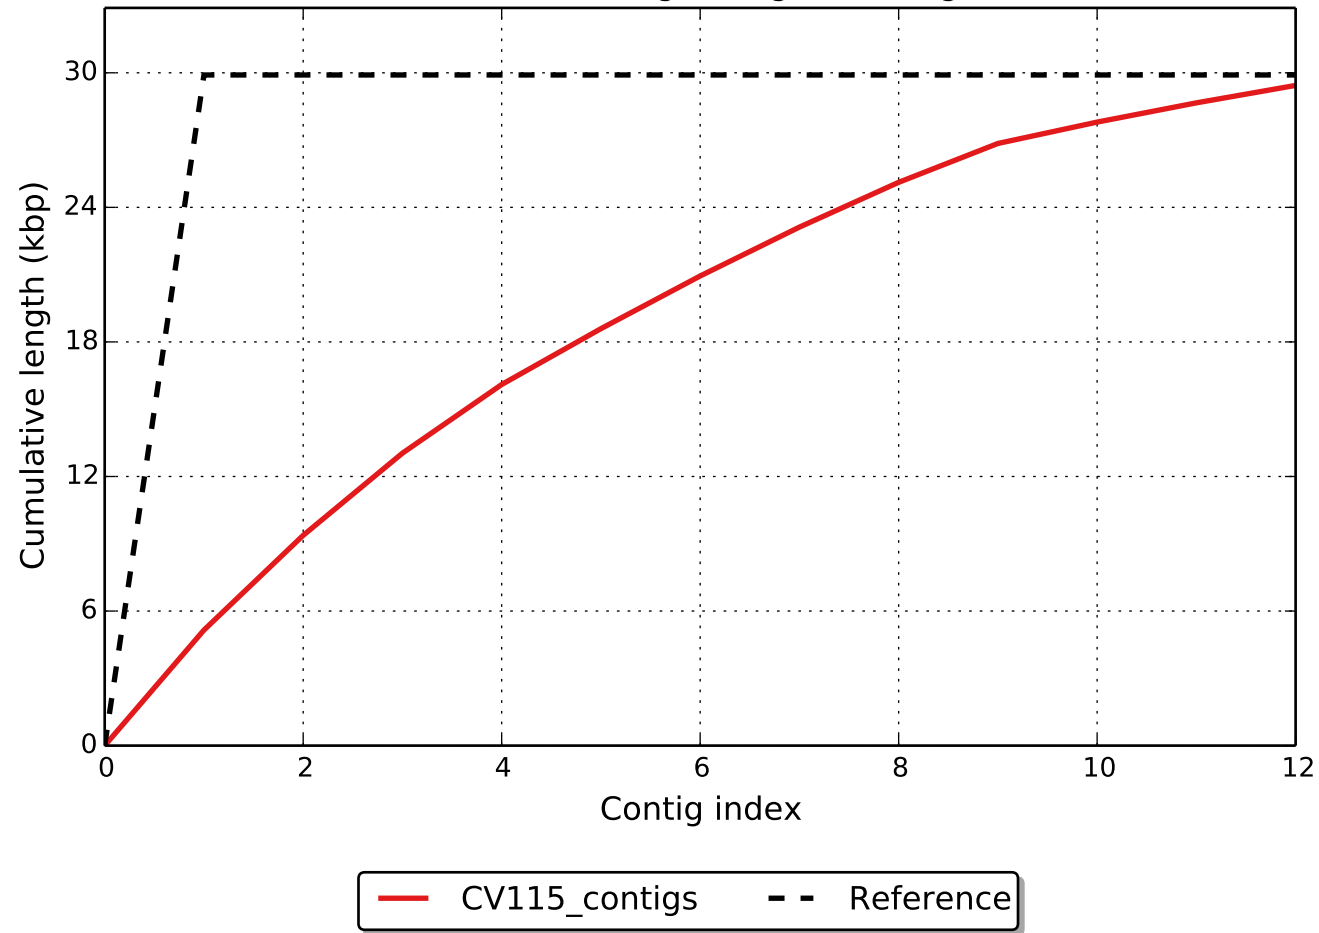

Supplement: Supplementary_File_2.zip [file Supplementary_File_2.zip]

Nx

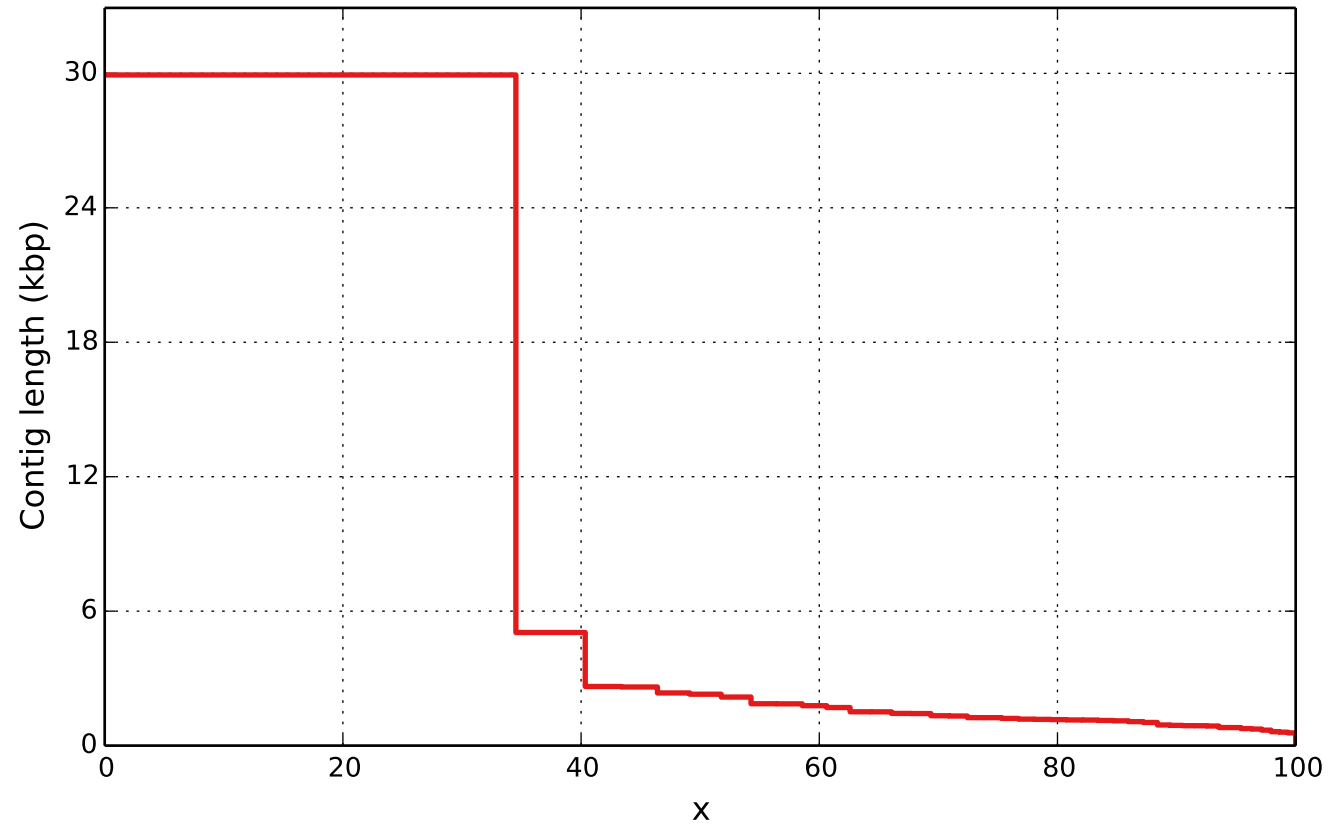

— CV18\_contigs

Supplement: Supplementary_File_2.zip [file Supplementary_File_2.zip]

NGx

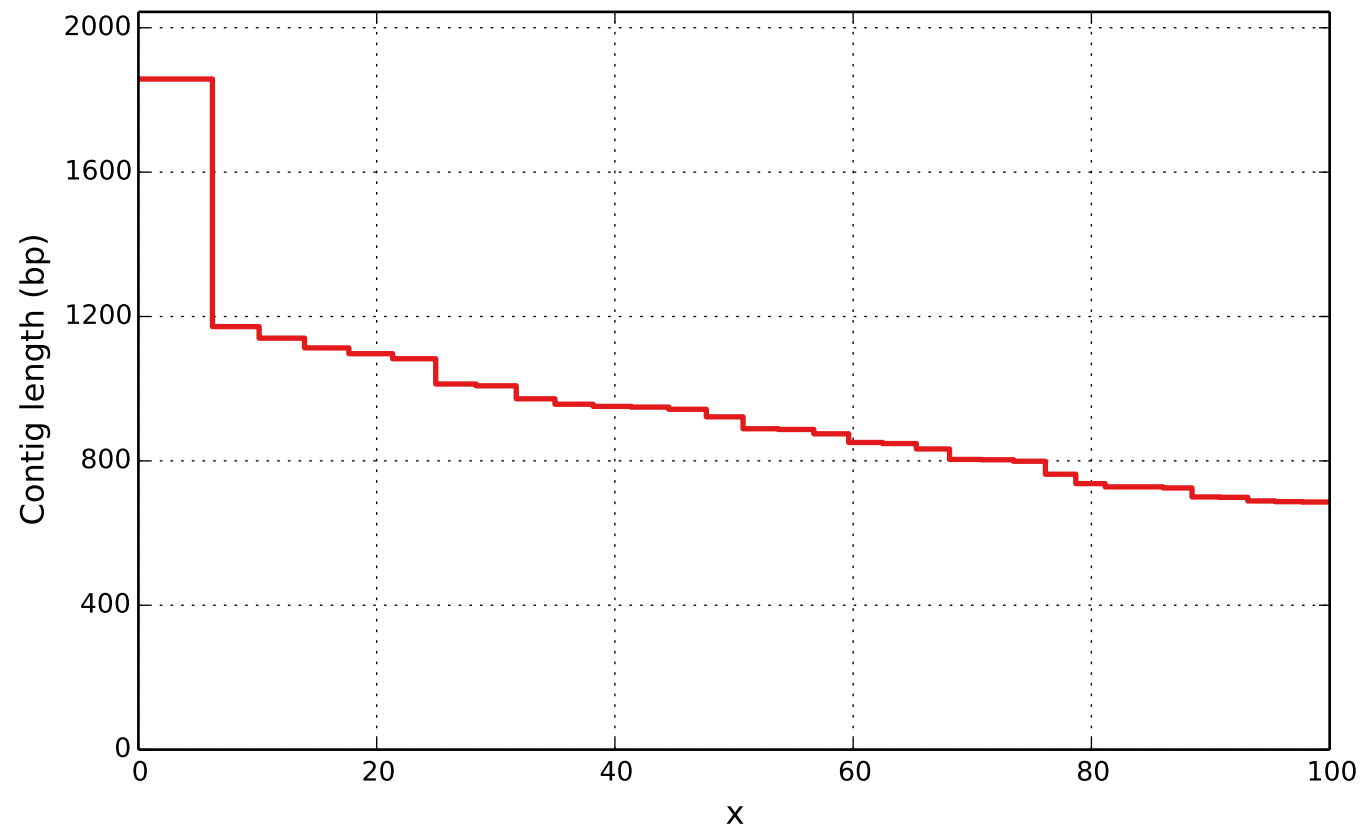

— CV18\_velvet\_contigs

Supplement: Supplementary_File_2.zip [file Supplementary_File_2.zip]

CV45\_contigs GC content

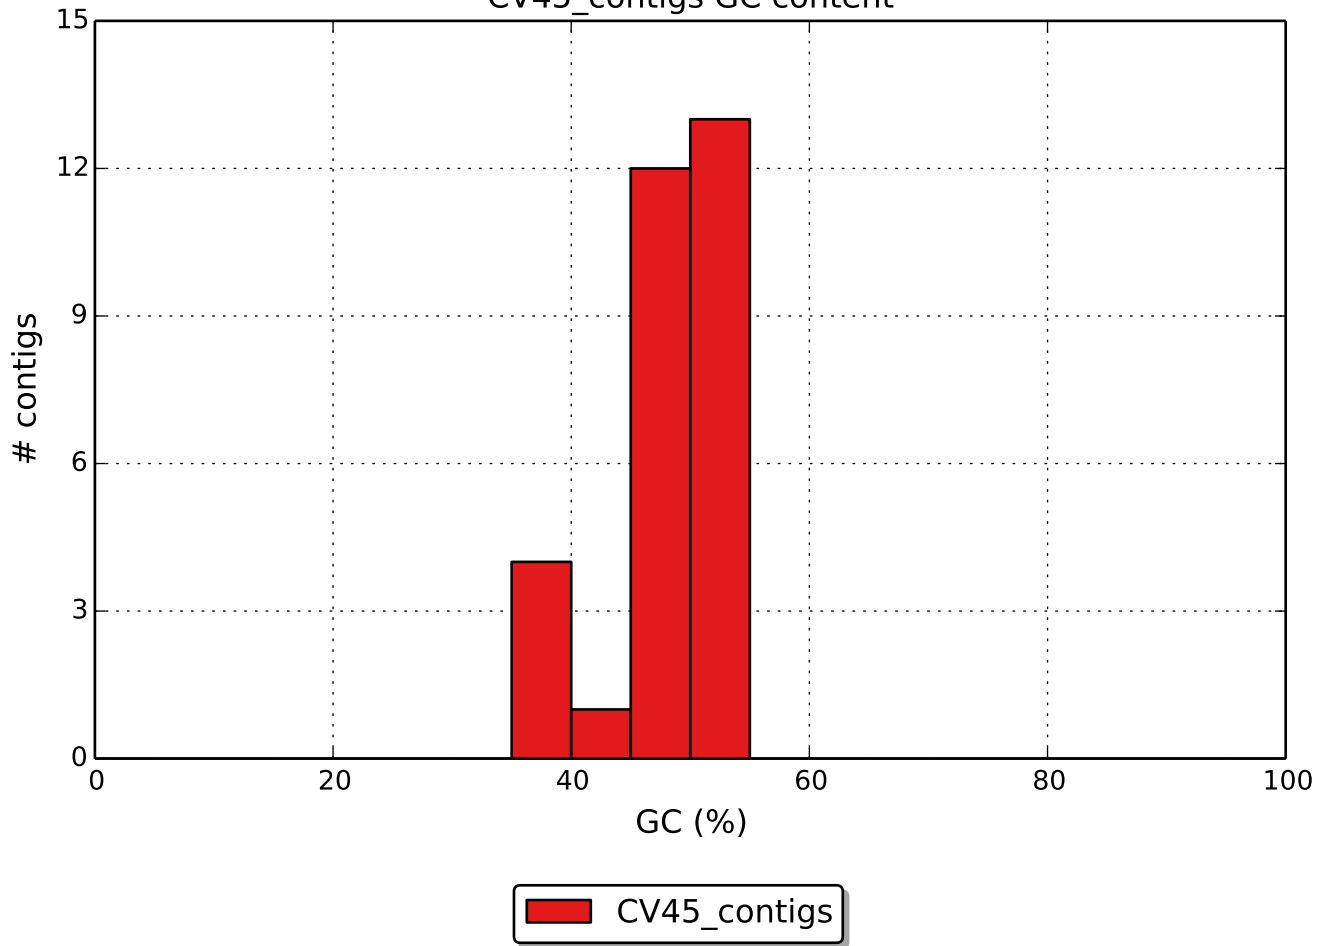

Supplement: Supplementary_File_2.zip [file Supplementary_File_2.zip]

NGx

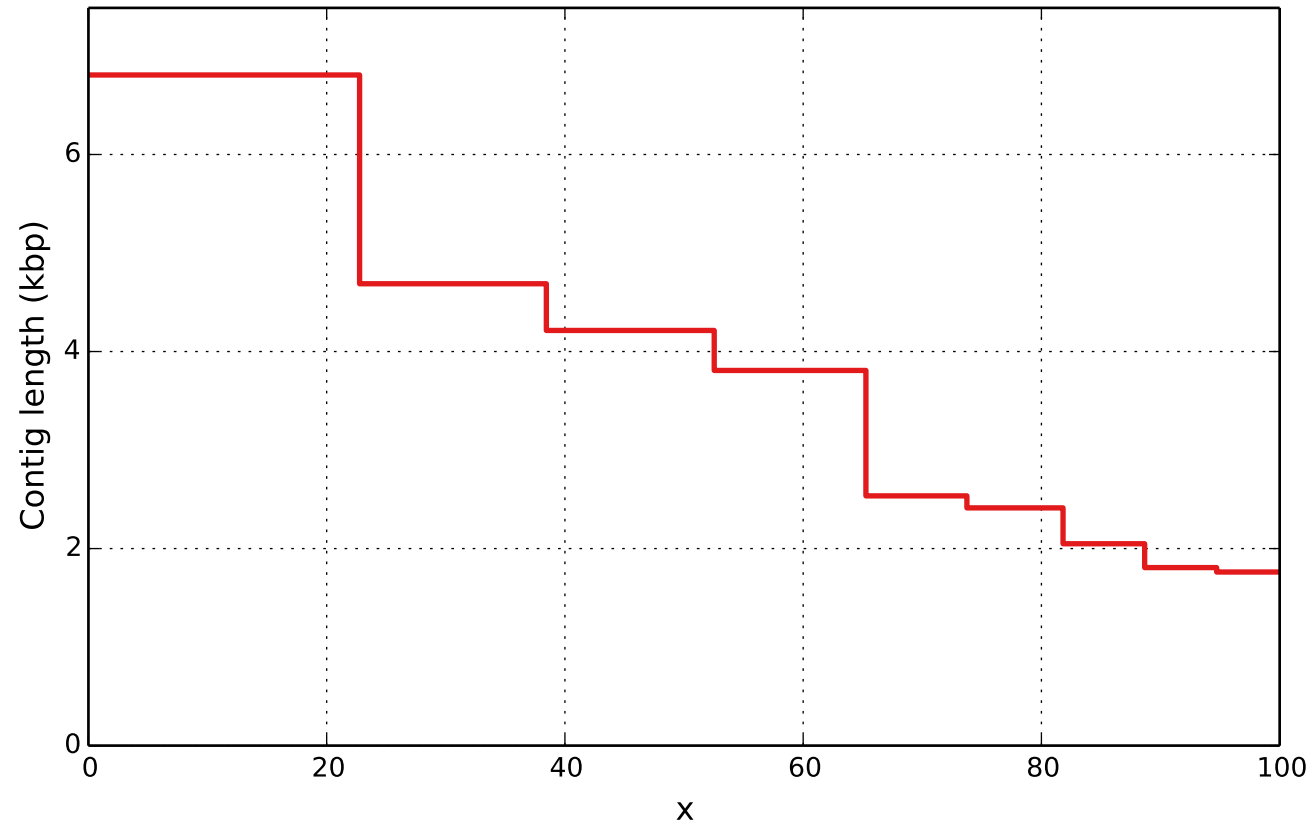

— CV145\_contigs

Supplement: Supplementary_File_2.zip [file Supplementary_File_2.zip]

Cumulative length (aligned contigs)

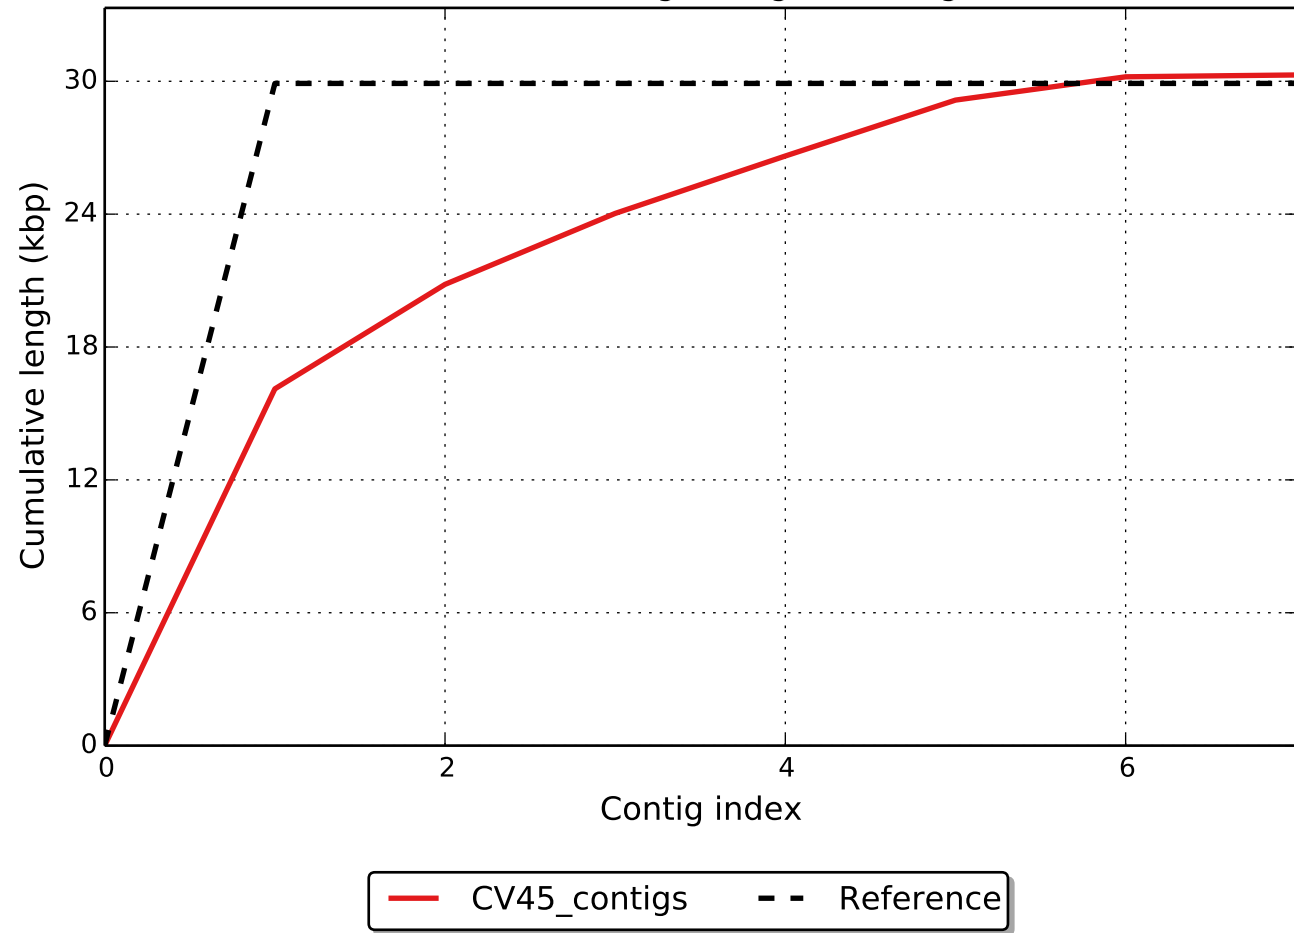

Supplement: Supplementary_File_2.zip [file Supplementary_File_2.zip]

# NGAx

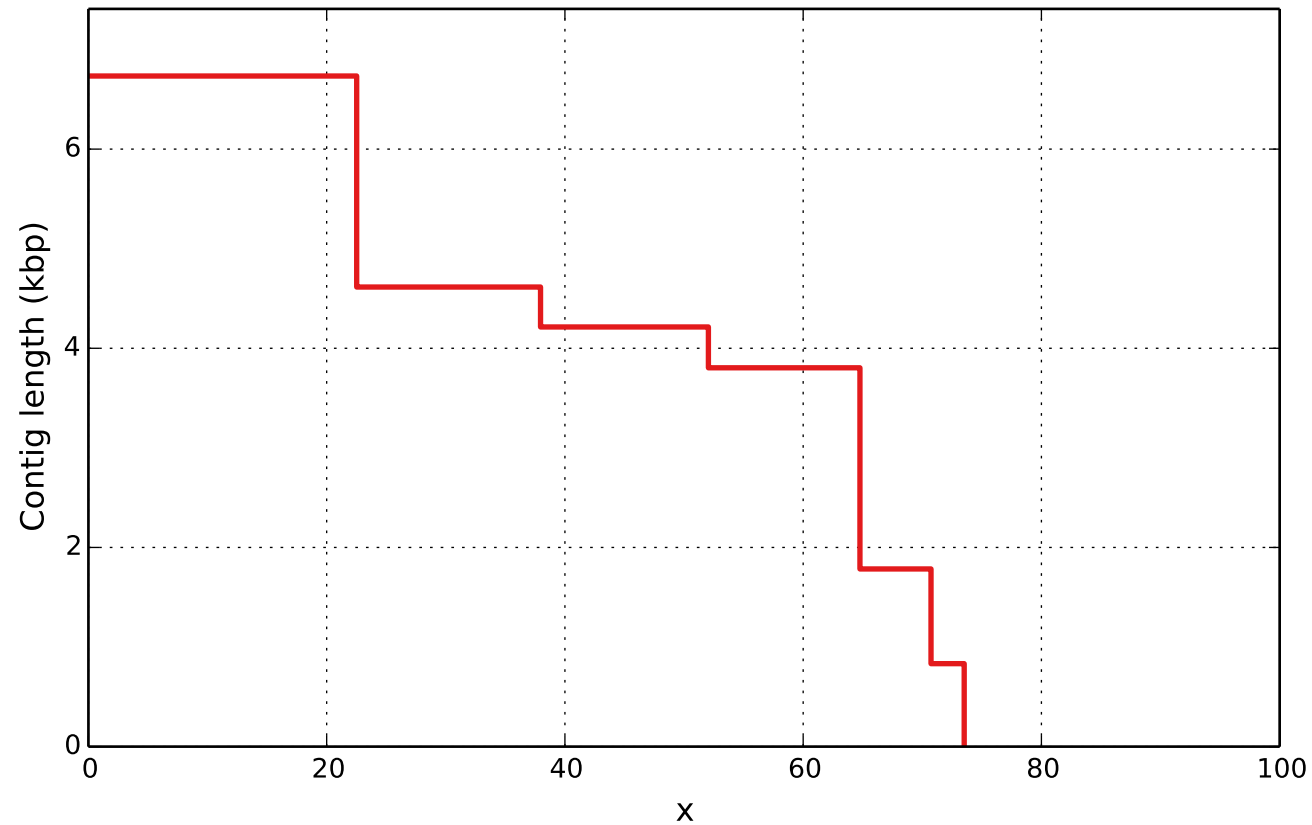

— CV145\_contigs

Supplement: Supplementary_File_2.zip [file Supplementary_File_2.zip]

Cumulative # complete genomic features

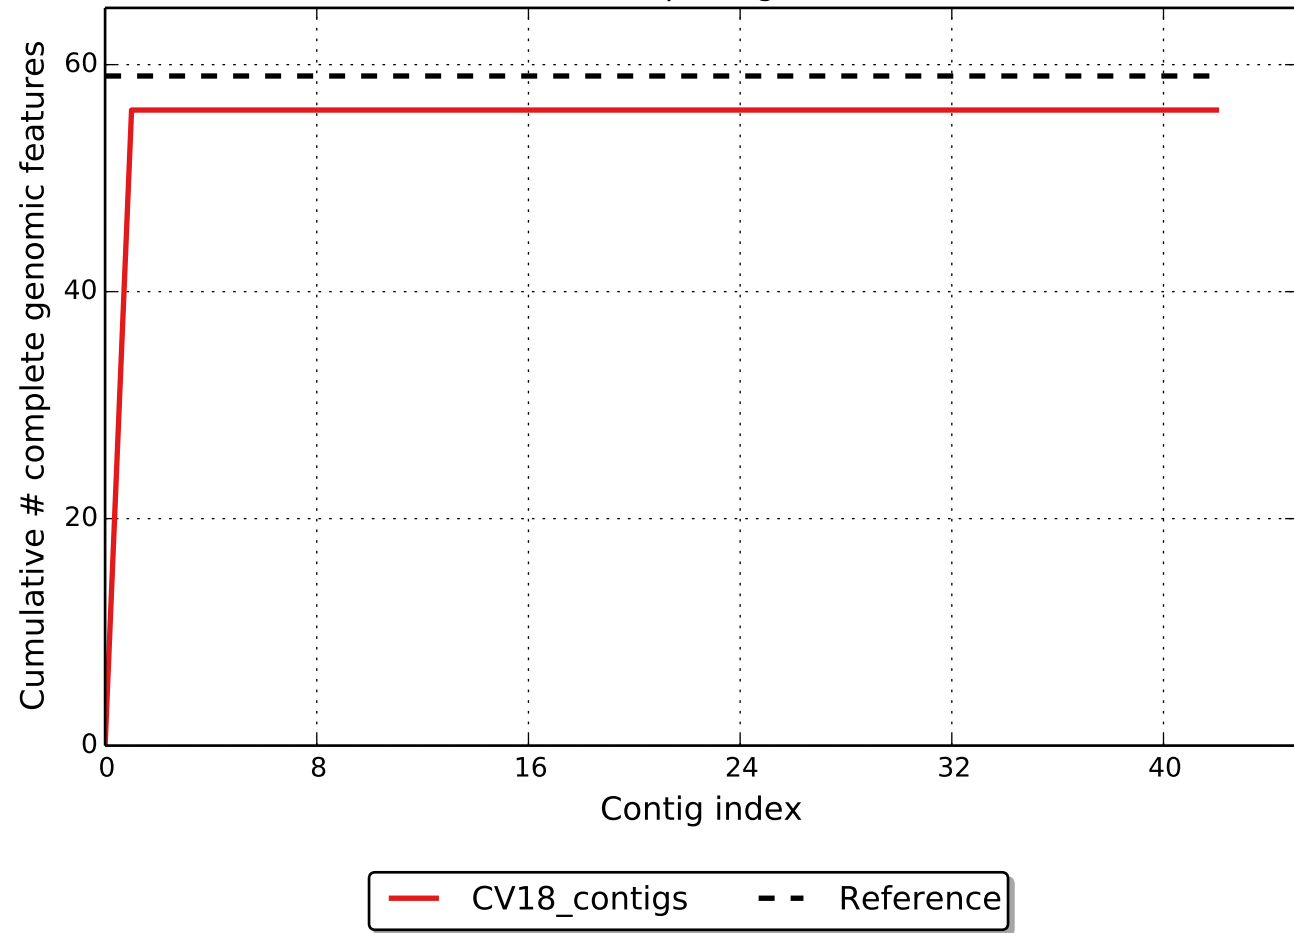

Supplement: Supplementary_File_2.zip [file Supplementary_File_2.zip]

Cumulative length

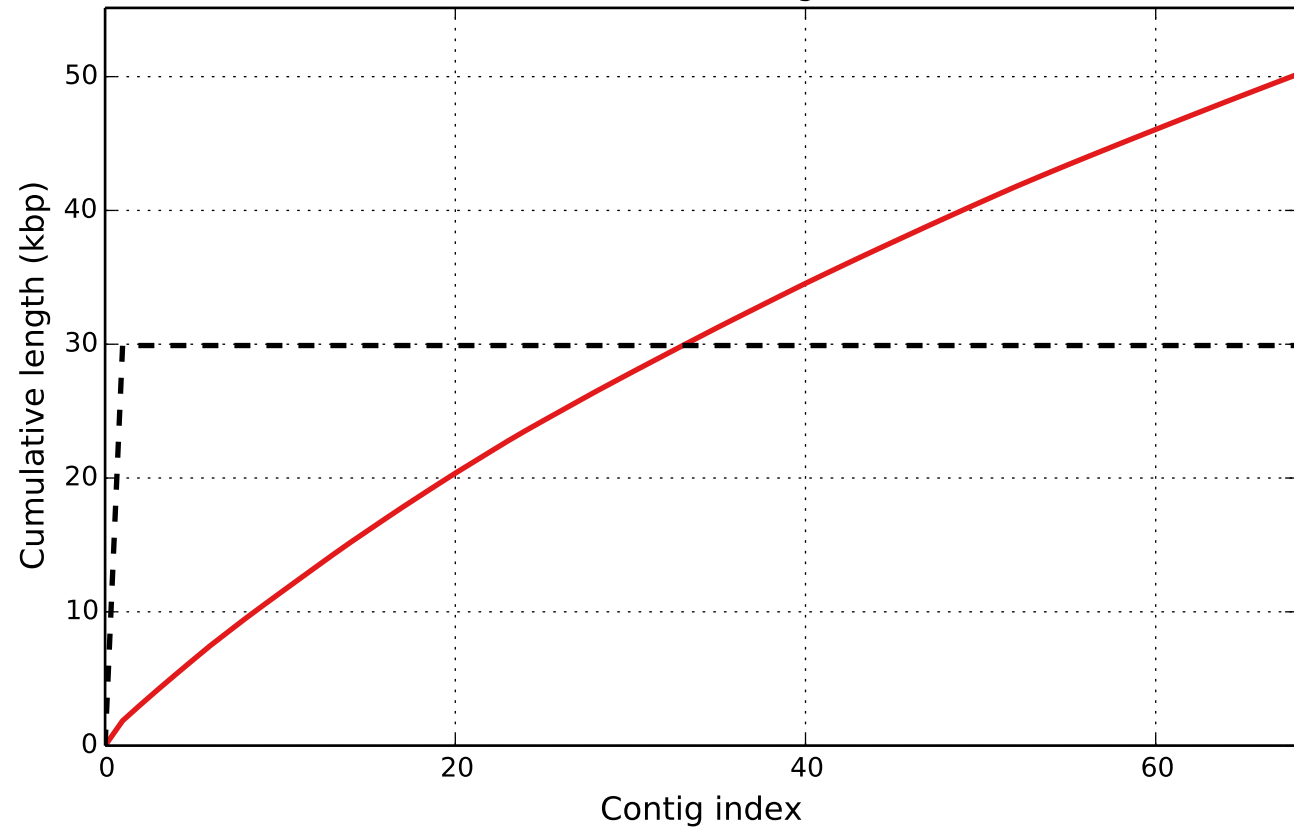

— CV18\_velvet\_contigs    - - Reference

Supplement: Supplementary_File_2.zip [file Supplementary_File_2.zip]

NGAx

Contig length (kbp)

25

20

15

10

5

0

0

20

40

60

80

100

x

CV29\_spades\_contigs

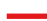

Supplement: Supplementary_File_2.zip [file Supplementary_File_2.zip]

FRCurve (misassemblies)

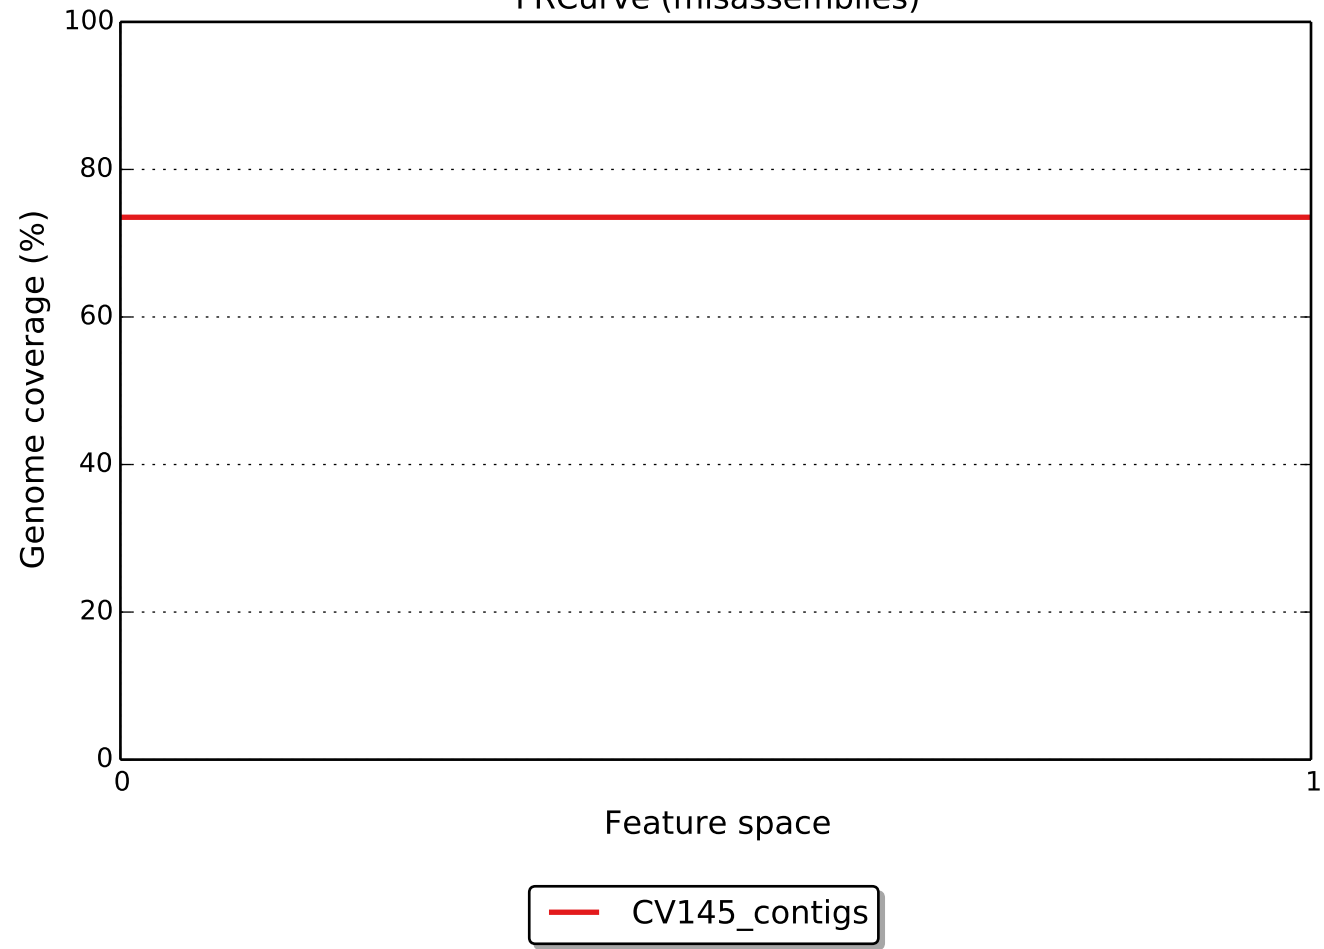

Supplement: Supplementary_File_2.zip [file Supplementary_File_2.zip]

NAX

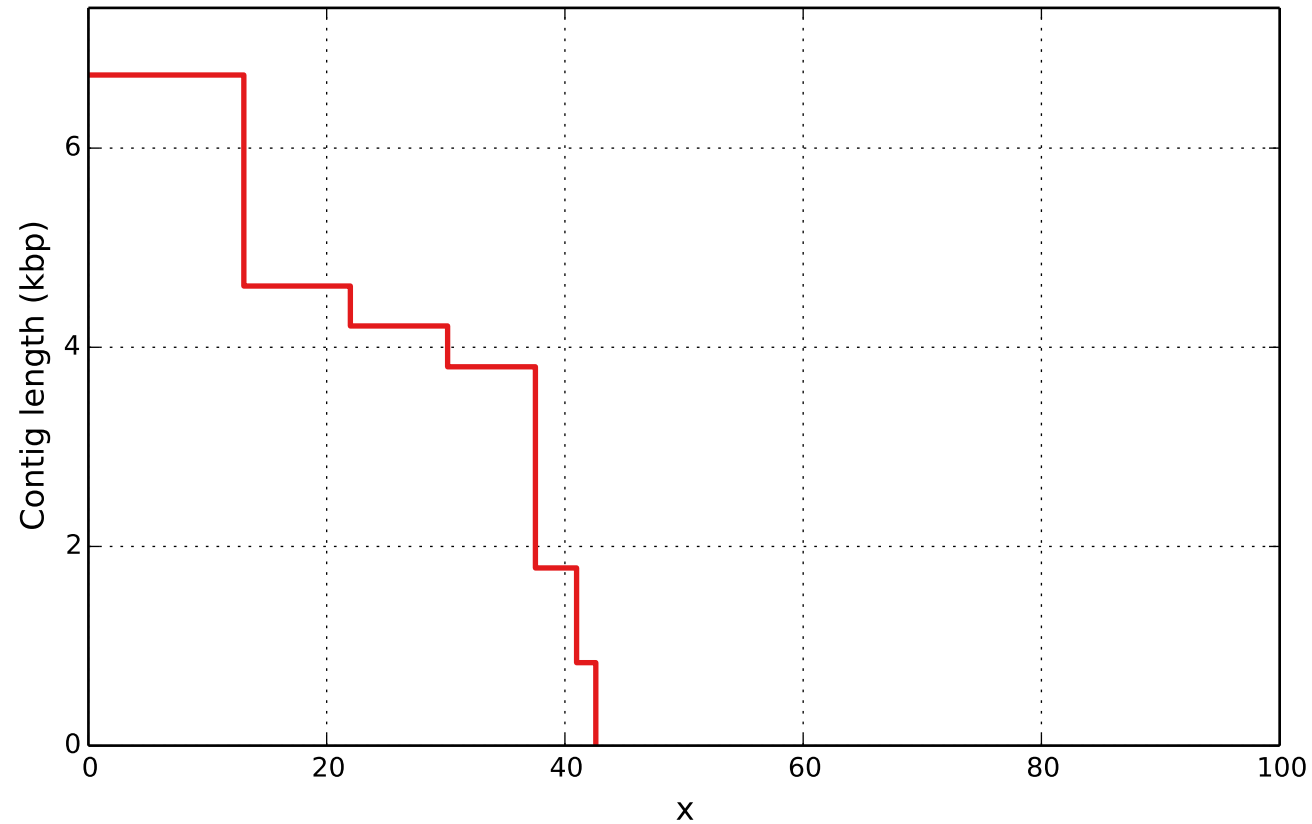

— CV145\_contigs

Supplement: Supplementary_File_2.zip [file Supplementary_File_2.zip]

CV29\_velvet\_contigs GC content

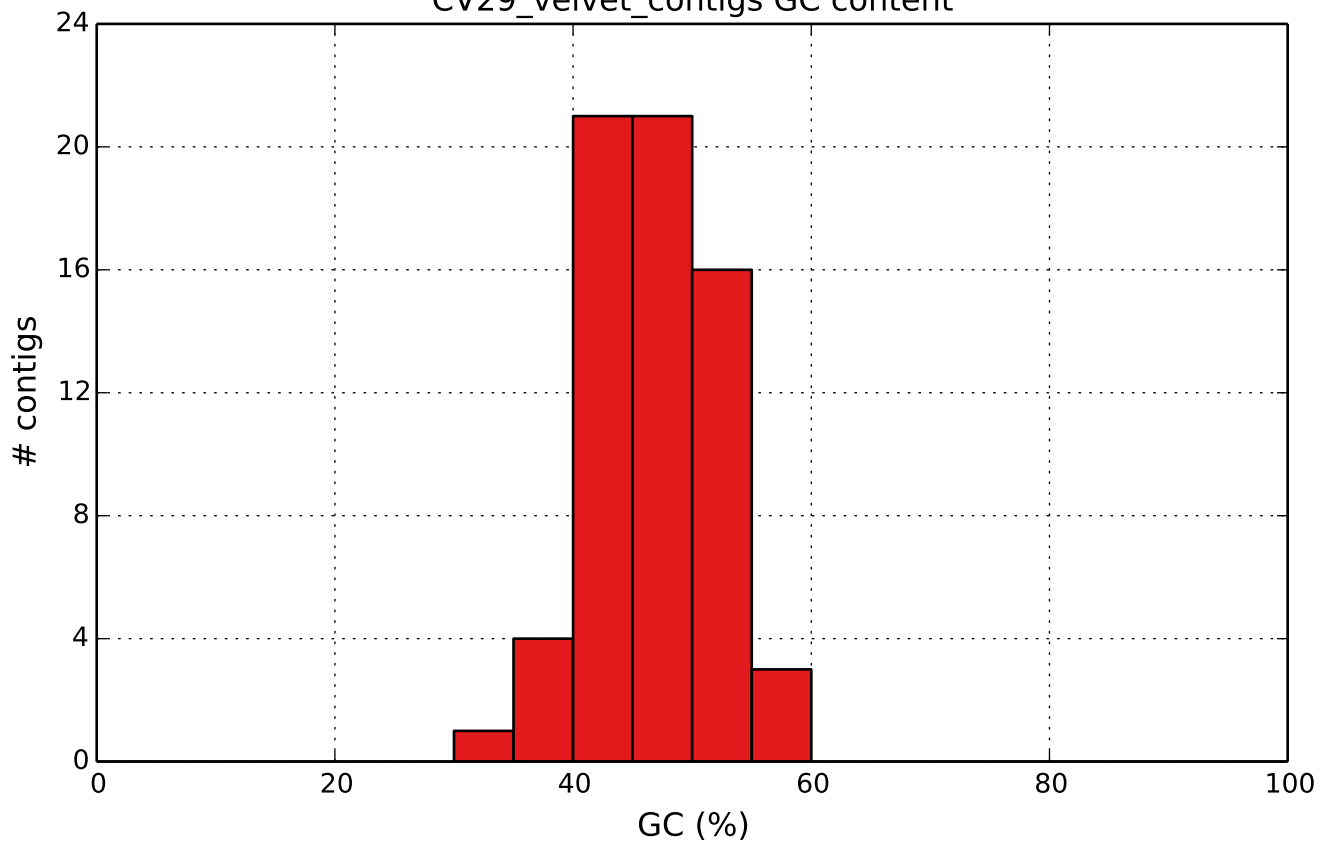

CV29\_velvet\_contigs

Supplement: Supplementary_File_2.zip [file Supplementary_File_2.zip]

FRCurve (misassemblies)

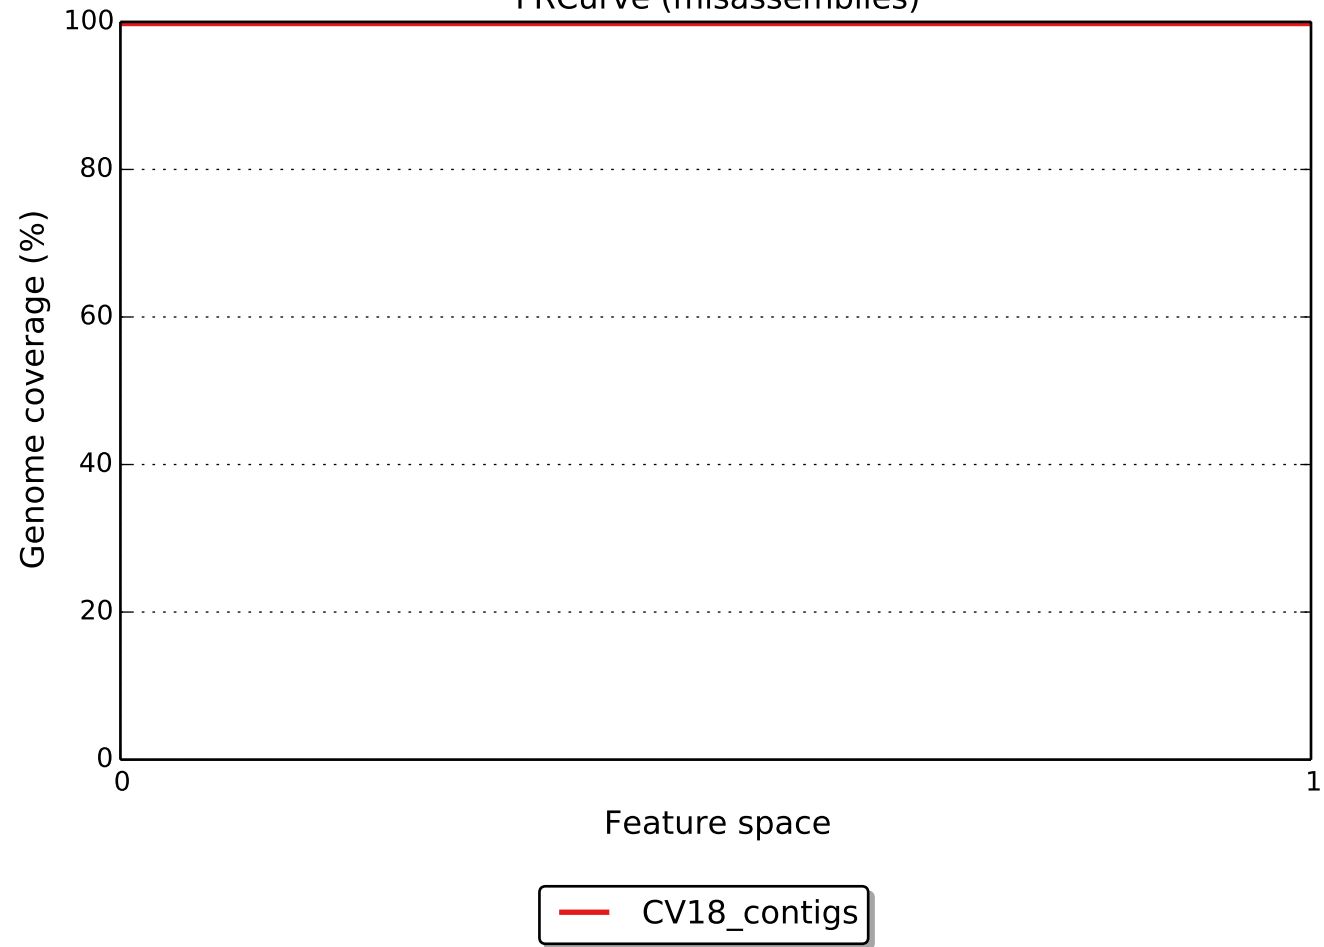

Supplement: Supplementary_File_2.zip [file Supplementary_File_2.zip]

NAX

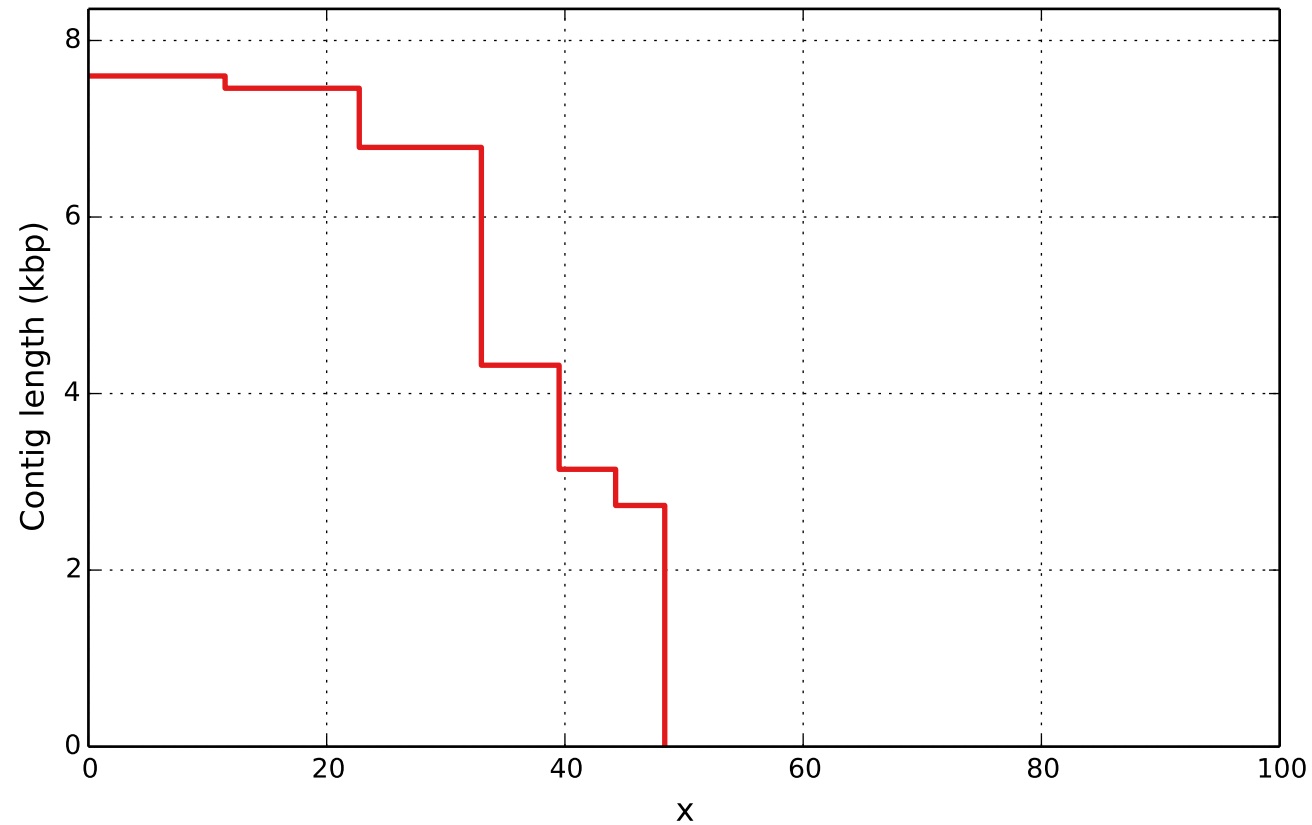

— CV29\_contigs

Supplement: Supplementary_File_2.zip [file Supplementary_File_2.zip]

GC content

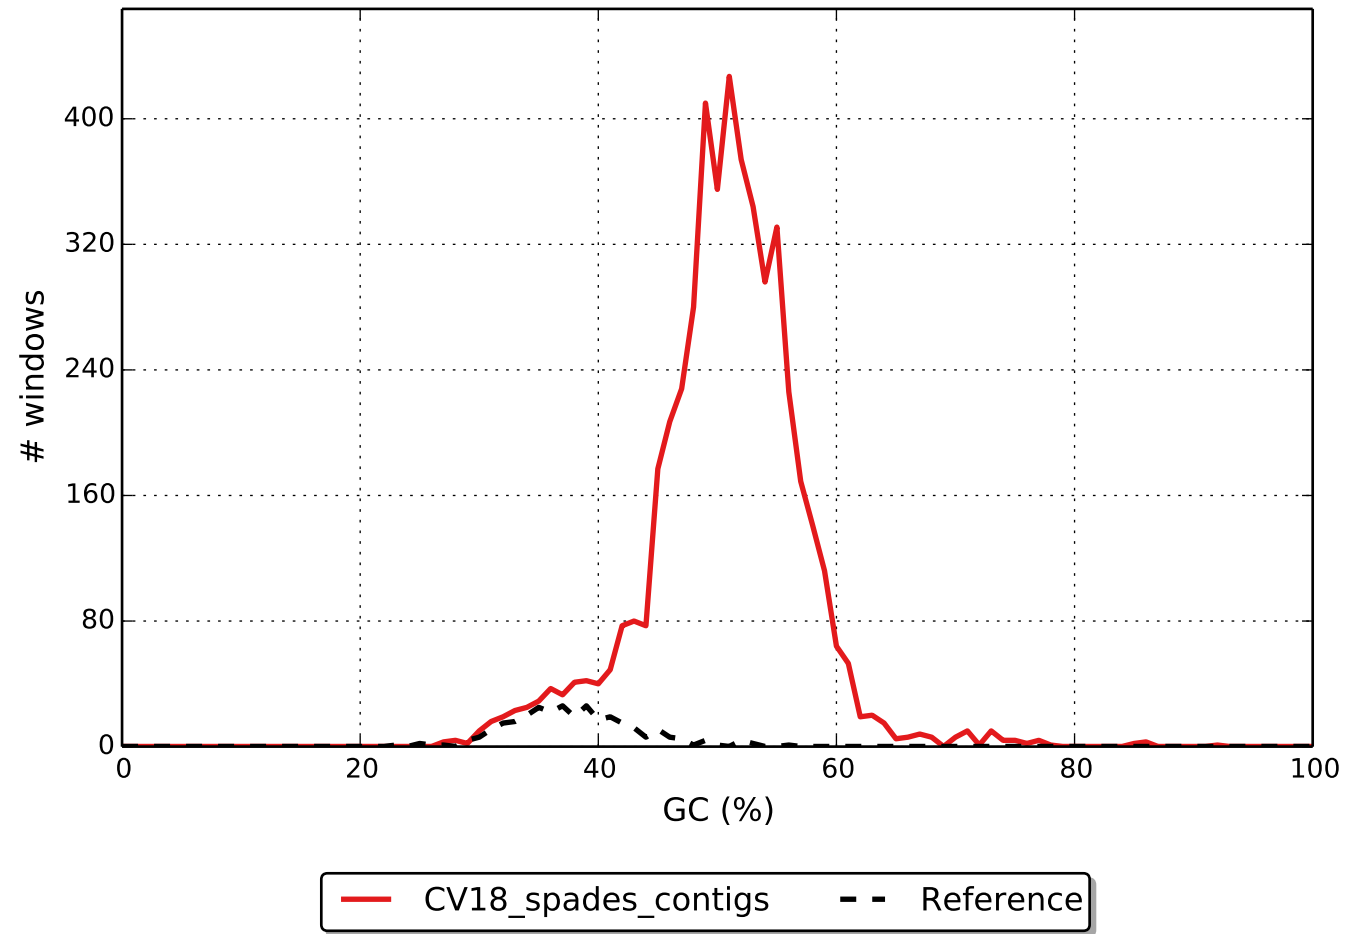

Supplement: Supplementary_File_2.zip [file Supplementary_File_2.zip]

CV145\_contigs GC content

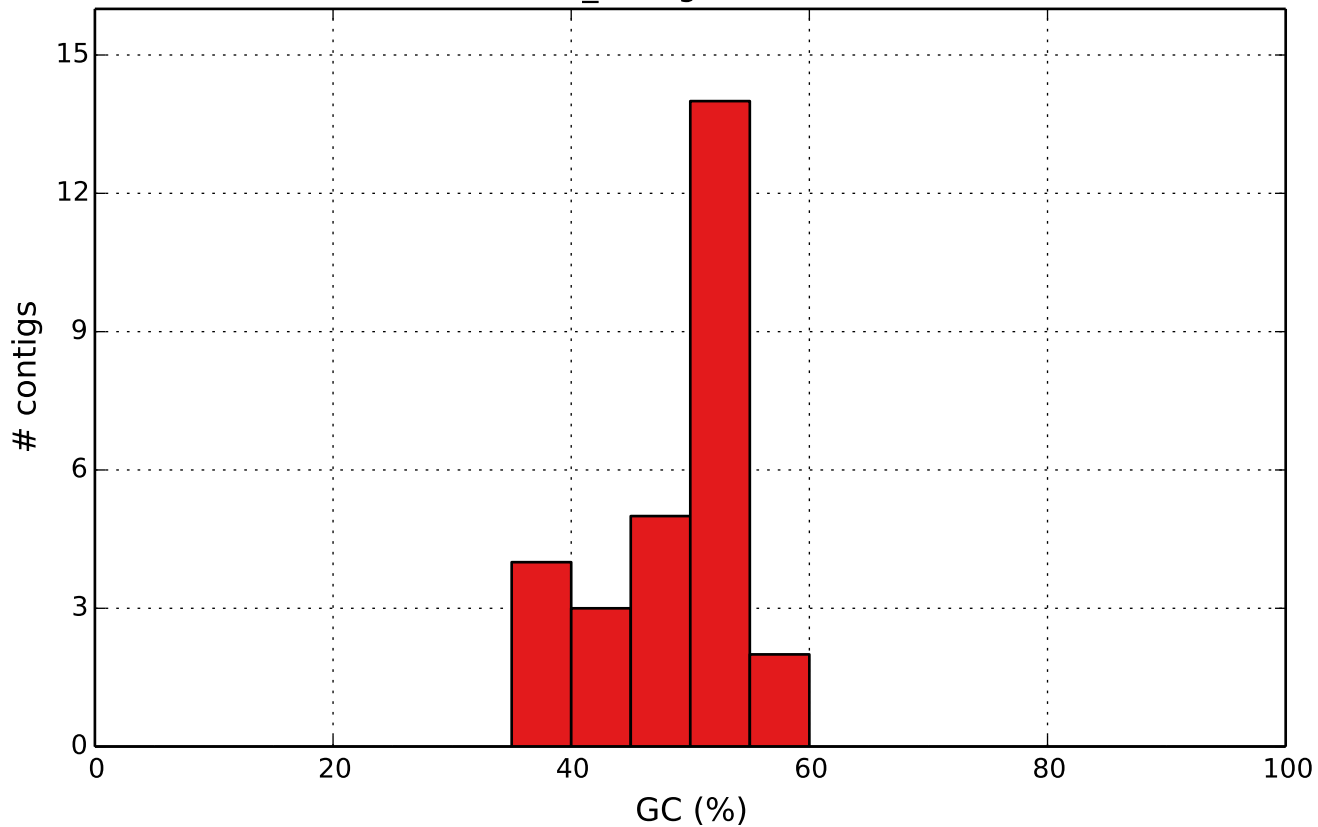

CV145\_contigs

Supplement: Supplementary_File_2.zip [file Supplementary_File_2.zip]

FRCurve (genomic features)

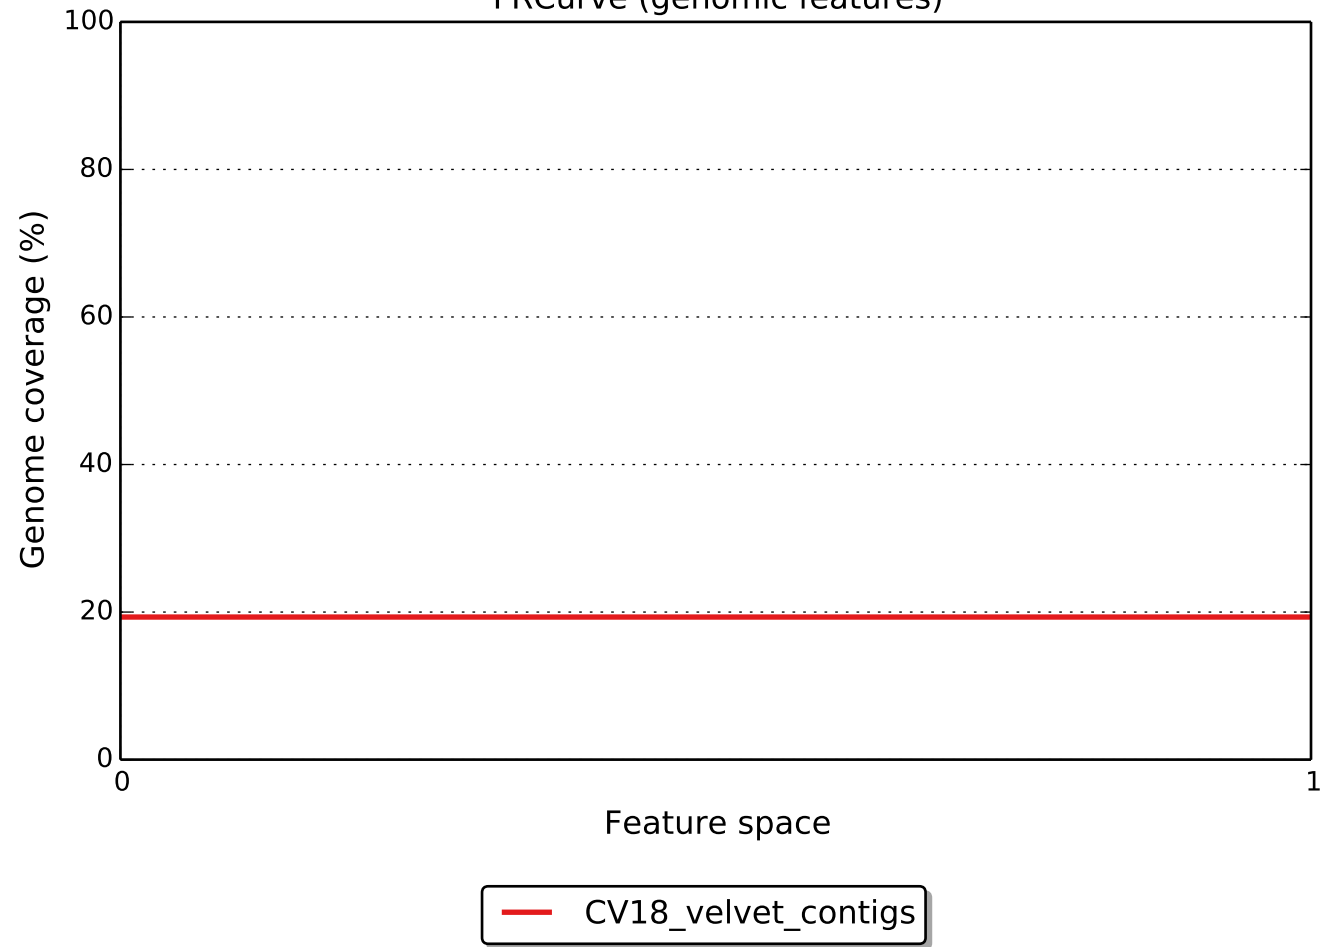

Supplement: Supplementary_File_2.zip [file Supplementary_File_2.zip]

Cumulative length

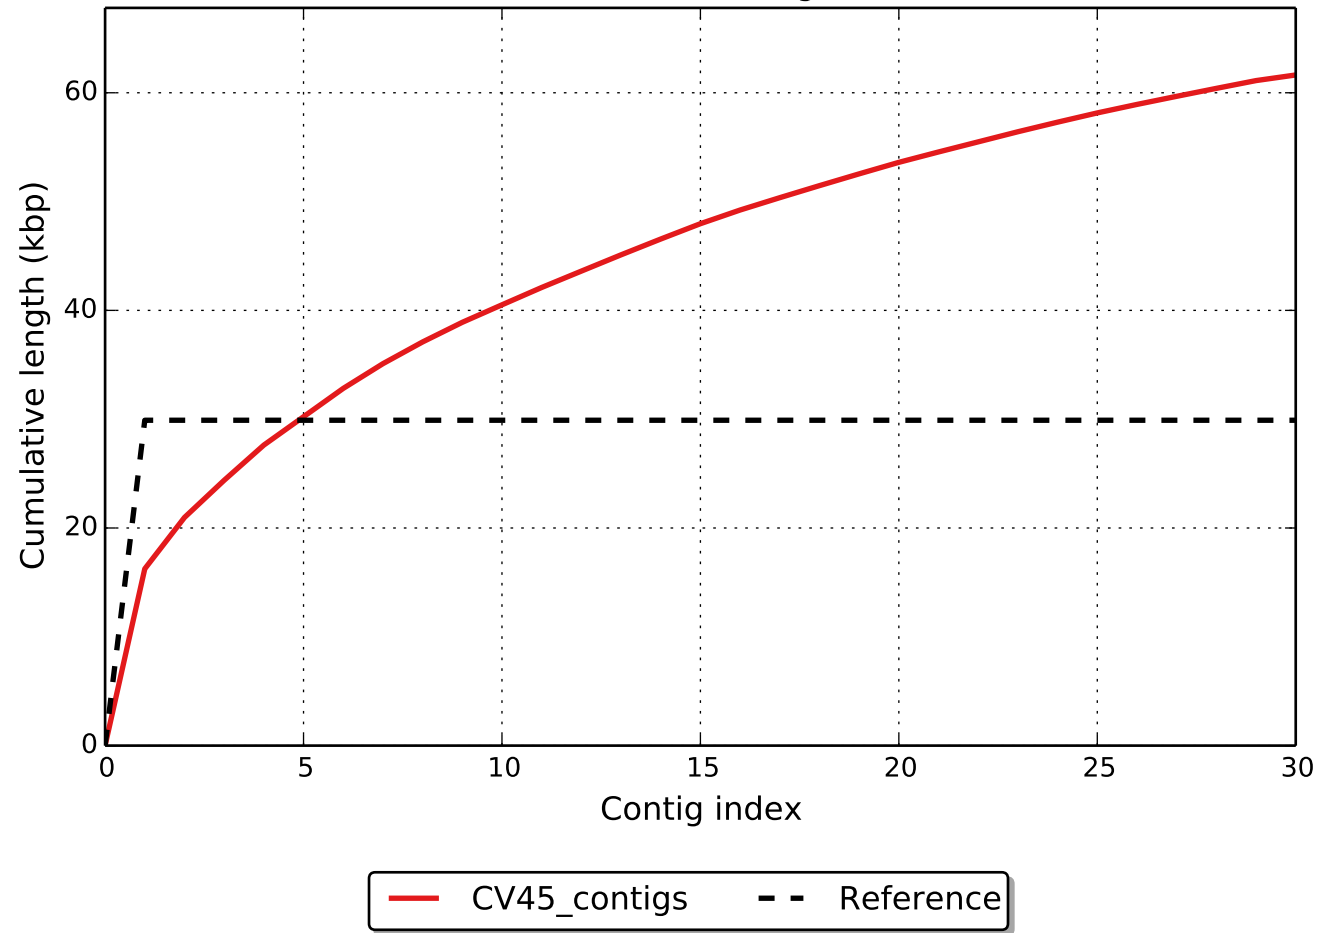

Supplement: Supplementary_File_2.zip [file Supplementary_File_2.zip]

Cumulative length (aligned contigs)

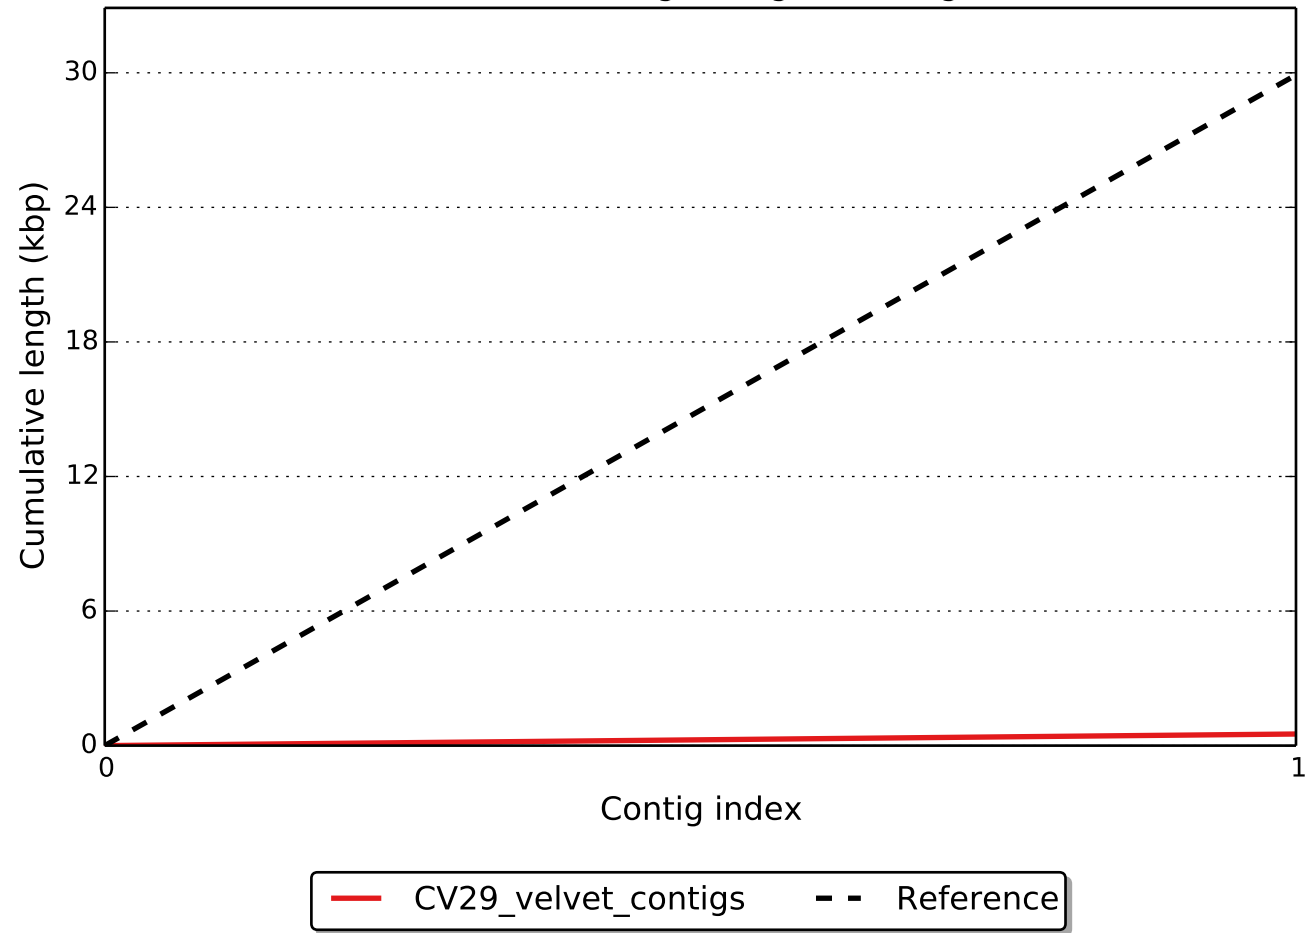

Supplement: Supplementary_File_2.zip [file Supplementary_File_2.zip]

# GC content

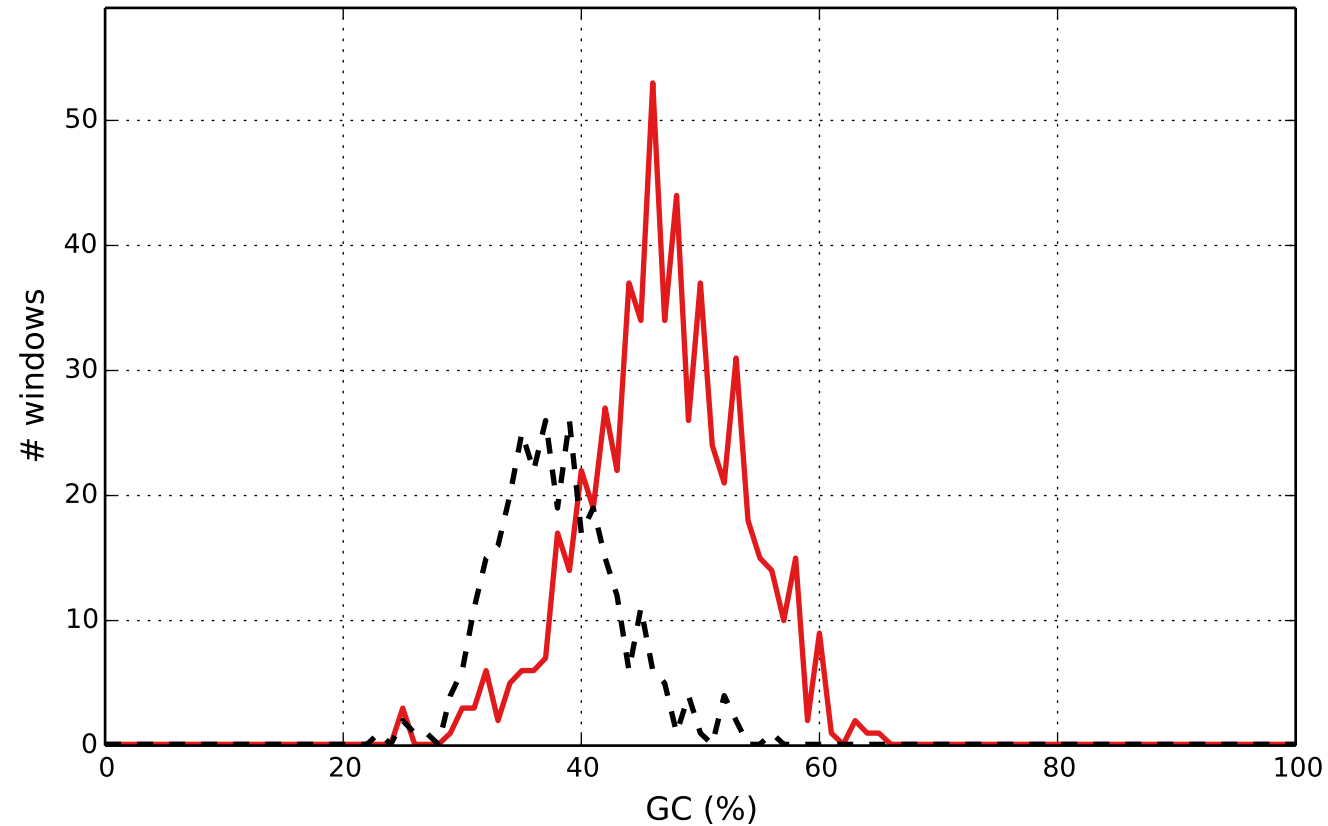

— CV29\_velvet\_contigs    - - Reference

Supplement: Supplementary_File_2.zip [file Supplementary_File_2.zip]

NAX

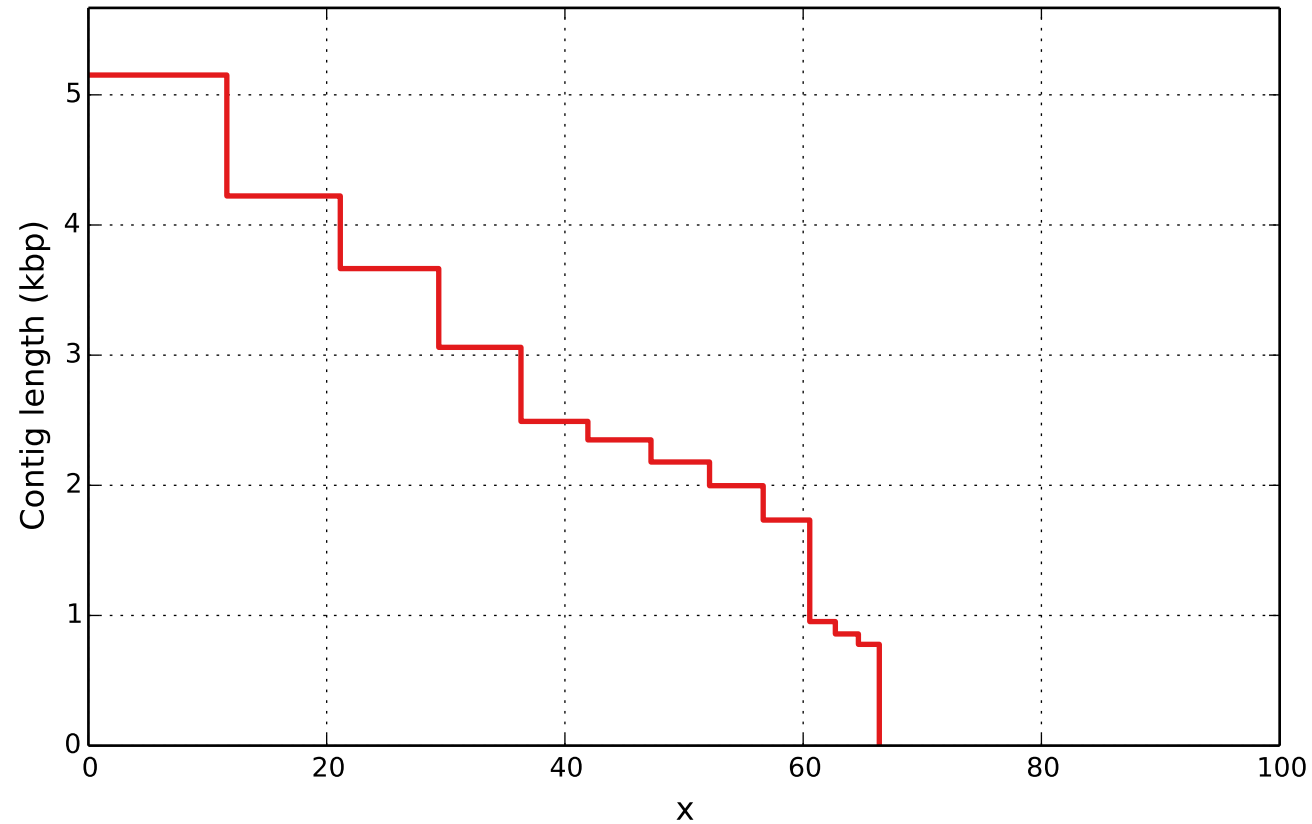

— CV115\_contigs

Supplement: Supplementary_File_2.zip [file Supplementary_File_2.zip]

Nx

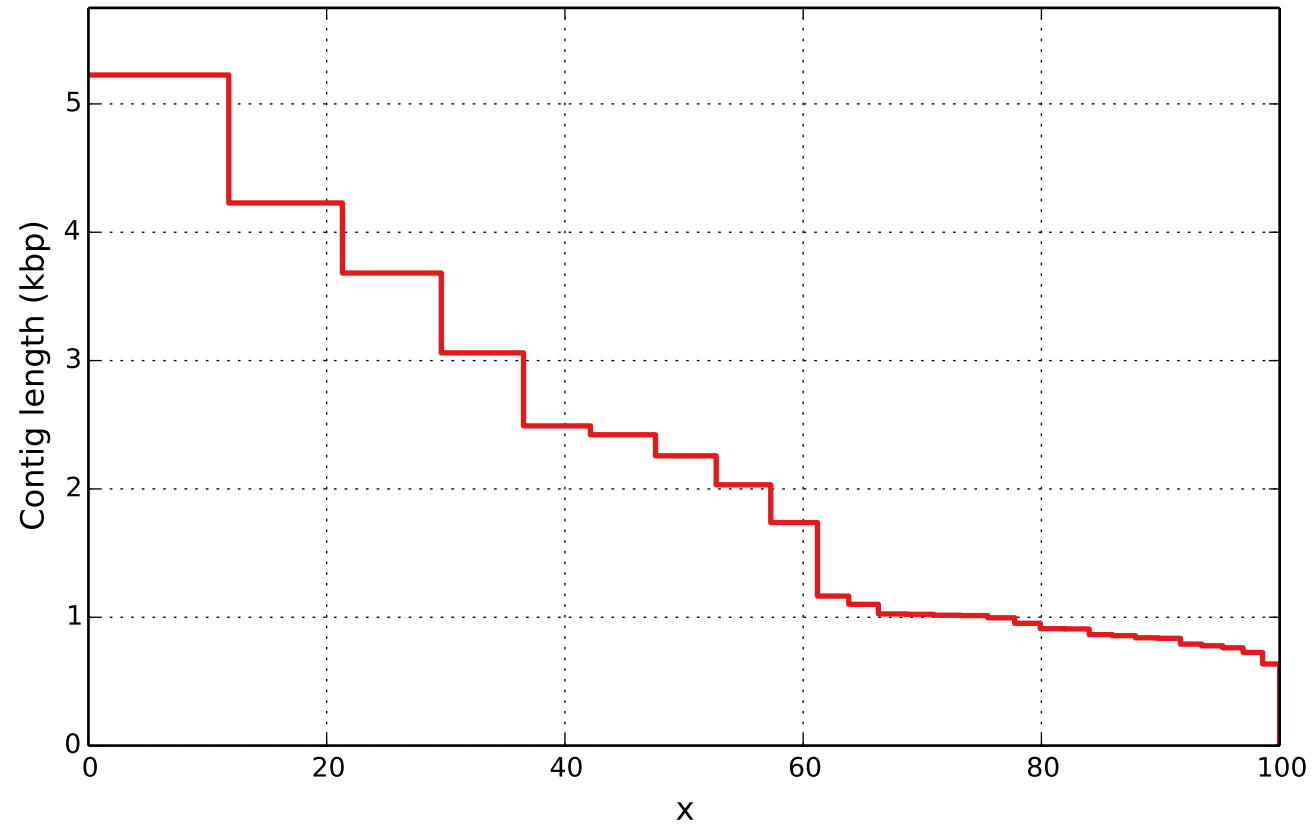

CV115\_contigs

Supplement: Supplementary_File_2.zip [file Supplementary_File_2.zip]

NGAx

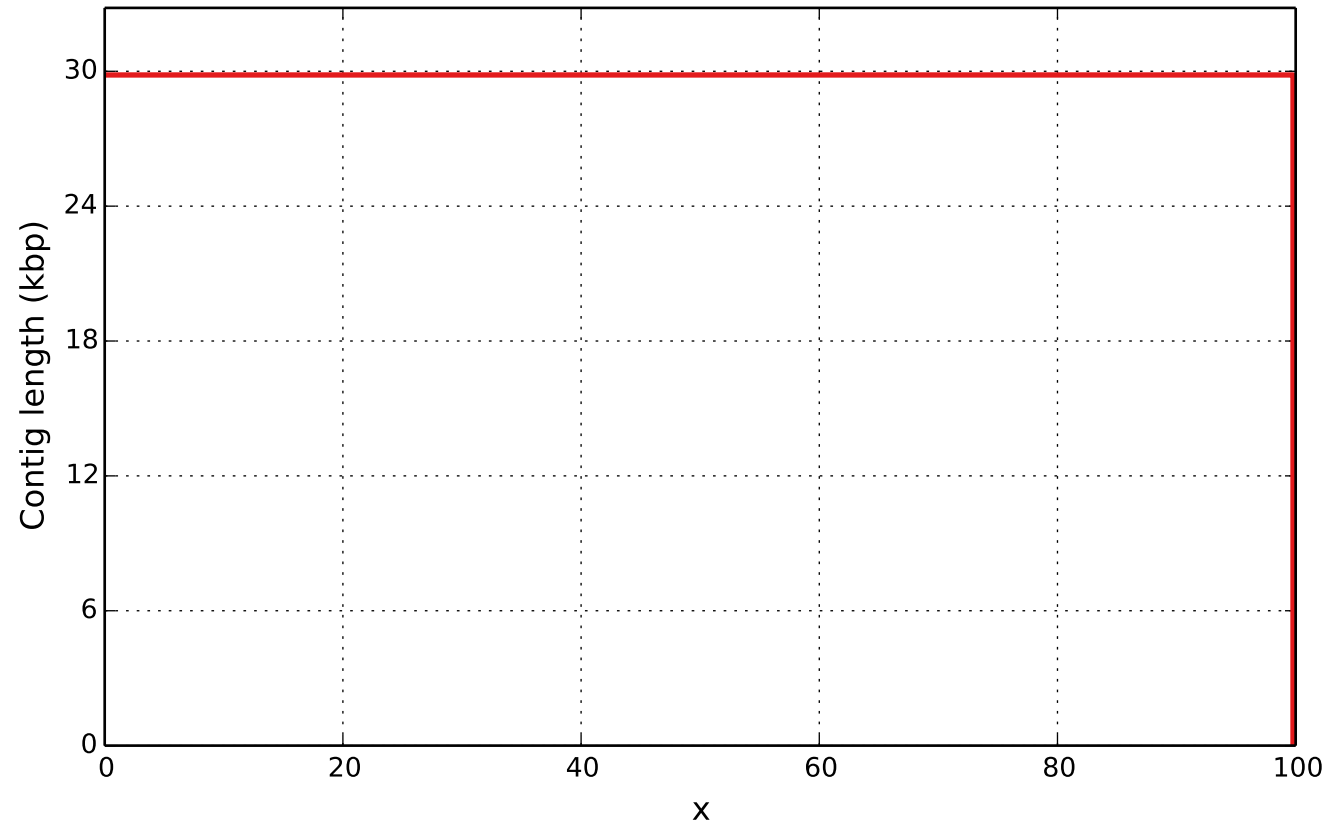

— CV18\_contigs

Supplement: Supplementary_File_2.zip [file Supplementary_File_2.zip]

NGx

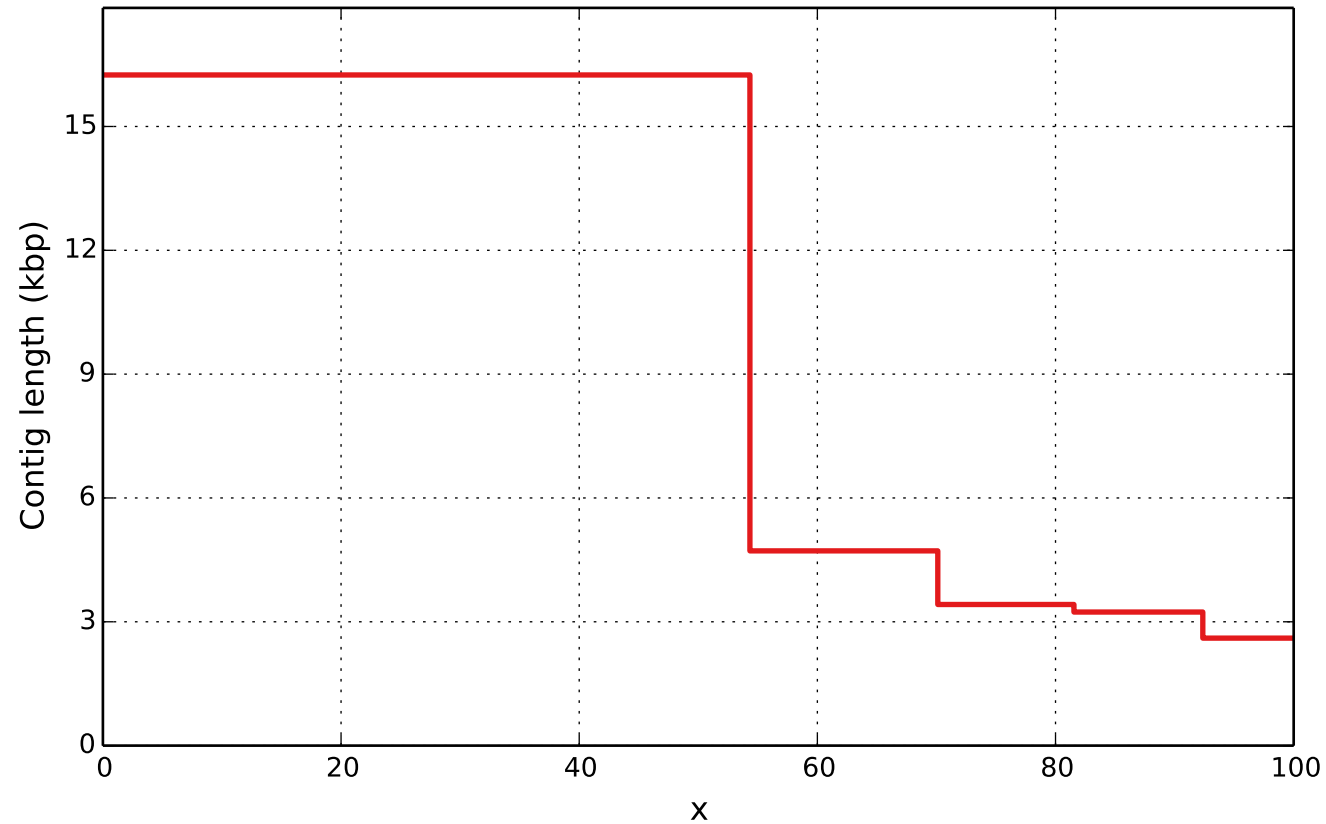

— CV45\_contigs

Supplement: Supplementary_File_2.zip [file Supplementary_File_2.zip]

CV18\_velvet\_contigs GC content

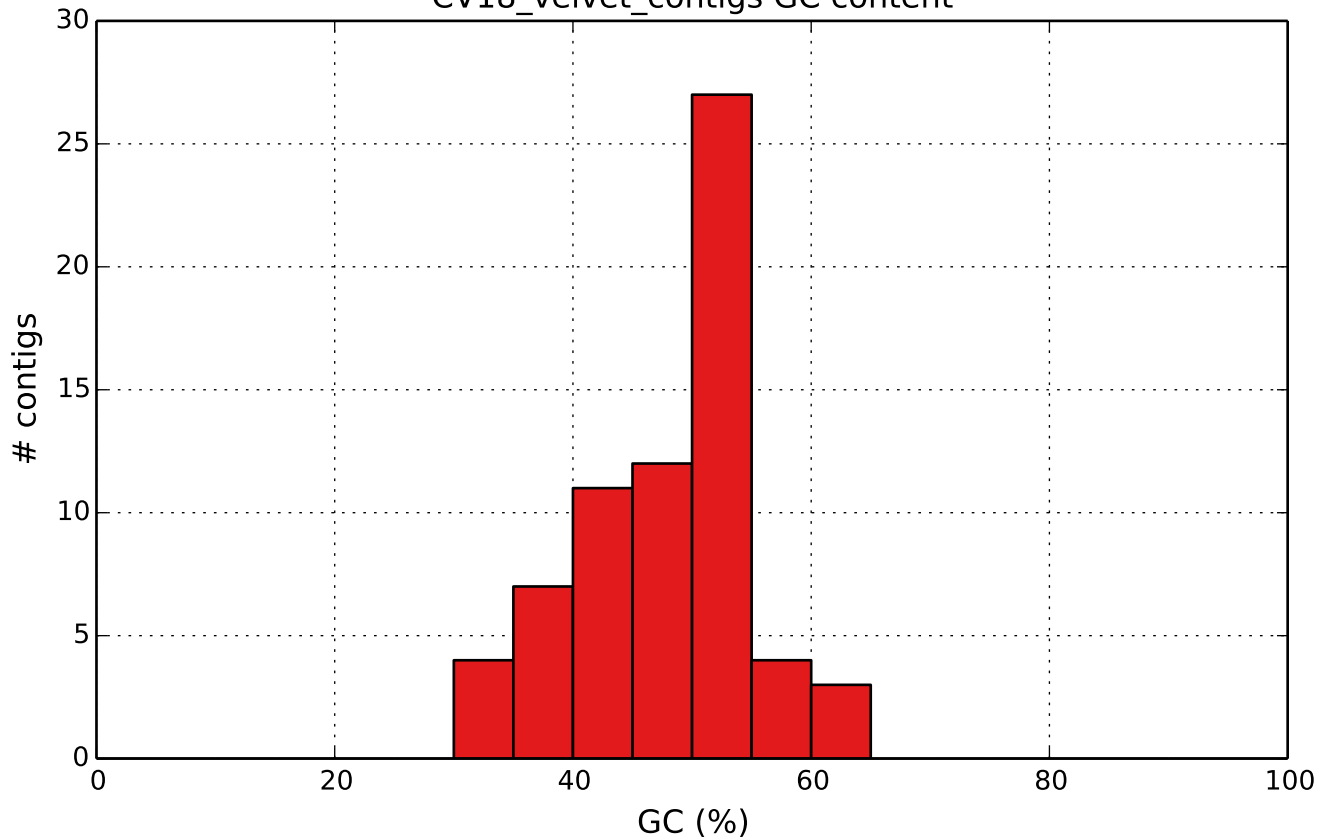

CV18\_velvet\_contigs

Supplement: Supplementary_File_2.zip [file Supplementary_File_2.zip]

Cumulative # complete genomic features

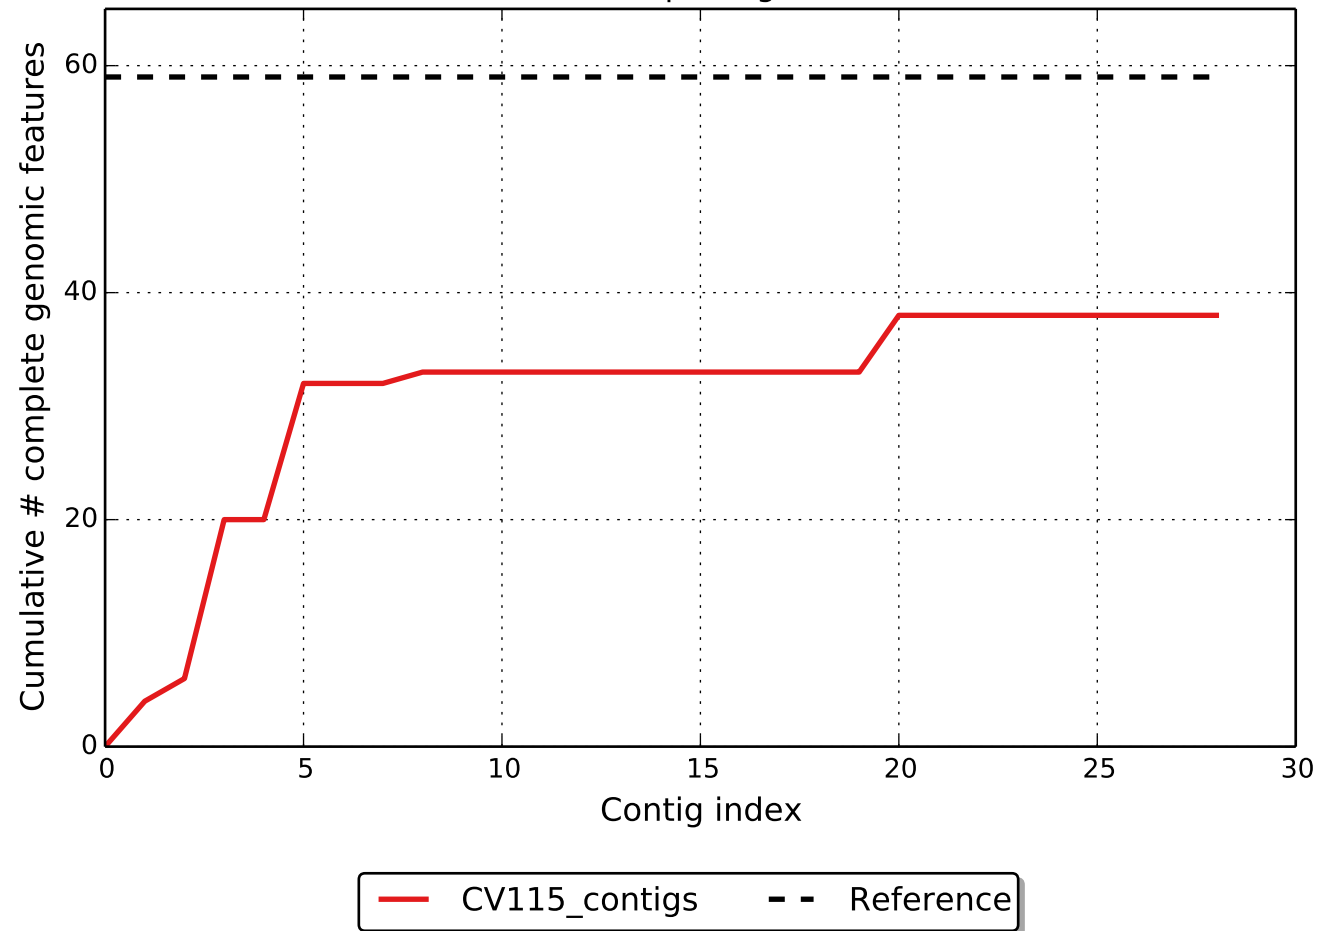

Supplement: Supplementary_File_2.zip [file Supplementary_File_2.zip]

GC content

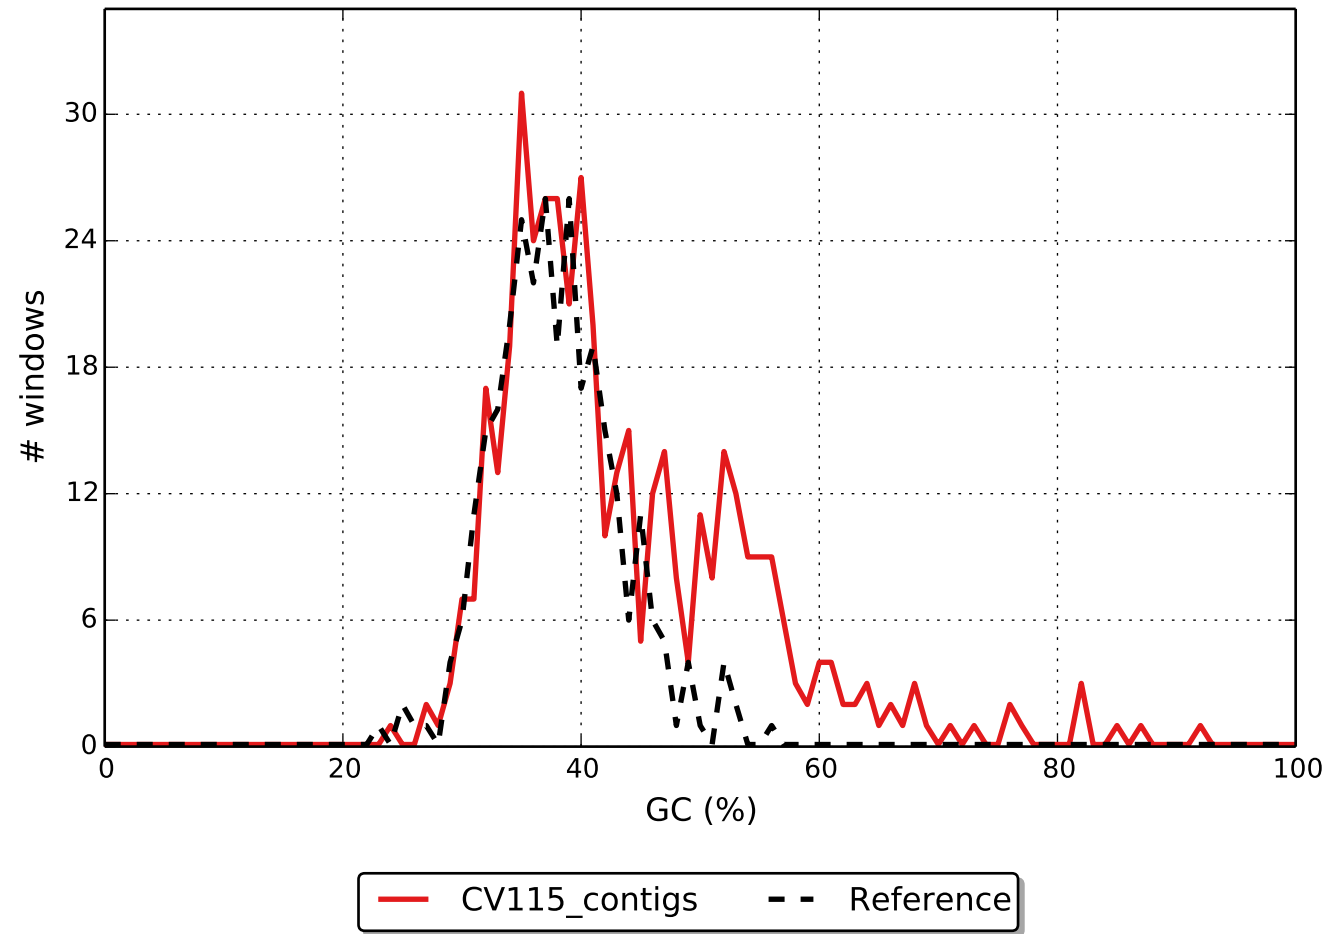

Supplement: Supplementary_File_2.zip [file Supplementary_File_2.zip]

Nx

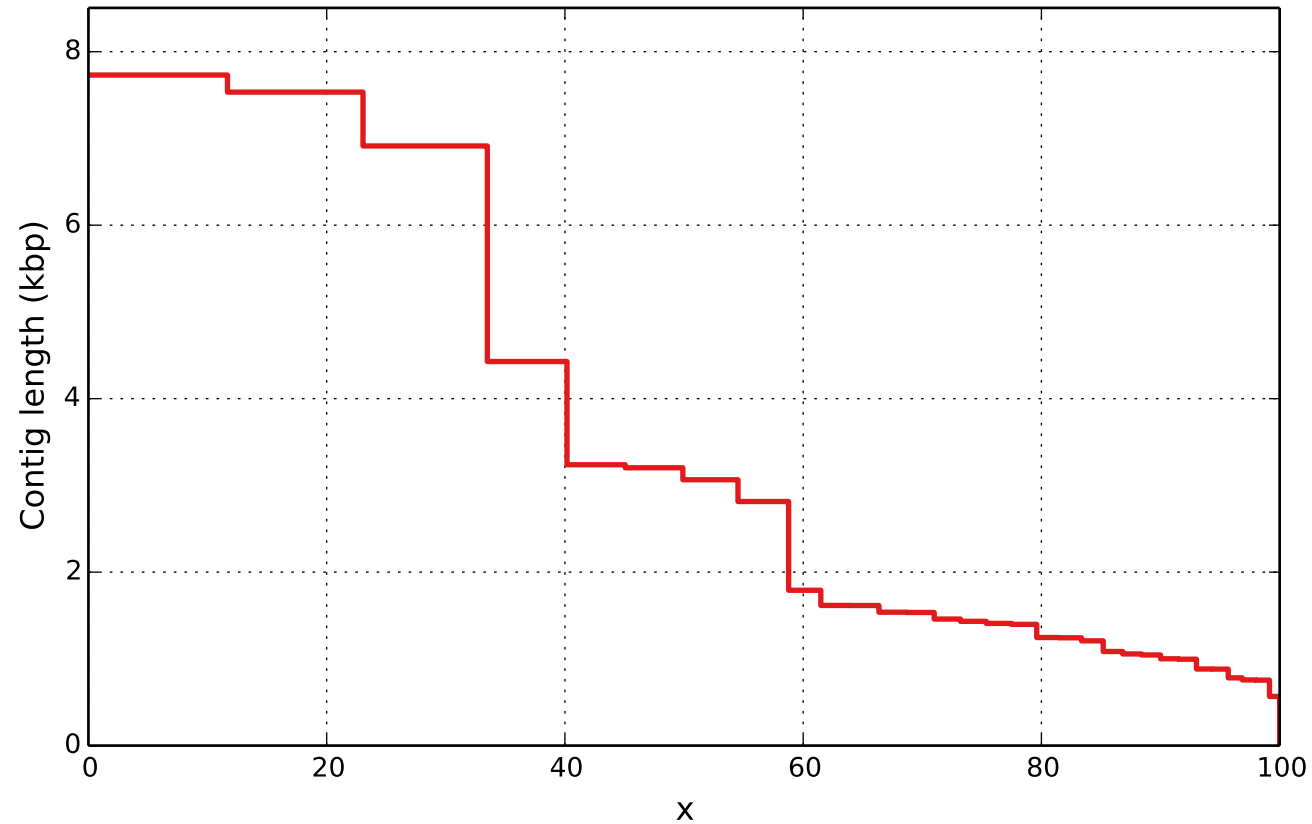

CV29\_contigs

Supplement: Supplementary_File_2.zip [file Supplementary_File_2.zip]

FRCurve (genomic features)

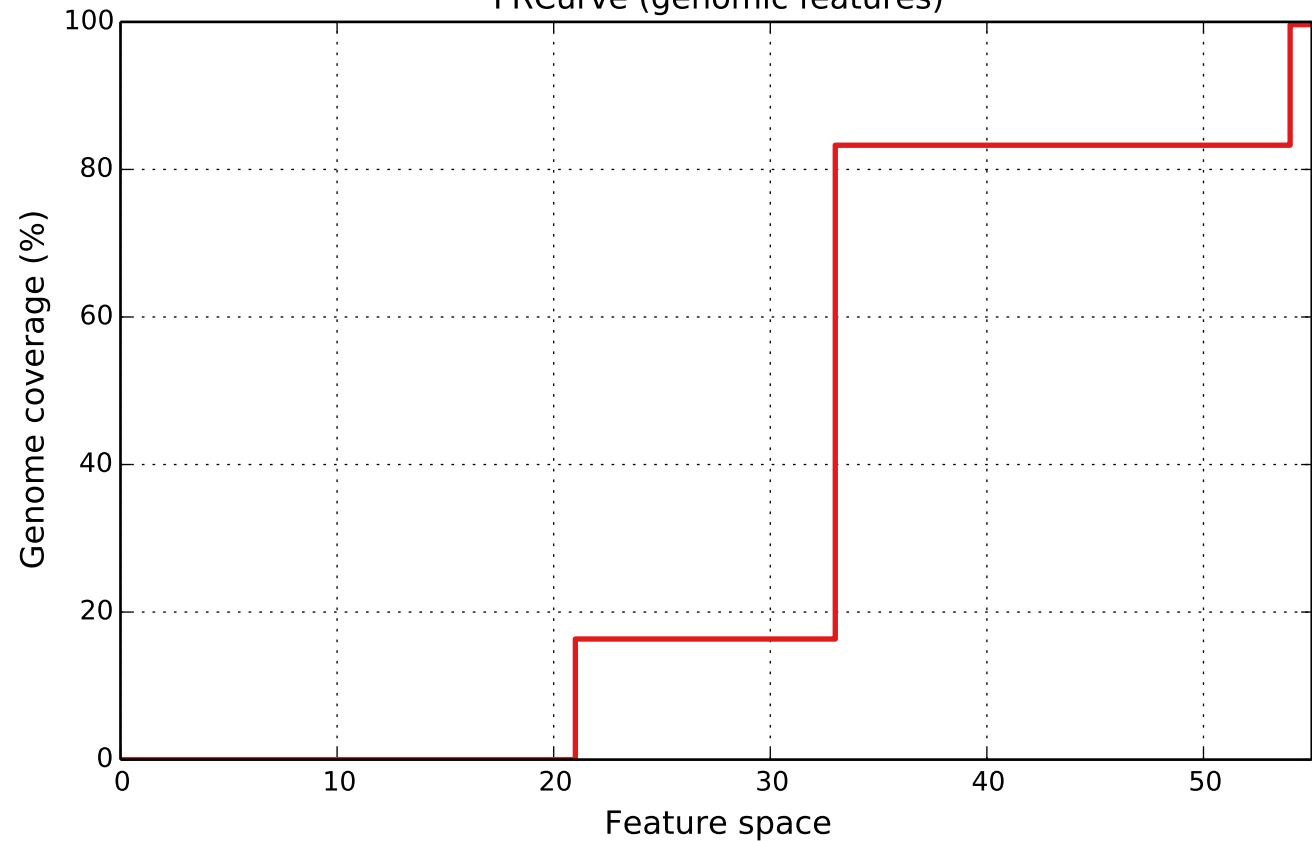

— CV29\_spades\_contigs

Supplement: Supplementary_File_2.zip [file Supplementary_File_2.zip]

Cumulative # complete genomic features

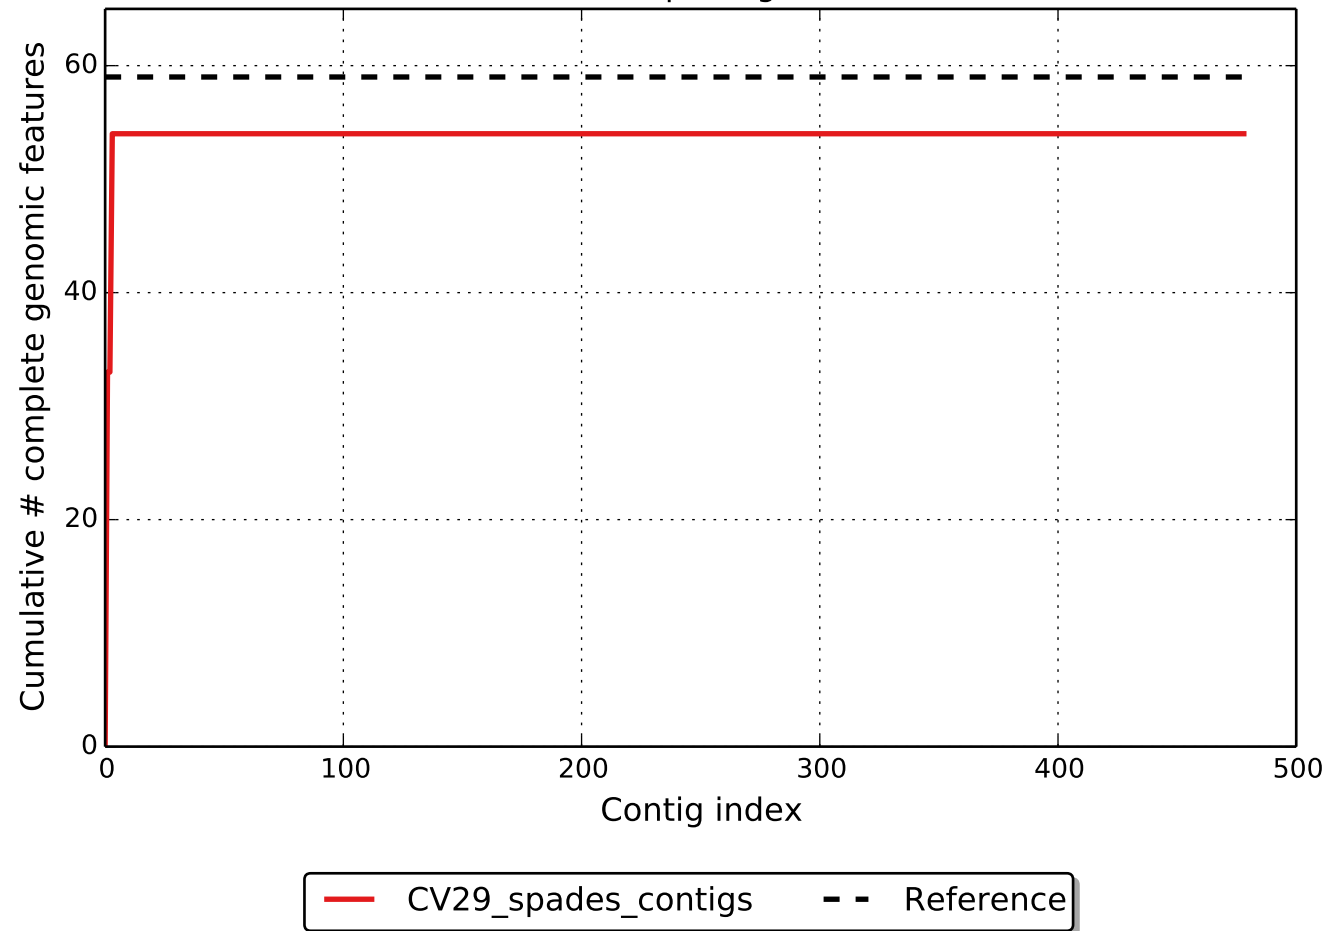

Supplement: Supplementary_File_2.zip [file Supplementary_File_2.zip]

Cumulative length (aligned contigs)

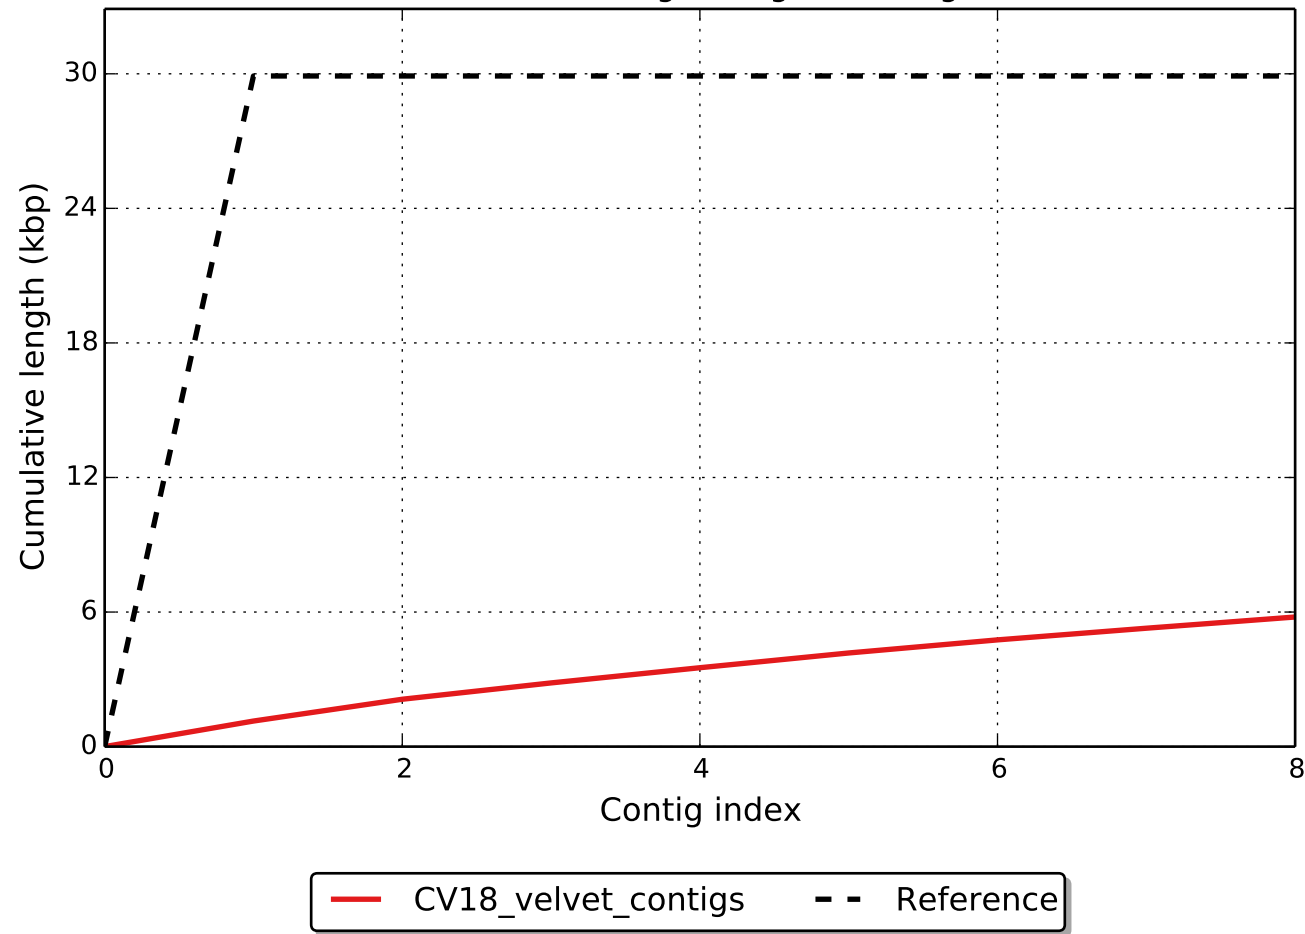

Supplement: Supplementary_File_2.zip [file Supplementary_File_2.zip]

FRCurve (misassemblies)

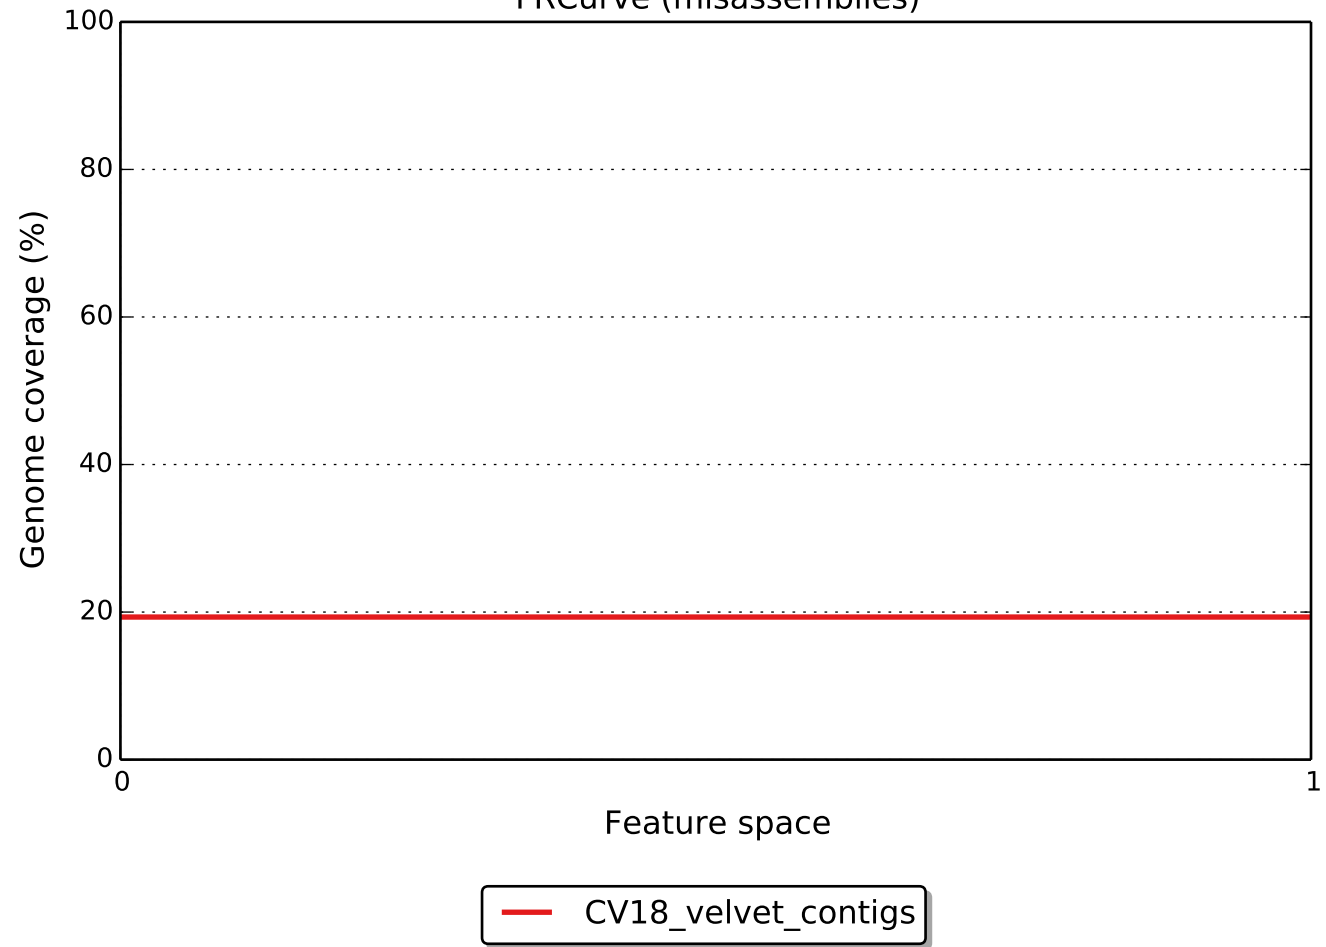

Supplement: Supplementary_File_2.zip [file Supplementary_File_2.zip]

NAx

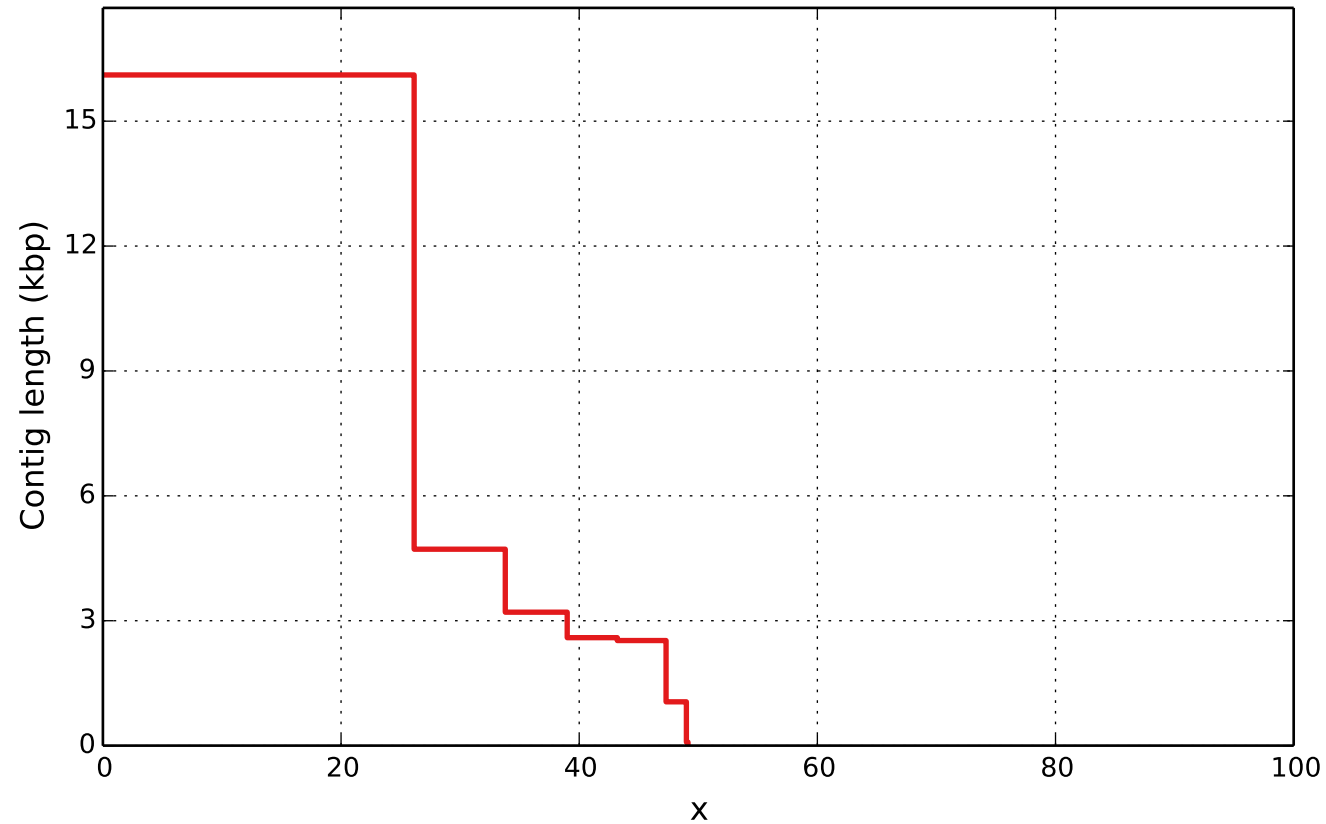

— CV45\_contigs

Supplement: Supplementary_File_2.zip [file Supplementary_File_2.zip]

# NGAx

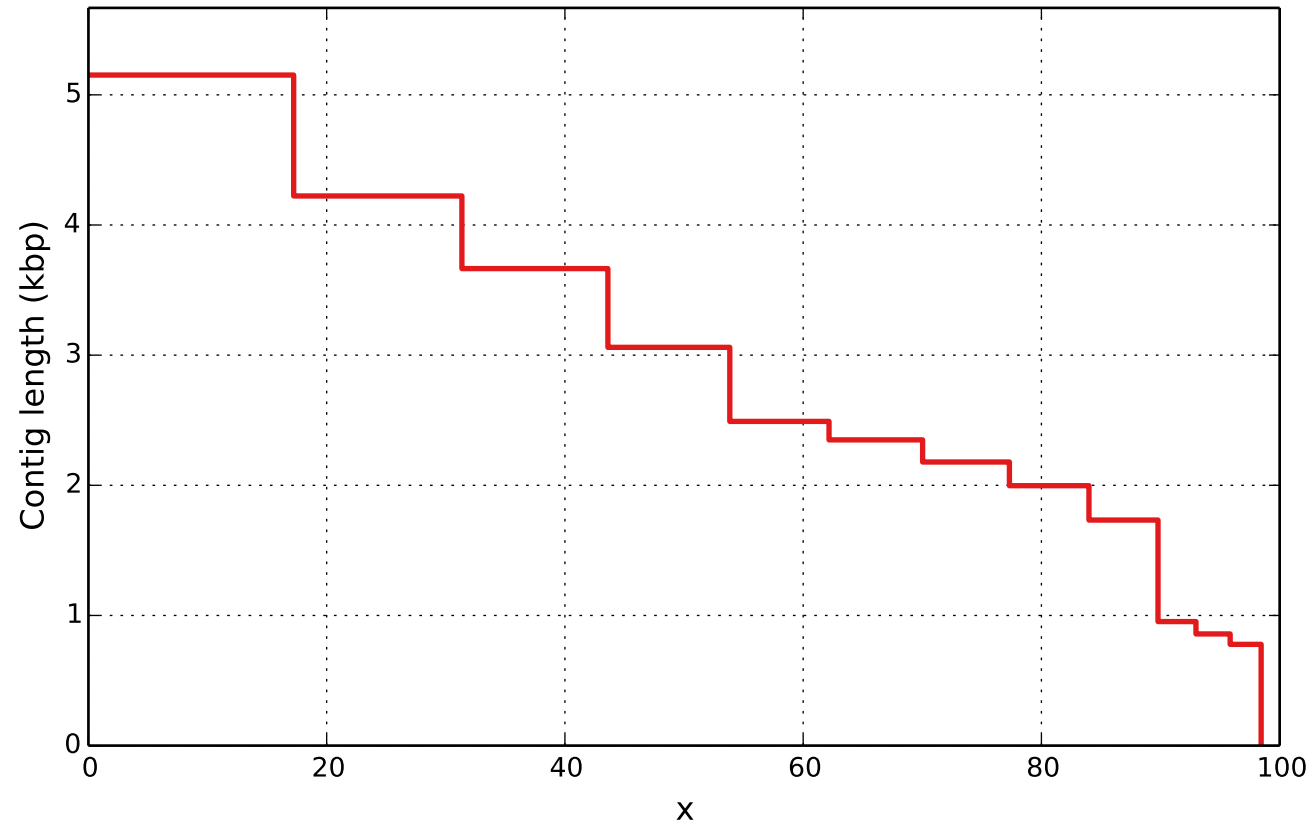

— CV115\_contigs

Supplement: Supplementary_File_2.zip [file Supplementary_File_2.zip]

Cumulative # complete genomic features

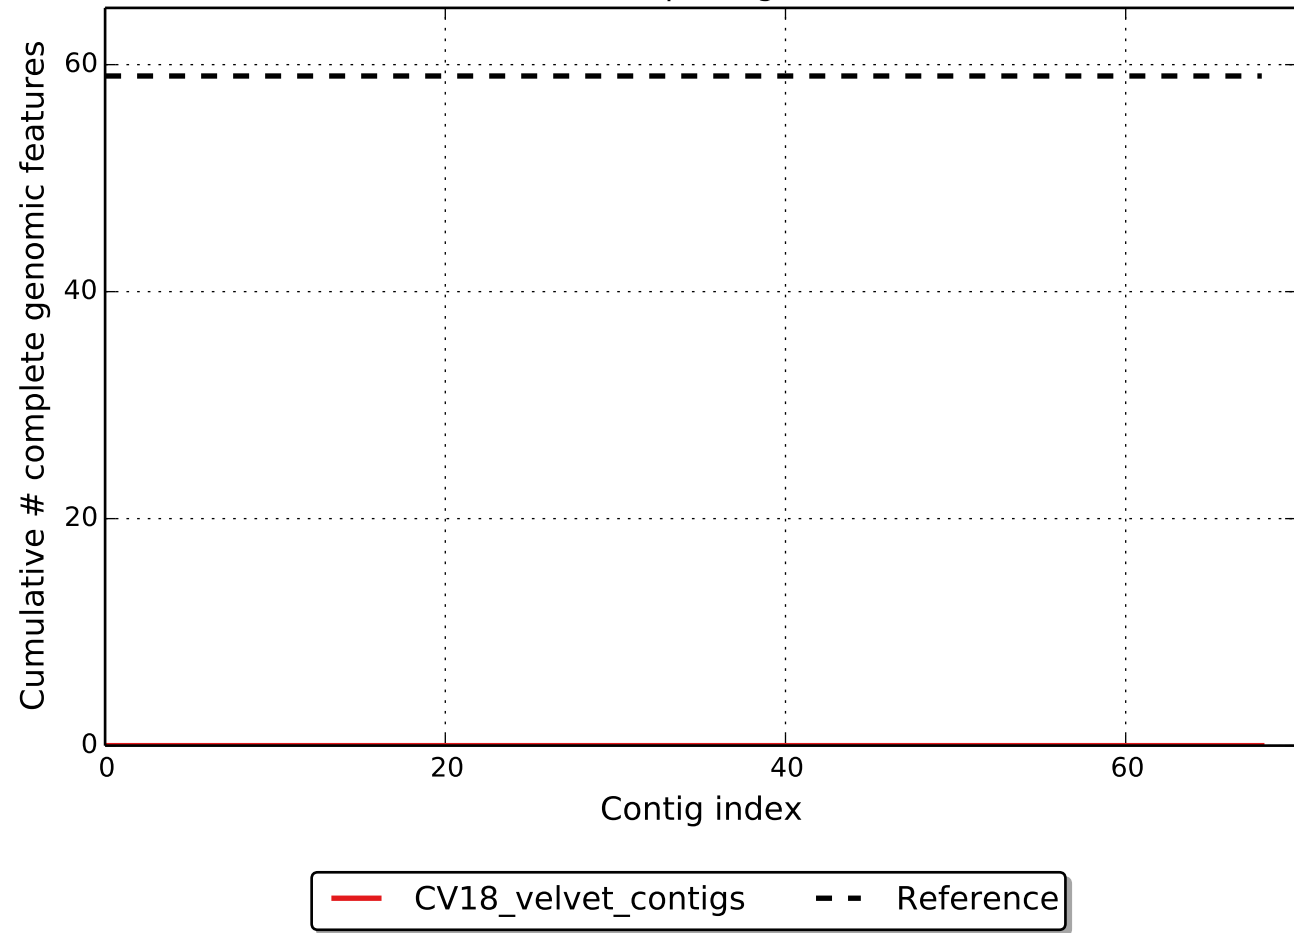

Supplement: Supplementary_File_2.zip [file Supplementary_File_2.zip]

FRCurve (genomic features)

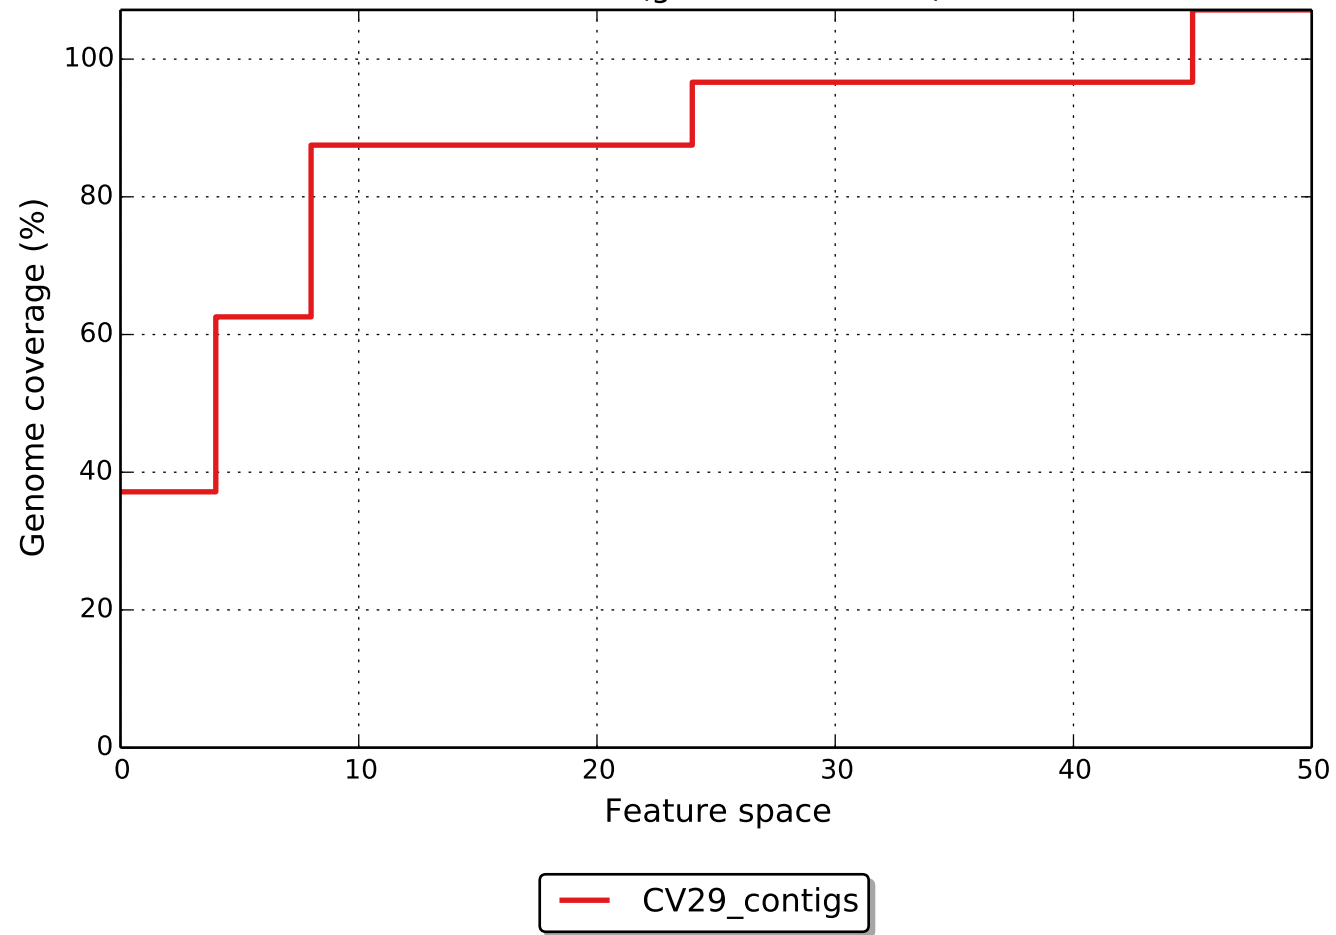

Supplement: Supplementary_File_2.zip [file Supplementary_File_2.zip]

# Misassemblies

5

4

3

2

1

0

CV18\_velvet\_contigs

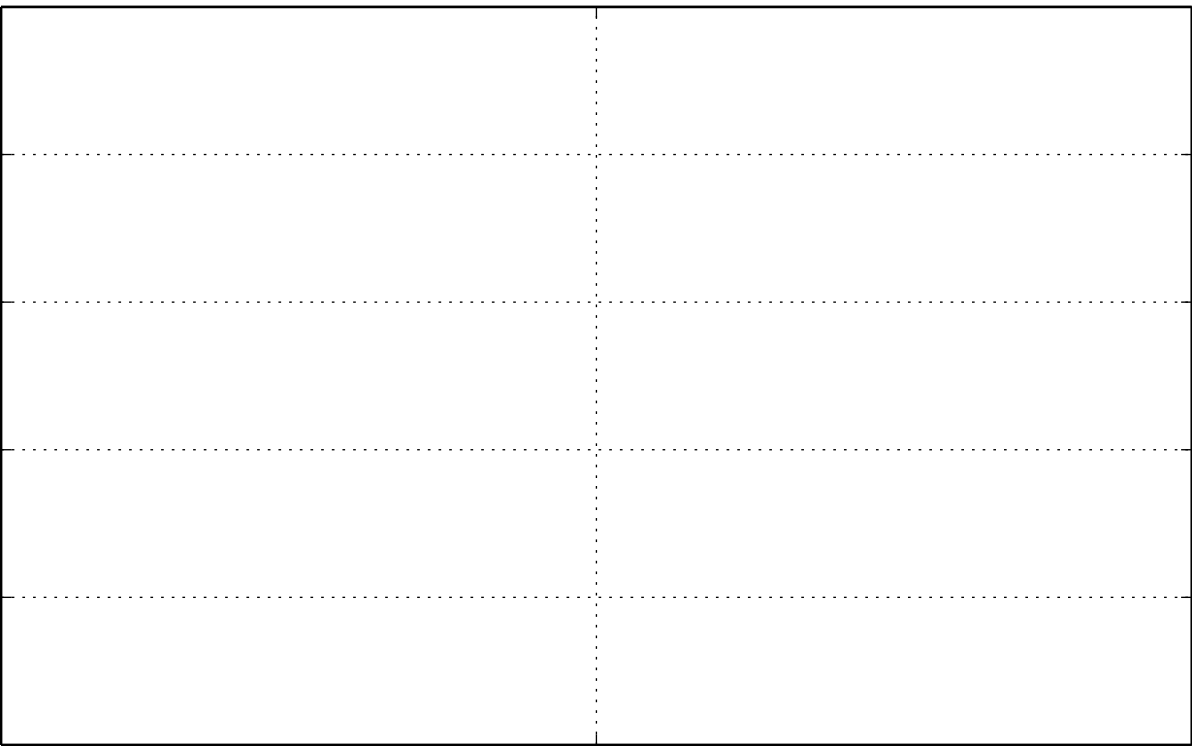

Supplement: Supplementary_File_2.zip [file Supplementary_File_2.zip]

NAx

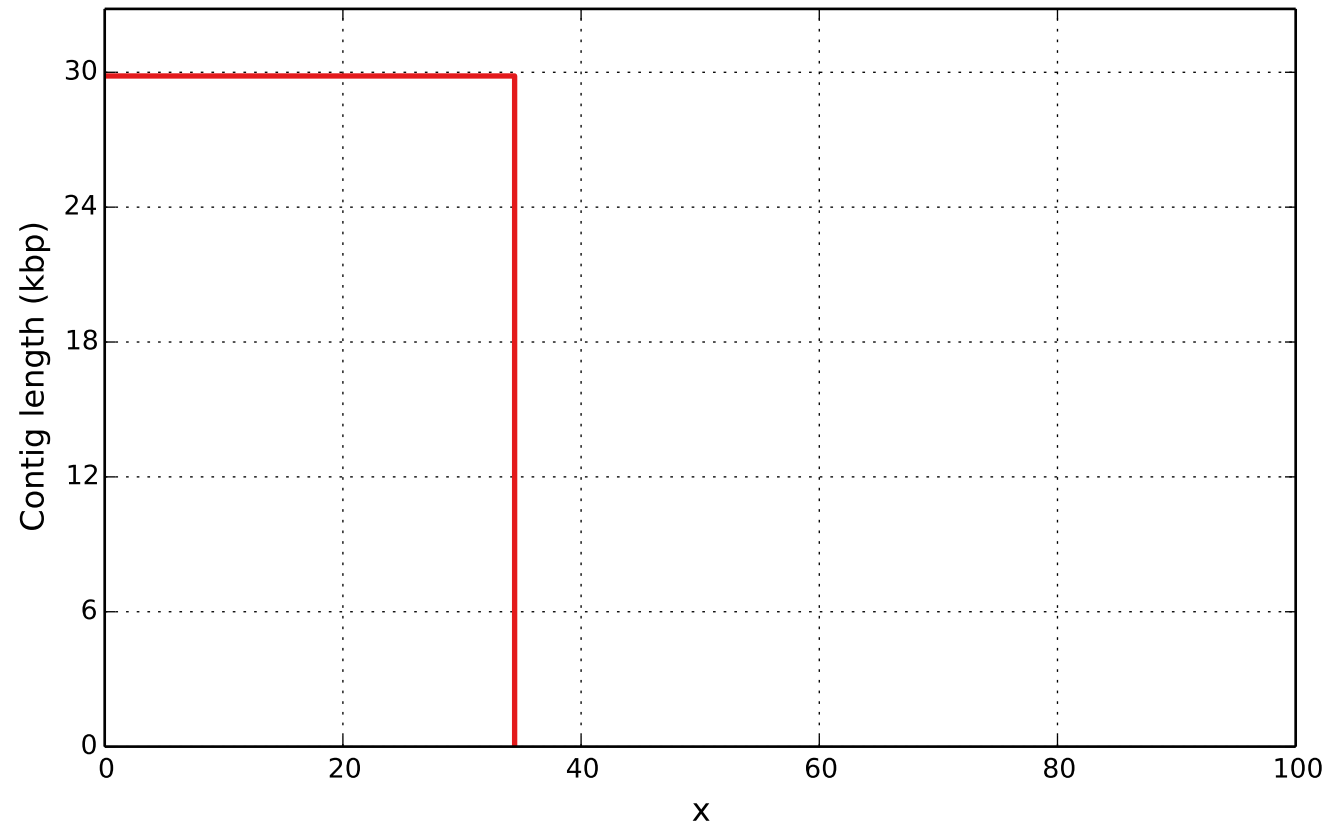

— CV18\_contigs

Supplement: Supplementary_File_2.zip [file Supplementary_File_2.zip]

# Misassemblies

5

4

3

2

1

0

CV29\_velvet\_contigs



Supplement: Supplementary_File_2.zip [file Supplementary_File_2.zip]

# Misassemblies

5

4

3

2

1

0

CV115\_contigs

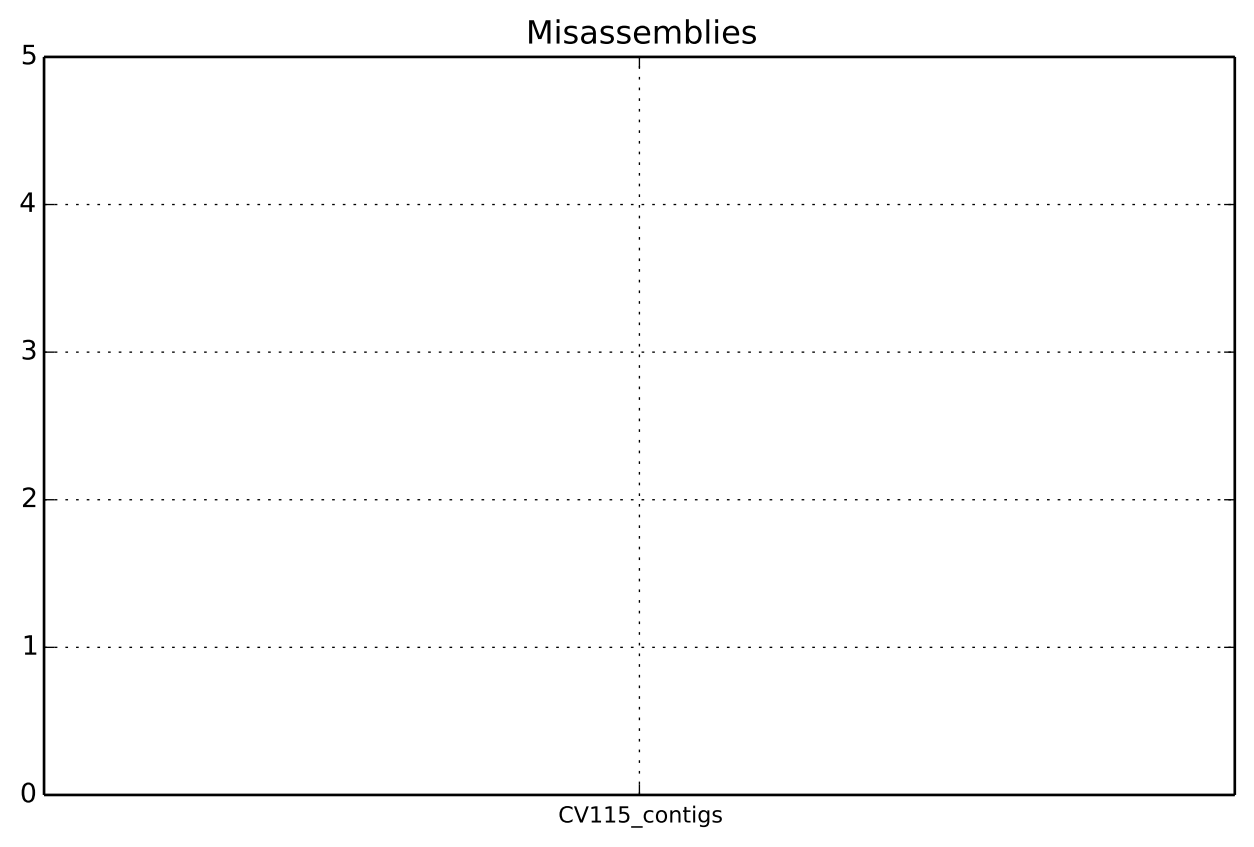

Supplement: Supplementary_File_2.zip [file Supplementary_File_2.zip]

GC content

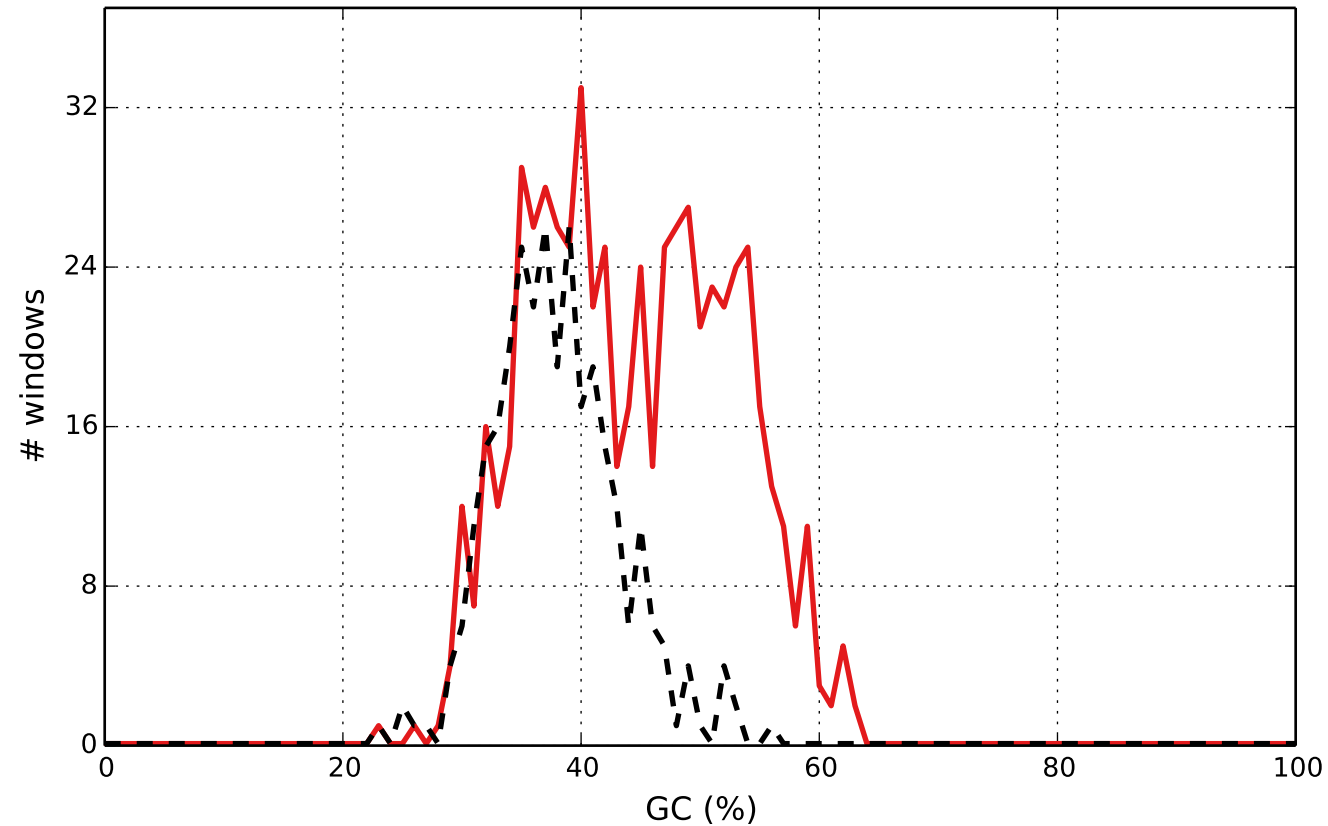

— CV45\_contigs    - - Reference

Supplement: Supplementary_File_2.zip [file Supplementary_File_2.zip]

Cumulative length

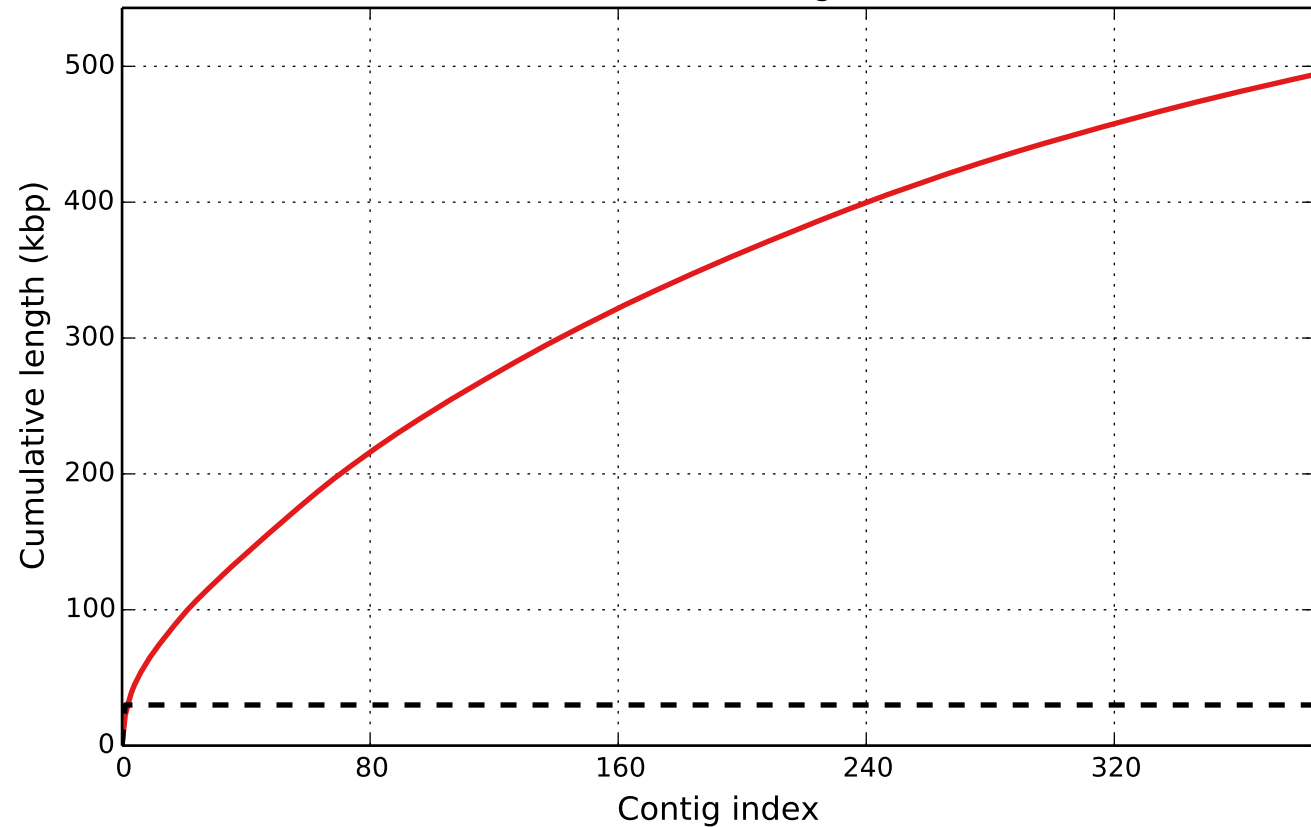

— CV18\_spades\_contigs    - - Reference

Supplement: Supplementary_File_2.zip [file Supplementary_File_2.zip]

# Misassemblies

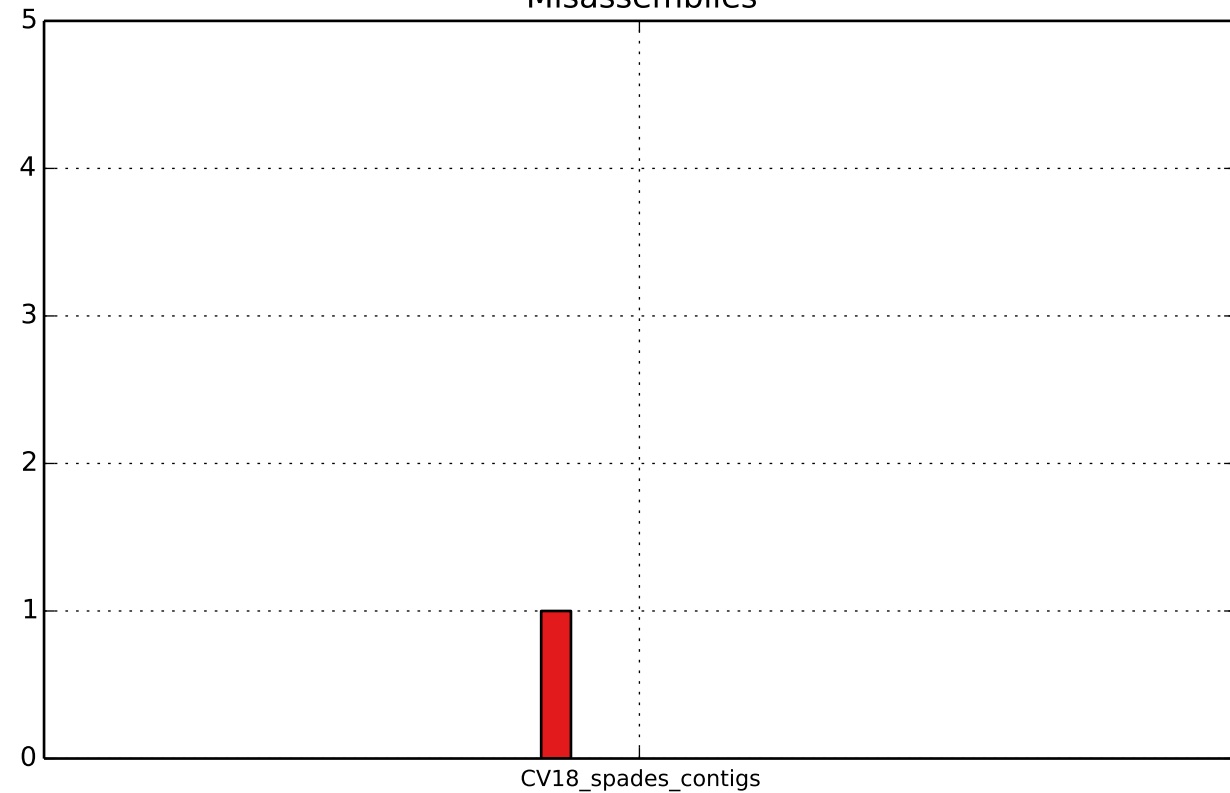

 # relocations

Supplement: Supplementary_File_2.zip [file Supplementary_File_2.zip]

GC content

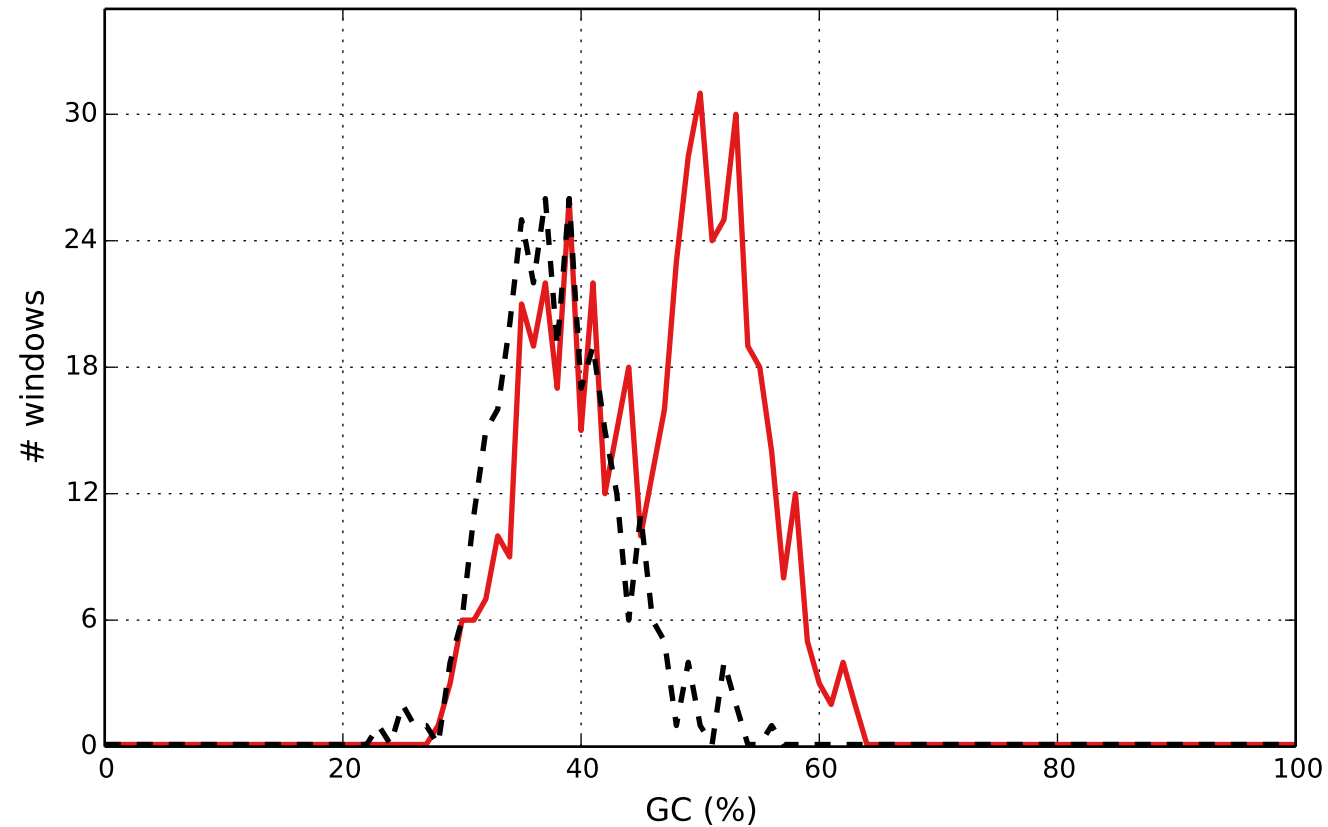

— CV145\_contigs    - - Reference

Supplement: Supplementary_File_2.zip [file Supplementary_File_2.zip]

# Misassemblies

5

4

3

2

1

0

CV29\_spades\_contigs



Supplement: Supplementary_File_2.zip [file Supplementary_File_2.zip]

Cumulative length (aligned contigs)

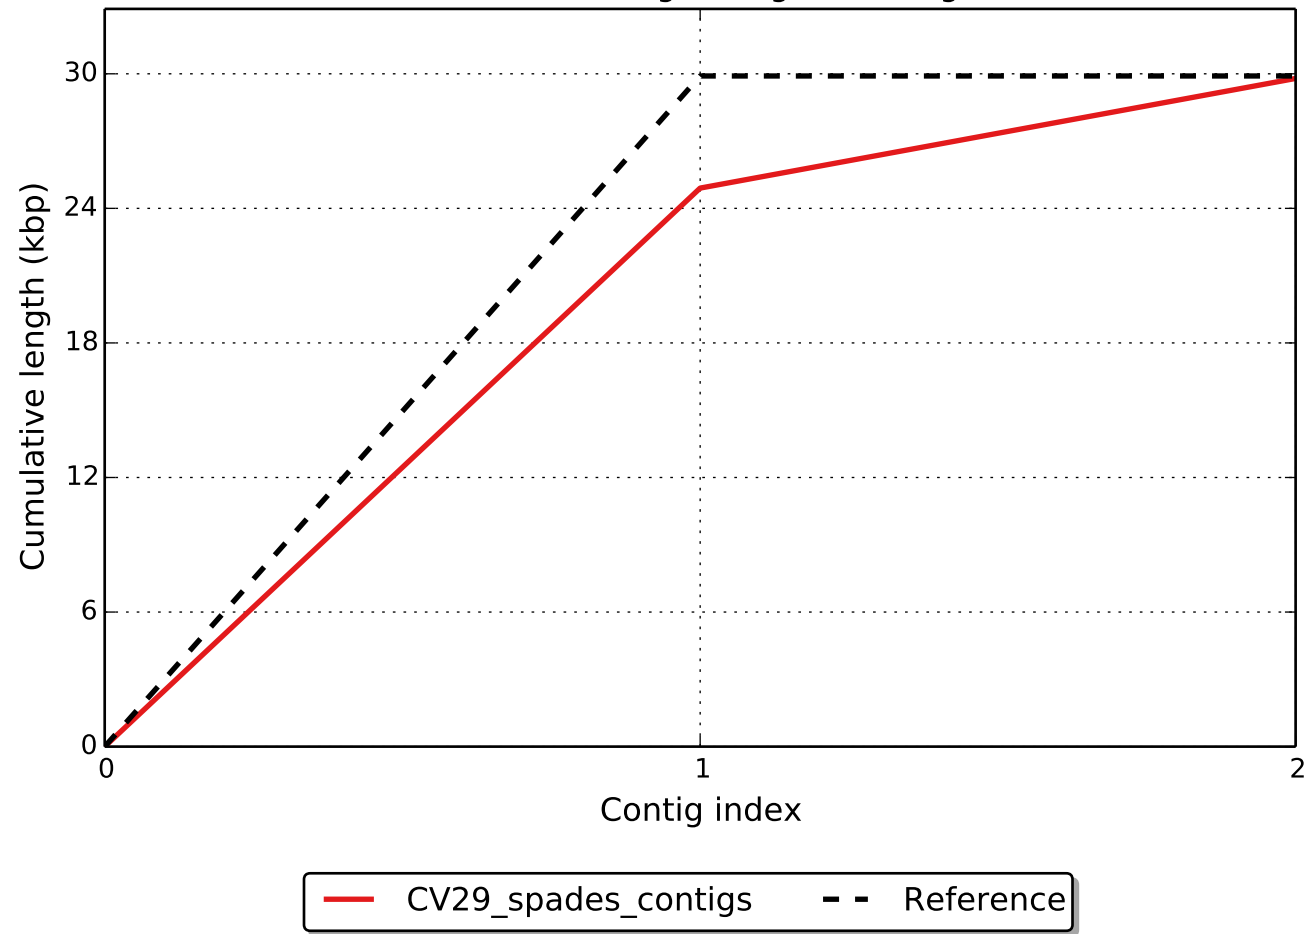

Supplement: Supplementary_File_2.zip [file Supplementary_File_2.zip]

CV18\_contigs GC content

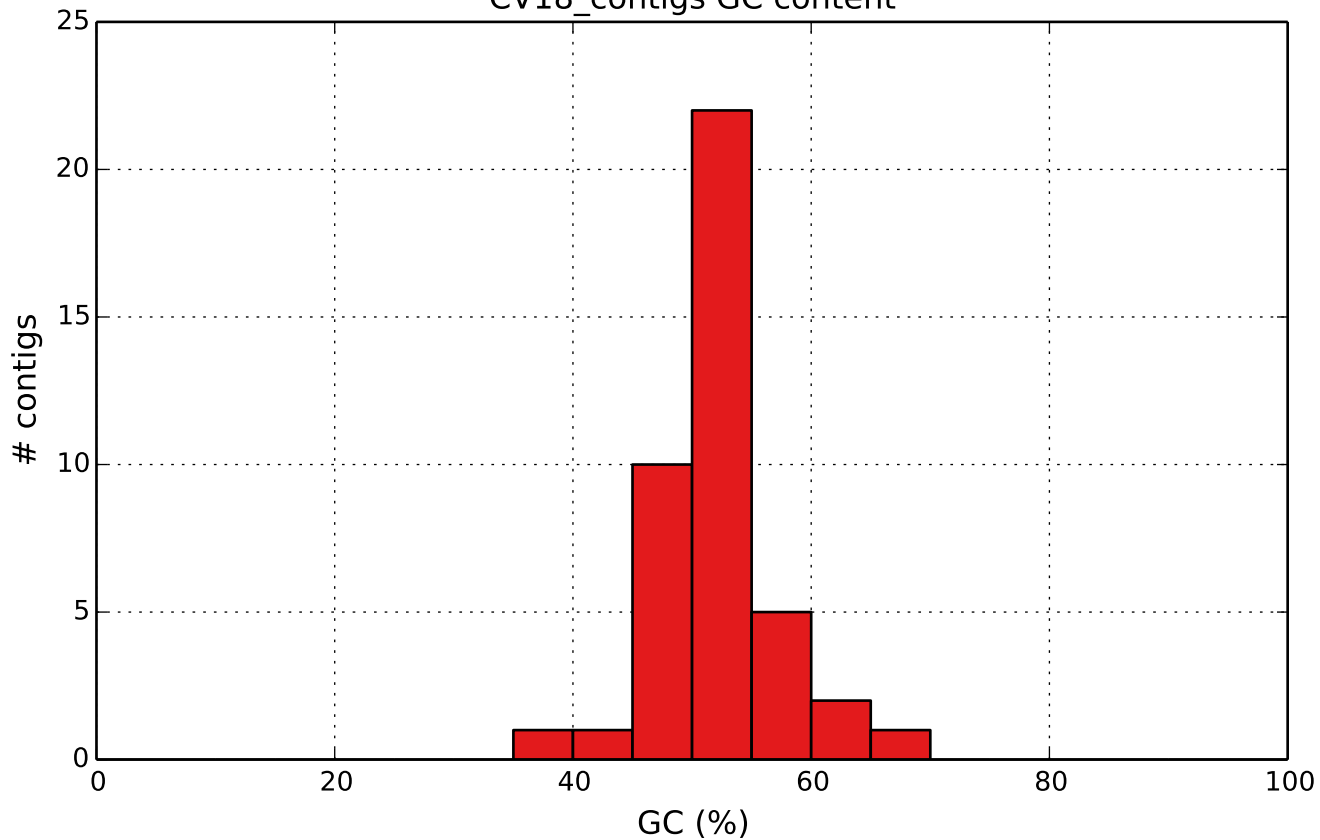

CV18\_contigs

Supplement: Supplementary_File_2.zip [file Supplementary_File_2.zip]

FRCurve (misassemblies)

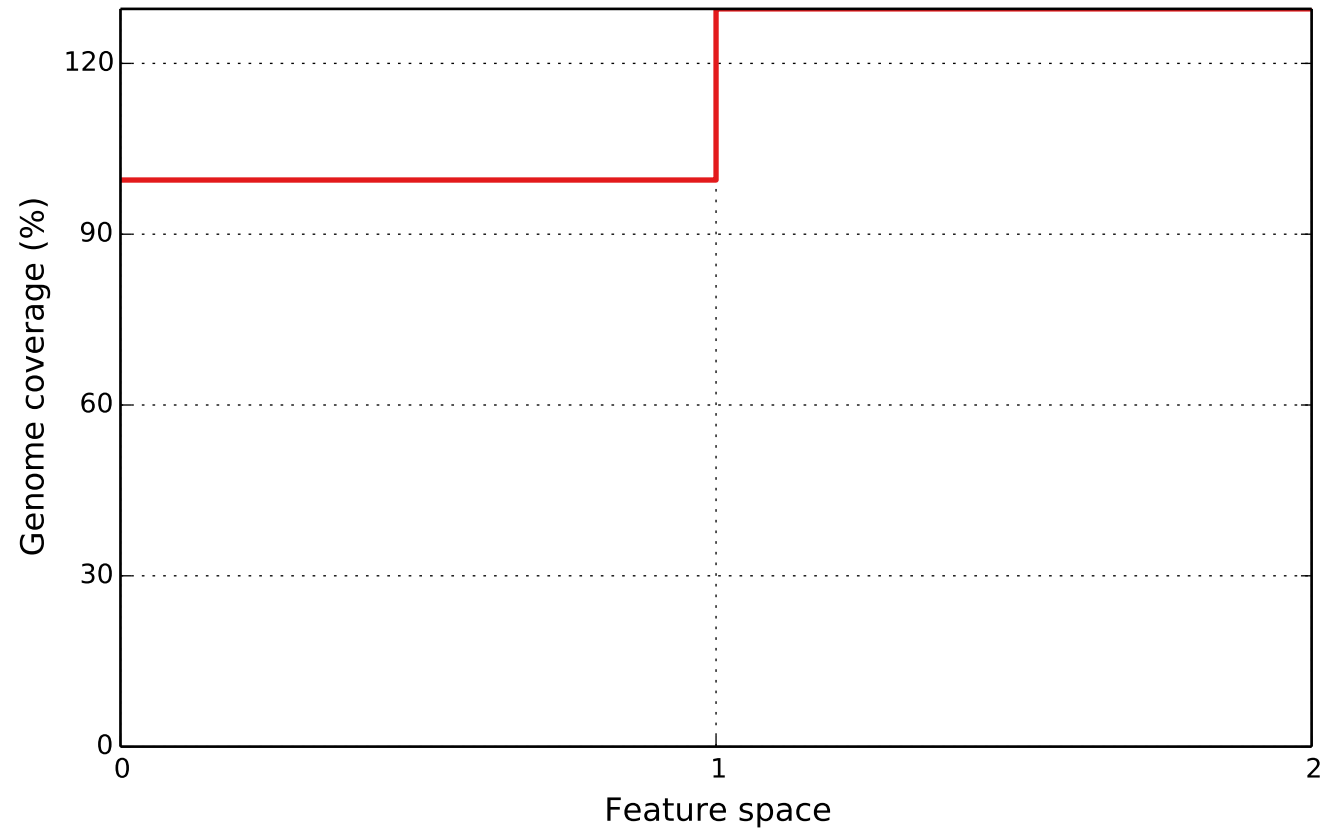

CV18\_spades\_contigs

Supplement: Supplementary_File_2.zip [file Supplementary_File_2.zip]

# Misassemblies

5

4

3

2

1

0

CV145\_contigs

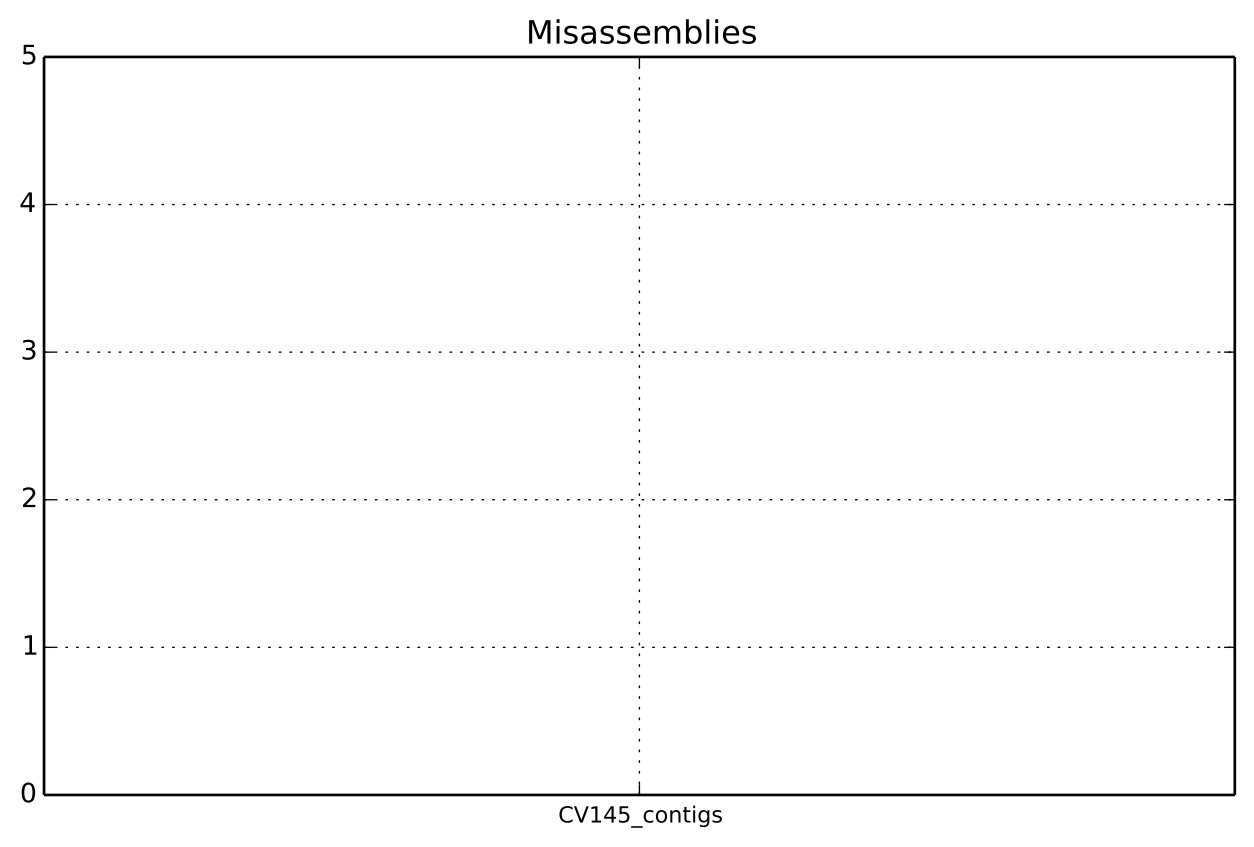

Supplement: Supplementary_File_2.zip [file Supplementary_File_2.zip]

# GC content

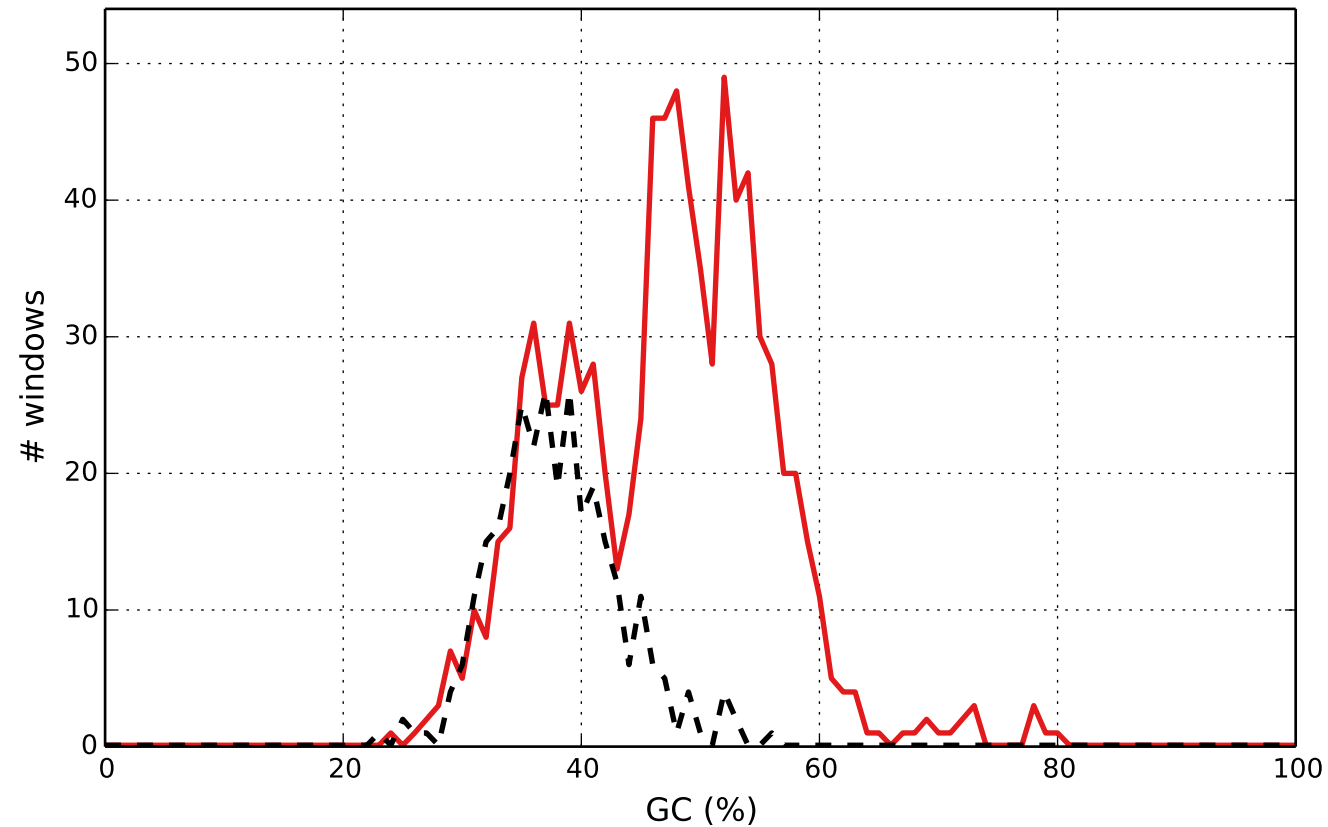

— CV18\_contigs    - - Reference

Supplement: Supplementary_File_2.zip [file Supplementary_File_2.zip]

NGx

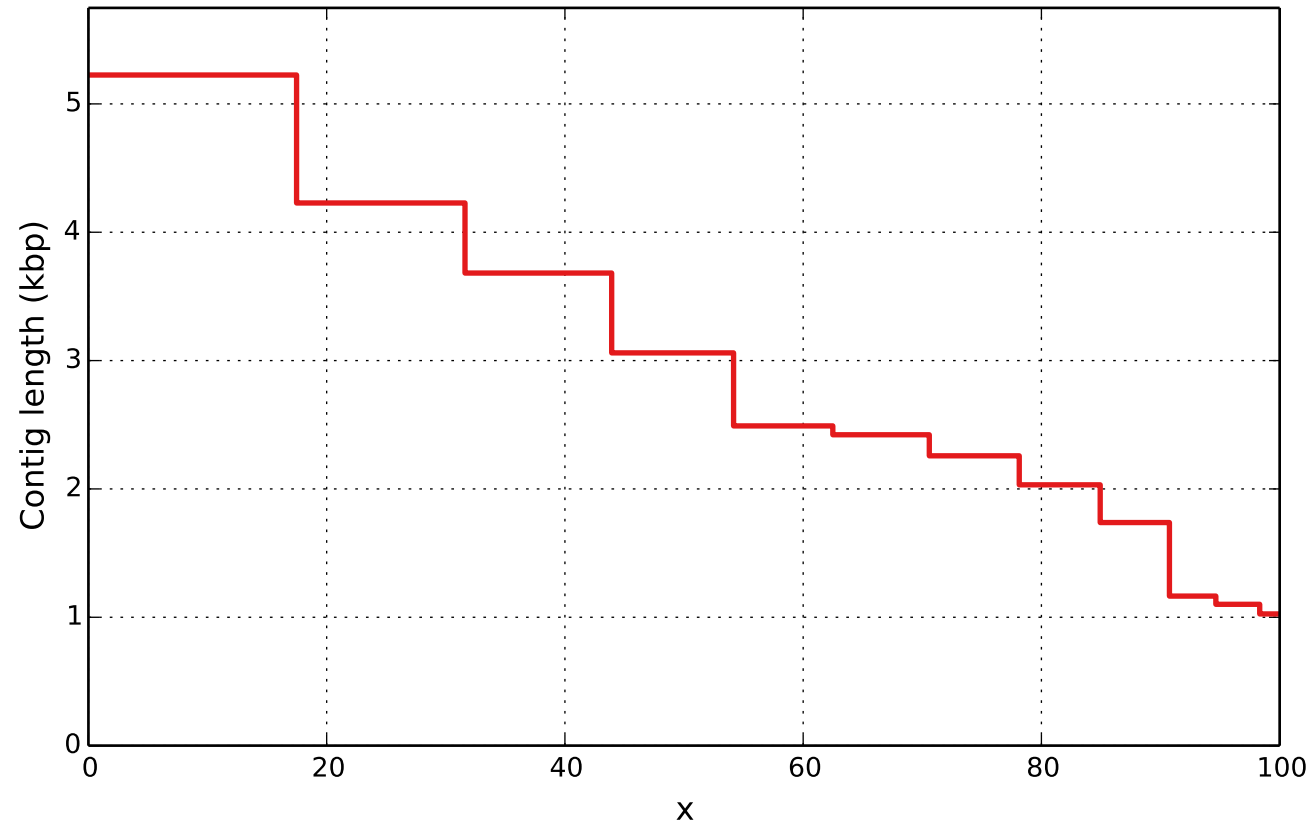

— CV115\_contigs

Supplement: Supplementary_File_2.zip [file Supplementary_File_2.zip]

GC content

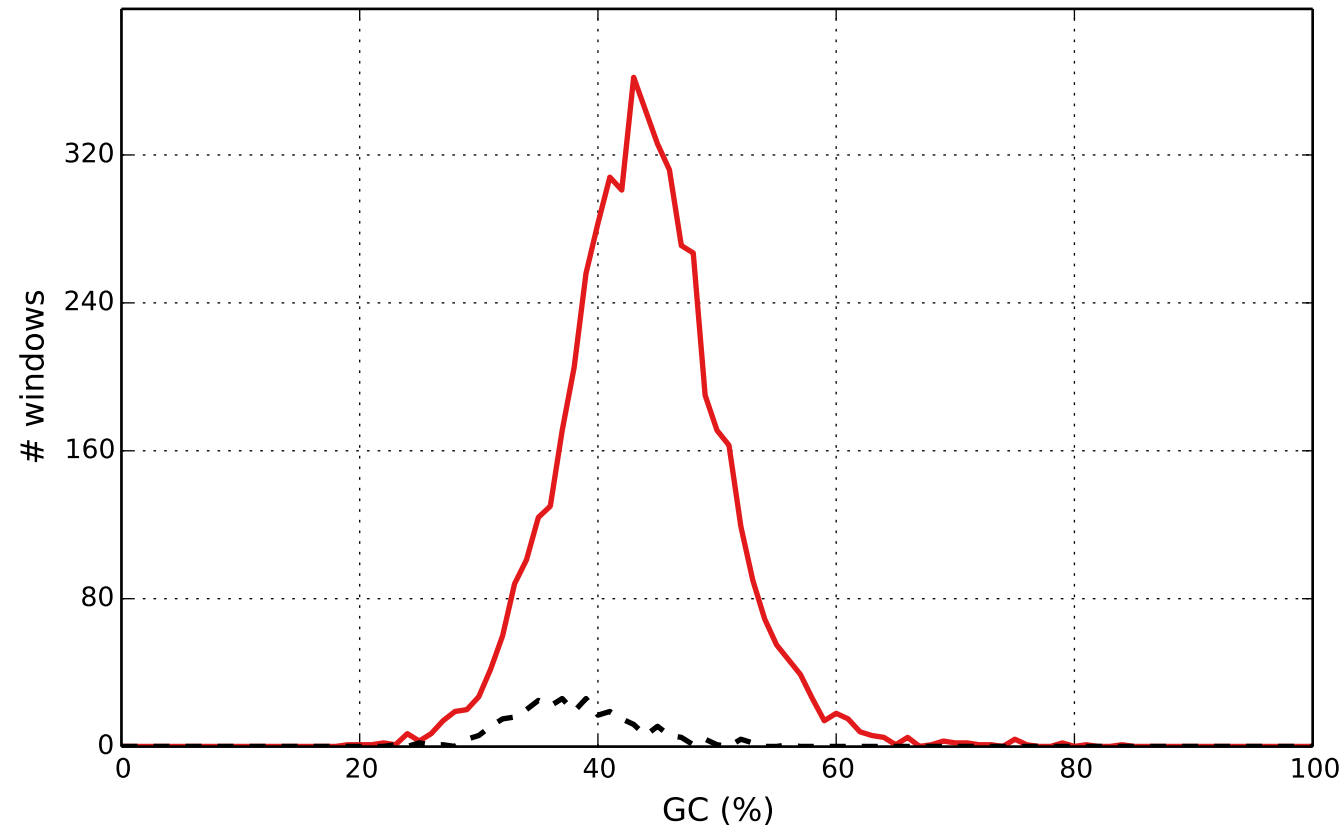

— CV29\_spades\_contigs    - - Reference

Supplement: Supplementary_File_2.zip [file Supplementary_File_2.zip]

# NGAx

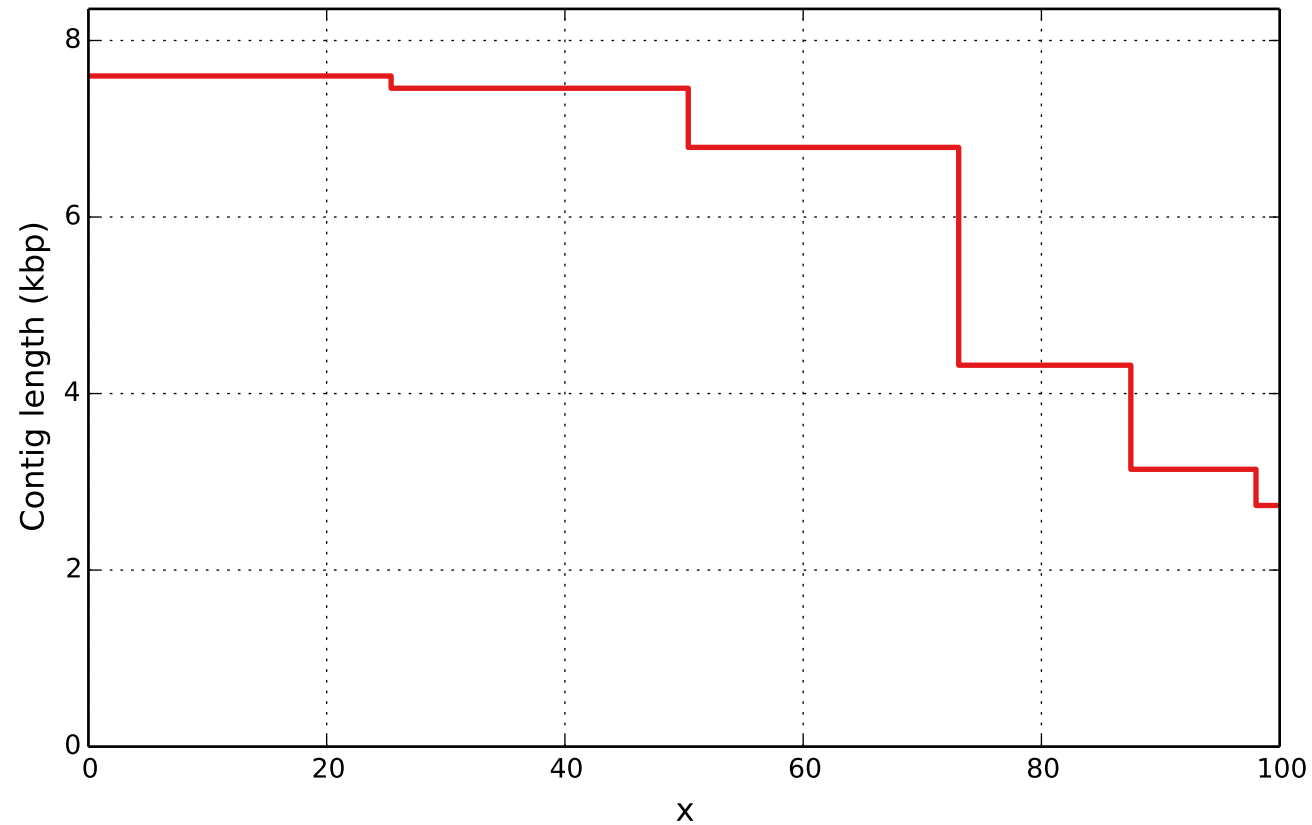

— CV29\_contigs

Supplement: Supplementary_File_2.zip [file Supplementary_File_2.zip]

Cumulative # complete genomic features

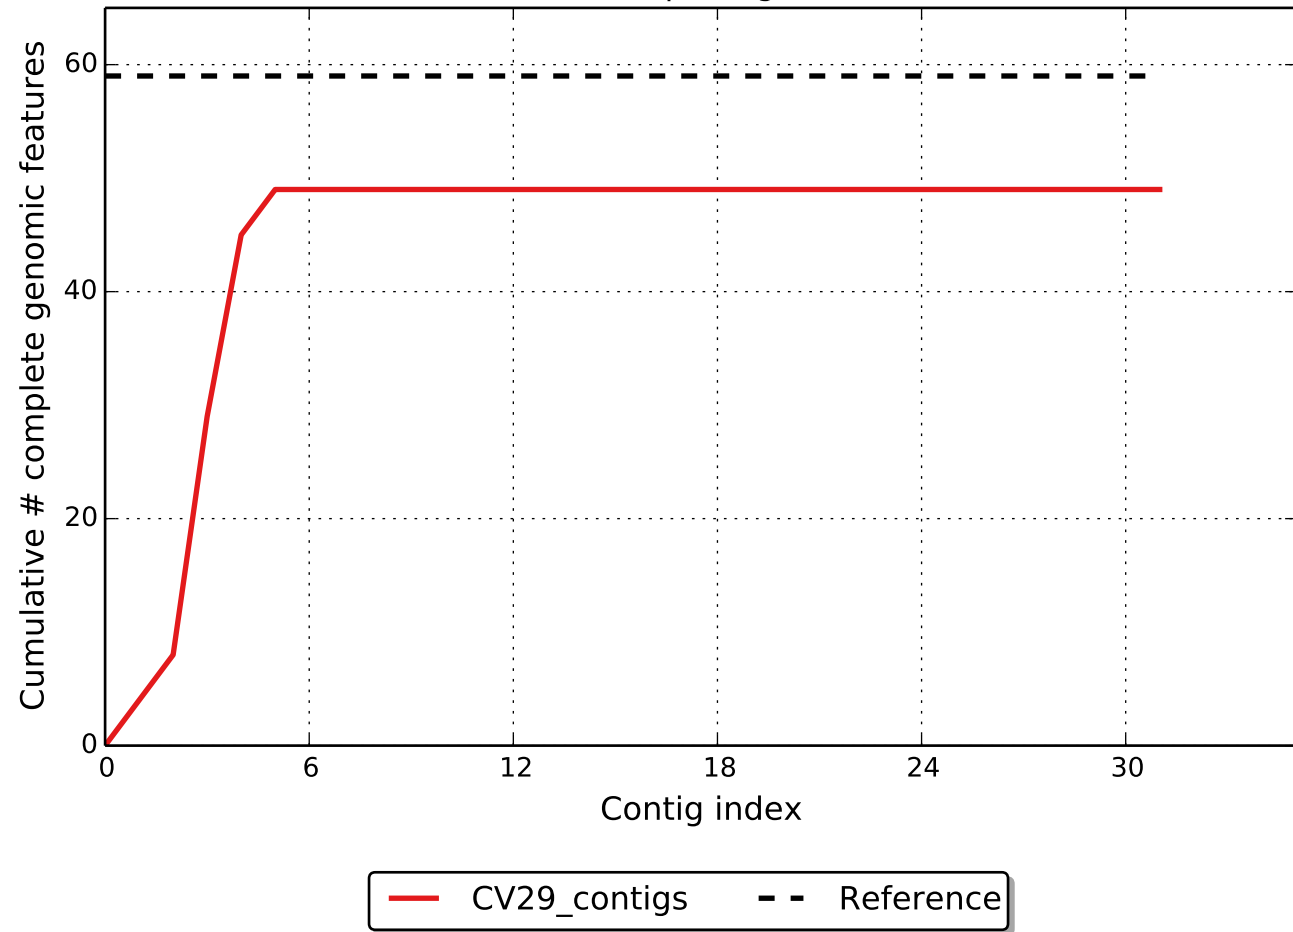

Supplement: Supplementary_File_2.zip [file Supplementary_File_2.zip]

CV29\_spades\_contigs GC content

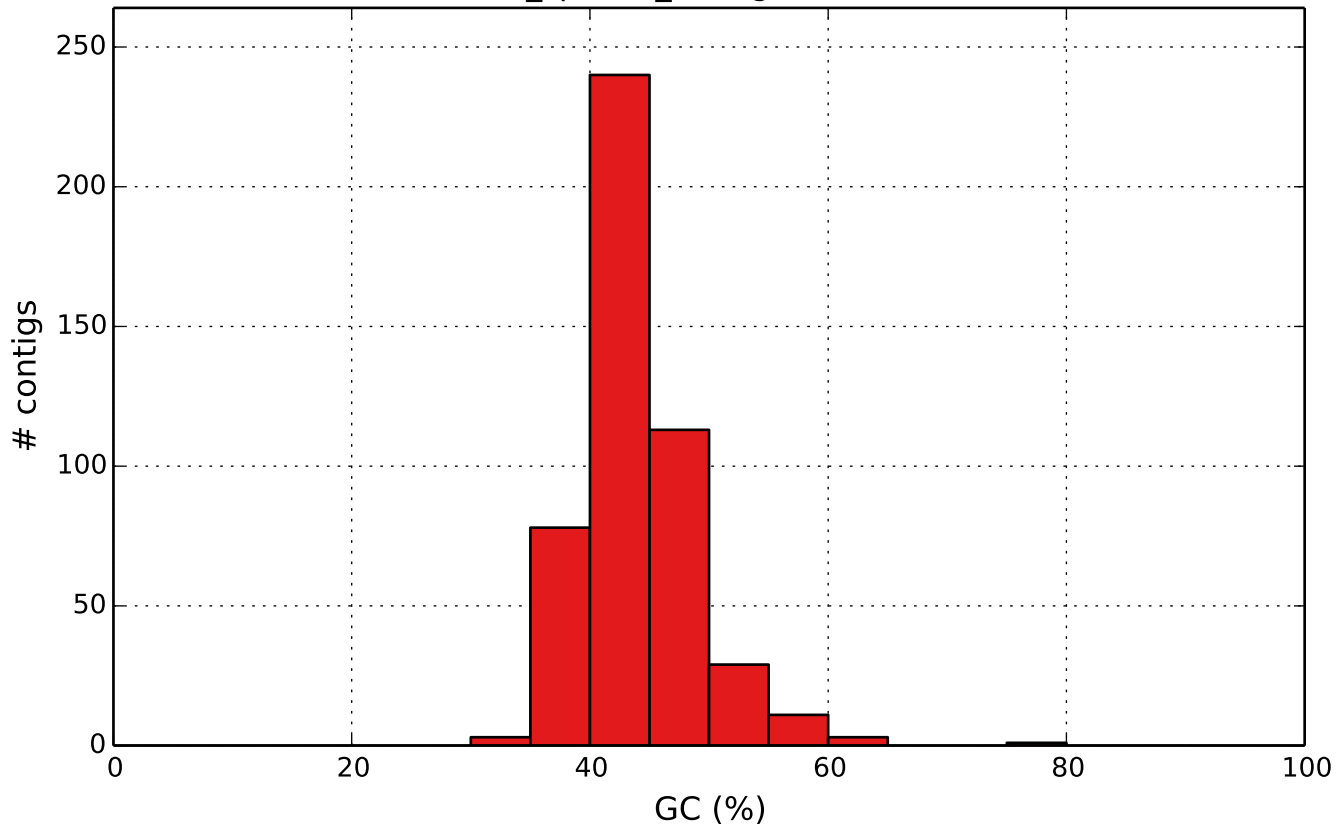

CV29\_spades\_contigs

Supplement: Supplementary_File_2.zip [file Supplementary_File_2.zip]

FRCurve (genomic features)

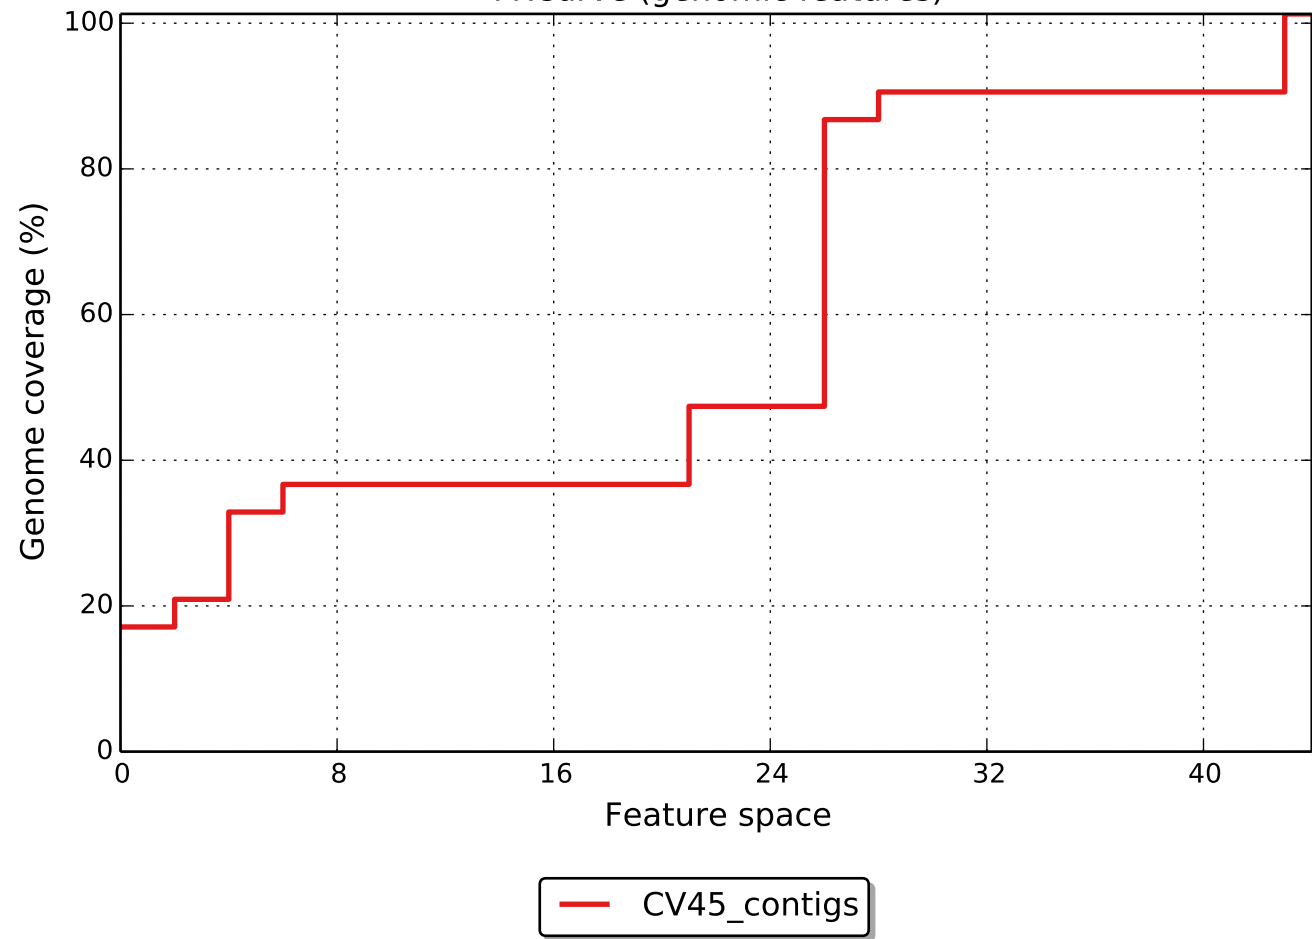

Supplement: Supplementary_File_2.zip [file Supplementary_File_2.zip]

NAx

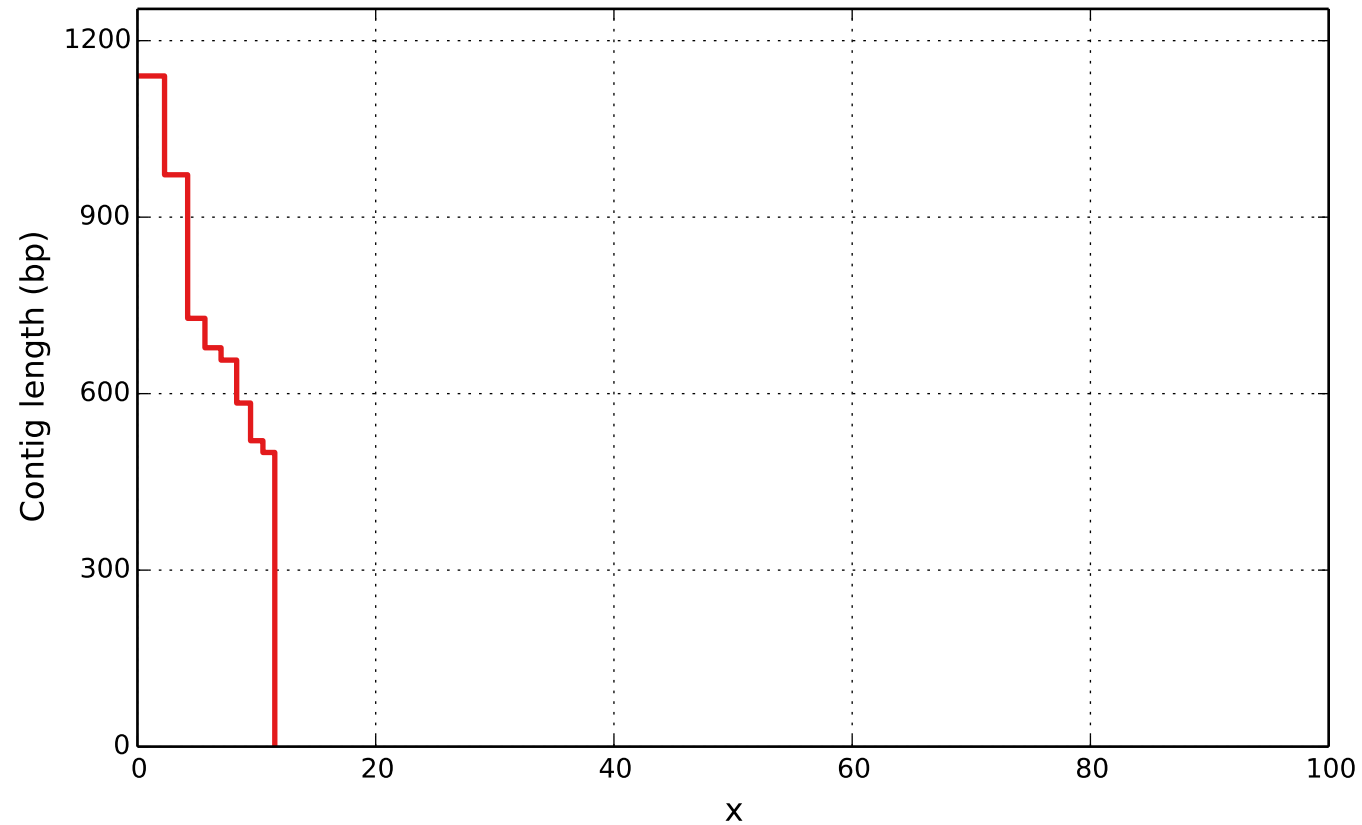

— CV18\_velvet\_contigs

Supplement: Supplementary_File_2.zip [file Supplementary_File_2.zip]

Cumulative length

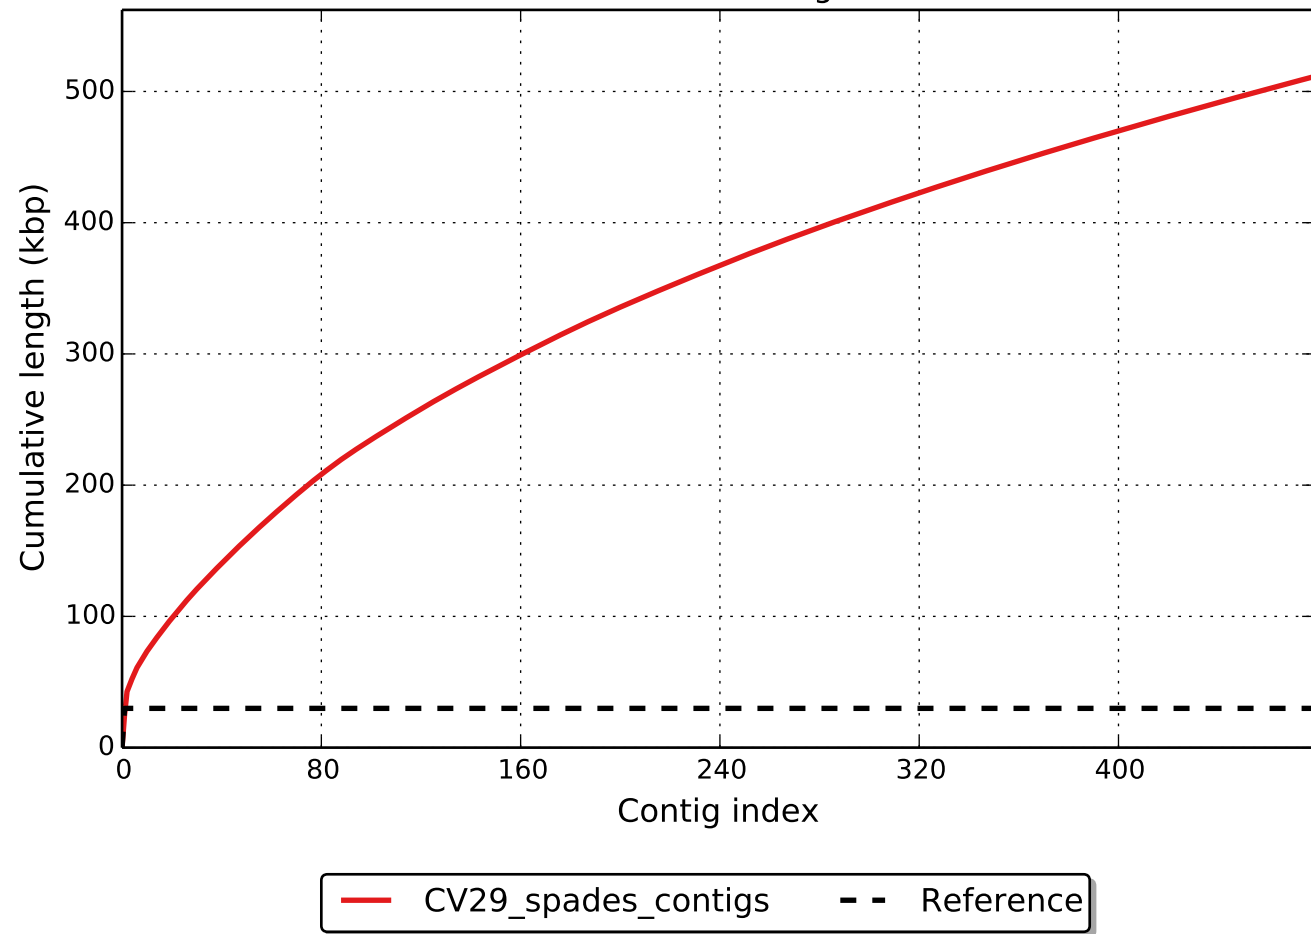

Supplement: Supplementary_File_2.zip [file Supplementary_File_2.zip]

Nx

Contig length (kbp)

25

20

15

10

5

0

0

20

40

60

80

100

x

CV29\_spades\_contigs

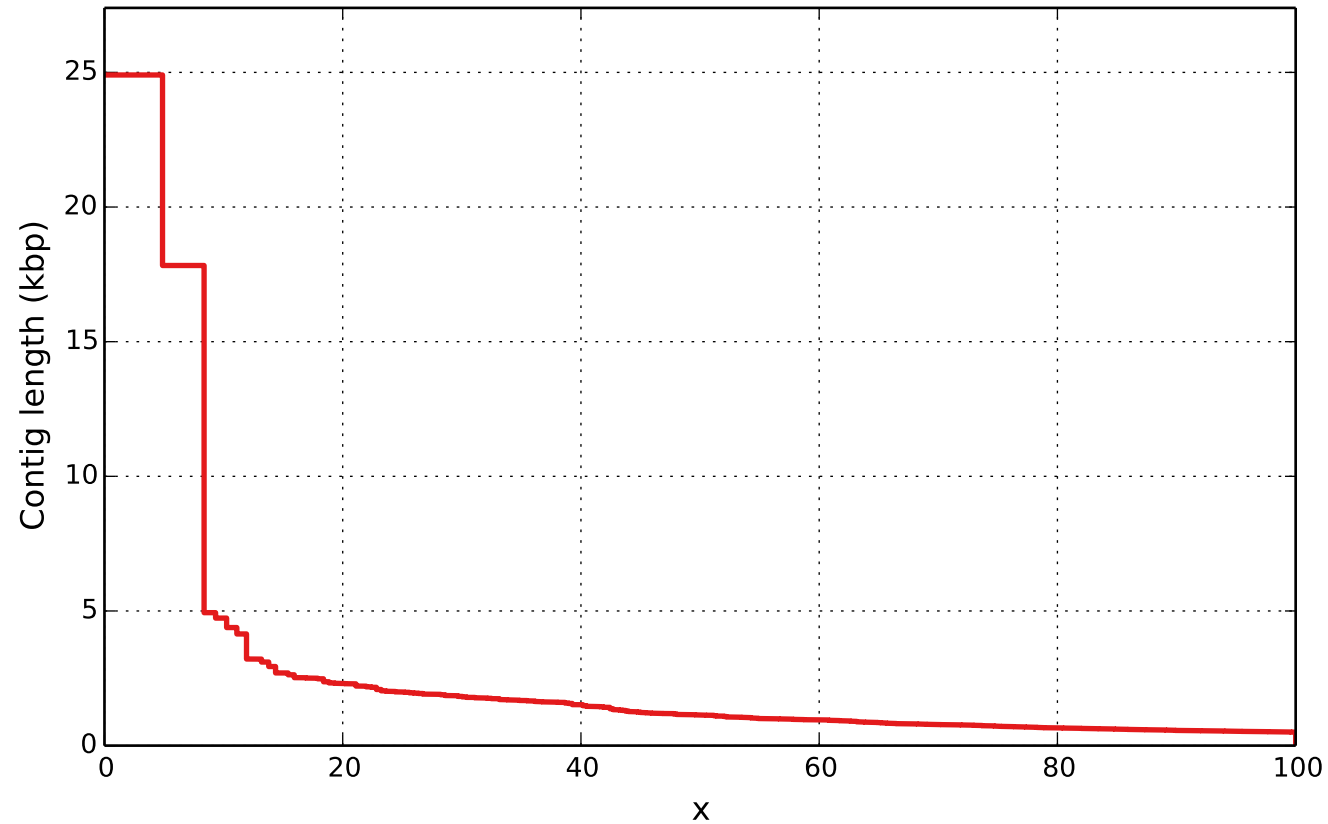

Supplement: Supplementary_File_2.zip [file Supplementary_File_2.zip]

Cumulative length (aligned contigs)

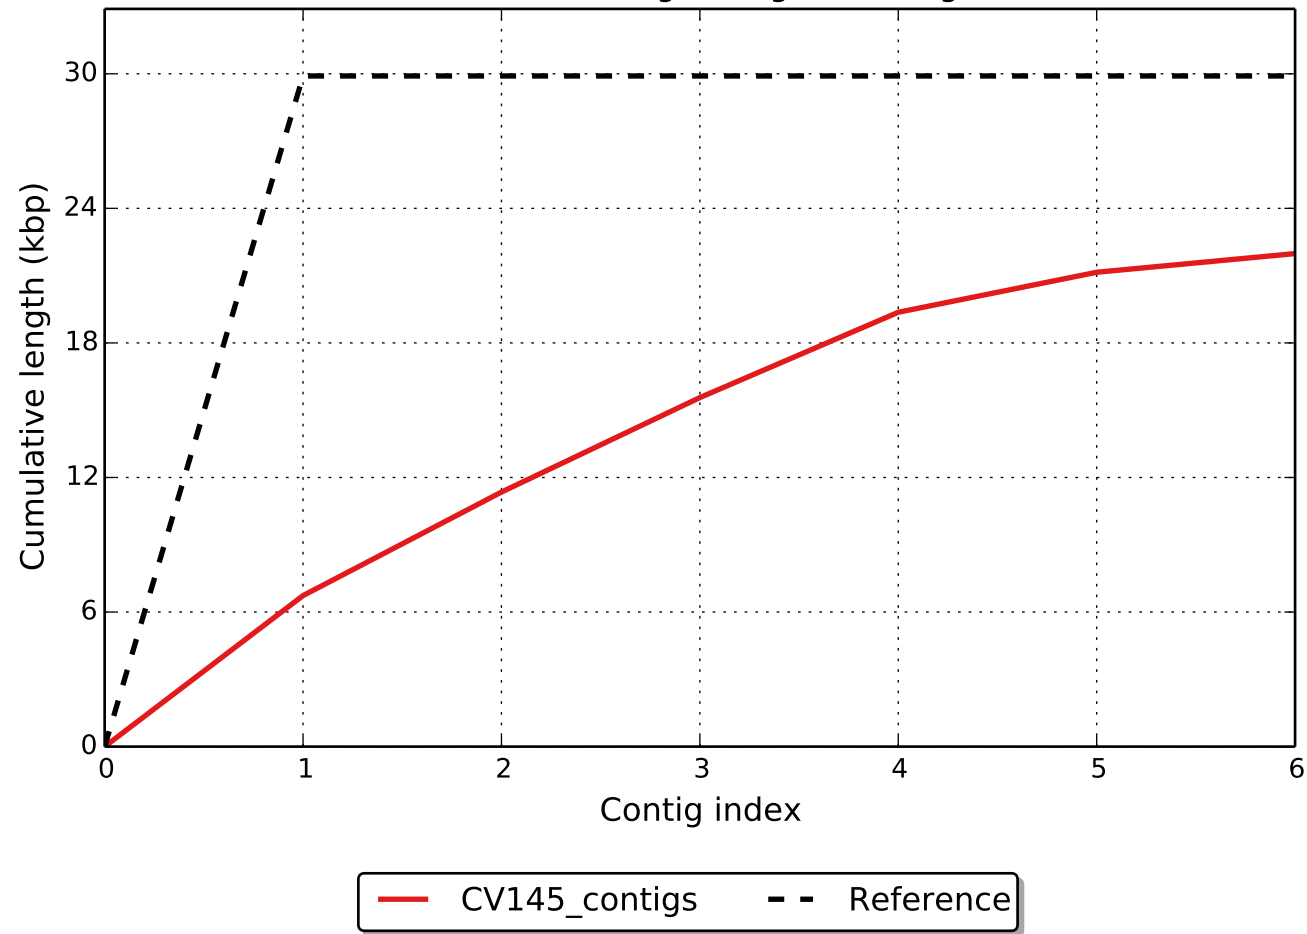

Supplement: Supplementary_File_2.zip [file Supplementary_File_2.zip]

NGAx

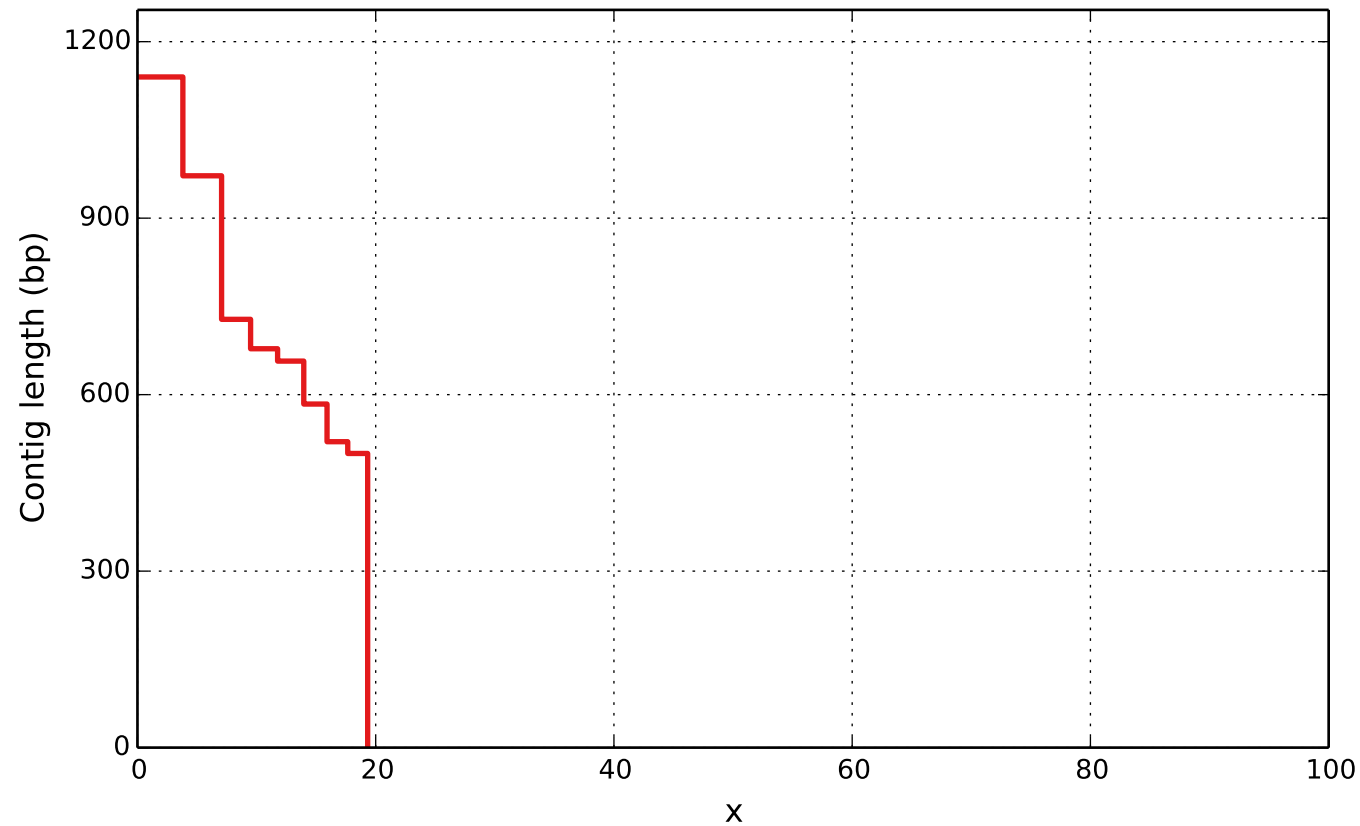

— CV18\_velvet\_contigs

Supplement: Supplementary_File_2.zip [file Supplementary_File_2.zip]

FRCurve (genomic features)

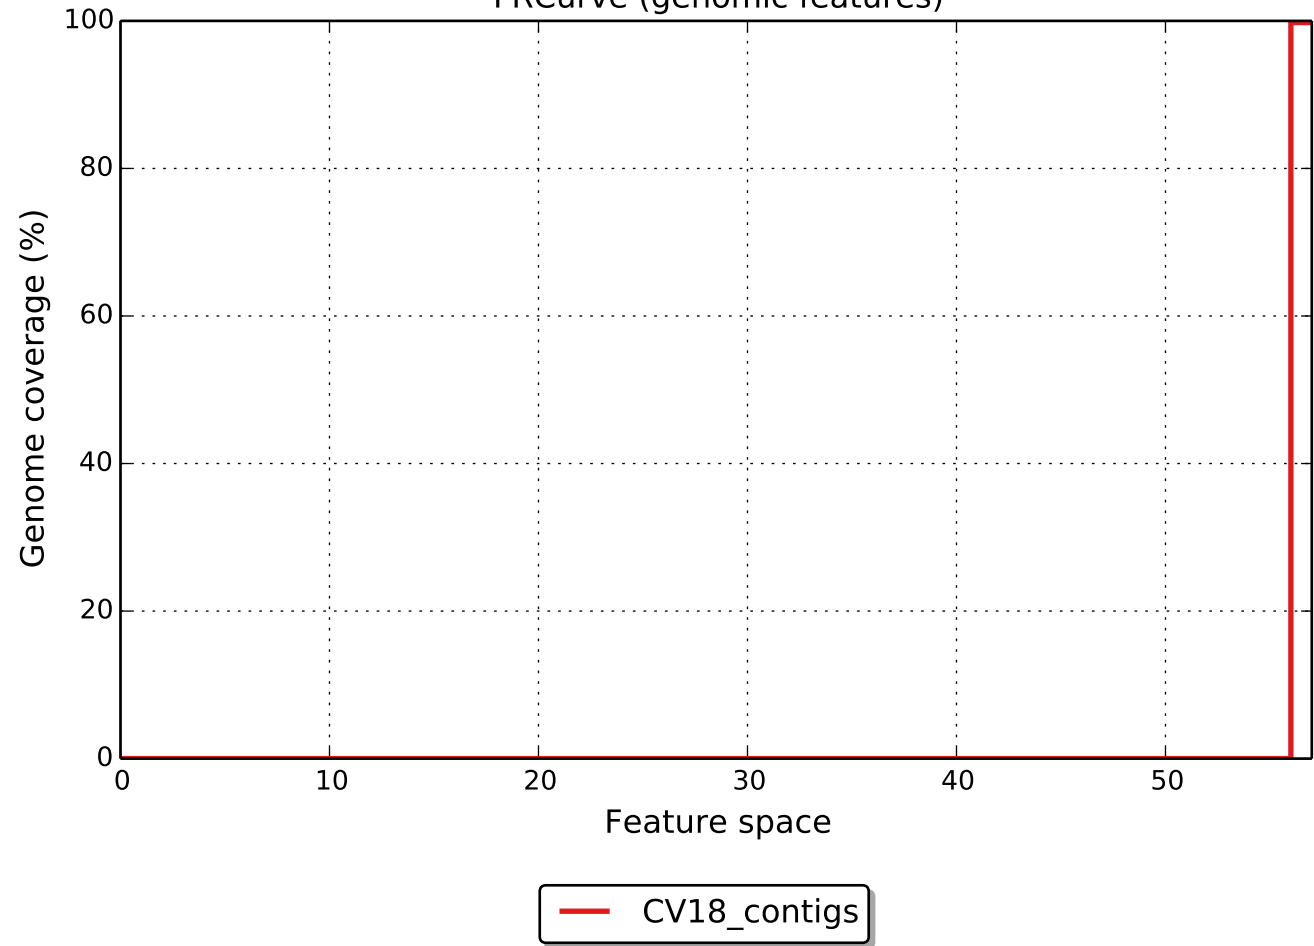

Supplement: Supplementary_File_2.zip [file Supplementary_File_2.zip]

GC content

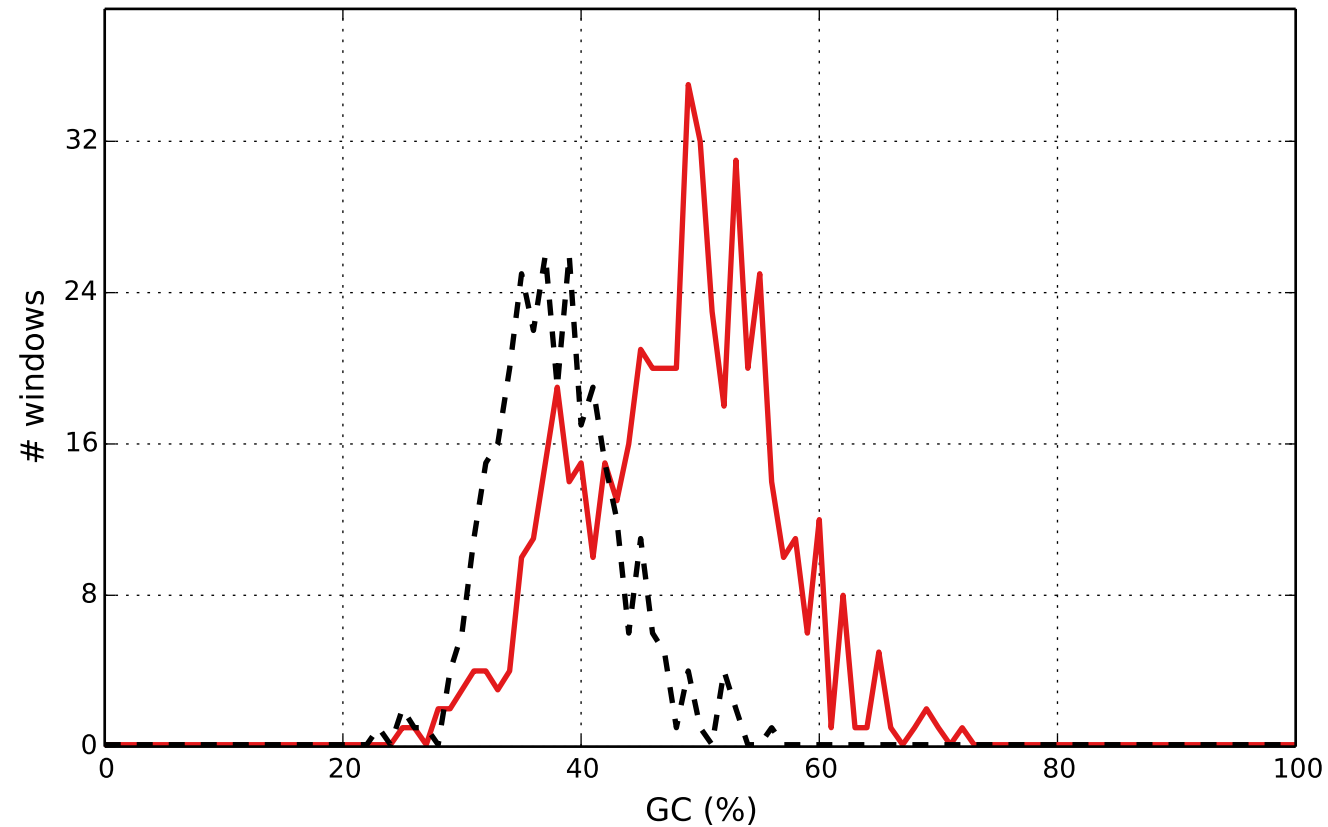

— CV18\_velvet\_contigs    - - Reference

Supplement: Supplementary_File_2.zip [file Supplementary_File_2.zip]

Cumulative length (aligned contigs)

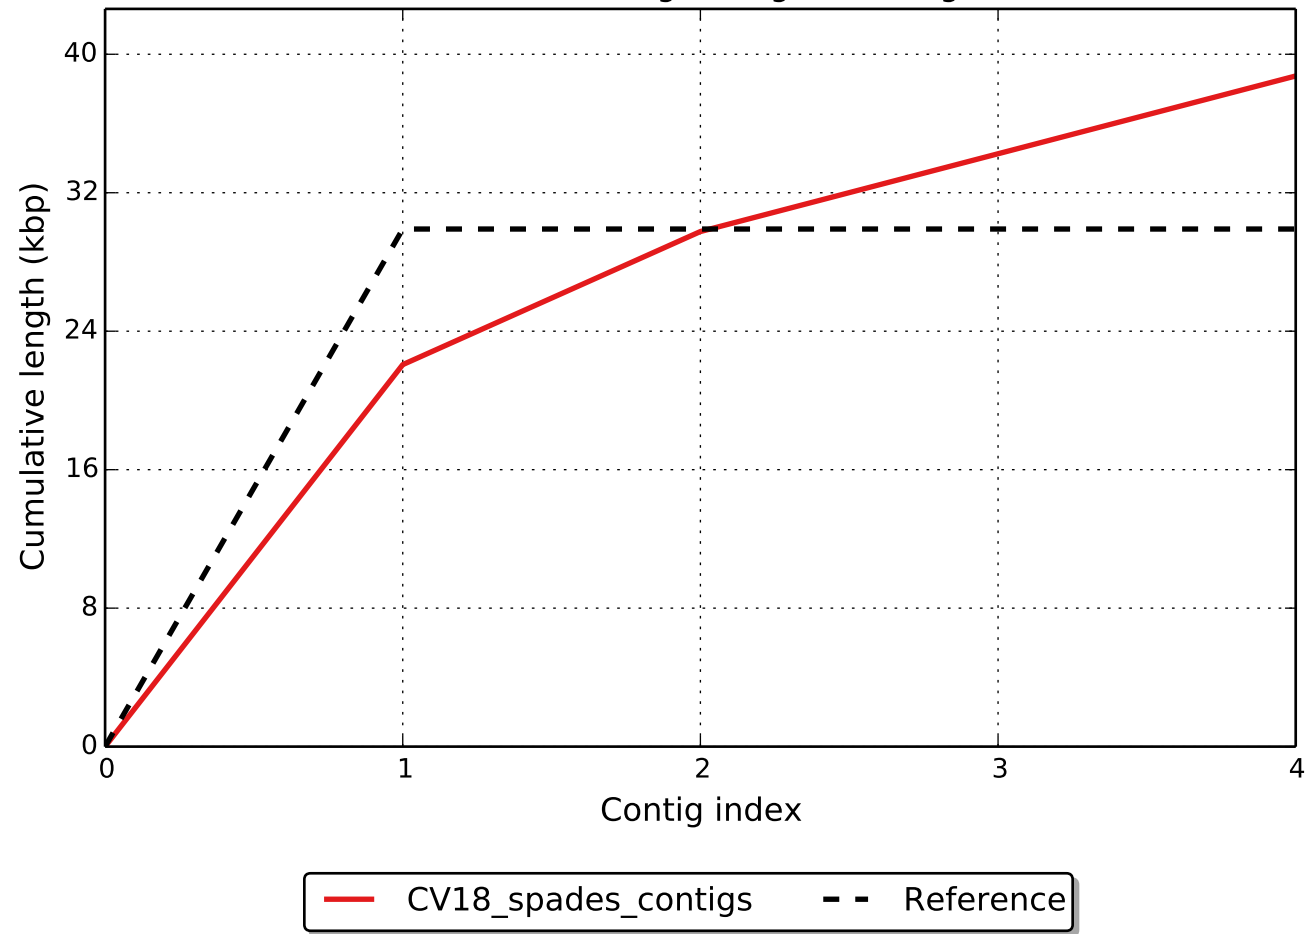

Supplement: Supplementary_File_2.zip [file Supplementary_File_2.zip]

NAX

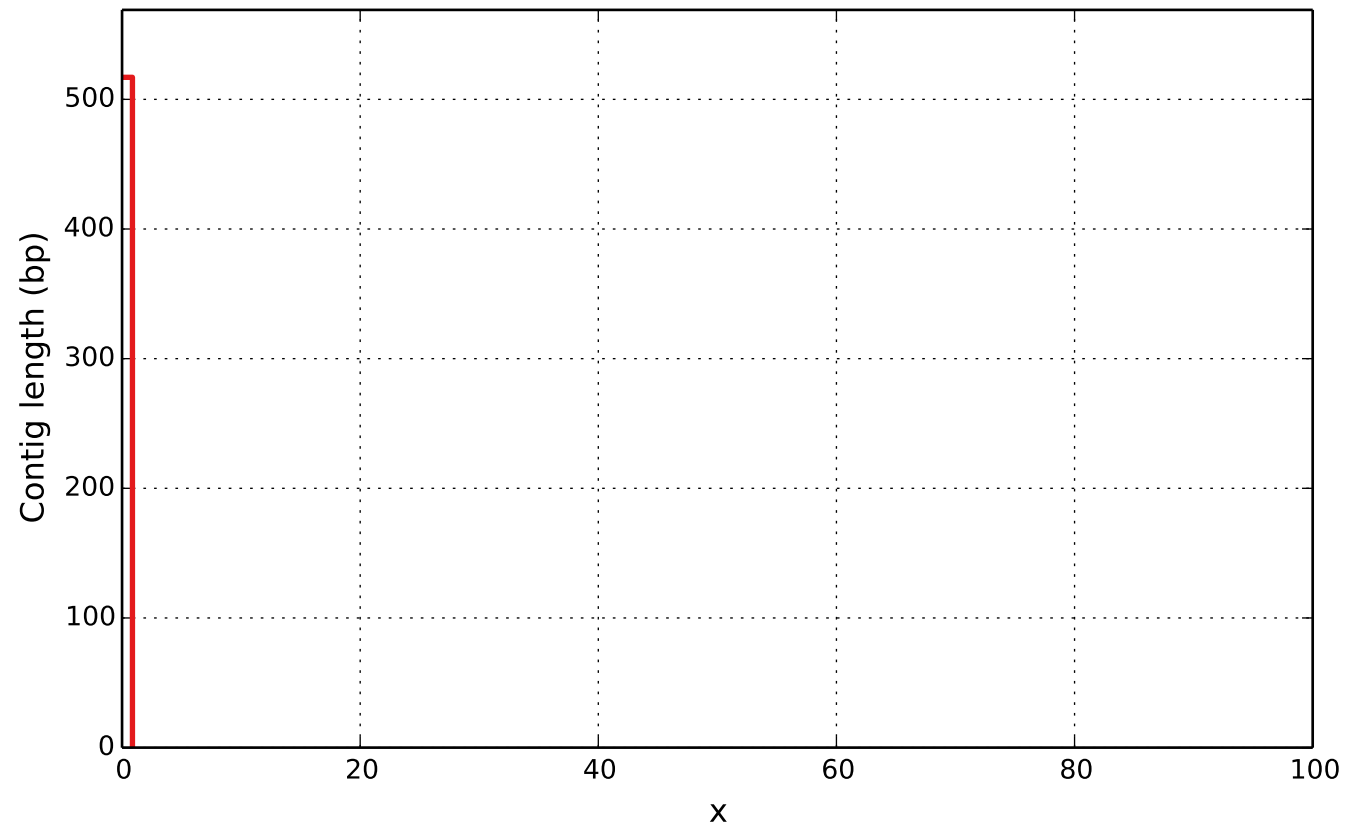

— CV29\_velvet\_contigs

Supplement: Supplementary_File_2.zip [file Supplementary_File_2.zip]

GC content

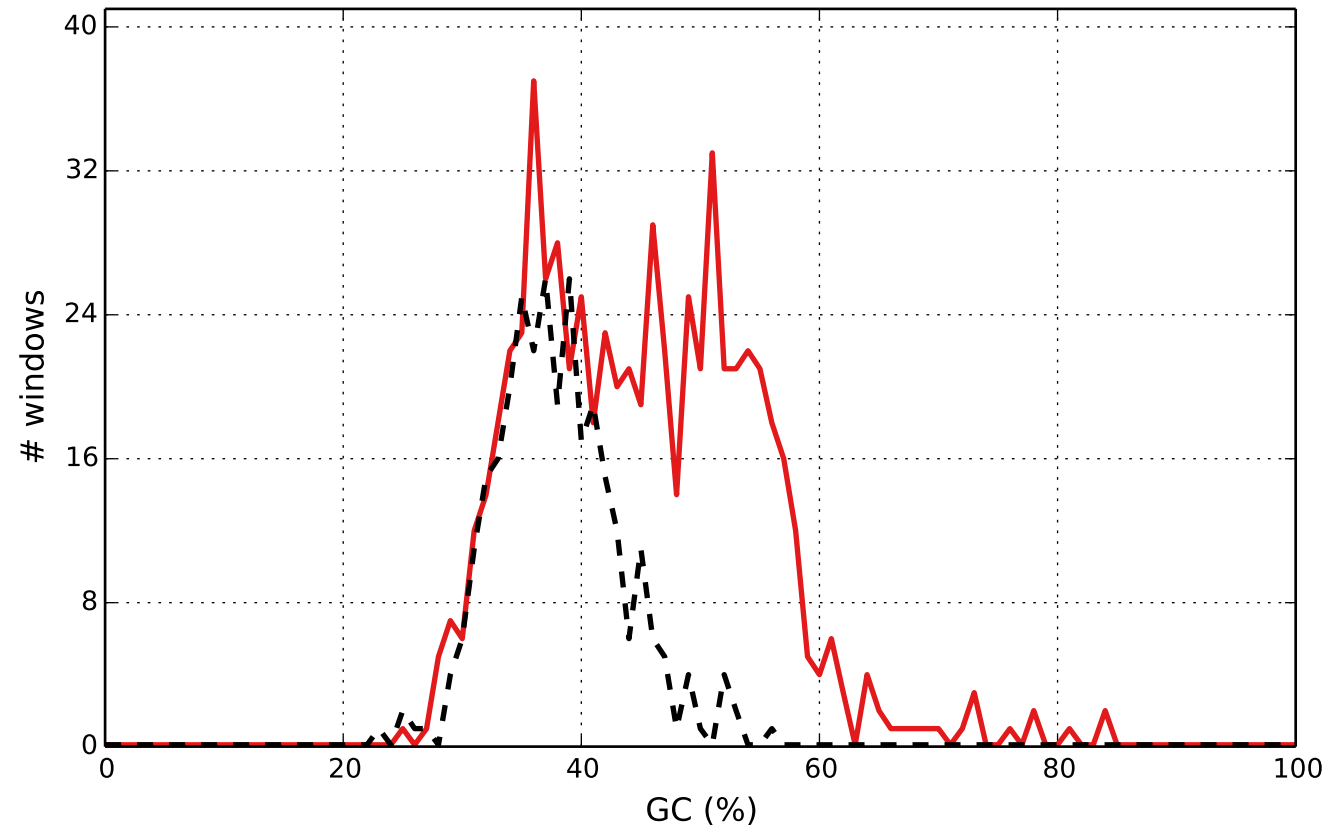

— CV29\_contigs    - - Reference

Supplement: Supplementary_File_2.zip [file Supplementary_File_2.zip]

# Misassemblies

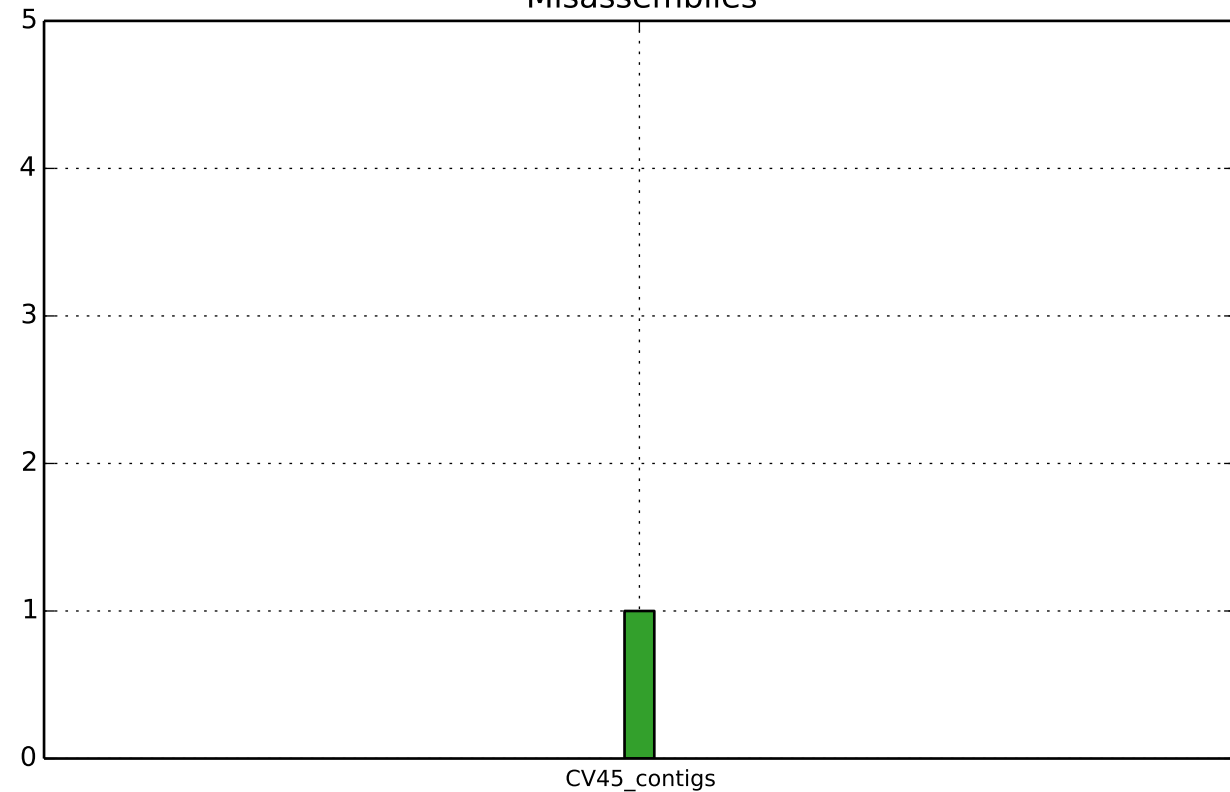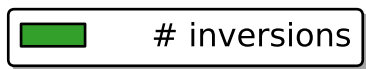

Supplement: Supplementary_File_2.zip [file Supplementary_File_2.zip]

Cumulative length

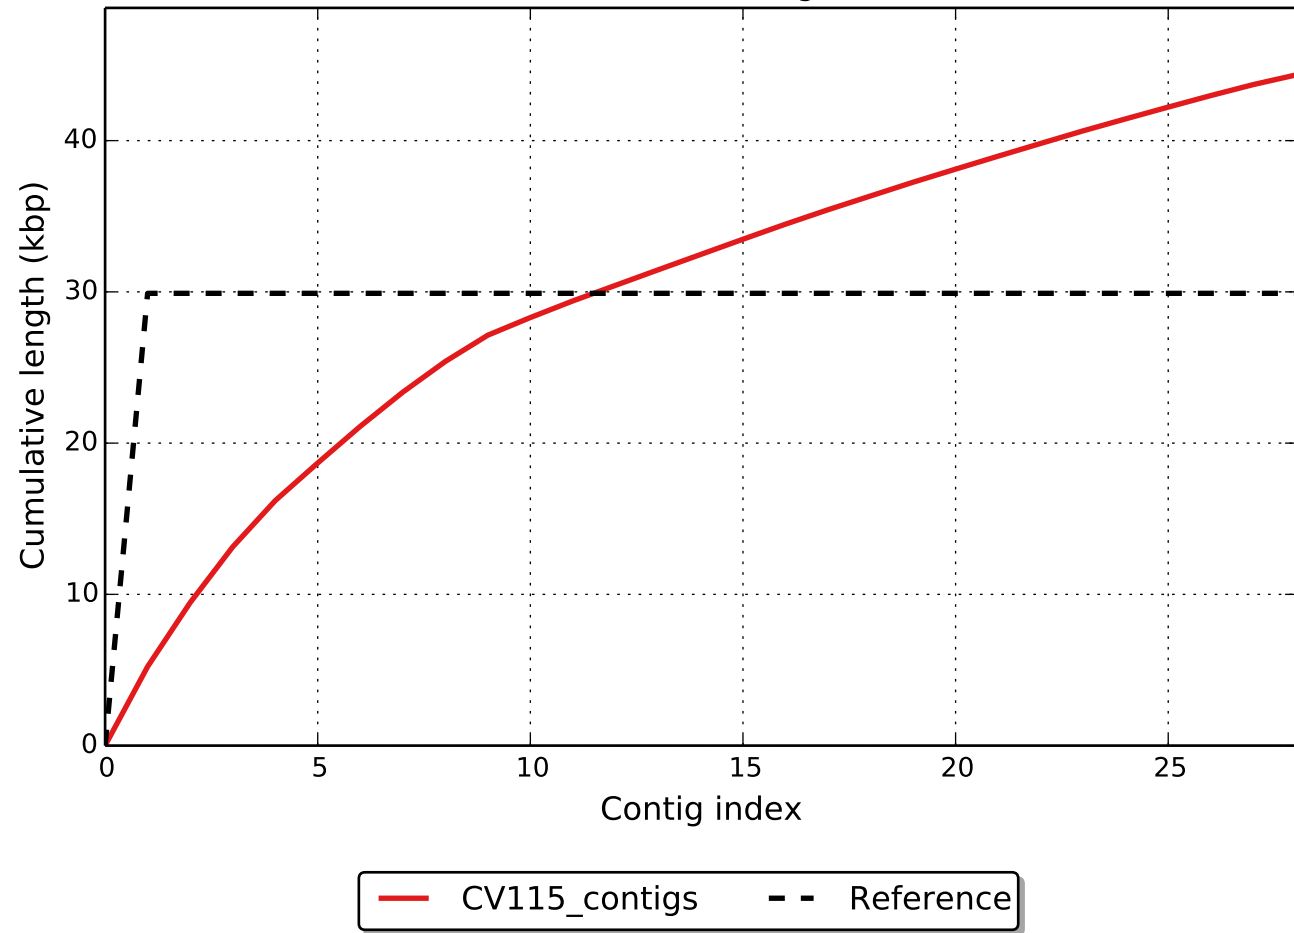

Supplement: Supplementary_File_2.zip [file Supplementary_File_2.zip]

FRCurve (misassemblies)

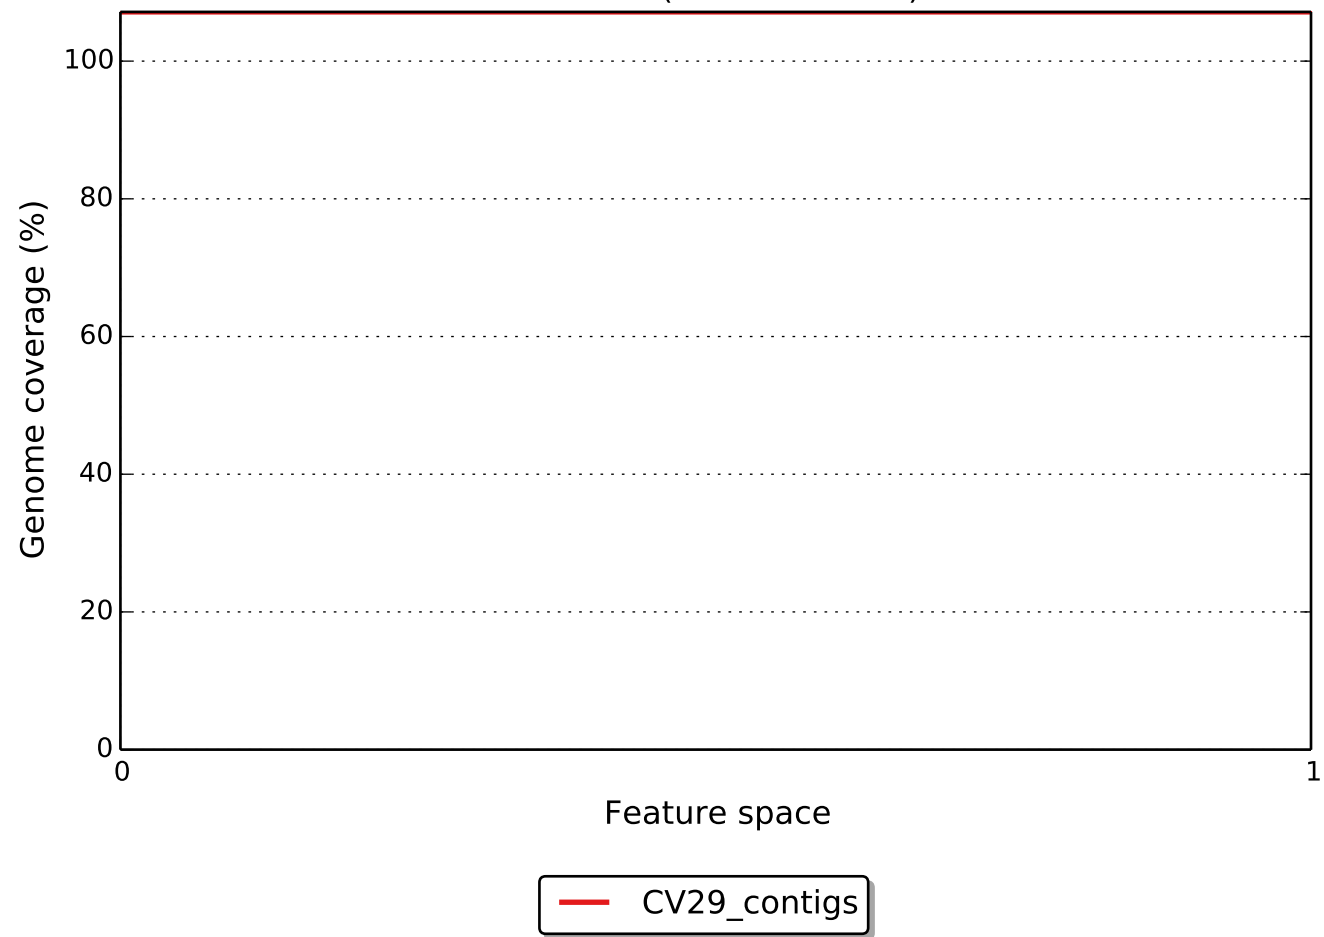

Supplement: Supplementary_File_2.zip [file Supplementary_File_2.zip]

Cumulative length

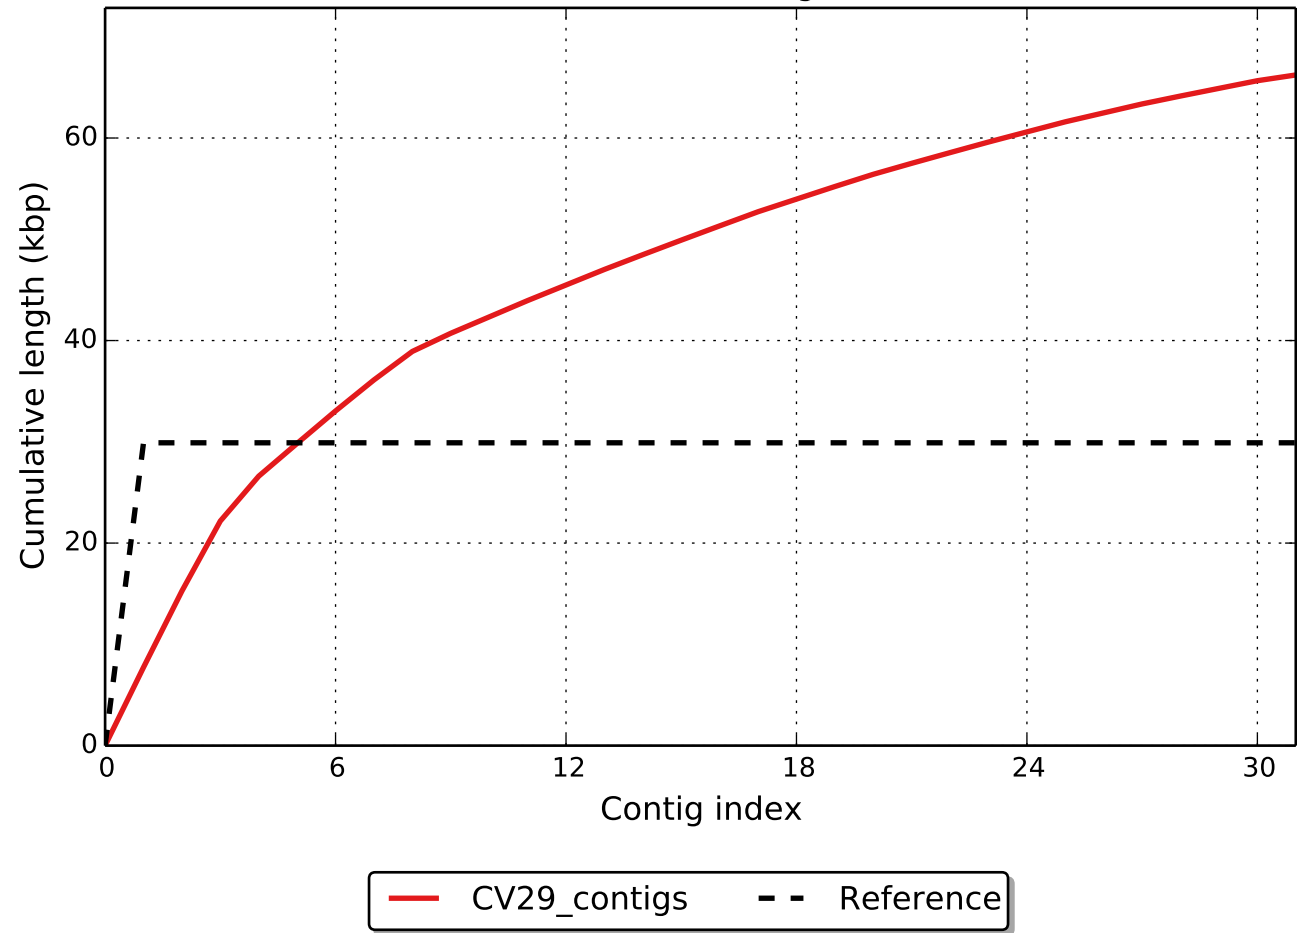

Supplement: Supplementary_File_2.zip [file Supplementary_File_2.zip]

Cumulative length (aligned contigs)

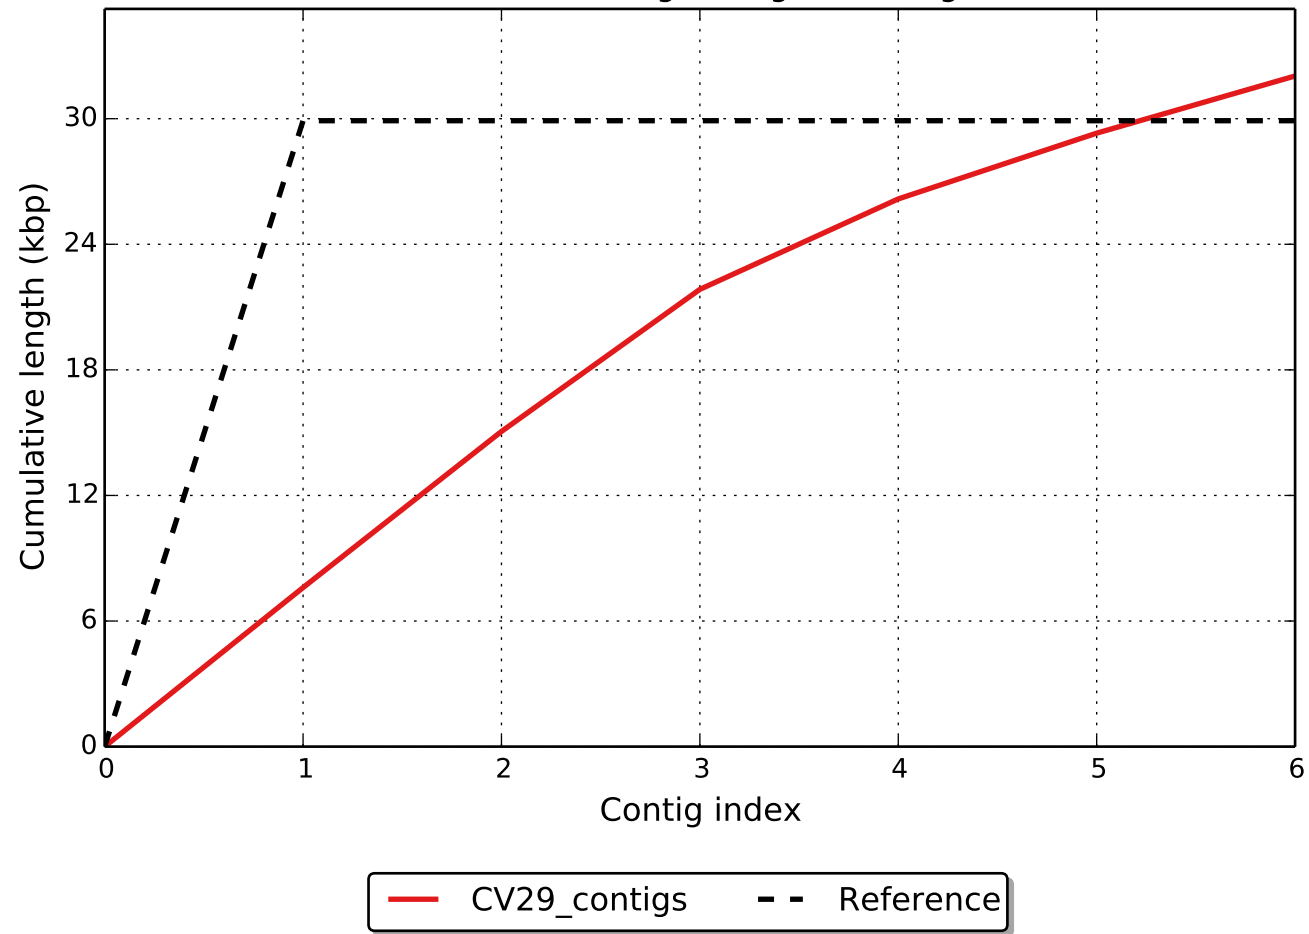

Supplement: Supplementary_File_2.zip [file Supplementary_File_2.zip]

Nx

Contig length (kbp)

20

15

10

5

0

20

40

60

80

100

x

CV18\_spades\_contigs

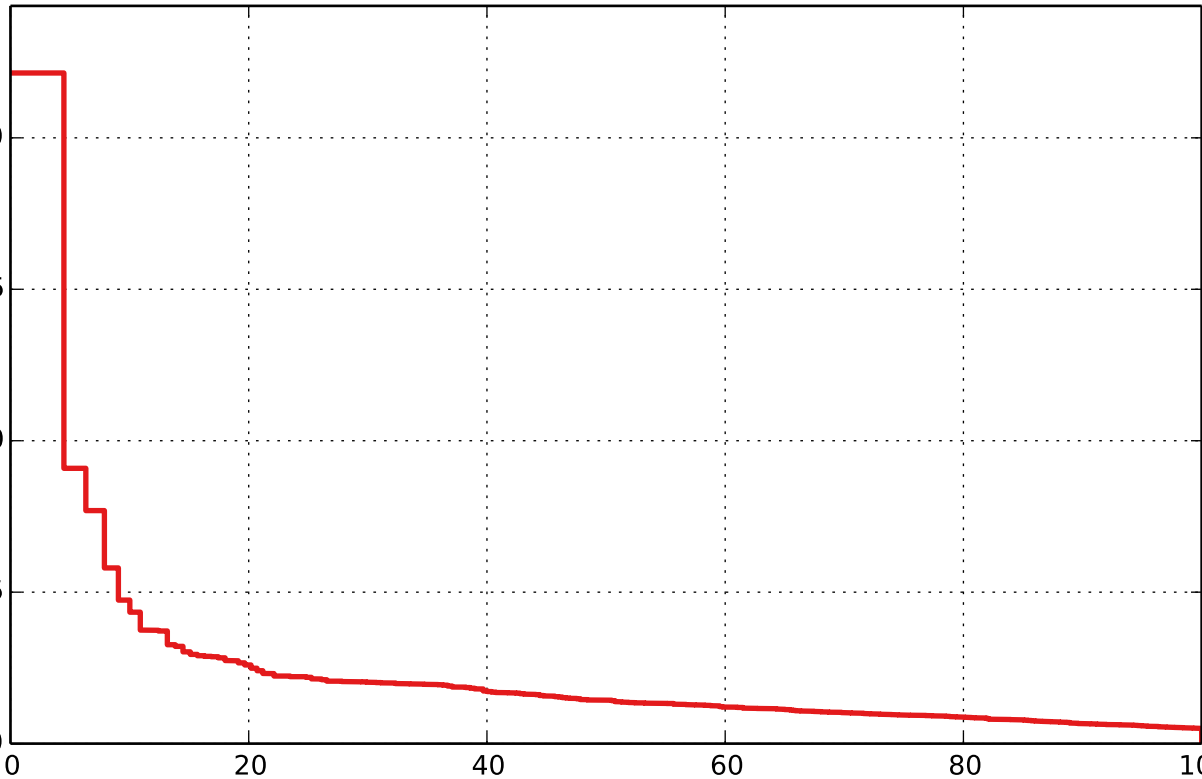

Supplement: Supplementary_File_2.zip [file Supplementary_File_2.zip]

Nx

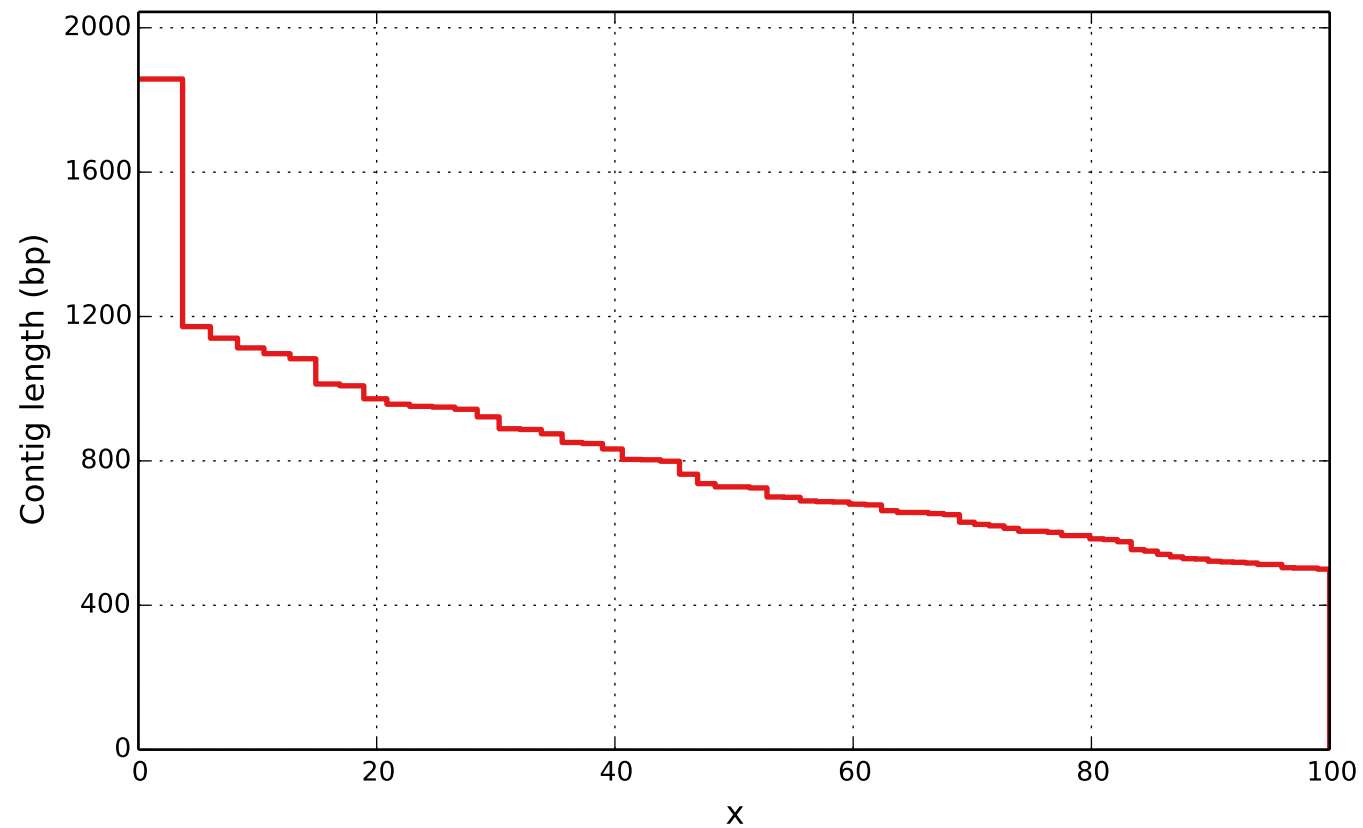

— CV18\_velvet\_contigs

Supplement: Supplementary_File_2.zip [file Supplementary_File_2.zip]

Cumulative length

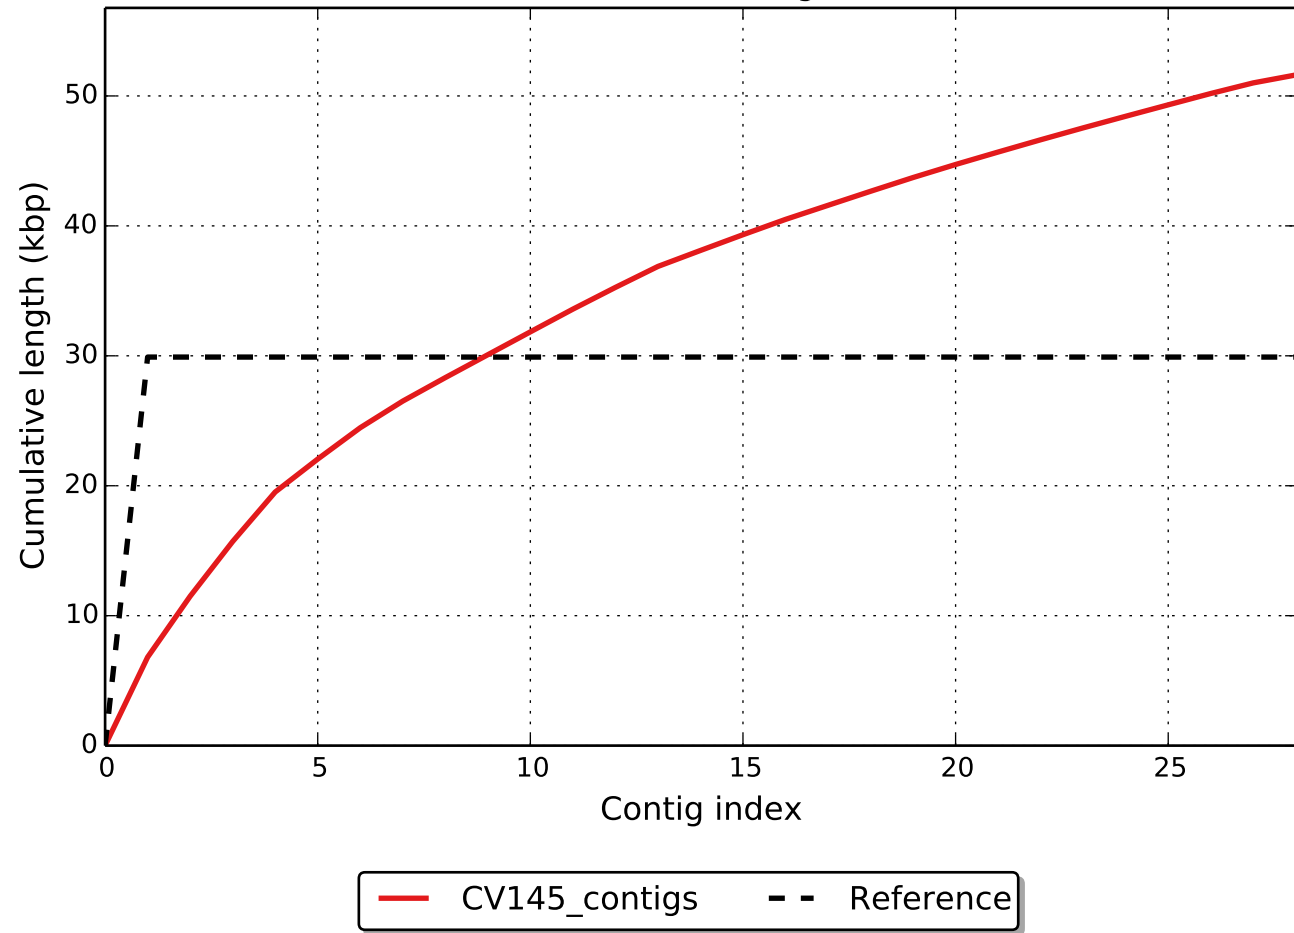

Supplement: Supplementary_File_2.zip [file Supplementary_File_2.zip]

Cumulative # complete genomic features

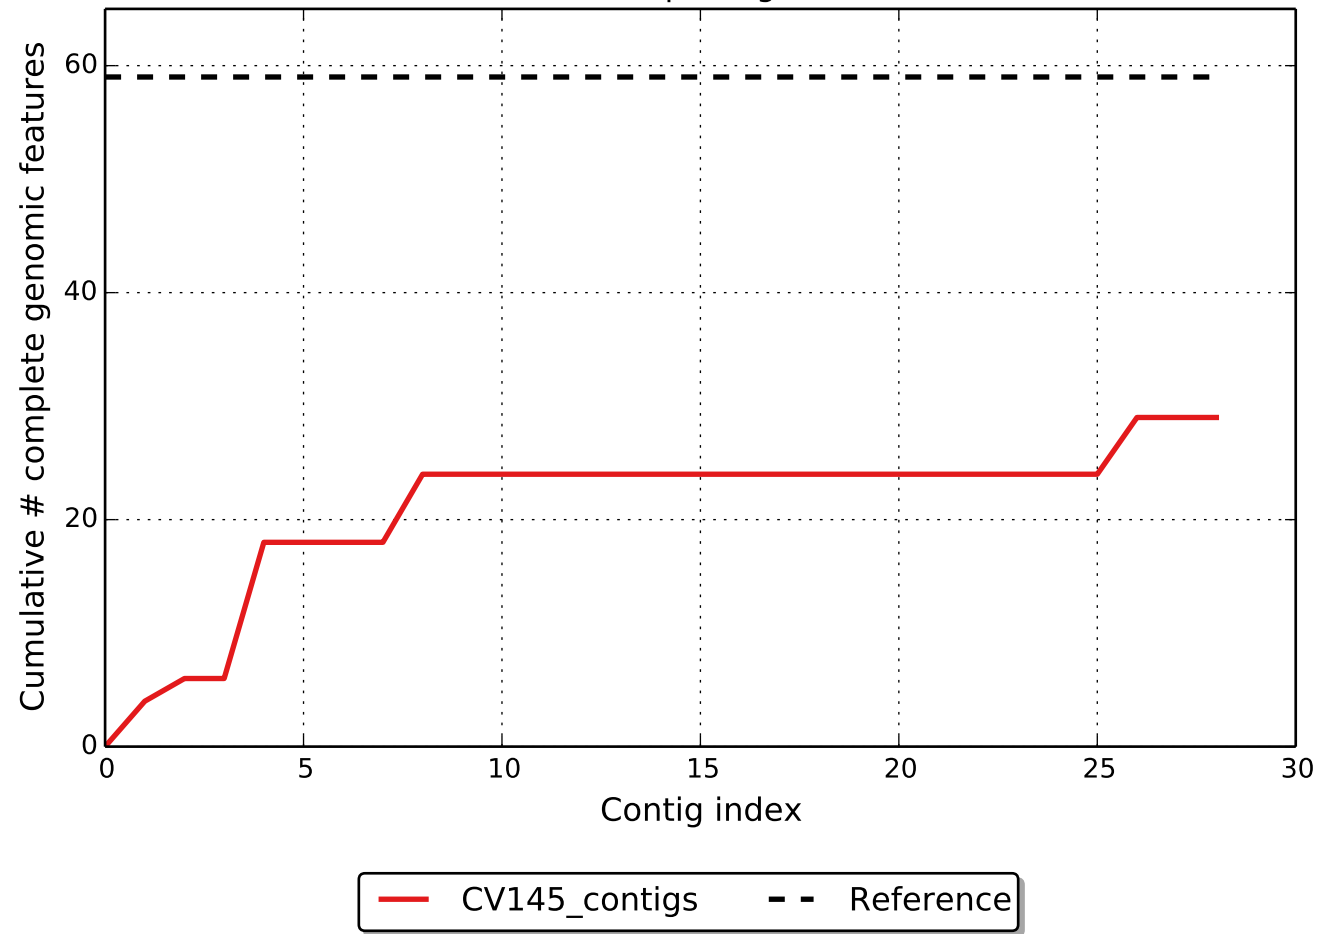

Supplement: Supplementary_File_2.zip [file Supplementary_File_2.zip]

CV18\_spades\_contigs GC content

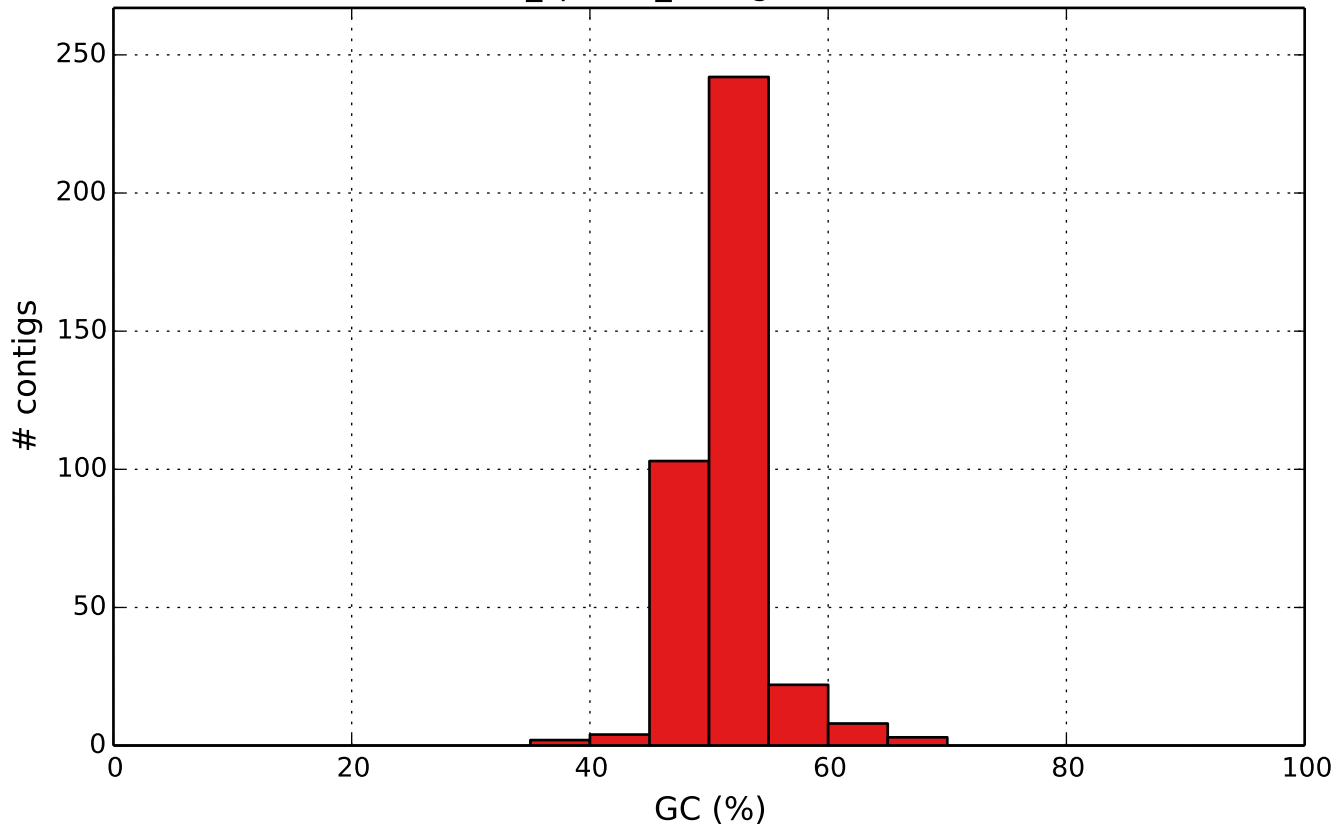

CV18\_spades\_contigs

Supplement: Supplementary_File_2.zip [file Supplementary_File_2.zip]

# Misassemblies

5

4

3

2

1

0

CV29\_contigs

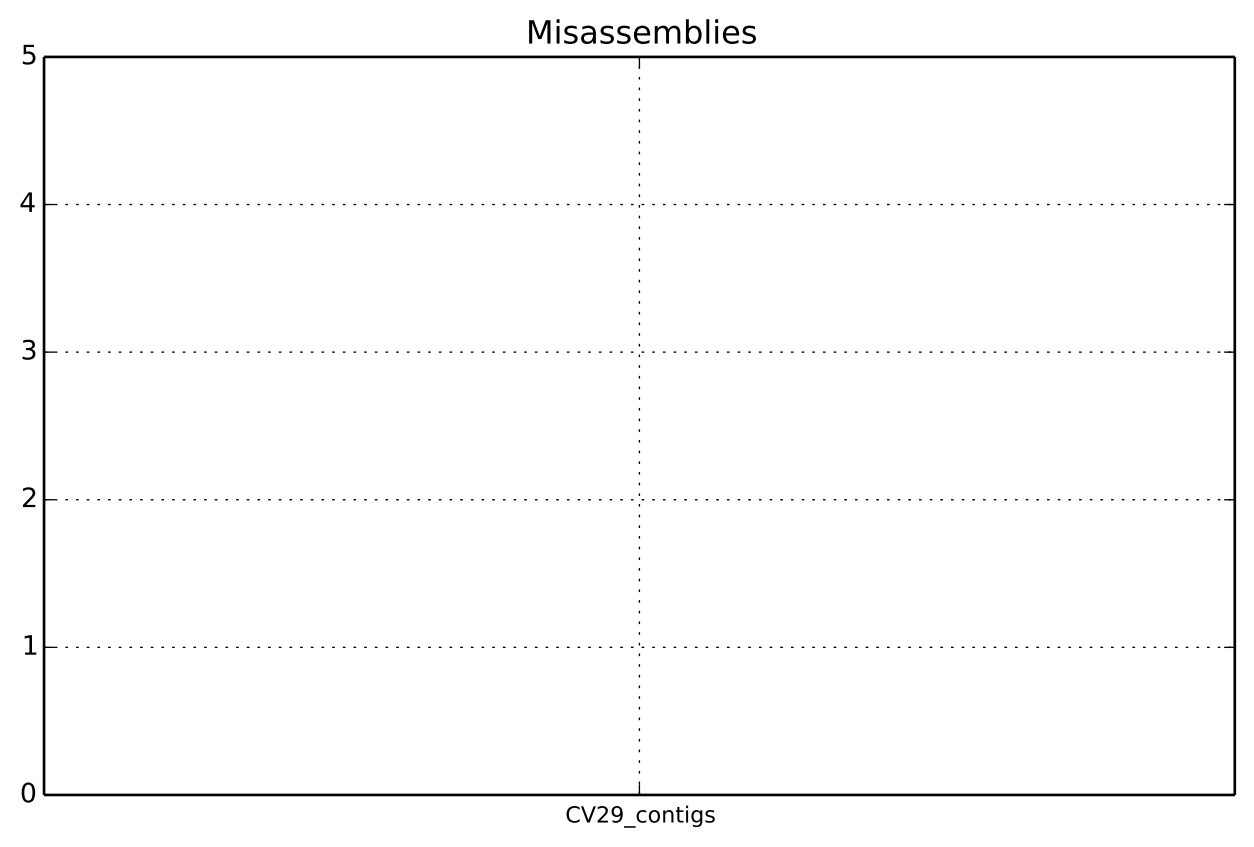

Supplement: Supplementary_File_2.zip [file Supplementary_File_2.zip]

NAx

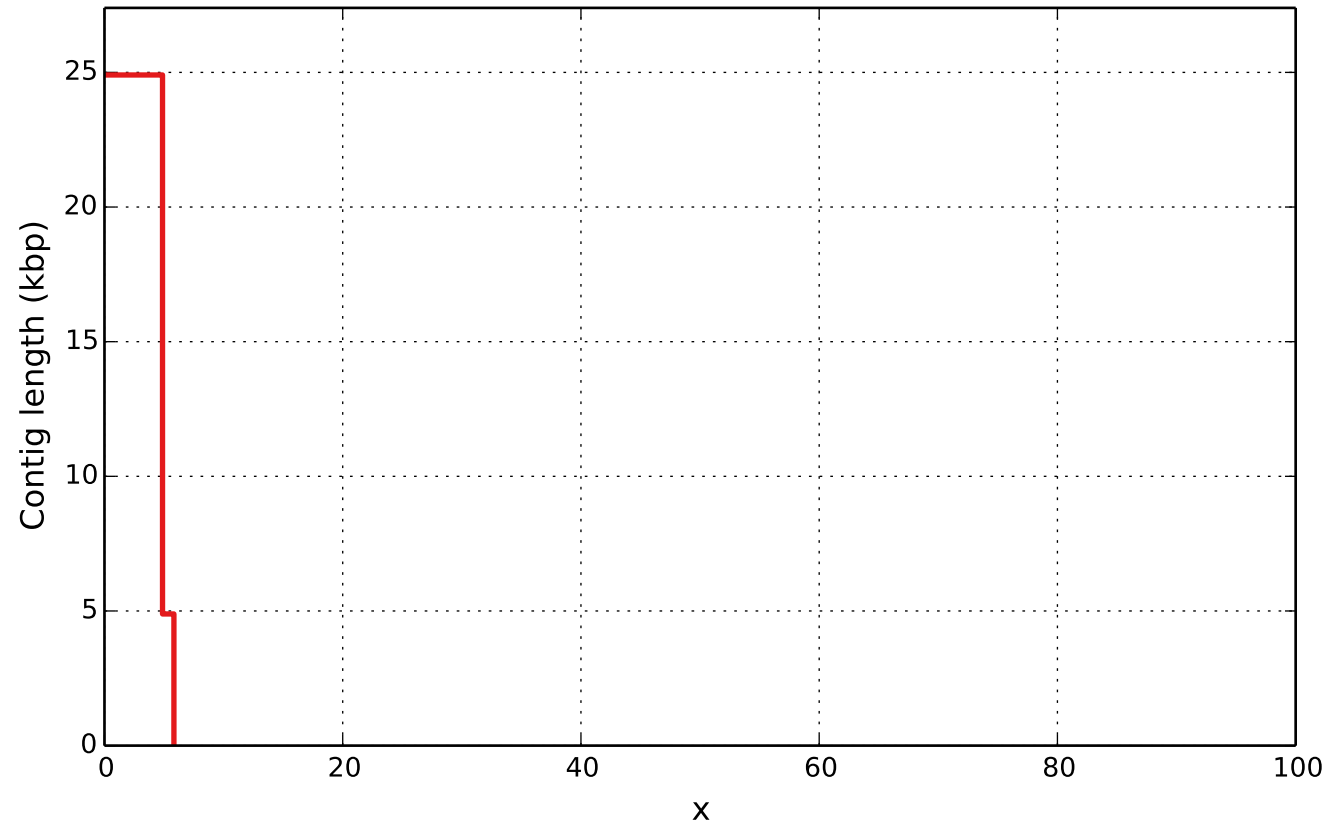

— CV29\_spades\_contigs

Supplement: Supplementary_File_2.zip [file Supplementary_File_2.zip]
