# Supplementary figures and images for: VGEA: an RNA viral assembly toolkit (part 2 of 2)
Source: PeerJ journal article supplement (doi:10.7717/peerj.12129), 2021-09-06

# Misassemblies

5

4

3

2

1

0

CV18\_contigs

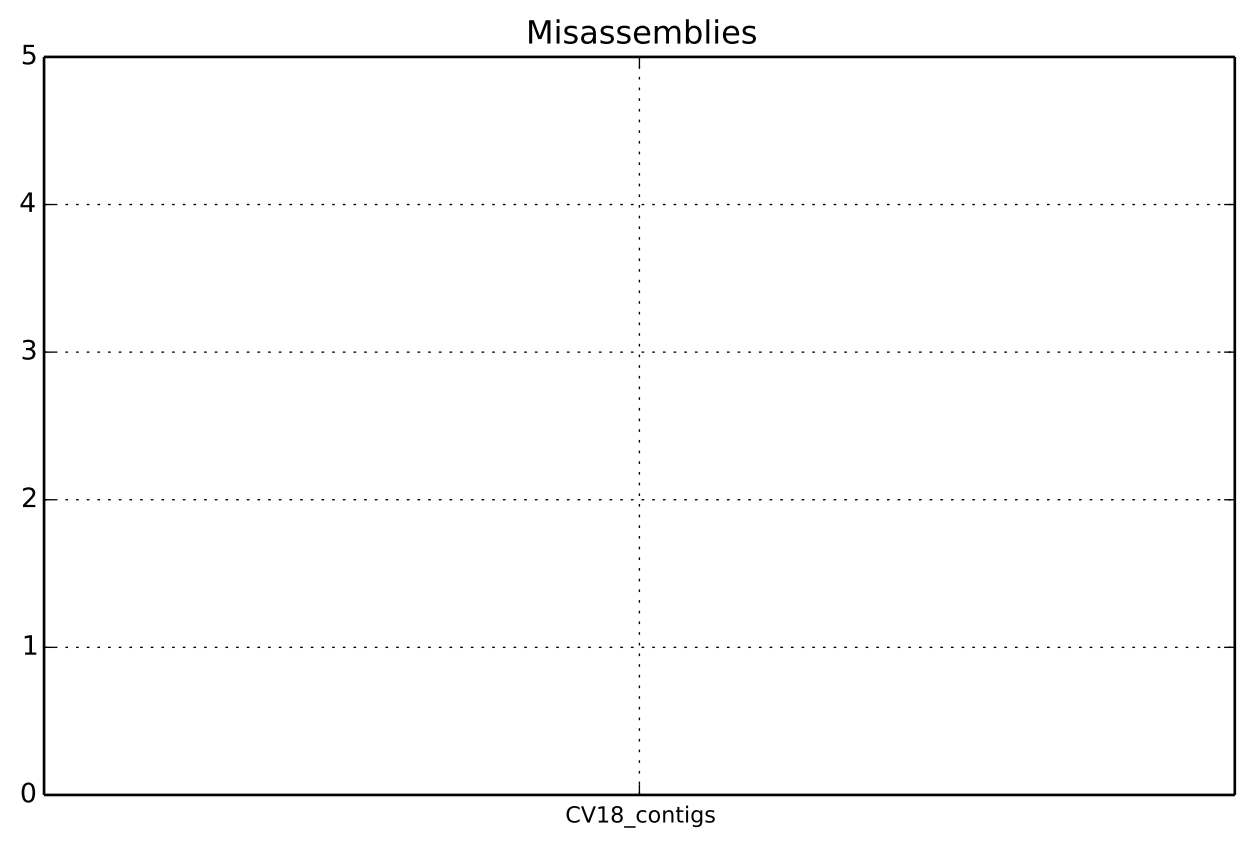

Supplement: Supplementary_File_2.zip [file Supplementary_File_2.zip]

NGx

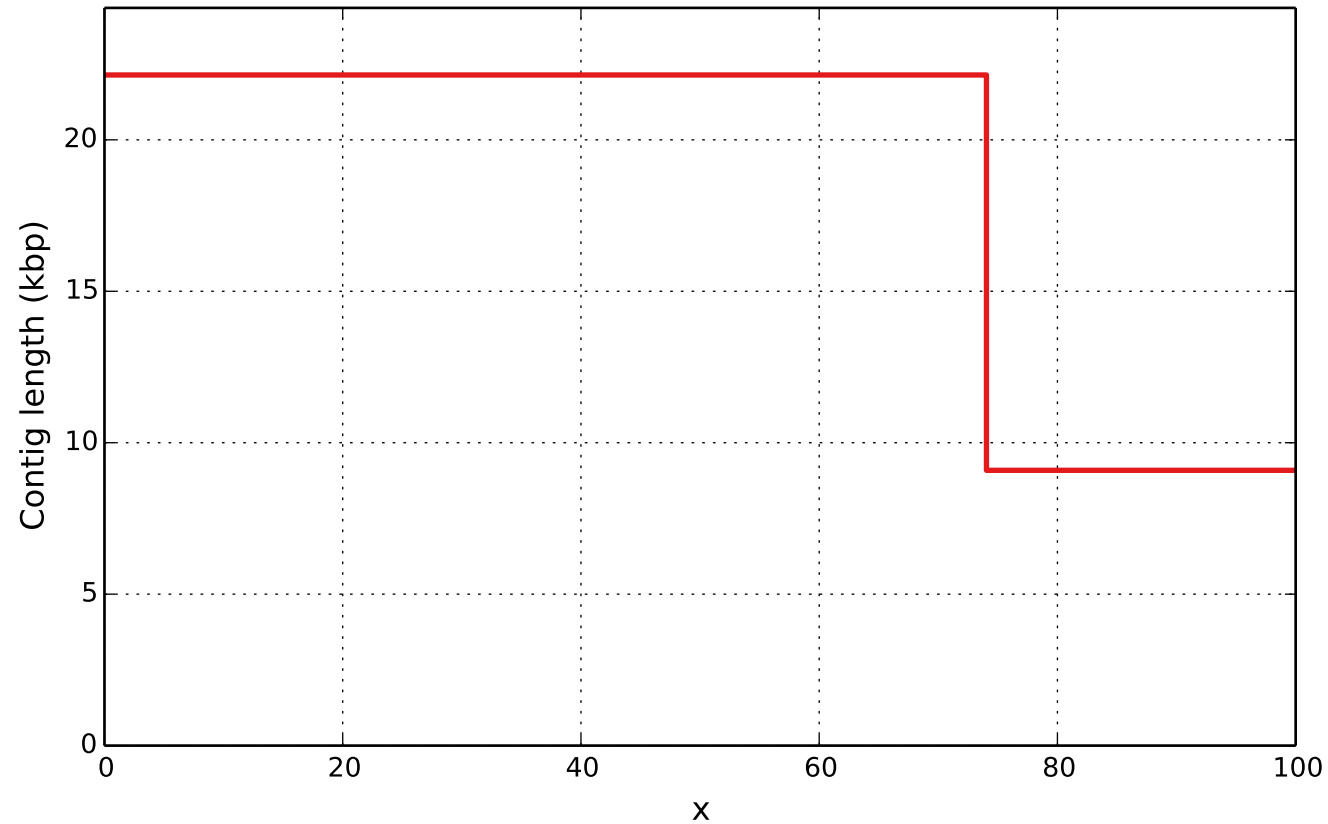

— CV18\_spades\_contigs

Supplement: Supplementary_File_2.zip [file Supplementary_File_2.zip]

FRCurve (misassemblies)

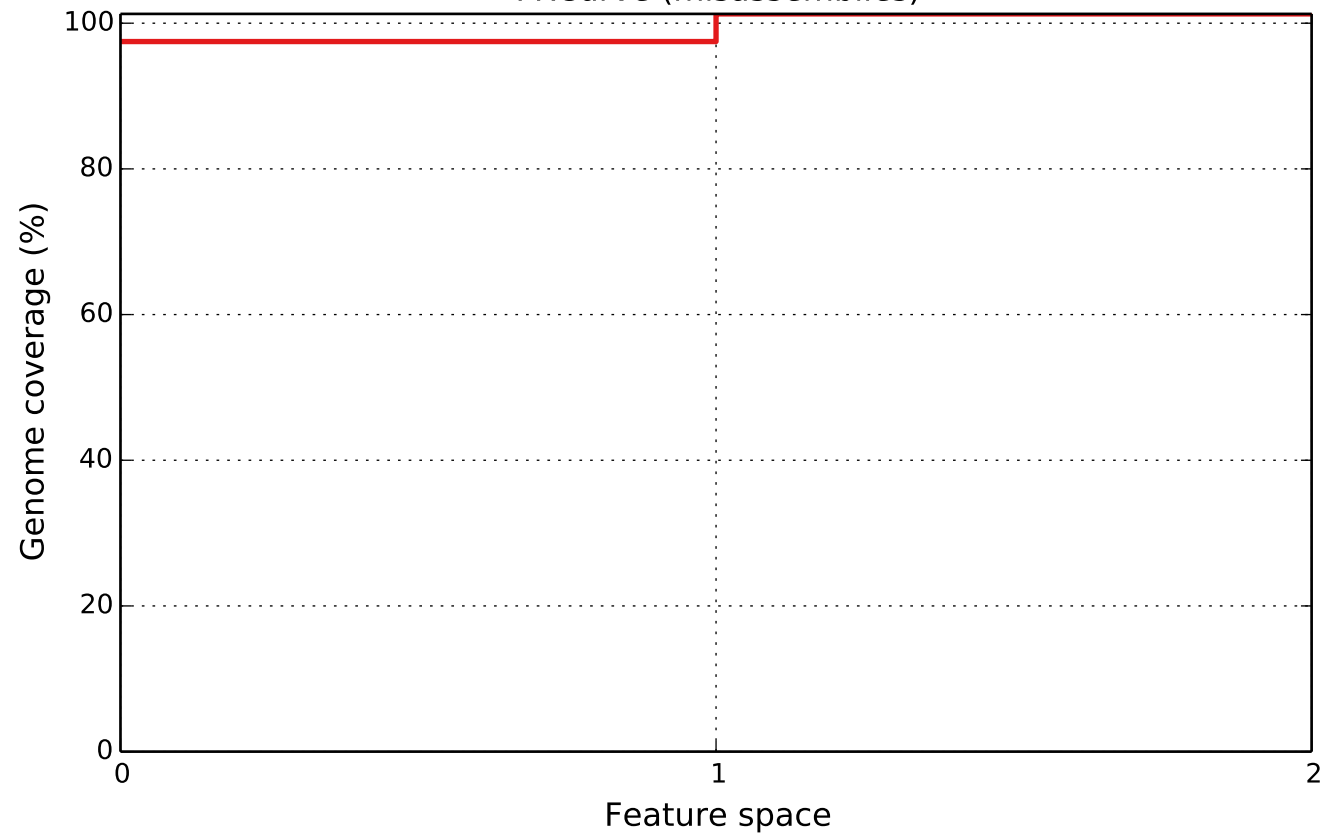

— CV45\_contigs

Supplement: Supplementary_File_2.zip [file Supplementary_File_2.zip]

Cumulative length

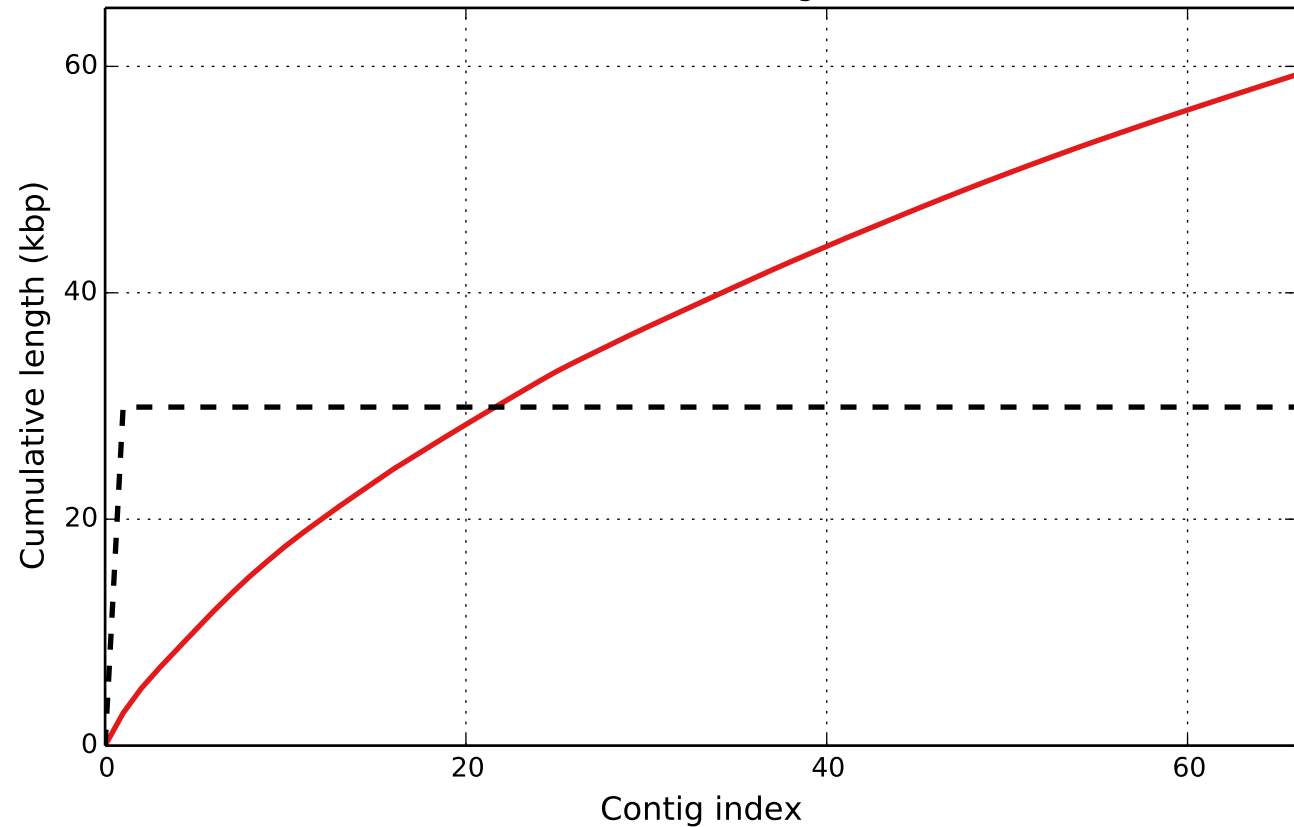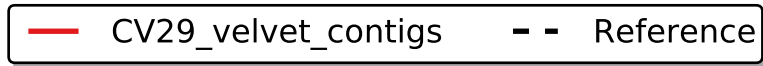

Supplement: Supplementary_File_2.zip [file Supplementary_File_2.zip]

CV115\_contigs GC content

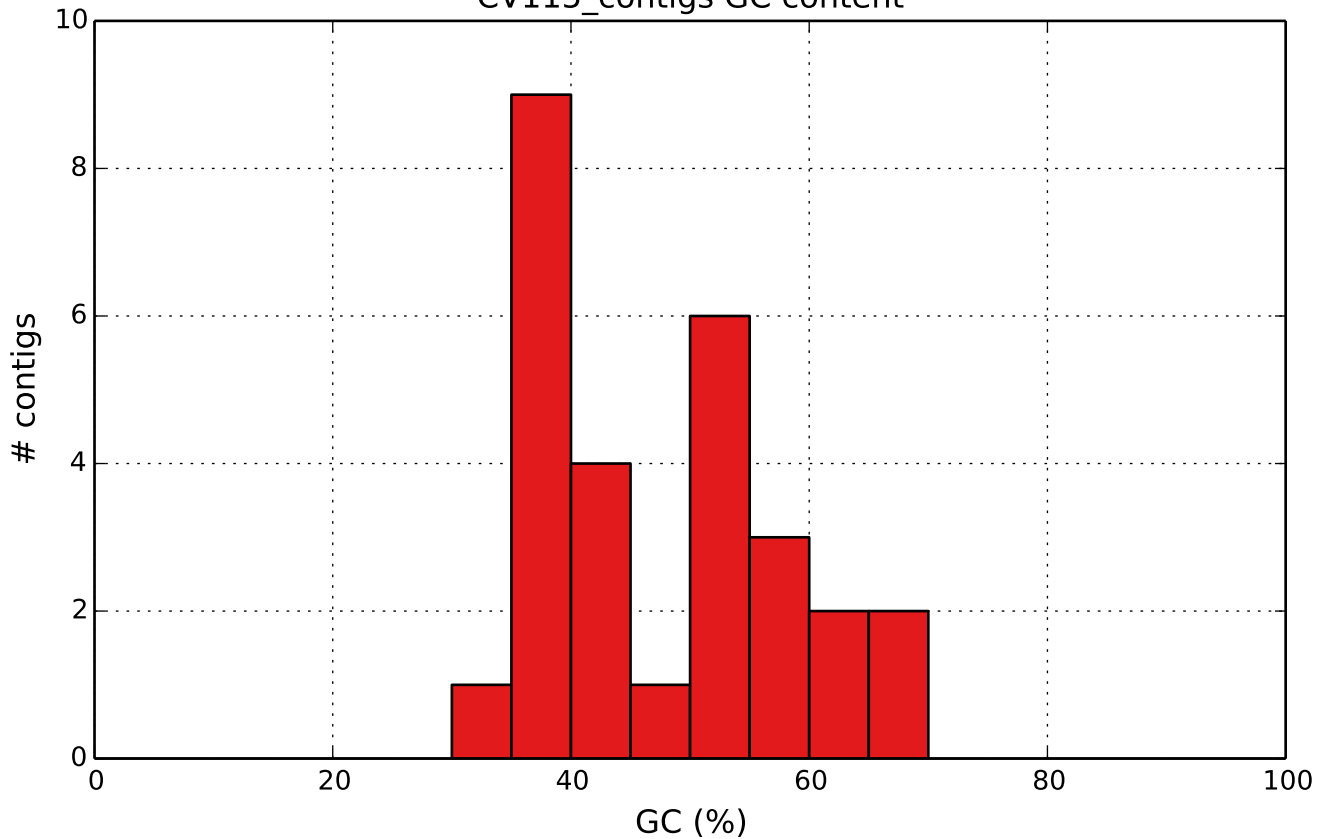

CV115\_contigs

Supplement: Supplementary_File_2.zip [file Supplementary_File_2.zip]

Nx

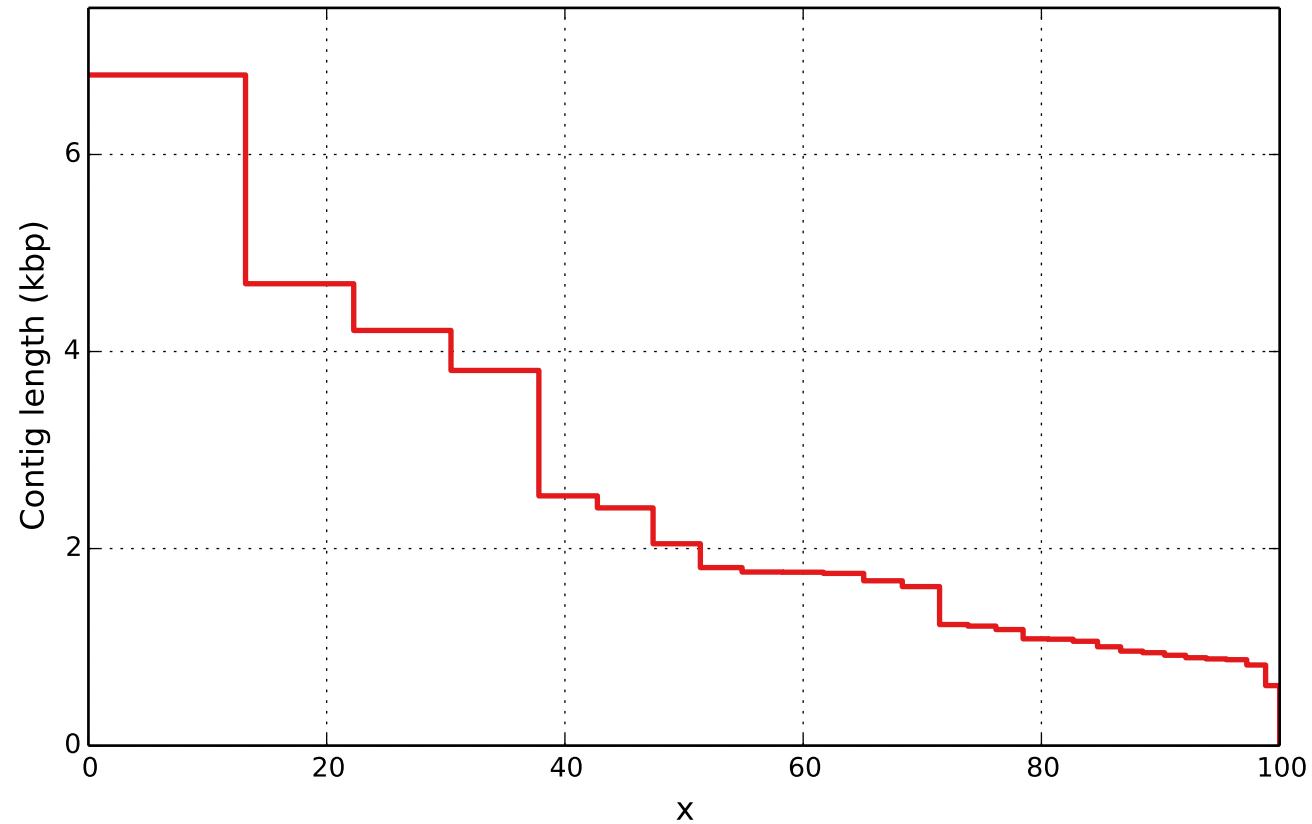

— CV145\_contigs

Supplement: Supplementary_File_2.zip [file Supplementary_File_2.zip]

FRCurve (genomic features)

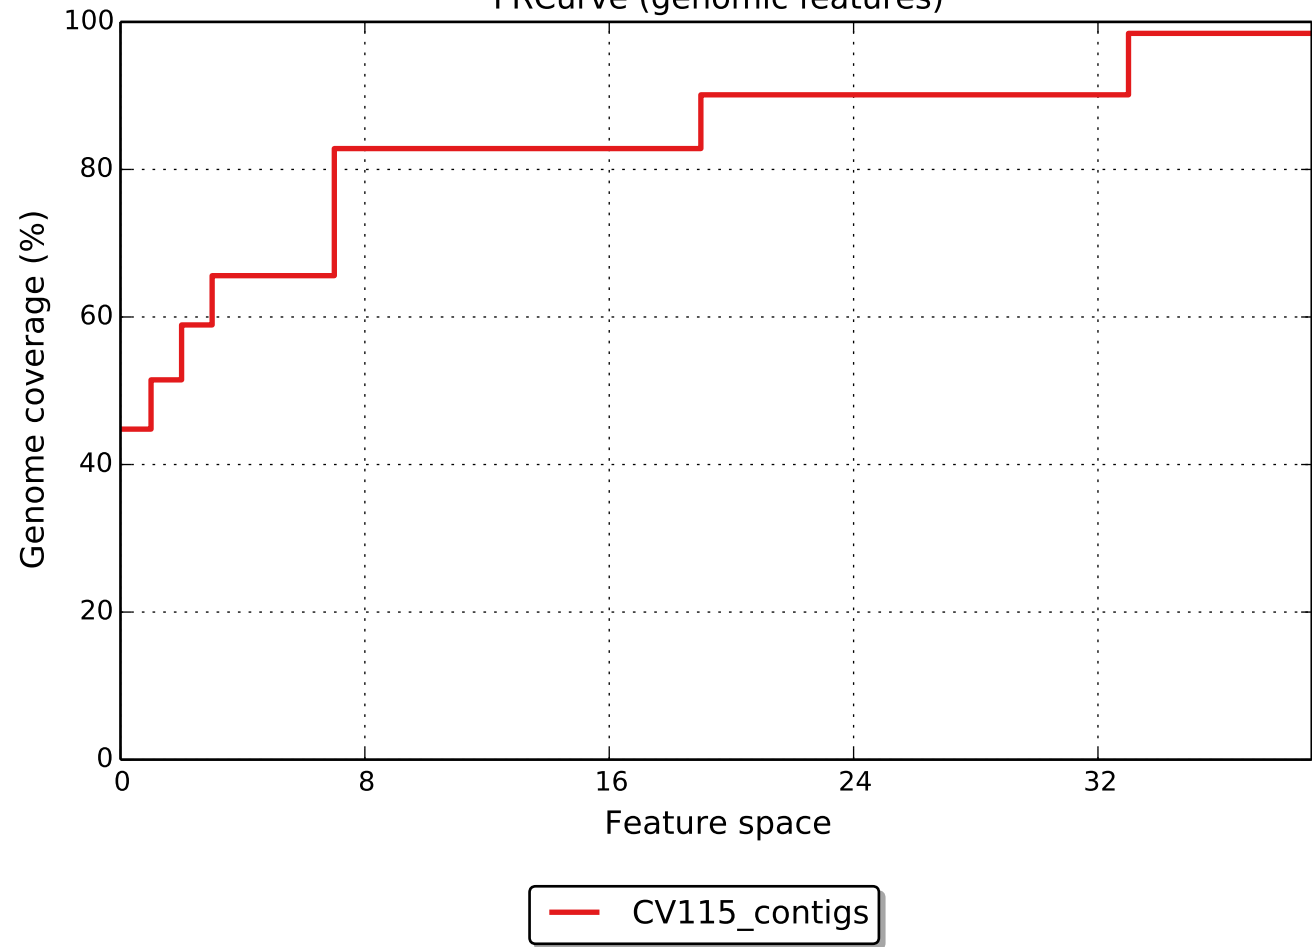

Supplement: Supplementary_File_2.zip [file Supplementary_File_2.zip]

FRCurve (misassemblies)

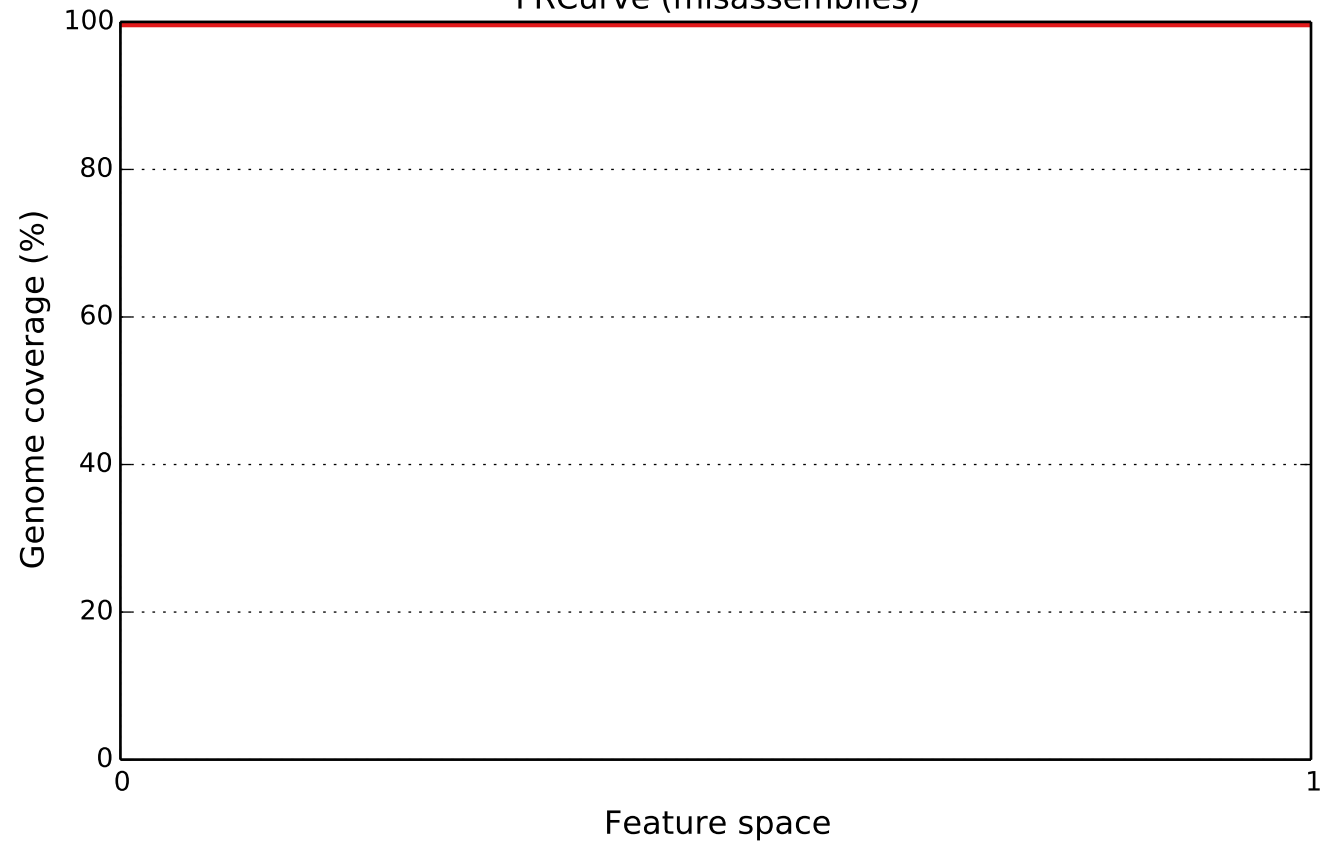

CV29\_spades\_contigs

Supplement: Supplementary_File_2.zip [file Supplementary_File_2.zip]
